# Supplementary material for: Checklist of British and Irish Hymenoptera - Braconidae
Source: Biodivers Data J. 2016 Apr 21;(4):e8151. doi: 10.3897/BDJ.4.e8151 (PMC4867695; doi:10.3897/BDJ.4.e8151)
Supplement: Supplementary material 2 — Checklist of British and Irish Braconidae [file biodiversity_data_journal-4-e8151-s002.xlsx]

## Sheet: Taxa
Taxon_Local_ID	Kingdom	Subkingdom	Phylum	Subphylum	Superclass	Class	Subclass	Superorder	Order	Suborder	Infraorder	Superfamily	Family	Subfamily	Tribe	Subtribe	Genus	Subgenus	Species	Subspecies	Variety	Form	Authorship	Nomenclature	Feeds on	Symbiotic with	Parasite of	Host of	Native Status	Conservation Status	Distribution	Horizon	Notes
40001	Animalia		Arthropoda			Insecta			Hymenoptera			Ichneumonoidea	Braconidae	Agathidinae									Haliday, 1833										Except for Agathis and ‘Bassus’ species (i.e. including Lytopylus and Therophilus), distribution and synonymic data from Nixon (1986).
40002	Animalia		Arthropoda			Insecta			Hymenoptera			Ichneumonoidea	Braconidae	Agathidinae	Agathidini								Nees, 1814	<p style="margin-left: 40px;"><i>BASSINI </i>Nees, 1812 invalid</p><p style="margin-left: 40px;"><i>EUMICRODINI </i>Förster, 1863</p><p style="margin-left: 40px;"><i>BASSINI </i>Förster, 1869 preocc.</p><p style="margin-left: 40px;"><i>MICRODINI </i>Ashmead, 1900</p><p style="margin-left: 40px;"><i>MESOCOELINI </i>Viereck, 1918</p><p style="margin-left: 40px;"><i>ANEUROBRACONINI </i>Fahringer, 19…
40003	Animalia		Arthropoda			Insecta			Hymenoptera			Ichneumonoidea	Braconidae	Agathidinae	Agathidini		Agathis						Latreille, 1804	<p style="margin-left: 40px;"><i>AENIGMOSTOMUS </i>Ashmead, 1900</p><p style="margin-left: 40px;"><i>METRIOSOMA </i>Szépligeti, 1902</p><p style="margin-left: 40px;"><i>BAEOGNATHA </i>Kokujev, 1903</p><p style="margin-left: 40px;"><i>LISSAGATHIS </i>Cameron, 1911</p><p style="margin-left: 40px;"><i>RHAMPHAGATHIS </i>Tobias, 1962</p>									Distribution and synonymic data from Nixon (1986) and Simbolotti &amp; van Achterberg (1999). Species of Agathis excluded from the British and Irish list: [malvacearum Latreille, 1805 panzeri (Jurine, 1807, Ichneumon) metzneriae Muesebeck, 1967] Listed by Huddleston (1978); probably refers to varipes.
40004	Animalia		Arthropoda			Insecta			Hymenoptera			Ichneumonoidea	Braconidae	Agathidinae	Agathidini		Agathis		anglica				Marshall, 1885	<p style="margin-left: 40px;"><i>longicauda </i>Kokujev, 1895 preocc.</p><p style="margin-left: 40px;"><i>?marshalli </i>Fahringer, 1937</p><p style="margin-left: 40px;"><i>albanica </i>Fischer, 1957</p><p style="margin-left: 40px;"><i>syriaca </i>Fischer, 1957</p><p style="margin-left: 40px;"><i>caucasica </i>Tobias, 1963</p><p style="margin-left: 40px;"><i>taiwanensis </i>Chou &amp; Sharkey, 19…							England, Wales
40005	Animalia		Arthropoda			Insecta			Hymenoptera			Ichneumonoidea	Braconidae	Agathidinae	Agathidini		Agathis		assimilis				Kokujev, 1895	<p style="margin-left: 40px;"><i>propinqua </i>Kokujev, 1895</p><p style="margin-left: 40px;"><i>jakowlewi </i>Kokujev, 1895</p><p style="margin-left: 40px;"><i>sibirica </i>Telenga, 1933</p><p style="margin-left: 40px;"><i>anchisiades </i>Nixon, 1986</p>							Scotland		added by Nixon (1986)
40006	Animalia		Arthropoda			Insecta			Hymenoptera			Ichneumonoidea	Braconidae	Agathidinae	Agathidini		Agathis		breviseta				Nees, 1812	<p style="margin-left: 40px;"><i>achterbergi </i>Nixon, 1986</p>							England, Scotland, Ireland		Simbolotti & van Achterberg (1999) synonymised Agathis achterbergi Nixon, 1986 under breviseta but it is listed as a valid species in Taxapad.
40007	Animalia		Arthropoda			Insecta			Hymenoptera			Ichneumonoidea	Braconidae	Agathidinae	Agathidini		Agathis		fuscipennis				(Zetterstedt, 1838)	<p style="margin-left: 40px;"><i>Microgaster fuscipennis </i>Zetterstedt, 1838</p><p style="margin-left: 40px;"><i>breviseta </i>misident.</p><p style="margin-left: 40px;"><i>rostrata </i>misident.</p><p style="margin-left: 40px;"><i>glabricula </i>Thomson, 1895</p><p style="margin-left: 40px;"><i>schmiedeknechti </i>Kokujev, 1895</p><p style="margin-left: 40px;"><i>annulata </i>Fahringer, 1937</…							England, Ireland
40008	Animalia		Arthropoda			Insecta			Hymenoptera			Ichneumonoidea	Braconidae	Agathidinae	Agathidini		Agathis		griseifrons				Thomson, 1895	<p style="margin-left: 40px;"><i>laticarpa </i>Telenga, 1955</p>							England, Ireland
40009	Animalia		Arthropoda			Insecta			Hymenoptera			Ichneumonoidea	Braconidae	Agathidinae	Agathidini		Agathis		lugubris				(Förster, 1863)	<p style="margin-left: 40px;"><i>Cenostomus lugubris </i>Förster, 1863</p><p style="margin-left: 40px;"><i>minuta </i>Niezabitowski, 1910</p>							England, Scotland, Wales, Ireland		added by Nixon (1986)
40010	Animalia		Arthropoda			Insecta			Hymenoptera			Ichneumonoidea	Braconidae	Agathidinae	Agathidini		Agathis		montana				Shestakov, 1932	<p style="margin-left: 40px;"><i>zaykovi </i>Nixon, 1986</p>							England		added by Simbolotti &amp; van Achterberg (1999)
40011	Animalia		Arthropoda			Insecta			Hymenoptera			Ichneumonoidea	Braconidae	Agathidinae	Agathidini		Agathis		nigra				Nees, 1812	<p style="margin-left: 40px;"><i>testaceipes </i>Fischer, 1957</p><p style="margin-left: 40px;"><i>kasachstanica </i>Tobias, 1963</p><p style="margin-left: 40px;"><i>nixoni </i>Belokobylskij &amp; Jervis, 1998</p>							England
40012	Animalia		Arthropoda			Insecta			Hymenoptera			Ichneumonoidea	Braconidae	Agathidinae	Agathidini		Agathis		rufipalpis				Nees, 1812								Ireland
40013	Animalia		Arthropoda			Insecta			Hymenoptera			Ichneumonoidea	Braconidae	Agathidinae	Agathidini		Agathis		tibialis				Nees, 1814	<p style="margin-left: 40px;"><i>genualis </i>Marshall, 1898</p>							England		NMS, det. van Achterberg, added here
40014	Animalia		Arthropoda			Insecta			Hymenoptera			Ichneumonoidea	Braconidae	Agathidinae	Agathidini		Agathis		varipes				Thomson, 1895	<p style="margin-left: 40px;"><i>simulatrix </i>Kokujev, 1895</p><p style="margin-left: 40px;"><i>rufipes </i>Ivanov, 1899</p><p style="margin-left: 40px;"><i>dissimilis </i>Shestakov, 1928</p><p style="margin-left: 40px;"><i>rufilabialis </i>Fahringer, 1937</p><p style="margin-left: 40px;"><i>glabricollis </i>Telenga, 1957</p><p style="margin-left: 40px;"><i>serratulae </i>Tobias, 1963</p><p sty…							England		added by Nixon (1986)
40015	Animalia		Arthropoda			Insecta			Hymenoptera			Ichneumonoidea	Braconidae	Agathidinae	Agathidini		Bassus						Fabricius, 1804	<p style="margin-left: 40px;"><i>Microdus </i>Nees, 1814</p><p style="margin-left: 40px;"><i>DIPLOZON </i>Haliday, 1833</p><p style="margin-left: 40px;"><i>Euryzona </i>Haliday, 1838 nom. nud.</p><p style="margin-left: 40px;"><i>Eumicrodus </i>Förster, 1863</p><p style="margin-left: 40px;"><i>HEMIOGASTER </i>Enderlein, 1920</p>									Following molecular phylogenetic analysis of Agathidinae (Sharkey et al., 2006), the genus Bassus s.l. was recognised as being a polyphyletic assemblage. Species are now being described in or reassigned to Lytopylus, Thermophilus and the non-British Camptothlipsis (Sharkey et al., 2009; Stevens et al., 2010, 2011; van Achterberg &amp; Long, 2010; van Achterberg, 2011) but very few European specie…
40016	Animalia		Arthropoda			Insecta			Hymenoptera			Ichneumonoidea	Braconidae	Agathidinae	Agathidini		Bassus		calculator				(Fabricius, 1798)	<p style="margin-left: 40px;"><i>Ichneumon calculator </i>Fabricius, 1798</p><p style="margin-left: 40px;"><i>abscissus </i>(Ratzeburg, 1844, <i>Microdus </i>)</p>							England
40017	Animalia		Arthropoda			Insecta			Hymenoptera			Ichneumonoidea	Braconidae	Agathidinae	Agathidini		Earinus						Wesmael, 1837	<p style="margin-left: 40px;"><i> </i>Förster, 1863</p>
40018	Animalia		Arthropoda			Insecta			Hymenoptera			Ichneumonoidea	Braconidae	Agathidinae	Agathidini		Earinus		elator				(Fabricius, 1804)	<p style="margin-left: 40px;"><i>Banchus elator </i>Fabricius, 1804</p><p style="margin-left: 40px;"><i>nitidulus </i>(Nees, 1814, <i>Microdus </i>)</p><p style="margin-left: 40px;"><i>thoracicus </i>(Nees, 1834, <i>Microdus </i>)</p><p style="margin-left: 40px;"><i>major </i>(Fonscolombe, 1846, <i>Agathis </i>)</p><p style="margin-left: 40px;"><i>pilosus </i>Tobias, 1960</p>							England, Scotland, Ireland
40019	Animalia		Arthropoda			Insecta			Hymenoptera			Ichneumonoidea	Braconidae	Agathidinae	Agathidini		Earinus		gloriatorius				(Panzer, 1809)	<p style="margin-left: 40px;"><i>Bassus gloriatorius </i>Panzer, 1809</p><p style="margin-left: 40px;"><i>gloriator </i>(Nees, 1812, <i>Microdus </i>)</p><p style="margin-left: 40px;"><i>ochropes </i>(Curtis, 1829, <i>Microdus </i>) nom. nud.</p><p style="margin-left: 40px;"><i>affinis </i>(Wesmael, 1837, <i>Microdus </i>)</p><p style="margin-left: 40px;"><i>delusor </i>(Wesmael, 1837, <i>Microdu…							England, Scotland, Ireland, Isle of Man
40020	Animalia		Arthropoda			Insecta			Hymenoptera			Ichneumonoidea	Braconidae	Agathidinae	Agathidini		Earinus		transversus				Lyle, 1920								England		distribution data from Shaw (2005)
40021	Animalia		Arthropoda			Insecta			Hymenoptera			Ichneumonoidea	Braconidae	Agathidinae	Agathidini		Lytopylus						Förster, 1863	<p style="margin-left: 40px;"><i>AEROPHILUS </i>Szépligeti, 1902</p><p style="margin-left: 40px;"><i>NEOMICRODUS </i>Szépligeti, 1908</p><p style="margin-left: 40px;"><i>AEROPHILOPSIS </i>Viereck, 1913</p><p style="margin-left: 40px;"><i>AEROPHILINA </i>Enderlein, 1920</p><p style="margin-left: 40px;"><i>IOXIA </i>Enderlein, 1920</p><p style="margin-left: 40px;"><i>HORMAGATHIS </i>Brues, 1926</p>…									See comments under Bassus; generic synonymy from Sharkey et al. (2009).
40022	Animalia		Arthropoda			Insecta			Hymenoptera			Ichneumonoidea	Braconidae	Agathidinae	Agathidini		Lytopylus		rufipes				(Nees, 1814)	<p style="margin-left: 40px;"><i>Microdus rufipes </i>Nees, 1814</p><p style="margin-left: 40px;"><i>germanicus </i>(Enderlein, 1904, <i>Braunsia </i>)</p><p style="margin-left: 40px;"><i>diversus </i>Muesebeck, 1933</p><p style="margin-left: 40px;"><i>amurensis </i>(Shestakov, 1940, <i>Microdus </i>)</p>							England
40023	Animalia		Arthropoda			Insecta			Hymenoptera			Ichneumonoidea	Braconidae	Agathidinae	Agathidini		Therophilus						Wesmael, 1837	<p style="margin-left: 40px;"><i>ORGILONEURA </i>Ashmead, 1900</p><p style="margin-left: 40px;"><i>Agathiella </i>Szépligeti, 1902</p><p style="margin-left: 40px;"><i>AEROPHILIODES </i>Strand, 1911</p>									See comments under Bassus; generic synonymy from Sharkey et al. (2009). Species excluded from the British and Irish list: [brevicaudis (Reinhard, 1867, Microdus) ] Listed as a ‘species inquirendae’ by Nixon (1986) but included as a German species by Simbolotti &amp; van Achterberg (1992). Transferred to Bassus by Simbolotti &amp; van Achterberg (1999) but not listed as a species of Therophilus by…
40024	Animalia		Arthropoda			Insecta			Hymenoptera			Ichneumonoidea	Braconidae	Agathidinae	Agathidini		Therophilus		arcuatus				(Reinhard, 1867)	<p style="margin-left: 40px;"><i>Microdus arcuatus </i>Reinhard, 1867</p>									Taken out of synonymy with conspicuus by Simbolotti &amp; van Achterberg (1992).
40025	Animalia		Arthropoda			Insecta			Hymenoptera			Ichneumonoidea	Braconidae	Agathidinae	Agathidini		Therophilus		cingulipes				(Nees, 1812)	<p style="margin-left: 40px;"><i>Microdus cingulipes </i>Nees, 1812</p><p style="margin-left: 40px;"><i>nantouensis </i>Chou &amp; Sharkey, 1989</p>							England, Ireland
40026	Animalia		Arthropoda			Insecta			Hymenoptera			Ichneumonoidea	Braconidae	Agathidinae	Agathidini		Therophilus		clausthalianus				(Ratzeburg, 1844)	<p style="margin-left: 40px;"><i>Ichneumon clausthalianus </i>Ratzeburg, 1844</p>							England, Ireland
40027	Animalia		Arthropoda			Insecta			Hymenoptera			Ichneumonoidea	Braconidae	Agathidinae	Agathidini		Therophilus		conspicuus				(Wesmael, 1837)	<p style="margin-left: 40px;"><i>Microdus conspicuus </i>Wesmael, 1837</p><p style="margin-left: 40px;"><i>zonatus </i>(Marshall, 1885, <i>Earinus </i>)</p><p style="margin-left: 40px;"><i>carpocapsae </i>Cushman, 1915</p><p style="margin-left: 40px;"><i>angustatus </i>(Telenga, 1955, <i>Microdus </i>)</p><p style="margin-left: 40px;"><i>variabilis </i>Chou &amp; Sharkey, 1989</p>							England, Ireland
40028	Animalia		Arthropoda			Insecta			Hymenoptera			Ichneumonoidea	Braconidae	Agathidinae	Agathidini		Therophilus		tegularis				(Thomson, 1895)	<p style="margin-left: 40px;"><i>Agathis tegularis </i>Thomson, 1895</p>							England		added by Simbolotti &amp; van Achterberg (1992)
40029	Animalia		Arthropoda			Insecta			Hymenoptera			Ichneumonoidea	Braconidae	Agathidinae	Agathidini		Therophilus		tumidulus				(Nees, 1812)	<p style="margin-left: 40px;"><i>Microdus tumidulus </i>Nees, 1812</p><p style="margin-left: 40px;"><i>intermedius </i>(Ivanov, 1899, <i>Eumicrodus </i>)</p><p style="margin-left: 40px;"><i>annae </i>(Enderlein, 1908, <i>Microdus </i>)</p><p style="margin-left: 40px;"><i>aino </i>(Watanabe, 1937, <i>Microdus </i>)</p><p style="margin-left: 40px;"><i>ruficoxis </i>(Fahringer, 1937, <i>Microdus </i…							England, Scotland, Ireland
40030	Animalia		Arthropoda			Insecta			Hymenoptera			Ichneumonoidea	Braconidae	Agathidinae	Agathidini		?Therophilus						Wesmael, 1837										species incertae sedis within Agathidinae; Sharkey &amp; Stoelb (2012) defined Therophilus as a monophyletic genus and listed the included species, but several species currently classified in Therophilus are of uncertain generic placement.
40031	Animalia		Arthropoda			Insecta			Hymenoptera			Ichneumonoidea	Braconidae	Agathidinae	Agathidini		?Therophilus		dimidiator				(Nees, 1834)	<p style="margin-left: 40px;"><i>Microdus dimidiator </i>Nees, 1834</p><p style="margin-left: 40px;"><i>cingulator </i>(Ratzeburg, 1852, <i>Microdus </i>)</p><p style="margin-left: 40px;"><i>laticinctus </i>(Cresson, 1873, <i>Microdus </i>)</p><p style="margin-left: 40px;"><i>ocellanae </i>(Richardson, 1913, <i>Microdus </i>)</p>							England		Listed by Huddleston (1978) but no mention of British specimens by Nixon (1986), who states, however, that the traditional interpretation of the species is probably correct. No British or Irish specimens were seen by Simbolotti &amp; van Achterberg (1992) but van Achterberg has identified an English specimen in BMNH as Therophilus dimidiator.
40032	Animalia		Arthropoda			Insecta			Hymenoptera			Ichneumonoidea	Braconidae	Agathidinae	Agathidini		?Therophilus		epinotiae				(van Achterberg, 1992)	<p style="margin-left: 40px;"><i>Bassus epinotiae </i>van Achterberg, 1992</p>							England		added by Simbolotti &amp; van Achterberg (1992)
40033	Animalia		Arthropoda			Insecta			Hymenoptera			Ichneumonoidea	Braconidae	Agathidinae	Agathidini		?Therophilus		linguarius				(Nees, 1812)	<p style="margin-left: 40px;"><i>Microdus linguarius </i>Nees, 1812</p><p style="margin-left: 40px;"><i>minor </i>(Enderlein, 1908, <i>Microdus </i>)</p><p style="margin-left: 40px;"><i>kaszabi </i>(Papp, 1967, <i>Vipio </i>)</p>							England
40034	Animalia		Arthropoda			Insecta			Hymenoptera			Ichneumonoidea	Braconidae	Agathidinae	Agathidini		?Therophilus		mediator				(Nees, 1814)	<p style="margin-left: 40px;"><i>Microdus mediator </i>Nees, 1814</p><p style="margin-left: 40px;"><i>lugubrator </i>(Ratzeburg, 1852, <i>Microdus </i>)</p>							England		Transferred from Agathis by Simbolotti &amp; van Achterberg (1999).
40035	Animalia		Arthropoda			Insecta			Hymenoptera			Ichneumonoidea	Braconidae	Agathidinae	Agathidini		?Therophilus		pumilus				(Ratzeburg, 1844)	<p style="margin-left: 40px;"><i>Microdus pumilus </i>Ratzeburg, 1844</p>							England		NMS, det. Shaw, added here; listed by Huddleston (1978) but no mention of British specimens by Nixon (1986) or Simbolotti &amp; van Achterberg (1992). Transferred from Agathis by Simbolotti &amp; van Achterberg (1999) but listed as a species of Agathis in Taxapad.
40036	Animalia		Arthropoda			Insecta			Hymenoptera			Ichneumonoidea	Braconidae	Agathidinae	Agathidini		?Therophilus		rugulosus				(Nees, 1834)	<p style="margin-left: 40px;"><i>Microdus rugulosus </i>Nees, 1834</p><p style="margin-left: 40px;"><i>compeditus </i>(Vollenhoven, 1878, <i>Microdus </i>)</p><p style="margin-left: 40px;"><i>punctatus </i>(Abdinbekova, 1975, <i>Microdus </i>)</p>							England, Ireland
40037	Animalia		Arthropoda			Insecta			Hymenoptera			Ichneumonoidea	Braconidae	Alysiinae									Leach, 1815
40038	Animalia		Arthropoda			Insecta			Hymenoptera			Ichneumonoidea	Braconidae	Alysiinae	Alysiini								Leach, 1815	<p style="margin-left: 40px;"><i>ALLOEINI </i>Ashmead, 1900</p>
40039	Animalia		Arthropoda			Insecta			Hymenoptera			Ichneumonoidea	Braconidae	Alysiinae	Alysiini		Adelurola						Strand, 1928	<p style="margin-left: 40px;"><i>Adelura </i>Förster, 1863 preocc.</p><p style="margin-left: 40px;"><i>Neocarpa </i>Fischer, 1966</p>
40040	Animalia		Arthropoda			Insecta			Hymenoptera			Ichneumonoidea	Braconidae	Alysiinae	Alysiini		Adelurola		florimela				(Haliday, 1838)	<p style="margin-left: 40px;"><i>Alysia florimela </i>Haliday, 1838</p><p style="margin-left: 40px;"><i>multiarticulata </i>(Marshall, 1898, <i>Phaenocarpa </i>)</p><p style="margin-left: 40px;"><i>pentapleuroides </i>(Fischer, 1971, <i>Dapsilarthra </i>) unavailable</p>							England, Scotland, Ireland, Isle of Man
40041	Animalia		Arthropoda			Insecta			Hymenoptera			Ichneumonoidea	Braconidae	Alysiinae	Alysiini		Alloea						Haliday, 1833	<p style="margin-left: 40px;"><i>DIASPASTA </i>Förster, 1863</p><p style="margin-left: 40px;"><i>LAMADATHA </i>Cameron, 1900</p>
40042	Animalia		Arthropoda			Insecta			Hymenoptera			Ichneumonoidea	Braconidae	Alysiinae	Alysiini		Alloea		contracta				Haliday, 1833	<p style="margin-left: 40px;"><i>testaceipes </i>(Cameron, 1900, <i>Lamadatha </i>)</p>							England, Scotland, Wales, Ireland
40043	Animalia		Arthropoda			Insecta			Hymenoptera			Ichneumonoidea	Braconidae	Alysiinae	Alysiini		Alloea		lonchopterae				Fischer, 1966								Isle of Man		added by Godfray &amp; Bland (2011)
40044	Animalia		Arthropoda			Insecta			Hymenoptera			Ichneumonoidea	Braconidae	Alysiinae	Alysiini		Alysia						Latreille, 1804
40045	Animalia		Arthropoda			Insecta			Hymenoptera			Ichneumonoidea	Braconidae	Alysiinae	Alysiini		Alysia	Alysia					Latreille, 1804	<p style="margin-left: 40px;"><i>CECHENUS </i>Illiger, 1807</p><p style="margin-left: 40px;"><i>BASSUS </i>Nees, 1812</p><p style="margin-left: 40px;"><i>GONIARCHA </i>Förster, 1863</p><p style="margin-left: 40px;"><i>STROPHAEA </i>Förster, 1863</p>									Much of the taxonomy and distribution from Wharton (1986). Species of Alysia (Alysia) excluded from the British and Irish list: [cingulata Nees, 1834 nom. dub.]
40046	Animalia		Arthropoda			Insecta			Hymenoptera			Ichneumonoidea	Braconidae	Alysiinae	Alysiini		Alysia	Alysia	alticola				(Ashmead, 1890)	<p style="margin-left: 40px;"><i>Pentapleura alticola </i>Ashmead, 1890</p><p style="margin-left: 40px;"><i>soror </i>Marshall, 1894</p>							England, Scotland, Wales, Isle of Man
40047	Animalia		Arthropoda			Insecta			Hymenoptera			Ichneumonoidea	Braconidae	Alysiinae	Alysiini		Alysia	Alysia	frigida				Haliday, 1838								England		added by Godfray &amp; van Achterberg (2015)
40048	Animalia		Arthropoda			Insecta			Hymenoptera			Ichneumonoidea	Braconidae	Alysiinae	Alysiini		Alysia	Alysia	incongrua				Nees, 1834								England, Scotland, Ireland
40049	Animalia		Arthropoda			Insecta			Hymenoptera			Ichneumonoidea	Braconidae	Alysiinae	Alysiini		Alysia	Alysia	lucia				Haliday, 1838	<p style="margin-left: 40px;"><i>diversiceps </i>Fischer, 1967</p>							Scotland
40050	Animalia		Arthropoda			Insecta			Hymenoptera			Ichneumonoidea	Braconidae	Alysiinae	Alysiini		Alysia	Alysia	lucicola				Haliday, 1838								England, Scotland, Ireland
40051	Animalia		Arthropoda			Insecta			Hymenoptera			Ichneumonoidea	Braconidae	Alysiinae	Alysiini		Alysia	Alysia	luciella				Stelfox, 1941								Ireland
40052	Animalia		Arthropoda			Insecta			Hymenoptera			Ichneumonoidea	Braconidae	Alysiinae	Alysiini		Alysia	Alysia	manducator				(Panzer, 1799)	<p style="margin-left: 40px;"><i>Ichneumon manducator </i>Panzer, 1799</p><p style="margin-left: 40px;"><i>haematopa </i>(Gmelin, 1790, <i>Ichneumon </i>) preocc.</p><p style="margin-left: 40px;"><i>stercoraria </i>Latreille, 1805</p><p style="margin-left: 40px;"><i>apicalis </i>Curtis, 1826</p><p style="margin-left: 40px;"><i>similis </i>Curtis, 1826</p><p style="margin-left: 40px;"><i>stercorat…							England, Scotland, Wales, Ireland, Isle of Man
40053	Animalia		Arthropoda			Insecta			Hymenoptera			Ichneumonoidea	Braconidae	Alysiinae	Alysiini		Alysia	Alysia	truncator				(Nees, 1812)	<p style="margin-left: 40px;"><i>Bassus truncator </i>Nees, 1812</p>							England, Scotland, Ireland
40054	Animalia		Arthropoda			Insecta			Hymenoptera			Ichneumonoidea	Braconidae	Alysiinae	Alysiini		Alysia	Anarcha					Förster, 1863										Much of the taxonomy and distribution from Wharton (1988b). Species of Alysia (Anarcha) excluded from the British and Irish list: [similis (Nees, 1812, Bassus) nom. dub.]
40055	Animalia		Arthropoda			Insecta			Hymenoptera			Ichneumonoidea	Braconidae	Alysiinae	Alysiini		Alysia	Anarcha	atra				Haliday, 1838								Ireland
40056	Animalia		Arthropoda			Insecta			Hymenoptera			Ichneumonoidea	Braconidae	Alysiinae	Alysiini		Alysia	Anarcha	fuscipennis				Haliday, 1838	<p style="margin-left: 40px;"><i>obscuripes </i>Thomson, 1895</p>							England, Scotland, Ireland
40057	Animalia		Arthropoda			Insecta			Hymenoptera			Ichneumonoidea	Braconidae	Alysiinae	Alysiini		Alysia	Anarcha	mandibulator				(Nees, 1812)	<p style="margin-left: 40px;"><i>Bassus mandibulator </i>Nees, 1812</p><p style="margin-left: 40px;"><i>loripes </i>Haliday, 1838</p><p style="margin-left: 40px;"><i>mandibulatrix </i>Schulz, 1906</p>							England, Ireland
40058	Animalia		Arthropoda			Insecta			Hymenoptera			Ichneumonoidea	Braconidae	Alysiinae	Alysiini		Alysia	Anarcha	rufidens				Nees, 1834	<p style="margin-left: 40px;"><i>puncticollis </i>Thomson, 1895</p>							England, Ireland
40059	Animalia		Arthropoda			Insecta			Hymenoptera			Ichneumonoidea	Braconidae	Alysiinae	Alysiini		Alysia	Anarcha	sophia				Haliday, 1835								Ireland
40060	Animalia		Arthropoda			Insecta			Hymenoptera			Ichneumonoidea	Braconidae	Alysiinae	Alysiini		Alysia	Anarcha	subaperta				Thomson, 1895	<p style="margin-left: 40px;"><i>similis </i>misident.</p>							England		added by Wharton (1988b)
40061	Animalia		Arthropoda			Insecta			Hymenoptera			Ichneumonoidea	Braconidae	Alysiinae	Alysiini		Alysia	Anarcha	thapsina				Wharton, 1988								Ireland		added by Wharton (1988b)
40062	Animalia		Arthropoda			Insecta			Hymenoptera			Ichneumonoidea	Braconidae	Alysiinae	Alysiini		Alysia	Anarcha	tipulae				(Scopoli, 1763)	<p style="margin-left: 40px;"><i>Ichneumon tipulae </i>Scopoli, 1763</p><p style="margin-left: 40px;"><i>abdominator </i>(Nees, 1814, <i>Bassus </i>)</p><p style="margin-left: 40px;"><i>notabilis </i>(Förster, 1863, <i>Anarcha </i>)</p>							England, Scotland, Ireland
40063	Animalia		Arthropoda			Insecta			Hymenoptera			Ichneumonoidea	Braconidae	Alysiinae	Alysiini		Alysia	Anarcha	umbrata				Stelfox, 1941								Ireland
40064	Animalia		Arthropoda			Insecta			Hymenoptera			Ichneumonoidea	Braconidae	Alysiinae	Alysiini		Anisocyrta						Förster, 1863
40065	Animalia		Arthropoda			Insecta			Hymenoptera			Ichneumonoidea	Braconidae	Alysiinae	Alysiini		Anisocyrta		perdita				(Haliday, 1838)	<p style="margin-left: 40px;"><i>Alysia perdita </i>Haliday, 1838</p>							Scotland
40066	Animalia		Arthropoda			Insecta			Hymenoptera			Ichneumonoidea	Braconidae	Alysiinae	Alysiini		Aphaereta						Förster, 1863	<p style="margin-left: 40px;"><i>TRICHESIA </i>Provancher, 1880</p><p style="margin-left: 40px;"><i>TRINARIA </i>Provancher, 1886</p><p style="margin-left: 40px;"><i>APHAERETE </i>Dalla Torre, 1898</p><p style="margin-left: 40px;"><i>ATOPANDRIUM </i>Graham, 1952</p><p style="margin-left: 40px;"><i>TRISYNALDIS </i>Fischer, 1958</p>
40067	Animalia		Arthropoda			Insecta			Hymenoptera			Ichneumonoidea	Braconidae	Alysiinae	Alysiini		Aphaereta		debilitata				Morley, 1933	<p style="margin-left: 40px;"><i>loripenne </i>(Graham, 1952, <i>Atopandrium </i>)</p><p style="margin-left: 40px;"><i>confluctum </i>(Fischer, 1958, <i>Trisynaldis </i>)</p>							England, Wales
40068	Animalia		Arthropoda			Insecta			Hymenoptera			Ichneumonoidea	Braconidae	Alysiinae	Alysiini		Aphaereta		falcigera				Graham, 1960								England, Ireland
40069	Animalia		Arthropoda			Insecta			Hymenoptera			Ichneumonoidea	Braconidae	Alysiinae	Alysiini		Aphaereta		major				(Thomson, 1895)	<p style="margin-left: 40px;"><i>Alysia major </i>Thomson, 1895</p><p style="margin-left: 40px;"><i>major </i>Marshall, 1898 preocc.</p>							England, Scotland, Ireland
40070	Animalia		Arthropoda			Insecta			Hymenoptera			Ichneumonoidea	Braconidae	Alysiinae	Alysiini		Aphaereta		minuta				(Nees, 1811)	<p style="margin-left: 40px;"><i>Stephanus minutus </i>Nees, 1811</p><p style="margin-left: 40px;"><i>cephalotes </i>(Haliday, 1833, <i>Alysia </i>)</p><p style="margin-left: 40px;"><i>fuscipes </i>(Nees, 1834, <i>Alysia </i>)</p><p style="margin-left: 40px;"><i>confluens </i>(Ratzeburg, 1844, <i>Alysia </i>)</p><p style="margin-left: 40px;"><i>stigmaticalis </i>(Thomson, 1895, <i>Alysia </i>)</p…							England, Scotland, Ireland
40071	Animalia		Arthropoda			Insecta			Hymenoptera			Ichneumonoidea	Braconidae	Alysiinae	Alysiini		Aphaereta		pallipes				(Say, 1829)	<p style="margin-left: 40px;"><i>Alysia pallipes </i>Say, 1829</p><p style="margin-left: 40px;"><i>auripes </i>(Provancher, 1881, <i>Trichesia </i>)</p><p style="margin-left: 40px;"><i>pilicornis </i>(Provancher, 1886, <i>Trinaria </i>)</p><p style="margin-left: 40px;"><i>californica </i>Ashmead, 1889</p><p style="margin-left: 40px;"><i>muscae </i>Ashmead, 1889</p><p style="margin-left: 40px;"><i…							England		added by Shaw (1983)
40072	Animalia		Arthropoda			Insecta			Hymenoptera			Ichneumonoidea	Braconidae	Alysiinae	Alysiini		Aphaereta		tenuicornis				Nixon, 1939								England, Wales, Ireland
40073	Animalia		Arthropoda			Insecta			Hymenoptera			Ichneumonoidea	Braconidae	Alysiinae	Alysiini		Asobara						Förster, 1863	<p style="margin-left: 40px;"><i>SPANISTA </i>Förster, 1863</p>
40074	Animalia		Arthropoda			Insecta			Hymenoptera			Ichneumonoidea	Braconidae	Alysiinae	Alysiini		Asobara		tabida				(Nees, 1834)	<p style="margin-left: 40px;"><i>Alysia tabida </i>Nees, 1834</p><p style="margin-left: 40px;"><i>anomala </i>(Thomson, 1895, <i>Alysia </i>)</p><p style="margin-left: 40px;"><i>crenulata </i>(Fahringer, 1935, <i>Phaenocarpa </i>)</p>							England, Ireland
40075	Animalia		Arthropoda			Insecta			Hymenoptera			Ichneumonoidea	Braconidae	Alysiinae	Alysiini		Aspilota						Förster, 1863	<p style="margin-left: 40px;"><i>DIPIESTA </i>Förster, 1863</p><p style="margin-left: 40px;"><i>EUSYNALDIS </i>Zaykov &amp; Fischer, 1982</p><p style="margin-left: 40px;"><i>SYNALDIS </i>misident.</p>									Some distribution data from Stelfox &amp; Graham (1951a). Some species treated as belonging to Dinotrema by other authors have been included in Aspilota in Taxapad and there is clearly much work to be done in allocating species to the current generic concepts (see Wharton, 1985). Munk (in prep.) is preparing a revision of the European species of Aspilota s.l. (see note under Dinotrema).
40076	Animalia		Arthropoda			Insecta			Hymenoptera			Ichneumonoidea	Braconidae	Alysiinae	Alysiini		Aspilota		acutidentata				(Fischer, 1970)	<p style="margin-left: 40px;"><i>Synaldis acutidentata </i>Fischer, 1970</p>							England, Scotland		NMS, BMNH, det. Munk, added here; identified by T. Munk as a species of Dinotrema.
40077	Animalia		Arthropoda			Insecta			Hymenoptera			Ichneumonoidea	Braconidae	Alysiinae	Alysiini		Aspilota		anaphoretica				Fischer, 1973								England, Scotland, Ireland		NMS, BMNH, det. Munk, added here
40078	Animalia		Arthropoda			Insecta			Hymenoptera			Ichneumonoidea	Braconidae	Alysiinae	Alysiini		Aspilota		blasii				Fischer, 1973								England		BMNH, det. Munk, added here
40079	Animalia		Arthropoda			Insecta			Hymenoptera			Ichneumonoidea	Braconidae	Alysiinae	Alysiini		Aspilota		compressiventris				Stelfox &amp; Graham, 1951								England
40080	Animalia		Arthropoda			Insecta			Hymenoptera			Ichneumonoidea	Braconidae	Alysiinae	Alysiini		Aspilota		curta				Marshall, 1895								England
40081	Animalia		Arthropoda			Insecta			Hymenoptera			Ichneumonoidea	Braconidae	Alysiinae	Alysiini		Aspilota		daemon				Stelfox and Graham, 1948								England, Scotland, Ireland
40082	Animalia		Arthropoda			Insecta			Hymenoptera			Ichneumonoidea	Braconidae	Alysiinae	Alysiini		Aspilota		delicata				Fischer, 1973								England, Scotland, Ireland		BMNH, det. Munk, added here
40083	Animalia		Arthropoda			Insecta			Hymenoptera			Ichneumonoidea	Braconidae	Alysiinae	Alysiini		Aspilota		efoveolata				Thomson, 1895	<p style="margin-left: 40px;"><i>pneumatica </i>Fischer, 1973</p>							England, Scotland, Wales		NMS, BMNH, det. Munk, added here
40084	Animalia		Arthropoda			Insecta			Hymenoptera			Ichneumonoidea	Braconidae	Alysiinae	Alysiini		Aspilota		flagellaris				Fischer, 1973								England, Scotland, Ireland		BMNH, det. Munk, added here
40085	Animalia		Arthropoda			Insecta			Hymenoptera			Ichneumonoidea	Braconidae	Alysiinae	Alysiini		Aspilota		fuscicornis				(Haliday, 1838)	<p style="margin-left: 40px;"><i>Alysia fuscicornis </i>Haliday, 1838</p><p style="margin-left: 40px;"><i>?minuta </i>(Nees, 1812, <i>Bassus </i>)</p><p style="margin-left: 40px;"><i>exile </i>(Ruthe, 1859, <i>Orthostigma </i>)</p><p style="margin-left: 40px;"><i>dilatata </i>(Thomson, 1895, <i>Alysia </i>)</p>							England, Scotland, Ireland
40086	Animalia		Arthropoda			Insecta			Hymenoptera			Ichneumonoidea	Braconidae	Alysiinae	Alysiini		Aspilota		globipes				(Fischer, 1962)	<p style="margin-left: 40px;"><i>Synaldis globipes </i>Fischer, 1962</p>							England, Scotland		NMS, BMNH, det. Munk, added here
40087	Animalia		Arthropoda			Insecta			Hymenoptera			Ichneumonoidea	Braconidae	Alysiinae	Alysiini		Aspilota		imparidens				Fischer, 1974								England, Scotland, Wales		NMS, BMNH, det. Munk, added here
40088	Animalia		Arthropoda			Insecta			Hymenoptera			Ichneumonoidea	Braconidae	Alysiinae	Alysiini		Aspilota		insolita				(Tobias, 1962)	<p style="margin-left: 40px;"><i>Orthostigma insolita </i>Tobias, 1962</p>							England, Ireland		BMNH, det. Munk, added here
40089	Animalia		Arthropoda			Insecta			Hymenoptera			Ichneumonoidea	Braconidae	Alysiinae	Alysiini		Aspilota		intermediana				Fischer, 1975								England		added by Notton (1991b)
40090	Animalia		Arthropoda			Insecta			Hymenoptera			Ichneumonoidea	Braconidae	Alysiinae	Alysiini		Aspilota		iocosipecta				Fischer, 1974								England, Scotland, Ireland		NMS, BMNH, det. Munk, added here
40091	Animalia		Arthropoda			Insecta			Hymenoptera			Ichneumonoidea	Braconidae	Alysiinae	Alysiini		Aspilota		macrops				Stelfox &amp; Graham, 1951								England, Ireland
40092	Animalia		Arthropoda			Insecta			Hymenoptera			Ichneumonoidea	Braconidae	Alysiinae	Alysiini		Aspilota		nidicola				Hedqvist, 1972								England		BMNH, det. Munk, added here
40093	Animalia		Arthropoda			Insecta			Hymenoptera			Ichneumonoidea	Braconidae	Alysiinae	Alysiini		Aspilota		pillerensis				Fischer, 1973								England		BMNH, det. Munk, added here
40094	Animalia		Arthropoda			Insecta			Hymenoptera			Ichneumonoidea	Braconidae	Alysiinae	Alysiini		Aspilota		ruficornis				(Nees, 1834)	<p style="margin-left: 40px;"><i>Alysia ruficornis </i>Nees, 1834</p>							England, Scotland, Wales, Ireland
40095	Animalia		Arthropoda			Insecta			Hymenoptera			Ichneumonoidea	Braconidae	Alysiinae	Alysiini		Aspilota		stenogaster				Stelfox &amp; Graham, 1951								England
40096	Animalia		Arthropoda			Insecta			Hymenoptera			Ichneumonoidea	Braconidae	Alysiinae	Alysiini		Aspilota		tetragona				Fischer, 1976								England, Scotland, Ireland		NMS, BMNH, det. Munk, added here
40097	Animalia		Arthropoda			Insecta			Hymenoptera			Ichneumonoidea	Braconidae	Alysiinae	Alysiini		Aspilota		vernalis				Stelfox &amp; Graham, 1951								England, Scotland, Ireland
40098	Animalia		Arthropoda			Insecta			Hymenoptera			Ichneumonoidea	Braconidae	Alysiinae	Alysiini		Chasmodon						Haliday, 1838
40099	Animalia		Arthropoda			Insecta			Hymenoptera			Ichneumonoidea	Braconidae	Alysiinae	Alysiini		Chasmodon		apterus				(Nees, 1812)	<p style="margin-left: 40px;"><i>Bassus apterus </i>Nees, 1812</p>							England, Scotland, Wales, Ireland, Isle of Man
40100	Animalia		Arthropoda			Insecta			Hymenoptera			Ichneumonoidea	Braconidae	Alysiinae	Alysiini		Cratospila						Förster, 1863	<p style="margin-left: 40px;"><i>HEDYLUS </i>Marshall, 1891</p>
40101	Animalia		Arthropoda			Insecta			Hymenoptera			Ichneumonoidea	Braconidae	Alysiinae	Alysiini		Cratospila		circe				(Haliday, 1838)	<p style="margin-left: 40px;"><i>Alysia circe </i>Haliday, 1838</p><p style="margin-left: 40px;"><i>habilis </i>(Marshall, 1891, <i>Hedylus </i>)</p><p style="margin-left: 40px;"><i>annellata </i>(Thomson, 1895, <i>Alysia </i>)</p>							England, Ireland
40102	Animalia		Arthropoda			Insecta			Hymenoptera			Ichneumonoidea	Braconidae	Alysiinae	Alysiini		Dapsilarthra						Förster, 1863										Dapsilarthra has been used in a very broad sense to include Adelurola, Mesocrina, Heterolexis and Grammospila, and in a more narrow sense to include the last two genera. Van Achterberg (2014) is followed here in according each generic rank.
40103	Animalia		Arthropoda			Insecta			Hymenoptera			Ichneumonoidea	Braconidae	Alysiinae	Alysiini		Dapsilarthra		apii				(Curtis, 1826)	<p style="margin-left: 40px;"><i>Alysia apii </i>Curtis, 1826</p><p style="margin-left: 40px;"><i>laevipectus </i>(Thomson, 1895, <i>Alysia </i>)</p><p style="margin-left: 40px;"><i>americana </i>(Brues, 1907, <i>Orthostigma </i>)</p>							England, Scotland, Ireland
40104	Animalia		Arthropoda			Insecta			Hymenoptera			Ichneumonoidea	Braconidae	Alysiinae	Alysiini		Dapsilarthra		sylvia				(Haliday, 1839)	<p style="margin-left: 40px;"><i>Alysia sylvia </i>Haliday, 1839</p><p style="margin-left: 40px;"><i>carpathica </i>van Achterberg, 1983</p>							England, Scotland, Ireland
40105	Animalia		Arthropoda			Insecta			Hymenoptera			Ichneumonoidea	Braconidae	Alysiinae	Alysiini		Dinotrema						Förster, 1863										Wharton (1980) summarises the arguments against recognition of the genus Synaldis; van Achterberg (1988) likewise notes that the genus is defined only by the absence of fore wing vein 2-SR, which is known to be intraspecifically variable (Wharton, 1980). Despite this, various authors attach great taxonomic weight to this venational character and maintain Synaldis as a valid genus (as reflected by…
40106	Animalia		Arthropoda			Insecta			Hymenoptera			Ichneumonoidea	Braconidae	Alysiinae	Alysiini		Dinotrema	Dinotrema					Förster, 1863	<p style="margin-left: 40px;"><i>Aspilota </i>misident.</p><p style="margin-left: 40px;"><i>Synaldis </i>Förster, 1863</p><p style="margin-left: 40px;"><i>Coloboma </i>Förster, 1863</p><p style="margin-left: 40px;"><i>Spanomeris </i>Förster, 1863</p><p style="margin-left: 40px;"><i>SCOTIONEURUS </i>Provancher, 1886</p><p style="margin-left: 40px;"><i>PTERUSA </i>Fischer, 1958</p><p style="margin-…
40107	Animalia		Arthropoda			Insecta			Hymenoptera			Ichneumonoidea	Braconidae	Alysiinae	Alysiini		Dinotrema	Dinotrema	aluum				(Stelfox &amp; Graham, 1950)	<p style="margin-left: 40px;"><i>Aspilota alua </i>Stelfox &amp; Graham, 1950</p><p style="margin-left: 40px;"><i>alva </i>misspelling</p>							Ireland
40108	Animalia		Arthropoda			Insecta			Hymenoptera			Ichneumonoidea	Braconidae	Alysiinae	Alysiini		Dinotrema	Dinotrema	alysiae				Munk &amp; Peris-Felipo, 2013								England		added by Munk et al. (2013)
40109	Animalia		Arthropoda			Insecta			Hymenoptera			Ichneumonoidea	Braconidae	Alysiinae	Alysiini		Dinotrema	Dinotrema	areolatum				(Stelfox &amp; Graham, 1950)	<p style="margin-left: 40px;"><i>Aspilota areolata </i>Stelfox &amp; Graham, 1950</p>							England, Scotland
40110	Animalia		Arthropoda			Insecta			Hymenoptera			Ichneumonoidea	Braconidae	Alysiinae	Alysiini		Dinotrema	Dinotrema	brevicorne				(Nees, 1814)	<p style="margin-left: 40px;"><i>Bassus brevicornis </i>Nees, 1814</p>							England
40111	Animalia		Arthropoda			Insecta			Hymenoptera			Ichneumonoidea	Braconidae	Alysiinae	Alysiini		Dinotrema	Dinotrema	brevissimicorne				(Stelfox &amp; Graham, 1948)	<p style="margin-left: 40px;"><i>Aspilota brevissimicornis </i>Stelfox &amp; Graham, 1948</p>							Scotland, Ireland
40112	Animalia		Arthropoda			Insecta			Hymenoptera			Ichneumonoidea	Braconidae	Alysiinae	Alysiini		Dinotrema	Dinotrema	compressum				(Haliday, 1838)	<p style="margin-left: 40px;"><i>Alysia compressa </i>Haliday, 1838</p>							England
40113	Animalia		Arthropoda			Insecta			Hymenoptera			Ichneumonoidea	Braconidae	Alysiinae	Alysiini		Dinotrema	Dinotrema	concinnum				(Haliday, 1838)	<p style="margin-left: 40px;"><i>Alysia concinna </i>Haliday, 1838</p><p style="margin-left: 40px;"><i>maximum </i>(Fischer, 1962, <i>Synaldis </i>)</p><p style="margin-left: 40px;"><i>tyrrhena </i>(Masi, 1933, <i>Aspilota </i>)</p>							England, Ireland		Synaldis maximum Fischer, 1962 has been treated as a junior synonym by König (1972) and subsequent authors but T. Munk (pers. comm.) regards this as a valid species of Dinotrema that may be found to occur in Britain.
40114	Animalia		Arthropoda			Insecta			Hymenoptera			Ichneumonoidea	Braconidae	Alysiinae	Alysiini		Dinotrema	Dinotrema	concolor				(Nees, 1812)	<p style="margin-left: 40px;"><i>Bassus concolor </i>Nees, 1812</p><p style="margin-left: 40px;"><i>distractum </i>(Ruthe, 1859, <i>Orthostigma </i>) unavailable</p>							England, Ireland
40115	Animalia		Arthropoda			Insecta			Hymenoptera			Ichneumonoidea	Braconidae	Alysiinae	Alysiini		Dinotrema	Dinotrema	crassicosta				(Thomson, 1895)	<p style="margin-left: 40px;"><i>Alysia crassicosta </i>Thomson, 1895</p>							Scotland		NMS, det. Munk, added here
40116	Animalia		Arthropoda			Insecta			Hymenoptera			Ichneumonoidea	Braconidae	Alysiinae	Alysiini		Dinotrema	Dinotrema	cratocera				(Thomson, 1895)	<p style="margin-left: 40px;"><i>Alysia cratocera </i>Thomson, 1895</p>							Scotland		BMNH, det. Munk, added here
40117	Animalia		Arthropoda			Insecta			Hymenoptera			Ichneumonoidea	Braconidae	Alysiinae	Alysiini		Dinotrema	Dinotrema	denticulatum				(Stelfox &amp; Graham, 1951)	<p style="margin-left: 40px;"><i>Aspilota denticulata </i>Stelfox &amp; Graham, 1951</p>							Ireland
40118	Animalia		Arthropoda			Insecta			Hymenoptera			Ichneumonoidea	Braconidae	Alysiinae	Alysiini		Dinotrema	Dinotrema	dimidiatum				(Thomson, 1895)	<p style="margin-left: 40px;"><i>Alysia dimidiata </i>Thomson, 1895</p>							England		BMNH, det. Munk, added here
40119	Animalia		Arthropoda			Insecta			Hymenoptera			Ichneumonoidea	Braconidae	Alysiinae	Alysiini		Dinotrema	Dinotrema	distractum				(Nees, 1834)	<p style="margin-left: 40px;"><i>Alysia distracta </i>Nees, 1834</p>
40120	Animalia		Arthropoda			Insecta			Hymenoptera			Ichneumonoidea	Braconidae	Alysiinae	Alysiini		Dinotrema	Dinotrema	divisum				(Stelfox &amp; Graham, 1950)	<p style="margin-left: 40px;"><i>Aspilota divisa </i>Stelfox &amp; Graham, 1950</p><p style="margin-left: 40px;"><i>?aureliae </i>(Fischer, 1973, <i>Aspilota </i>)</p>							England, Scotland, Ireland
40121	Animalia		Arthropoda			Insecta			Hymenoptera			Ichneumonoidea	Braconidae	Alysiinae	Alysiini		Dinotrema	Dinotrema	erythropum				Förster, 1863	<p style="margin-left: 40px;"><i>praecipuum </i>(Marshall, 1895, <i>Aspilota </i>)</p>							England, Wales, Ireland
40122	Animalia		Arthropoda			Insecta			Hymenoptera			Ichneumonoidea	Braconidae	Alysiinae	Alysiini		Dinotrema	Dinotrema	falsificum				(Stelfox &amp; Graham, 1950)	<p style="margin-left: 40px;"><i>Aspilota falsifica </i>Stelfox &amp; Graham, 1950</p>							Scotland, Ireland
40123	Animalia		Arthropoda			Insecta			Hymenoptera			Ichneumonoidea	Braconidae	Alysiinae	Alysiini		Dinotrema	Dinotrema	glabrum				(Stelfox &amp; Graham, 1951)	<p style="margin-left: 40px;"><i>Aspilota glabra </i>Stelfox &amp; Graham, 1951</p><p style="margin-left: 40px;"><i>venustum </i>(Tobias, 1962, <i>Aspilota </i>)</p>							England, Scotland, Ireland
40124	Animalia		Arthropoda			Insecta			Hymenoptera			Ichneumonoidea	Braconidae	Alysiinae	Alysiini		Dinotrema	Dinotrema	insidiatrix				(Marshall, 1895)	<p style="margin-left: 40px;"><i>Aspilota insidiatrix </i>Marshall, 1895</p>							England
40125	Animalia		Arthropoda			Insecta			Hymenoptera			Ichneumonoidea	Braconidae	Alysiinae	Alysiini		Dinotrema	Dinotrema	insignis				(Stelfox &amp; Graham, 1950)	<p style="margin-left: 40px;"><i>Aspilota insignis </i>Stelfox &amp; Graham, 1950</p>							England
40126	Animalia		Arthropoda			Insecta			Hymenoptera			Ichneumonoidea	Braconidae	Alysiinae	Alysiini		Dinotrema	Dinotrema	iuxtanaeviam				(Fischer, 1978)	<p style="margin-left: 40px;"><i>Aspilota iuxtanaeviam </i>Fischer, 1978</p>							England		added by Fischer (1978)
40127	Animalia		Arthropoda			Insecta			Hymenoptera			Ichneumonoidea	Braconidae	Alysiinae	Alysiini		Dinotrema	Dinotrema	jaculans				(Haliday, 1838)	<p style="margin-left: 40px;"><i>Alysia jaculans </i>Haliday, 1838</p>							England, Scotland, Ireland
40128	Animalia		Arthropoda			Insecta			Hymenoptera			Ichneumonoidea	Braconidae	Alysiinae	Alysiini		Dinotrema	Dinotrema	latistigma				(Fischer, 1962)	<p style="margin-left: 40px;"><i>Synaldis latistigma </i>Fischer, 1962</p>							England		NMS, det. Munk, added here; Treated as a species of Eudinostigma in Fauna Europaea and Taxapad (Yu et al., 2012).
40129	Animalia		Arthropoda			Insecta			Hymenoptera			Ichneumonoidea	Braconidae	Alysiinae	Alysiini		Dinotrema	Dinotrema	lineola				(Thomson, 1895)	<p style="margin-left: 40px;"><i>Alysia lineola </i>Thomson, 1895</p>							England
40130	Animalia		Arthropoda			Insecta			Hymenoptera			Ichneumonoidea	Braconidae	Alysiinae	Alysiini		Dinotrema	Dinotrema	liosoma				(Stelfox &amp; Graham,1951)	<p style="margin-left: 40px;"><i>Aspilota liosoma </i>Stelfox &amp; Graham,1951</p><p style="margin-left: 40px;"><i>caudatum </i>(Thomson, 1895, <i>Aspilota </i>) preocc.</p>
40131	Animalia		Arthropoda			Insecta			Hymenoptera			Ichneumonoidea	Braconidae	Alysiinae	Alysiini		Dinotrema	Dinotrema	mesocaudatum				van Achterberg, 1988								England		added by van Achterberg (1988b)
40132	Animalia		Arthropoda			Insecta			Hymenoptera			Ichneumonoidea	Braconidae	Alysiinae	Alysiini		Dinotrema	Dinotrema	microcera				(Thomson, 1895)	<p style="margin-left: 40px;"><i>Alysia microcera </i>Thomson, 1895</p>							England, Scotland, Wales, Ireland		BMNH, det. Munk, added here
40133	Animalia		Arthropoda			Insecta			Hymenoptera			Ichneumonoidea	Braconidae	Alysiinae	Alysiini		Dinotrema	Dinotrema	necrophilum				(Hedqvist, 1972)	<p style="margin-left: 40px;"><i>Aspilota necrophila </i>Hedqvist, 1972</p>							England		added by Disney &amp; Munk (2005); transferred from Aspilota by Disney &amp; Munk (2005)
40134	Animalia		Arthropoda			Insecta			Hymenoptera			Ichneumonoidea	Braconidae	Alysiinae	Alysiini		Dinotrema	Dinotrema	nervosum				(Haliday, 1833)	<p style="margin-left: 40px;"><i>Alysia nervosa </i>Haliday, 1833</p>							England, Scotland, Ireland
40135	Animalia		Arthropoda			Insecta			Hymenoptera			Ichneumonoidea	Braconidae	Alysiinae	Alysiini		Dinotrema	Dinotrema	pulvinatum				(Stelfox &amp; Graham, 1949)	<p style="margin-left: 40px;"><i>Aspilota pulvinata </i>Stelfox &amp; Graham, 1949</p>							England, Scotland, Wales, Ireland		Treated as a species of Eudinostigma in Fauna Europaea and Taxapad (Yu et al., 2012).
40136	Animalia		Arthropoda			Insecta			Hymenoptera			Ichneumonoidea	Braconidae	Alysiinae	Alysiini		Dinotrema	Dinotrema	ruficollis				(Stelfox &amp; Graham, 1950)	<p style="margin-left: 40px;"><i>Aspilota ruficollis </i>Stelfox &amp; Graham, 1950</p>							England, Ireland		Distribution data from van Achterberg (1988b).
40137	Animalia		Arthropoda			Insecta			Hymenoptera			Ichneumonoidea	Braconidae	Alysiinae	Alysiini		Dinotrema	Dinotrema	semicompressum				(Stelfox &amp; Graham, 1949)	<p style="margin-left: 40px;"><i>Aspilota semicompressa </i>Stelfox &amp; Graham, 1949</p><p style="margin-left: 40px;"><i>parapunctatum </i>(Fischer, 1976, <i>Aspilota </i>)</p>							England, Scotland, Ireland
40138	Animalia		Arthropoda			Insecta			Hymenoptera			Ichneumonoidea	Braconidae	Alysiinae	Alysiini		Dinotrema	Dinotrema	sphaerimembre				(Fischer, 1973)	<p style="margin-left: 40px;"><i>Aspilota sphaerimembris </i>Fischer, 1973</p>							Scotland		NMS, det. Munk, added here
40139	Animalia		Arthropoda			Insecta			Hymenoptera			Ichneumonoidea	Braconidae	Alysiinae	Alysiini		Dinotrema	Dinotrema	sternaulicum				(Fischer, 1973)	<p style="margin-left: 40px;"><i>Aspilota sternaulica </i>Fischer, 1973</p>							England, Scotland		NMS, det. Munk, added here
40140	Animalia		Arthropoda			Insecta			Hymenoptera			Ichneumonoidea	Braconidae	Alysiinae	Alysiini		Dinotrema	Dinotrema	tauricum				(Telenga, 1935)	<p style="margin-left: 40px;"><i>Aspilota taurica </i>Telenga, 1935</p>							England		added by van Achterberg (1988b)
40141	Animalia		Arthropoda			Insecta			Hymenoptera			Ichneumonoidea	Braconidae	Alysiinae	Alysiini		Dinotrema	Dinotrema	vesparum				(Stelfox, 1943)	<p style="margin-left: 40px;"><i>Aspilota vesparum </i>Stelfox, 1943</p>							England, Scotland
40142	Animalia		Arthropoda			Insecta			Hymenoptera			Ichneumonoidea	Braconidae	Alysiinae	Alysiini		Dinotrema	Dinotrema	vituperatum				(Fischer, 1974)	<p style="margin-left: 40px;"><i>Aspilota vituperata </i>Fischer, 1974</p>							England, Scotland		NMS, det. Munk, added here
40143	Animalia		Arthropoda			Insecta			Hymenoptera			Ichneumonoidea	Braconidae	Alysiinae	Alysiini		Dinotrema	Leptotrema					van Achterberg, 1988										Described as a separate genus by van Achterberg (1988b), who gives distribution data for the one included species; treated as a subgenus of Dinotrema by Wharton (2002)
40144	Animalia		Arthropoda			Insecta			Hymenoptera			Ichneumonoidea	Braconidae	Alysiinae	Alysiini		Dinotrema	Leptotrema	dentifemur				(Stelfox, 1943)	<p style="margin-left: 40px;"><i>Aspilota dentifemur </i>Stelfox, 1943</p>							England, Scotland, Ireland
40145	Animalia		Arthropoda			Insecta			Hymenoptera			Ichneumonoidea	Braconidae	Alysiinae	Alysiini		Dinotrema	Prosapha					Förster, 1863
40146	Animalia		Arthropoda			Insecta			Hymenoptera			Ichneumonoidea	Braconidae	Alysiinae	Alysiini		Dinotrema	Prosapha	speculum				(Haliday, 1838)	<p style="margin-left: 40px;"><i>Alysia speculum </i>Haliday, 1838</p><p style="margin-left: 40px;"><i>venustum </i>(Haliday, 1838, <i>Alysia </i>)</p>							England, Ireland
40147	Animalia		Arthropoda			Insecta			Hymenoptera			Ichneumonoidea	Braconidae	Alysiinae	Alysiini		Grammospila						Förster, 1863	<p style="margin-left: 40px;"><i>PARAORTHOSTIGMA </i>Königsmann, 1972</p>
40148	Animalia		Arthropoda			Insecta			Hymenoptera			Ichneumonoidea	Braconidae	Alysiinae	Alysiini		Grammospila		isabella				(Haliday, 1838)	<p style="margin-left: 40px;"><i>Alysia isabella </i>Haliday, 1838</p>							England, Scotland
40149	Animalia		Arthropoda			Insecta			Hymenoptera			Ichneumonoidea	Braconidae	Alysiinae	Alysiini		Grammospila		rufiventris				(Nees, 1812)	<p style="margin-left: 40px;"><i>Bassus rufiventris </i>Nees, 1812</p><p style="margin-left: 40px;"><i>flaviventris </i>(Haliday, 1838, <i>Alysia </i>)</p><p style="margin-left: 40px;"><i>ochrogaster </i>(Szépligeti, 1898, <i>Phaenocarpa </i>)</p><p style="margin-left: 40px;"><i>fuscula </i>Griffiths, 1968</p>							England, Scotland, Ireland, Isle of Man		Grammospila fuscula (Griffiths, 1968, Dapsilarthra) removed from synonymy by van Achterberg (2014).
40150	Animalia		Arthropoda			Insecta			Hymenoptera			Ichneumonoidea	Braconidae	Alysiinae	Alysiini		Heterolexis						Förster, 1863
40151	Animalia		Arthropoda			Insecta			Hymenoptera			Ichneumonoidea	Braconidae	Alysiinae	Alysiini		Heterolexis		balteata				(Thomson, 1895)	<p style="margin-left: 40px;"><i>Alysia balteata </i>Thomson, 1895</p>							England, Scotland, Wales, Ireland
40152	Animalia		Arthropoda			Insecta			Hymenoptera			Ichneumonoidea	Braconidae	Alysiinae	Alysiini		Heterolexis		dictynna				(Marshall, 1895)	<p style="margin-left: 40px;"><i>Adelura dictynna </i>Marshall, 1895</p>							England, Scotland, Ireland
40153	Animalia		Arthropoda			Insecta			Hymenoptera			Ichneumonoidea	Braconidae	Alysiinae	Alysiini		Idiasta						Förster, 1863	<p style="margin-left: 40px;"><i>EUPHAENOCARPA </i>Tobias, 1975</p>
40154	Animalia		Arthropoda			Insecta			Hymenoptera			Ichneumonoidea	Braconidae	Alysiinae	Alysiini		Idiasta		dichrocera				Königsmann, 1960								England		NMS, det. Shaw, added here
40155	Animalia		Arthropoda			Insecta			Hymenoptera			Ichneumonoidea	Braconidae	Alysiinae	Alysiini		Idiasta		maritima				(Haliday, 1838)	<p style="margin-left: 40px;"><i>Alysia maritima </i>Haliday, 1838</p>							England, Scotland, Ireland
40156	Animalia		Arthropoda			Insecta			Hymenoptera			Ichneumonoidea	Braconidae	Alysiinae	Alysiini		Idiasta		nephele				(Haliday, 1838)	<p style="margin-left: 40px;"><i>Alysia nephele </i>Haliday, 1838</p>							England, Scotland
40157	Animalia		Arthropoda			Insecta			Hymenoptera			Ichneumonoidea	Braconidae	Alysiinae	Alysiini		Mesocrina						Förster, 1863	<p style="margin-left: 40px;"><i>PSEUDOMESOCRINA </i>Königsmann, 1959</p>
40158	Animalia		Arthropoda			Insecta			Hymenoptera			Ichneumonoidea	Braconidae	Alysiinae	Alysiini		Mesocrina		indagatrix				Förster, 1863	<p style="margin-left: 40px;"><i>venatrix </i>Marshall, 1895</p>							England
40159	Animalia		Arthropoda			Insecta			Hymenoptera			Ichneumonoidea	Braconidae	Alysiinae	Alysiini		Orthostigma						Ratzeburg, 1844	<p style="margin-left: 40px;"><i>DELOCARPA </i>Förster, 1863</p><p style="margin-left: 40px;"><i>ISCHNOCARPA </i>Förster, 1863</p>
40160	Animalia		Arthropoda			Insecta			Hymenoptera			Ichneumonoidea	Braconidae	Alysiinae	Alysiini		Orthostigma		cratospilum				(Thompson, 1895)	<p style="margin-left: 40px;"><i>Alysia cratospila </i>Thompson, 1895</p>							England		added by Godfray &amp; van Achterberg (2015)
40161	Animalia		Arthropoda			Insecta			Hymenoptera			Ichneumonoidea	Braconidae	Alysiinae	Alysiini		Orthostigma		longicorne				Königsmann, 1969								Ireland
40162	Animalia		Arthropoda			Insecta			Hymenoptera			Ichneumonoidea	Braconidae	Alysiinae	Alysiini		Orthostigma		maculipes				(Haliday, 1838)	<p style="margin-left: 40px;"><i>Alysia maculipes </i>Haliday, 1838</p>							England, Ireland
40163	Animalia		Arthropoda			Insecta			Hymenoptera			Ichneumonoidea	Braconidae	Alysiinae	Alysiini		Orthostigma		pumilum				(Nees, 1834)	<p style="margin-left: 40px;"><i>Alysia pumila </i>Nees, 1834</p><p style="margin-left: 40px;"><i>flavipes </i>(Ratzeburg, 1844, <i>Aphidius </i>)</p><p style="margin-left: 40px;"><i>fulvipes </i>Rondani, 1876 nom. nud.</p><p style="margin-left: 40px;"><i>brunnipes </i>Ratzeburg, 1852</p><p style="margin-left: 40px;"><i>bruneipes </i>Dalla Torre, 1898</p>							England, Ireland
40164	Animalia		Arthropoda			Insecta			Hymenoptera			Ichneumonoidea	Braconidae	Alysiinae	Alysiini		Panerema						Förster, 1863										Distribution data from van Achterberg (1988b).
40165	Animalia		Arthropoda			Insecta			Hymenoptera			Ichneumonoidea	Braconidae	Alysiinae	Alysiini		Panerema		fulvicornis				(Haliday, 1838)	<p style="margin-left: 40px;"><i>Alysia fulvicornis </i>Haliday, 1838</p>							Wales, Ireland
40166	Animalia		Arthropoda			Insecta			Hymenoptera			Ichneumonoidea	Braconidae	Alysiinae	Alysiini		Panerema		inops				Förster, 1863								England, Wales, Ireland
40167	Animalia		Arthropoda			Insecta			Hymenoptera			Ichneumonoidea	Braconidae	Alysiinae	Alysiini		Pentapleura						Förster, 1863	<p style="margin-left: 40px;"><i>OPISENDEA </i>Förster, 1863</p><p style="margin-left: 40px;"><i>Gnathospila </i>Fischer, 1966</p>
40168	Animalia		Arthropoda			Insecta			Hymenoptera			Ichneumonoidea	Braconidae	Alysiinae	Alysiini		Pentapleura		angustula				(Haliday, 1838)	<p style="margin-left: 40px;"><i>Alysia angustula </i>Haliday, 1838</p><p style="margin-left: 40px;"><i>laevipleuris </i>(Tobias, 1962, <i>Aspilota </i>)</p>							England, Scotland, Ireland
40169	Animalia		Arthropoda			Insecta			Hymenoptera			Ichneumonoidea	Braconidae	Alysiinae	Alysiini		Pentapleura		fuliginosa				(Haliday, 1838)	<p style="margin-left: 40px;"><i>Alysia fuliginosa </i>Haliday, 1838</p><p style="margin-left: 40px;"><i>carinata </i>(Thomson, 1895, <i>Alysia </i>)</p>							England, Wales, Ireland
40170	Animalia		Arthropoda			Insecta			Hymenoptera			Ichneumonoidea	Braconidae	Alysiinae	Alysiini		Pentapleura		pumilio				(Nees, 1812)	<p style="margin-left: 40px;"><i>Bassus pumilio </i>Nees, 1812</p><p style="margin-left: 40px;"><i>triticaphis </i>(Fitch, 1861, <i>Toxares </i>)</p><p style="margin-left: 40px;"><i>mesocrinoides </i>Goidanich, 1936</p>							England, Scotland, Wales, Ireland
40171	Animalia		Arthropoda			Insecta			Hymenoptera			Ichneumonoidea	Braconidae	Alysiinae	Alysiini		Phaenocarpa						Förster, 1863										Some taxonomic and distribution data from van Achterberg (1997).
40172	Animalia		Arthropoda			Insecta			Hymenoptera			Ichneumonoidea	Braconidae	Alysiinae	Alysiini		Phaenocarpa	Homophyla					Förster, 1863										species of Phaenocarpa (Homophyla) excluded from the British and Irish list: [pegomyiae Marshall, 1898] Listed as British by Lyle (1933) but we have not seen any British or Irish specimens.
40173	Animalia		Arthropoda			Insecta			Hymenoptera			Ichneumonoidea	Braconidae	Alysiinae	Alysiini		Phaenocarpa	Homophyla	pullata				(Haliday, 1838)	<p style="margin-left: 40px;"><i>Alysia pullata </i>Haliday, 1838</p>							England, Ireland
40174	Animalia		Arthropoda			Insecta			Hymenoptera			Ichneumonoidea	Braconidae	Alysiinae	Alysiini		Phaenocarpa	Phaenocarpa					Förster, 1863	<p style="margin-left: 40px;"><i>Idiolexis </i>Förster, 1863</p><p style="margin-left: 40px;"><i>Mesothesis </i>Förster, 1863</p><p style="margin-left: 40px;"><i>SATHRA </i>Förster, 1863</p><p style="margin-left: 40px;"><i>ASYNAPHES </i>Provancher, 1886</p><p style="margin-left: 40px;"><i>Kahlia </i>Ashmead, 1900</p><p style="margin-left: 40px;"><i>HOLCALYSIA </i>Cameron, 1905</p><p style="margin…
40175	Animalia		Arthropoda			Insecta			Hymenoptera			Ichneumonoidea	Braconidae	Alysiinae	Alysiini		Phaenocarpa	Phaenocarpa	canaliculata				Stelfox, 1941								England, Ireland
40176	Animalia		Arthropoda			Insecta			Hymenoptera			Ichneumonoidea	Braconidae	Alysiinae	Alysiini		Phaenocarpa	Phaenocarpa	conspurcator				(Haliday, 1838)	<p style="margin-left: 40px;"><i>Alysia conspurcator </i>Haliday, 1838</p><p style="margin-left: 40px;"><i>arctica </i>(Thomson, 1895, <i>Alysia </i>)</p><p style="margin-left: 40px;"><i>tatrica </i>Niezabitowski, 1910</p><p style="margin-left: 40px;"><i>remota </i>Papp, 1981</p>							England, Scotland, Wales, Ireland
40177	Animalia		Arthropoda			Insecta			Hymenoptera			Ichneumonoidea	Braconidae	Alysiinae	Alysiini		Phaenocarpa	Phaenocarpa	eugenia				(Haliday, 1838)	<p style="margin-left: 40px;"><i>Alysia eugenia </i>Haliday, 1838</p><p style="margin-left: 40px;"><i>pectoralis </i>(Zetterstedt, 1838, <i>Alysia </i>)</p><p style="margin-left: 40px;"><i>orbicularis </i>Gurasashvilli, 1983</p>							England, Scotland, Ireland
40178	Animalia		Arthropoda			Insecta			Hymenoptera			Ichneumonoidea	Braconidae	Alysiinae	Alysiini		Phaenocarpa	Phaenocarpa	eunice				(Haliday, 1838)	<p style="margin-left: 40px;"><i>Alysia eunice </i>Haliday, 1838</p><p style="margin-left: 40px;"><i>nimia </i>Stelfox, 1941</p>							England, Wales, Ireland
40179	Animalia		Arthropoda			Insecta			Hymenoptera			Ichneumonoidea	Braconidae	Alysiinae	Alysiini		Phaenocarpa	Phaenocarpa	flavipes				(Haliday, 1838)	<p style="margin-left: 40px;"><i>Alysia flavipes </i>Haliday, 1838</p>							England, Ireland
40180	Animalia		Arthropoda			Insecta			Hymenoptera			Ichneumonoidea	Braconidae	Alysiinae	Alysiini		Phaenocarpa	Phaenocarpa	frequentator				(Zetterstedt, 1838)	<p style="margin-left: 40px;"><i>Alysia frequentator </i>Zetterstedt, 1838</p><p style="margin-left: 40px;"><i>frequentatrix </i>(Schulz, 1906, <i>Alysia </i>)</p>							Wales		added by Godfray &amp; van Achterberg (2015)
40181	Animalia		Arthropoda			Insecta			Hymenoptera			Ichneumonoidea	Braconidae	Alysiinae	Alysiini		Phaenocarpa	Phaenocarpa	galatea				(Haliday, 1838)	<p style="margin-left: 40px;"><i>Alysia galatea </i>Haliday, 1838</p>							Scotland, Ireland
40182	Animalia		Arthropoda			Insecta			Hymenoptera			Ichneumonoidea	Braconidae	Alysiinae	Alysiini		Phaenocarpa	Phaenocarpa	helophilae				van Achterberg, 1998								England		added by van Achterberg (1998)
40183	Animalia		Arthropoda			Insecta			Hymenoptera			Ichneumonoidea	Braconidae	Alysiinae	Alysiini		Phaenocarpa	Phaenocarpa	livida				(Haliday, 1838)	<p style="margin-left: 40px;"><i>Alysia livida </i>Haliday, 1838</p><p style="margin-left: 40px;"><i>debilis </i>(Förster, 1863, <i>Sathra </i>)</p>							England, Ireland
40184	Animalia		Arthropoda			Insecta			Hymenoptera			Ichneumonoidea	Braconidae	Alysiinae	Alysiini		Phaenocarpa	Phaenocarpa	luteipes				Stelfox, 1950								Ireland
40185	Animalia		Arthropoda			Insecta			Hymenoptera			Ichneumonoidea	Braconidae	Alysiinae	Alysiini		Phaenocarpa	Phaenocarpa	maria				(Haliday, 1838)	<p style="margin-left: 40px;"><i>Alysia maria </i>Haliday, 1838</p>							England, Ireland
40186	Animalia		Arthropoda			Insecta			Hymenoptera			Ichneumonoidea	Braconidae	Alysiinae	Alysiini		Phaenocarpa	Phaenocarpa	nina				(Haliday, 1838)	<p style="margin-left: 40px;"><i>Alysia nina </i>Haliday, 1838</p>							Scotland		Not listed in Huddleston (1978), although described from Scottish material (van Achterberg, 1998).
40187	Animalia		Arthropoda			Insecta			Hymenoptera			Ichneumonoidea	Braconidae	Alysiinae	Alysiini		Phaenocarpa	Phaenocarpa	notabilis				Stelfox, 1944								Scotland, Ireland
40188	Animalia		Arthropoda			Insecta			Hymenoptera			Ichneumonoidea	Braconidae	Alysiinae	Alysiini		Phaenocarpa	Phaenocarpa	picinervis				(Haliday, 1838)	<p style="margin-left: 40px;"><i>Alysia picinervis </i>Haliday, 1838</p><p style="margin-left: 40px;"><i>americana </i>Ashmead, 1889</p>							England, Scotland, Ireland
40189	Animalia		Arthropoda			Insecta			Hymenoptera			Ichneumonoidea	Braconidae	Alysiinae	Alysiini		Phaenocarpa	Phaenocarpa	pratellae				(Curtis, 1826)	<p style="margin-left: 40px;"><i>Alysia pratellae </i>Curtis, 1826</p><p style="margin-left: 40px;"><i>piceator </i>(Zetterstedt, 1838, <i>Alysia </i>)</p><p style="margin-left: 40px;"><i>psalliotae </i>Telenga, 1935 </p>							England, Scotland
40190	Animalia		Arthropoda			Insecta			Hymenoptera			Ichneumonoidea	Braconidae	Alysiinae	Alysiini		Phaenocarpa	Phaenocarpa	punctigera				(Haliday, 1838)	<p style="margin-left: 40px;"><i>Alysia punctigera </i>Haliday, 1838</p>							England, Ireland		Listed as a species of Idiolexis in Fauna Europaea.
40191	Animalia		Arthropoda			Insecta			Hymenoptera			Ichneumonoidea	Braconidae	Alysiinae	Alysiini		Phaenocarpa	Phaenocarpa	ruficeps				(Nees, 1812)	<p style="margin-left: 40px;"><i>Bassus ruficeps </i>Nees, 1812</p><p style="margin-left: 40px;"><i>testacea </i>(Nees, 1812, <i>Bassus </i>)</p><p style="margin-left: 40px;"><i>gracilis </i>(Curtis, 1826, <i>Alysia </i>)</p><p style="margin-left: 40px;"><i>pallida </i>(Curtis, 1826, <i>Alysia </i>)</p><p style="margin-left: 40px;"><i>agricolator </i>(Zetterstedt, 1838, <i>Alysia </i>)</p><p styl…							England, Scotland, Wales, Ireland, Isle of Man
40192	Animalia		Arthropoda			Insecta			Hymenoptera			Ichneumonoidea	Braconidae	Alysiinae	Alysiini		Phaenocarpa	Phaenocarpa	tacita				Stelfox, 1941	<p style="margin-left: 40px;"><i>caucasica </i>Gurasashvili, 1983 preocc.</p><p style="margin-left: 40px;"><i>caucasicola </i>Tobias, 1986</p>							Ireland
40193	Animalia		Arthropoda			Insecta			Hymenoptera			Ichneumonoidea	Braconidae	Alysiinae	Alysiini		Phaenocarpa	Phaenocarpa	trisulcata				Stelfox, 1950								Ireland
40194	Animalia		Arthropoda			Insecta			Hymenoptera			Ichneumonoidea	Braconidae	Alysiinae	Alysiini		Syncrasis						Förster, 1863	<p style="margin-left: 40px;"><i>PHAENOLYTA </i>Förster, 1863</p>
40195	Animalia		Arthropoda			Insecta			Hymenoptera			Ichneumonoidea	Braconidae	Alysiinae	Alysiini		Syncrasis		fucicola				(Haliday, 1838)	<p style="margin-left: 40px;"><i>Alysia fucicola </i>Haliday, 1838</p>							Ireland
40196	Animalia		Arthropoda			Insecta			Hymenoptera			Ichneumonoidea	Braconidae	Alysiinae	Alysiini		Syncrasis		halidayi				(Förster, 1863)	<p style="margin-left: 40px;"><i>Phaenolyta halidayi </i>Förster, 1863</p><p style="margin-left: 40px;"><i>fuscipes </i>preocc. unavailable</p>							England, Ireland
40197	Animalia		Arthropoda			Insecta			Hymenoptera			Ichneumonoidea	Braconidae	Alysiinae	Alysiini		Tanycarpa						Förster, 1863	<p style="margin-left: 40px;"><i>ACROBELA </i>Förster, 1863</p><p style="margin-left: 40px;"><i>EPICLISTA </i>Förster, 1863</p><p style="margin-left: 40px;"><i>HYPOSTROPHA </i>Förster, 1863</p>
40198	Animalia		Arthropoda			Insecta			Hymenoptera			Ichneumonoidea	Braconidae	Alysiinae	Alysiini		Tanycarpa		bicolor				(Nees, 1812)	<p style="margin-left: 40px;"><i>Bassus bicolor </i>Nees, 1812</p><p style="margin-left: 40px;"><i>ancilla </i>(Haliday, 1838, <i>Alysia </i>)</p>							England, Ireland
40199	Animalia		Arthropoda			Insecta			Hymenoptera			Ichneumonoidea	Braconidae	Alysiinae	Alysiini		Tanycarpa		gracilicornis				(Nees, 1812)	<p style="margin-left: 40px;"><i>Bassus gracilicornis </i>Nees, 1812</p>							Ireland
40200	Animalia		Arthropoda			Insecta			Hymenoptera			Ichneumonoidea	Braconidae	Alysiinae	Alysiini		Tanycarpa		mitis				Stelfox, 1941								England, Ireland
40201	Animalia		Arthropoda			Insecta			Hymenoptera			Ichneumonoidea	Braconidae	Alysiinae	Alysiini		Tanycarpa		punctata				van Achterberg, 1976
40202	Animalia		Arthropoda			Insecta			Hymenoptera			Ichneumonoidea	Braconidae	Alysiinae	Alysiini		Tanycarpa		rufinotata				(Haliday, 1838)	<p style="margin-left: 40px;"><i>Alysia rufinotata </i>Haliday, 1838</p><p style="margin-left: 40px;"><i>carinata </i>(Förster, 1863, <i>Acrobela </i>)</p><p style="margin-left: 40px;"><i>erythrogaster </i>(Förster, 1863, <i>Epiclista </i>)</p><p style="margin-left: 40px;"><i>foersteri </i>(Shenefelt, 1974, <i>Alysia </i>)</p>							England, Ireland
40203	Animalia		Arthropoda			Insecta			Hymenoptera			Ichneumonoidea	Braconidae	Alysiinae	Alysiini		Trachyusa						Ruthe, 1854	<p style="margin-left: 40px;"><i>COSMIOCARPA </i>Förster, 1863</p>									Distribution data from van Achterberg &amp; O’Connor (1990) and the collections of NMS.
40204	Animalia		Arthropoda			Insecta			Hymenoptera			Ichneumonoidea	Braconidae	Alysiinae	Alysiini		Trachyusa		aurora				(Haliday, 1838)	<p style="margin-left: 40px;"><i>Alysia aurora </i>Haliday, 1838</p><p style="margin-left: 40px;"><i>nigriceps </i>Ruthe, 1854</p>							England, Ireland
40205	Animalia		Arthropoda			Insecta			Hymenoptera			Ichneumonoidea	Braconidae	Alysiinae	Alysiini		Trachyusa		nigrothoracica				van Achterberg &amp; O’Connor, 1990								England, Ireland		added by van Achterberg &amp; O’Connor (1990)
40206	Animalia		Arthropoda			Insecta			Hymenoptera			Ichneumonoidea	Braconidae	Alysiinae	Dacnusini								Förster, 1863										The classification of the Dacnusini was revised by Griffiths (1964-68) in a pioneering treatment that was one of the first applications of explicit phylogenetic methods in taxonomy. It was also unusual in being based on extensive reared material. Griffiths’ classification is followed here although one of the consequences of his strict adherence to phylogenetic principles is that Chorebus and Dacn…
40207	Animalia		Arthropoda			Insecta			Hymenoptera			Ichneumonoidea	Braconidae	Alysiinae	Dacnusini		Amyras						Nixon, 1943
40208	Animalia		Arthropoda			Insecta			Hymenoptera			Ichneumonoidea	Braconidae	Alysiinae	Dacnusini		Amyras		clandestina				(Haliday, 1839)	<p style="margin-left: 40px;"><i>Alysia clandestina </i>Haliday, 1839</p><p style="margin-left: 40px;"><i>quadridentata </i>(Thomson, 1895, <i>Dacnusa </i>)</p>							Ireland
40209	Animalia		Arthropoda			Insecta			Hymenoptera			Ichneumonoidea	Braconidae	Alysiinae	Dacnusini		Aristelix						Nixon, 1943
40210	Animalia		Arthropoda			Insecta			Hymenoptera			Ichneumonoidea	Braconidae	Alysiinae	Dacnusini		Aristelix		phaenicura				(Haliday, 1839)	<p style="margin-left: 40px;"><i>Alysia phaenicura </i>Haliday, 1839</p><p style="margin-left: 40px;"><i>phoenicura </i>misspelling</p>							England, Ireland
40211	Animalia		Arthropoda			Insecta			Hymenoptera			Ichneumonoidea	Braconidae	Alysiinae	Dacnusini		Chaenusa						Haliday, 1839	<p style="margin-left: 40px;"><i>CHOREBIDEA </i>Viereck, 1914</p><p style="margin-left: 40px;"><i>CHOREBIDEA </i>Nixon, 1943 preocc.</p><p style="margin-left: 40px;"><i>CHOREBIDELLA </i>Riegel, 1947</p>									No recent revision of this genus.
40212	Animalia		Arthropoda			Insecta			Hymenoptera			Ichneumonoidea	Braconidae	Alysiinae	Dacnusini		Chaenusa		conjungens				(Nees, 1811)	<p style="margin-left: 40px;"><i>Bracon conjungens </i>Nees, 1811</p><p style="margin-left: 40px;"><i>conjugens </i>misspelling</p>							England, Scotland, Ireland
40213	Animalia		Arthropoda			Insecta			Hymenoptera			Ichneumonoidea	Braconidae	Alysiinae	Dacnusini		Chaenusa		elongata				Stelfox, 1957								Ireland
40214	Animalia		Arthropoda			Insecta			Hymenoptera			Ichneumonoidea	Braconidae	Alysiinae	Dacnusini		Chaenusa		limoniadum				(Marshall, 1896)	<p style="margin-left: 40px;"><i>Chorebus limoniadum </i>Marshall, 1896</p>							England		Transferred from Chorebus by Perepechayenko (2000).
40215	Animalia		Arthropoda			Insecta			Hymenoptera			Ichneumonoidea	Braconidae	Alysiinae	Dacnusini		Chaenusa		lymphata				(Haliday, 1839)	<p style="margin-left: 40px;"><i>Alysia lymphata </i>Haliday, 1839</p>							England, Ireland		Transferred from Chorebus by van Achterberg (1997).
40216	Animalia		Arthropoda			Insecta			Hymenoptera			Ichneumonoidea	Braconidae	Alysiinae	Dacnusini		Chaenusa		naiadum				(Haliday, 1839)	<p style="margin-left: 40px;"><i>Alysia naiadum </i>Haliday, 1839</p><p style="margin-left: 40px;"><i>naiadum </i>(Curtis, 1837, <i>Chorebus </i>) nom. nud.</p>							England, Scotland, Ireland
40217	Animalia		Arthropoda			Insecta			Hymenoptera			Ichneumonoidea	Braconidae	Alysiinae	Dacnusini		Chaenusa		nereidum				(Haliday, 1839)	<p style="margin-left: 40px;"><i>Alysia nereidum </i>Haliday, 1839</p><p style="margin-left: 40px;"><i>nereidum </i>(Curtis, 1837, <i>Chorebus </i>) nom. nud.</p>							England, Ireland
40218	Animalia		Arthropoda			Insecta			Hymenoptera			Ichneumonoidea	Braconidae	Alysiinae	Dacnusini		Chaenusa		opaca				Stelfox, 1957								Ireland
40219	Animalia		Arthropoda			Insecta			Hymenoptera			Ichneumonoidea	Braconidae	Alysiinae	Dacnusini		Chorebus						Haliday, 1833	<p style="margin-left: 40px;"><i>AMETRIA </i>Förster, 1863</p><p style="margin-left: 40px;"><i>GYROCAMPA </i>Förster, 1863</p><p style="margin-left: 40px;"><i>PHAENOLEXIS </i>Förster, 1863</p><p style="margin-left: 40px;"><i>STIPHROCERA </i>Förster, 1863</p><p style="margin-left: 40px;"><i>DIPLUSIA </i>Ruthe, 1882</p><p style="margin-left: 40px;"><i>ETRIPTES </i>Nixon, 1943</p><p style="margin-le…
40220	Animalia		Arthropoda			Insecta			Hymenoptera			Ichneumonoidea	Braconidae	Alysiinae	Dacnusini		Chorebus		abaris				(Nixon, 1943)	<p style="margin-left: 40px;"><i>Dacnusa abaris </i>Nixon, 1943</p>							England, Scotland
40221	Animalia		Arthropoda			Insecta			Hymenoptera			Ichneumonoidea	Braconidae	Alysiinae	Dacnusini		Chorebus		abnormiceps				(Nixon, 1943)	<p style="margin-left: 40px;"><i>Dacnusa abnormiceps </i>Nixon, 1943</p><p style="margin-left: 40px;"><i>quadriceps </i>(Nixon, 1941, <i>Dacnusa </i>) preocc.</p>							England
40222	Animalia		Arthropoda			Insecta			Hymenoptera			Ichneumonoidea	Braconidae	Alysiinae	Dacnusini		Chorebus		agraules				(Nixon, 1945)	<p style="margin-left: 40px;"><i>Dacnusa agraules </i>Nixon, 1945</p>							England
40223	Animalia		Arthropoda			Insecta			Hymenoptera			Ichneumonoidea	Braconidae	Alysiinae	Dacnusini		Chorebus		albipes				(Haliday, 1839)	<p style="margin-left: 40px;"><i>Alysia albipes </i>Haliday, 1839</p>							England, Scotland, Ireland
40224	Animalia		Arthropoda			Insecta			Hymenoptera			Ichneumonoidea	Braconidae	Alysiinae	Dacnusini		Chorebus		alecto				(Morley, 1924)	<p style="margin-left: 40px;"><i>Rhizarcha alecto </i>Morley, 1924</p><p style="margin-left: 40px;"><i>turissa </i>(Nixon, 1937, <i>Dacnusa </i>)</p>							England, Scotland, Ireland
40225	Animalia		Arthropoda			Insecta			Hymenoptera			Ichneumonoidea	Braconidae	Alysiinae	Dacnusini		Chorebus		alua				(Nixon, 1944)	<p style="margin-left: 40px;"><i>Dacnusa alua </i>Nixon, 1944</p>							Ireland
40226	Animalia		Arthropoda			Insecta			Hymenoptera			Ichneumonoidea	Braconidae	Alysiinae	Dacnusini		Chorebus		amasis				(Nixon, 1945)	<p style="margin-left: 40px;"><i>Dacnusa amasis </i>Nixon, 1945</p>							England
40227	Animalia		Arthropoda			Insecta			Hymenoptera			Ichneumonoidea	Braconidae	Alysiinae	Dacnusini		Chorebus		ampliator				(Nees, 1834)	<p style="margin-left: 40px;"><i>Alysia ampliator </i>Nees, 1834</p><p style="margin-left: 40px;"><i>nigricornis </i>(Förster, 1863, <i>Stiphrocera </i>)</p>							England, Scotland, Ireland
40228	Animalia		Arthropoda			Insecta			Hymenoptera			Ichneumonoidea	Braconidae	Alysiinae	Dacnusini		Chorebus		anasellus				(Stelfox, 1952)	<p style="margin-left: 40px;"><i>Dacnusa anasella </i>Stelfox, 1952</p>							Scotland, Ireland
40229	Animalia		Arthropoda			Insecta			Hymenoptera			Ichneumonoidea	Braconidae	Alysiinae	Dacnusini		Chorebus		angelicae				(Nixon, 1945)	<p style="margin-left: 40px;"><i>Dacnusa angelicae </i>Nixon, 1945</p>							England
40230	Animalia		Arthropoda			Insecta			Hymenoptera			Ichneumonoidea	Braconidae	Alysiinae	Dacnusini		Chorebus		anita				(Nixon, 1943)	<p style="margin-left: 40px;"><i>Dacnusa anita </i>Nixon, 1943</p>							England, Scotland
40231	Animalia		Arthropoda			Insecta			Hymenoptera			Ichneumonoidea	Braconidae	Alysiinae	Dacnusini		Chorebus		aphantus				(Marshall, 1895)	<p style="margin-left: 40px;"><i>Dacnusa aphanta </i>Marshall, 1895</p>							England, Scotland, Wales, Ireland
40232	Animalia		Arthropoda			Insecta			Hymenoptera			Ichneumonoidea	Braconidae	Alysiinae	Dacnusini		Chorebus		apollyon				(Morley, 1924)	<p style="margin-left: 40px;"><i>Dacnusa apollyon </i>Morley, 1924</p>							England, Ireland
40233	Animalia		Arthropoda			Insecta			Hymenoptera			Ichneumonoidea	Braconidae	Alysiinae	Dacnusini		Chorebus		ares				(Nixon, 1944)	<p style="margin-left: 40px;"><i>Dacnusa ares </i>Nixon, 1944</p>							England
40234	Animalia		Arthropoda			Insecta			Hymenoptera			Ichneumonoidea	Braconidae	Alysiinae	Dacnusini		Chorebus		armida				(Nixon, 1945)	<p style="margin-left: 40px;"><i>Dacnusa armida </i>Nixon, 1945</p>							England, Scotland, Wales
40235	Animalia		Arthropoda			Insecta			Hymenoptera			Ichneumonoidea	Braconidae	Alysiinae	Dacnusini		Chorebus		artemisiellus				Griffiths, 1968								England
40236	Animalia		Arthropoda			Insecta			Hymenoptera			Ichneumonoidea	Braconidae	Alysiinae	Dacnusini		Chorebus		asramenes				(Nixon, 1943)	<p style="margin-left: 40px;"><i>Dacnusa asramenes </i>Nixon, 1943</p>							England, Ireland
40237	Animalia		Arthropoda			Insecta			Hymenoptera			Ichneumonoidea	Braconidae	Alysiinae	Dacnusini		Chorebus		avesta				(Nixon, 1944)	<p style="margin-left: 40px;"><i>Dacnusa avesta </i>Nixon, 1944</p>							England, Scotland
40238	Animalia		Arthropoda			Insecta			Hymenoptera			Ichneumonoidea	Braconidae	Alysiinae	Dacnusini		Chorebus		bathyzonus				(Marshall, 1895)	<p style="margin-left: 40px;"><i>Dacnusa bathyzona </i>Marshall, 1895</p><p style="margin-left: 40px;"><i>ornatus </i>(Telenga, 1935, <i>Dacnusa </i>)</p>							England, Ireland
40239	Animalia		Arthropoda			Insecta			Hymenoptera			Ichneumonoidea	Braconidae	Alysiinae	Dacnusini		Chorebus		bensoni				(Nixon, 1943)	<p style="margin-left: 40px;"><i>Dacnusa bensoni </i>Nixon, 1943</p>							England, Scotland
40240	Animalia		Arthropoda			Insecta			Hymenoptera			Ichneumonoidea	Braconidae	Alysiinae	Dacnusini		Chorebus		bres				(Nixon, 1944)	<p style="margin-left: 40px;"><i>Dacnusa bres </i>Nixon, 1944</p>							England, Ireland
40241	Animalia		Arthropoda			Insecta			Hymenoptera			Ichneumonoidea	Braconidae	Alysiinae	Dacnusini		Chorebus		brevicornis				(Thomson, 1895)	<p style="margin-left: 40px;"><i>Dacnusa brevicornis </i>Thomson, 1895</p><p style="margin-left: 40px;"><i>chrysippe </i>(Nixon, 1944, <i>Dacnusa </i>)</p><p style="margin-left: 40px;"><i>ea </i>(Nixon, 1944, <i>Dacnusa </i>)</p>							England, Scotland, Ireland
40242	Animalia		Arthropoda			Insecta			Hymenoptera			Ichneumonoidea	Braconidae	Alysiinae	Dacnusini		Chorebus		caelebs				(Nixon, 1944)	<p style="margin-left: 40px;"><i>Dacnusa caelebs </i>Nixon, 1944</p>							England
40243	Animalia		Arthropoda			Insecta			Hymenoptera			Ichneumonoidea	Braconidae	Alysiinae	Dacnusini		Chorebus		calthae				Griffiths, 1967								England
40244	Animalia		Arthropoda			Insecta			Hymenoptera			Ichneumonoidea	Braconidae	Alysiinae	Dacnusini		Chorebus		cambricus				Griffiths, 1968								Wales
40245	Animalia		Arthropoda			Insecta			Hymenoptera			Ichneumonoidea	Braconidae	Alysiinae	Dacnusini		Chorebus		cinctus				(Haliday, 1839)	<p style="margin-left: 40px;"><i>Alysia cincta </i>Haliday, 1839</p><p style="margin-left: 40px;"><i>castaneiventris </i>(Thomson, 1895, <i>Dacnusa </i>)</p>							England, Ireland
40246	Animalia		Arthropoda			Insecta			Hymenoptera			Ichneumonoidea	Braconidae	Alysiinae	Dacnusini		Chorebus		coxator				(Thomson, 1895)	<p style="margin-left: 40px;"><i>Dacnusa coxator </i>Thomson, 1895</p>							England, Scotland, Wales
40247	Animalia		Arthropoda			Insecta			Hymenoptera			Ichneumonoidea	Braconidae	Alysiinae	Dacnusini		Chorebus		crassipes				(Stelfox, 1954)	<p style="margin-left: 40px;"><i>Dacnusa crassipes </i>Stelfox, 1954</p>							Scotland, Ireland
40248	Animalia		Arthropoda			Insecta			Hymenoptera			Ichneumonoidea	Braconidae	Alysiinae	Dacnusini		Chorebus		credne				(Nixon, 1944)	<p style="margin-left: 40px;"><i>Dacnusa credne </i>Nixon, 1944</p>							England, Scotland, Ireland
40249	Animalia		Arthropoda			Insecta			Hymenoptera			Ichneumonoidea	Braconidae	Alysiinae	Dacnusini		Chorebus		crenulatus				(Thomson, 1895)	<p style="margin-left: 40px;"><i>Dacnusa crenulata </i>Thomson, 1895</p><p style="margin-left: 40px;"><i>elegantulus </i>(Nixon, 1937, <i>Dacnusa </i>)</p>							England, Scotland, Ireland
40250	Animalia		Arthropoda			Insecta			Hymenoptera			Ichneumonoidea	Braconidae	Alysiinae	Dacnusini		Chorebus		crocale				(Nixon, 1945)	<p style="margin-left: 40px;"><i>Dacnusa crocale </i>Nixon, 1945</p>							England
40251	Animalia		Arthropoda			Insecta			Hymenoptera			Ichneumonoidea	Braconidae	Alysiinae	Dacnusini		Chorebus		cubocephalus				(Telenga, 1934)	<p style="margin-left: 40px;"><i>Rhizarcha cubocephala </i>Telenga, 1934</p><p style="margin-left: 40px;"><i>cyclops </i>(Nixon, 1937, <i>Dacnusa </i>)</p>							Ireland
40252	Animalia		Arthropoda			Insecta			Hymenoptera			Ichneumonoidea	Braconidae	Alysiinae	Dacnusini		Chorebus		cylindricus				(Telenga, 1934)	<p style="margin-left: 40px;"><i>Dacnusa cylindrica </i>Telenga, 1934</p><p style="margin-left: 40px;"><i>cybele </i>(Nixon, 1937, <i>Dacnusa </i>)</p>							England, Scotland
40253	Animalia		Arthropoda			Insecta			Hymenoptera			Ichneumonoidea	Braconidae	Alysiinae	Dacnusini		Chorebus		cytherea				(Nixon, 1937)	<p style="margin-left: 40px;"><i>Dacnusa cytherea </i>Nixon, 1937</p><p style="margin-left: 40px;"><i>calliope </i>(Nixon, 1944, <i>Dacnusa </i>)</p><p style="margin-left: 40px;"><i>tesmia </i>(Nixon, 1944, <i>Dacnusa </i>)</p>							England, Scotland, Ireland
40254	Animalia		Arthropoda			Insecta			Hymenoptera			Ichneumonoidea	Braconidae	Alysiinae	Dacnusini		Chorebus		dagda				(Nixon, 1943)	<p style="margin-left: 40px;"><i>Dacnusa dagda </i>Nixon, 1943</p>							England
40255	Animalia		Arthropoda			Insecta			Hymenoptera			Ichneumonoidea	Braconidae	Alysiinae	Dacnusini		Chorebus		daimenes				(Nixon, 1945)	<p style="margin-left: 40px;"><i>Dacnusa daimenes </i>Nixon, 1945</p>							England, Scotland
40256	Animalia		Arthropoda			Insecta			Hymenoptera			Ichneumonoidea	Braconidae	Alysiinae	Dacnusini		Chorebus		deione				(Nixon, 1944)	<p style="margin-left: 40px;"><i>Dacnusa deione </i>Nixon, 1944</p>							England, Scotland
40257	Animalia		Arthropoda			Insecta			Hymenoptera			Ichneumonoidea	Braconidae	Alysiinae	Dacnusini		Chorebus		didas				(Nixon, 1944)	<p style="margin-left: 40px;"><i>Dacnusa didas </i>Nixon, 1944</p>							England, Scotland
40258	Animalia		Arthropoda			Insecta			Hymenoptera			Ichneumonoidea	Braconidae	Alysiinae	Dacnusini		Chorebus		difficilis				Griffiths, 1968								England
40259	Animalia		Arthropoda			Insecta			Hymenoptera			Ichneumonoidea	Braconidae	Alysiinae	Dacnusini		Chorebus		diremtus				(Nees, 1834)	<p style="margin-left: 40px;"><i>Alysia diremta </i>Nees, 1834</p><p style="margin-left: 40px;"><i>diremptus </i>(Haliday, 1839, <i>Alysia </i>)</p>							England, Ireland
40260	Animalia		Arthropoda			Insecta			Hymenoptera			Ichneumonoidea	Braconidae	Alysiinae	Dacnusini		Chorebus		dirona				(Nixon, 1945)	<p style="margin-left: 40px;"><i>Dacnusa dirona </i>Nixon, 1945</p>							England, Ireland
40261	Animalia		Arthropoda			Insecta			Hymenoptera			Ichneumonoidea	Braconidae	Alysiinae	Dacnusini		Chorebus		enephes				(Nixon, 1945)	<p style="margin-left: 40px;"><i>Dacnusa enephes </i>Nixon, 1945</p>							England
40262	Animalia		Arthropoda			Insecta			Hymenoptera			Ichneumonoidea	Braconidae	Alysiinae	Dacnusini		Chorebus		eros				(Nixon, 1937)	<p style="margin-left: 40px;"><i>Dacnusa eros </i>Nixon, 1937</p>							England, Scotland, Ireland
40263	Animalia		Arthropoda			Insecta			Hymenoptera			Ichneumonoidea	Braconidae	Alysiinae	Dacnusini		Chorebus		esbelta				(Nixon, 1937)	<p style="margin-left: 40px;"><i>Dacnusa esbelta </i>Nixon, 1937</p>							England, Scotland, Ireland
40264	Animalia		Arthropoda			Insecta			Hymenoptera			Ichneumonoidea	Braconidae	Alysiinae	Dacnusini		Chorebus		euryale				(Nixon, 1944)	<p style="margin-left: 40px;"><i>Dacnusa euryale </i>Nixon, 1944</p>							England
40265	Animalia		Arthropoda			Insecta			Hymenoptera			Ichneumonoidea	Braconidae	Alysiinae	Dacnusini		Chorebus		fallaciosae				Griffiths, 1967								England
40266	Animalia		Arthropoda			Insecta			Hymenoptera			Ichneumonoidea	Braconidae	Alysiinae	Dacnusini		Chorebus		fallax				(Nixon, 1937)	<p style="margin-left: 40px;"><i>Dacnusa fallax </i>Nixon, 1937</p>							England, Scotland, Ireland
40267	Animalia		Arthropoda			Insecta			Hymenoptera			Ichneumonoidea	Braconidae	Alysiinae	Dacnusini		Chorebus		flavipes				(Goureau, 1851)	<p style="margin-left: 40px;"><i>Dacnusa flavipes </i>Goureau, 1851</p><p style="margin-left: 40px;"><i>raissa </i>(Nixon, 1937, <i>Dacnusa </i>)</p>							England, Scotland, Ireland
40268	Animalia		Arthropoda			Insecta			Hymenoptera			Ichneumonoidea	Braconidae	Alysiinae	Dacnusini		Chorebus		fordi				(Nixon, 1954)	<p style="margin-left: 40px;"><i>Dacnusa fordi </i>Nixon, 1954</p>							England
40269	Animalia		Arthropoda			Insecta			Hymenoptera			Ichneumonoidea	Braconidae	Alysiinae	Dacnusini		Chorebus		foveolus				(Haliday, 1839)	<p style="margin-left: 40px;"><i>Alysia foveola </i>Haliday, 1839</p>							England, Scotland, Wales, Ireland
40270	Animalia		Arthropoda			Insecta			Hymenoptera			Ichneumonoidea	Braconidae	Alysiinae	Dacnusini		Chorebus		fuscipennis				(Nixon, 1937)	<p style="margin-left: 40px;"><i>Dacnusa fuscipennis </i>Nixon, 1937</p>							England
40271	Animalia		Arthropoda			Insecta			Hymenoptera			Ichneumonoidea	Braconidae	Alysiinae	Dacnusini		Chorebus		gedanensis				(Ratzeburg, 1852)	<p style="margin-left: 40px;"><i>Alysia gedanensis </i>Ratzeburg, 1852</p><p style="margin-left: 40px;"><i>anguligena </i>(Nixon, 1937, <i>Dacnusa </i>)</p>							England
40272	Animalia		Arthropoda			Insecta			Hymenoptera			Ichneumonoidea	Braconidae	Alysiinae	Dacnusini		Chorebus		glaber				(Nixon, 1944)	<p style="margin-left: 40px;"><i>Dacnusa glabra </i>Nixon, 1944</p>							England, Ireland
40273	Animalia		Arthropoda			Insecta			Hymenoptera			Ichneumonoidea	Braconidae	Alysiinae	Dacnusini		Chorebus		glabriculus				(Thomson, 1895)	<p style="margin-left: 40px;"><i>Dacnusa glabricula </i>Thomson, 1895</p><p style="margin-left: 40px;"><i>cortipalpis </i>(Nixon, 1937, <i>Dacnusa </i>)</p>							England, Scotland, Ireland
40274	Animalia		Arthropoda			Insecta			Hymenoptera			Ichneumonoidea	Braconidae	Alysiinae	Dacnusini		Chorebus		hilaris				Griffiths, 1967								England
40275	Animalia		Arthropoda			Insecta			Hymenoptera			Ichneumonoidea	Braconidae	Alysiinae	Dacnusini		Chorebus		hirtigena				Stelfox, 1957								Ireland
40276	Animalia		Arthropoda			Insecta			Hymenoptera			Ichneumonoidea	Braconidae	Alysiinae	Dacnusini		Chorebus		humeralis				Griffiths, 1968								Ireland
40277	Animalia		Arthropoda			Insecta			Hymenoptera			Ichneumonoidea	Braconidae	Alysiinae	Dacnusini		Chorebus		incertus				(Goureau, 1851)	<p style="margin-left: 40px;"><i>Dacnusa incerta </i>Goureau, 1851</p>							England
40278	Animalia		Arthropoda			Insecta			Hymenoptera			Ichneumonoidea	Braconidae	Alysiinae	Dacnusini		Chorebus		iphias				(Nixon, 1943)	<p style="margin-left: 40px;"><i>Dacnusa iphias </i>Nixon, 1943</p>							England
40279	Animalia		Arthropoda			Insecta			Hymenoptera			Ichneumonoidea	Braconidae	Alysiinae	Dacnusini		Chorebus		kama				(Nixon, 1945)	<p style="margin-left: 40px;"><i>Dacnusa kama </i>Nixon, 1945</p>							England
40280	Animalia		Arthropoda			Insecta			Hymenoptera			Ichneumonoidea	Braconidae	Alysiinae	Dacnusini		Chorebus		lanigerus				(Stelfox, 1957)	<p style="margin-left: 40px;"><i>Gyrocampa lanigera </i>Stelfox, 1957</p>							Ireland
40281	Animalia		Arthropoda			Insecta			Hymenoptera			Ichneumonoidea	Braconidae	Alysiinae	Dacnusini		Chorebus		lar				(Morley, 1924)	<p style="margin-left: 40px;"><i>Dacnusa lar </i>Morley, 1924</p><p style="margin-left: 40px;"><i>innanus </i>(Nixon, 1943, <i>Dacnusa </i>)</p>							England
40282	Animalia		Arthropoda			Insecta			Hymenoptera			Ichneumonoidea	Braconidae	Alysiinae	Dacnusini		Chorebus		larides				(Nixon, 1944)	<p style="margin-left: 40px;"><i>Dacnusa larides </i>Nixon, 1944</p>							England, Ireland
40283	Animalia		Arthropoda			Insecta			Hymenoptera			Ichneumonoidea	Braconidae	Alysiinae	Dacnusini		Chorebus		lateralis				(Haliday, 1839)	<p style="margin-left: 40px;"><i>Alysia lateralis </i>Haliday, 1839</p><p style="margin-left: 40px;"><i>fuscula </i>(Haliday, 1839, <i>Alysia </i>)</p><p style="margin-left: 40px;"><i>albicoxa </i>(Thomson, 1895, <i>Dacnusa </i>)</p>							England, Scotland, Wales, Ireland
40284	Animalia		Arthropoda			Insecta			Hymenoptera			Ichneumonoidea	Braconidae	Alysiinae	Dacnusini		Chorebus		leptogaster				(Haliday, 1839)	<p style="margin-left: 40px;"><i>Alysia leptogaster </i>Haliday, 1839</p><p style="margin-left: 40px;"><i>naenia </i>(Morley, 1924, <i>Dacnusa </i>)</p><p style="margin-left: 40px;"><i>dinae </i>(Burghele, 1960, <i>Dacnusa </i>)</p>							England, Ireland
40285	Animalia		Arthropoda			Insecta			Hymenoptera			Ichneumonoidea	Braconidae	Alysiinae	Dacnusini		Chorebus		longicornis				(Nees, 1811)	<p style="margin-left: 40px;"><i>Bracon longicornis </i>Nees, 1811</p><p style="margin-left: 40px;"><i>affinis </i>(Nees, 1812, <i>Bassus </i>)</p>							England, Scotland, Ireland		Synonymy first established in Shenefelt (1974) but overlooked until O’Connor et al. (1999).
40286	Animalia		Arthropoda			Insecta			Hymenoptera			Ichneumonoidea	Braconidae	Alysiinae	Dacnusini		Chorebus		lugubris				(Nixon, 1937)	<p style="margin-left: 40px;"><i>Dacnusa lugubris </i>Nixon, 1937</p>							England, Ireland
40287	Animalia		Arthropoda			Insecta			Hymenoptera			Ichneumonoidea	Braconidae	Alysiinae	Dacnusini		Chorebus		luzulae				Griffiths, 1966								Scotland		added by Godfray &amp; Bland (2011)
40288	Animalia		Arthropoda			Insecta			Hymenoptera			Ichneumonoidea	Braconidae	Alysiinae	Dacnusini		Chorebus		lychnidis				Griffiths, 1967								England
40289	Animalia		Arthropoda			Insecta			Hymenoptera			Ichneumonoidea	Braconidae	Alysiinae	Dacnusini		Chorebus		maculigastra				Shenefelt, 1974	<p style="margin-left: 40px;"><i>maculata </i>(Nixon, 1944, <i>Dacnusa </i>) preocc.</p>							England, Ireland
40290	Animalia		Arthropoda			Insecta			Hymenoptera			Ichneumonoidea	Braconidae	Alysiinae	Dacnusini		Chorebus		merellus				(Nixon, 1937)	<p style="margin-left: 40px;"><i>Dacnusa merella </i>Nixon, 1937</p>							England, Scotland, Ireland
40291	Animalia		Arthropoda			Insecta			Hymenoptera			Ichneumonoidea	Braconidae	Alysiinae	Dacnusini		Chorebus		merion				(Nixon, 1945)	<p style="margin-left: 40px;"><i>Dacnusa merion </i>Nixon, 1945</p>							England
40292	Animalia		Arthropoda			Insecta			Hymenoptera			Ichneumonoidea	Braconidae	Alysiinae	Dacnusini		Chorebus		miodes				(Nixon, 1949)	<p style="margin-left: 40px;"><i>Gyrocampa miodes </i>Nixon, 1949</p>							England, Ireland
40293	Animalia		Arthropoda			Insecta			Hymenoptera			Ichneumonoidea	Braconidae	Alysiinae	Dacnusini		Chorebus		misellus				(Marshall, 1895)	<p style="margin-left: 40px;"><i>Dacnusa misella </i>Marshall, 1895</p>							England
40294	Animalia		Arthropoda			Insecta			Hymenoptera			Ichneumonoidea	Braconidae	Alysiinae	Dacnusini		Chorebus		mitrus				(Nixon, 1945)	<p style="margin-left: 40px;"><i>Dacnusa mitra </i>Nixon, 1945</p>							England, Scotland, Ireland
40295	Animalia		Arthropoda			Insecta			Hymenoptera			Ichneumonoidea	Braconidae	Alysiinae	Dacnusini		Chorebus		nanus				(Nixon, 1943)	<p style="margin-left: 40px;"><i>Dacnusa nana </i>Nixon, 1943</p>							England
40296	Animalia		Arthropoda			Insecta			Hymenoptera			Ichneumonoidea	Braconidae	Alysiinae	Dacnusini		Chorebus		navicularis				(Nees, 1812)	<p style="margin-left: 40px;"><i>Bassus navicularis </i>Nees, 1812</p>							England
40297	Animalia		Arthropoda			Insecta			Hymenoptera			Ichneumonoidea	Braconidae	Alysiinae	Dacnusini		Chorebus		nerissus				(Nixon, 1937)	<p style="margin-left: 40px;"><i>Dacnusa nerissa </i>Nixon, 1937</p>							England
40298	Animalia		Arthropoda			Insecta			Hymenoptera			Ichneumonoidea	Braconidae	Alysiinae	Dacnusini		Chorebus		nigriscaposus				(Nixon, 1949)	<p style="margin-left: 40px;"><i>Gyrocampa nigriscaposa </i>Nixon, 1949</p><p style="margin-left: 40px;"><i>propodealis </i>(Nixon, 1949, <i>Gyrocampa </i>)</p>							Ireland
40299	Animalia		Arthropoda			Insecta			Hymenoptera			Ichneumonoidea	Braconidae	Alysiinae	Dacnusini		Chorebus		ninella				(Nixon, 1945)	<p style="margin-left: 40px;"><i>Dacnusa ninella </i>Nixon, 1945</p>							England, Scotland, Ireland
40300	Animalia		Arthropoda			Insecta			Hymenoptera			Ichneumonoidea	Braconidae	Alysiinae	Dacnusini		Chorebus		nobilis				Griffiths, 1968								England, Ireland
40301	Animalia		Arthropoda			Insecta			Hymenoptera			Ichneumonoidea	Braconidae	Alysiinae	Dacnusini		Chorebus		nomia				(Nixon, 1937)	<p style="margin-left: 40px;"><i>Dacnusa nomia </i>Nixon, 1937</p>							England, Ireland
40302	Animalia		Arthropoda			Insecta			Hymenoptera			Ichneumonoidea	Braconidae	Alysiinae	Dacnusini		Chorebus		nydia				(Nixon, 1937)	<p style="margin-left: 40px;"><i>Dacnusa nydia </i>Nixon, 1937</p>							England, Scotland, Ireland
40303	Animalia		Arthropoda			Insecta			Hymenoptera			Ichneumonoidea	Braconidae	Alysiinae	Dacnusini		Chorebus		orbiculatae				Griffiths, 1967								England, Ireland
40304	Animalia		Arthropoda			Insecta			Hymenoptera			Ichneumonoidea	Braconidae	Alysiinae	Dacnusini		Chorebus		ovalis				(Marshall, 1896)	<p style="margin-left: 40px;"><i>Dacnusa ovalis </i>Marshall, 1896</p>							England, Ireland
40305	Animalia		Arthropoda			Insecta			Hymenoptera			Ichneumonoidea	Braconidae	Alysiinae	Dacnusini		Chorebus		parvungula				(Thomson, 1895)	<p style="margin-left: 40px;"><i>Dacnusa parvungula </i>Thomson, 1895</p><p style="margin-left: 40px;"><i>acco </i>(Nixon, 1943, <i>Dacnusa </i>)</p>							England, Scotland, Ireland
40306	Animalia		Arthropoda			Insecta			Hymenoptera			Ichneumonoidea	Braconidae	Alysiinae	Dacnusini		Chorebus		perkinsi				(Nixon, 1944)	<p style="margin-left: 40px;"><i>Dacnusa perkinsi </i>Nixon, 1944</p>							England
40307	Animalia		Arthropoda			Insecta			Hymenoptera			Ichneumonoidea	Braconidae	Alysiinae	Dacnusini		Chorebus		petiolatus				(Nees, 1834)	<p style="margin-left: 40px;"><i>Alysia petiolata </i>Nees, 1834</p>							England, Scotland, Ireland
40308	Animalia		Arthropoda			Insecta			Hymenoptera			Ichneumonoidea	Braconidae	Alysiinae	Dacnusini		Chorebus		phaedra				(Nixon, 1937)	<p style="margin-left: 40px;"><i>Dacnusa phaedra </i>Nixon, 1937</p>							England, Scotland
40309	Animalia		Arthropoda			Insecta			Hymenoptera			Ichneumonoidea	Braconidae	Alysiinae	Dacnusini		Chorebus		pimpinellae				Griffiths, 1967								England
40310	Animalia		Arthropoda			Insecta			Hymenoptera			Ichneumonoidea	Braconidae	Alysiinae	Dacnusini		Chorebus		pione				(Nixon, 1944)	<p style="margin-left: 40px;"><i>Dacnusa pione </i>Nixon, 1944</p>							England
40311	Animalia		Arthropoda			Insecta			Hymenoptera			Ichneumonoidea	Braconidae	Alysiinae	Dacnusini		Chorebus		poemyzae				Griffiths, 1968								England, Scotland
40312	Animalia		Arthropoda			Insecta			Hymenoptera			Ichneumonoidea	Braconidae	Alysiinae	Dacnusini		Chorebus		posticus				(Haliday, 1839)	<p style="margin-left: 40px;"><i>Alysia postica </i>Haliday, 1839</p><p style="margin-left: 40px;"><i>gracilis </i>(Nees, 1834, <i>Alysia </i>)</p><p style="margin-left: 40px;"><i>egregia </i>(Marshall, 1895, <i>Dacnusa </i>)</p><p style="margin-left: 40px;"><i>dentatus </i>(Tobias, 1962, <i>Dacnusa </i>)</p>							England, Scotland, Ireland
40313	Animalia		Arthropoda			Insecta			Hymenoptera			Ichneumonoidea	Braconidae	Alysiinae	Dacnusini		Chorebus		pulverosus				(Haliday, 1839)	<p style="margin-left: 40px;"><i>Alysia pulverosa </i>Haliday, 1839</p><p style="margin-left: 40px;"><i>marsyas </i>(Nixon, 1937, <i>Dacnusa </i>)</p>							England, Ireland
40314	Animalia		Arthropoda			Insecta			Hymenoptera			Ichneumonoidea	Braconidae	Alysiinae	Dacnusini		Chorebus		punctum				(Goureau, 1851)	<p style="margin-left: 40px;"><i>Dacnusa punctum </i>Goureau, 1851</p>							England, Scotland, Ireland
40315	Animalia		Arthropoda			Insecta			Hymenoptera			Ichneumonoidea	Braconidae	Alysiinae	Dacnusini		Chorebus		resa				(Nixon, 1937)	<p style="margin-left: 40px;"><i>Dacnusa resa </i>Nixon, 1937</p>							England
40316	Animalia		Arthropoda			Insecta			Hymenoptera			Ichneumonoidea	Braconidae	Alysiinae	Dacnusini		Chorebus		rhanis				(Nixon, 1943)	<p style="margin-left: 40px;"><i>Dacnusa rhanis </i>Nixon, 1943</p>							Scotland
40317	Animalia		Arthropoda			Insecta			Hymenoptera			Ichneumonoidea	Braconidae	Alysiinae	Dacnusini		Chorebus		risilis				(Nixon, 1949)	<p style="margin-left: 40px;"><i>Gyrocampa risilis </i>Nixon, 1949</p>							Ireland
40318	Animalia		Arthropoda			Insecta			Hymenoptera			Ichneumonoidea	Braconidae	Alysiinae	Dacnusini		Chorebus		rondanii				(Giard, 1904)	<p style="margin-left: 40px;"><i>Dacnusa rondanii </i>Giard, 1904</p><p style="margin-left: 40px;"><i>galbus </i>(Nixon, 1944, <i>Dacnusa </i>)</p>							England
40319	Animalia		Arthropoda			Insecta			Hymenoptera			Ichneumonoidea	Braconidae	Alysiinae	Dacnusini		Chorebus		rotundiventris				(Thomson, 1895)	<p style="margin-left: 40px;"><i>Dacnusa rotundiventris </i>Thomson, 1895</p>							Ireland
40320	Animalia		Arthropoda			Insecta			Hymenoptera			Ichneumonoidea	Braconidae	Alysiinae	Dacnusini		Chorebus		rousseaui				(Schulz, 1907)	<p style="margin-left: 40px;"><i>Dacnusa rousseaui </i>Schulz, 1907</p>									The status of this taxon needs further research.
40321	Animalia		Arthropoda			Insecta			Hymenoptera			Ichneumonoidea	Braconidae	Alysiinae	Dacnusini		Chorebus		ruficollis				(Stelfox, 1957)	<p style="margin-left: 40px;"><i>Gyrocampa ruficollis </i>Stelfox, 1957</p>							Ireland
40322	Animalia		Arthropoda			Insecta			Hymenoptera			Ichneumonoidea	Braconidae	Alysiinae	Dacnusini		Chorebus		rufimarginatus				(Stelfox, 1954)	<p style="margin-left: 40px;"><i>Dacnusa rufimarginata </i>Stelfox, 1954</p>							Ireland
40323	Animalia		Arthropoda			Insecta			Hymenoptera			Ichneumonoidea	Braconidae	Alysiinae	Dacnusini		Chorebus		scabiosae				Griffiths, 1967								England
40324	Animalia		Arthropoda			Insecta			Hymenoptera			Ichneumonoidea	Braconidae	Alysiinae	Dacnusini		Chorebus		scabrifossa				Stelfox, 1957								Ireland
40325	Animalia		Arthropoda			Insecta			Hymenoptera			Ichneumonoidea	Braconidae	Alysiinae	Dacnusini		Chorebus		selene				(Nixon, 1937)	<p style="margin-left: 40px;"><i>Dacnusa selene </i>Nixon, 1937</p>							England, Scotland
40326	Animalia		Arthropoda			Insecta			Hymenoptera			Ichneumonoidea	Braconidae	Alysiinae	Dacnusini		Chorebus		senilis				(Nees, 1812)	<p style="margin-left: 40px;"><i>Bassus senilis </i>Nees, 1812</p><p style="margin-left: 40px;"><i>tomentosus </i>(Thomson, 1895, <i>Dacnusa </i>)</p><p style="margin-left: 40px;"><i>nemesis </i>(Morley, 1924, <i>Dacnusa </i>)</p>							England, Scotland, Wales, Ireland
40327	Animalia		Arthropoda			Insecta			Hymenoptera			Ichneumonoidea	Braconidae	Alysiinae	Dacnusini		Chorebus		serus				(Nixon, 1937)	<p style="margin-left: 40px;"><i>Dacnusa sera </i>Nixon, 1937</p>							England
40328	Animalia		Arthropoda			Insecta			Hymenoptera			Ichneumonoidea	Braconidae	Alysiinae	Dacnusini		Chorebus		siniffa				(Nixon, 1937)	<p style="margin-left: 40px;"><i>Dacnusa siniffa </i>Nixon, 1937</p>							England, Ireland
40329	Animalia		Arthropoda			Insecta			Hymenoptera			Ichneumonoidea	Braconidae	Alysiinae	Dacnusini		Chorebus		solstitialis				(Stelfox, 1952)	<p style="margin-left: 40px;"><i>Dacnusa solstitialis </i>Stelfox, 1952</p>							England
40330	Animalia		Arthropoda			Insecta			Hymenoptera			Ichneumonoidea	Braconidae	Alysiinae	Dacnusini		Chorebus		spenceri				Griffiths, 1964								England, Scotland
40331	Animalia		Arthropoda			Insecta			Hymenoptera			Ichneumonoidea	Braconidae	Alysiinae	Dacnusini		Chorebus		striola				Stelfox, 1957								Ireland
40332	Animalia		Arthropoda			Insecta			Hymenoptera			Ichneumonoidea	Braconidae	Alysiinae	Dacnusini		Chorebus		sylvestris				Griffiths, 1967								England, Scotland, Ireland
40333	Animalia		Arthropoda			Insecta			Hymenoptera			Ichneumonoidea	Braconidae	Alysiinae	Dacnusini		Chorebus		talaris				(Haliday, 1839)	<p style="margin-left: 40px;"><i>Alysia talaris </i>Haliday, 1839</p>							England, Scotland, Ireland
40334	Animalia		Arthropoda			Insecta			Hymenoptera			Ichneumonoidea	Braconidae	Alysiinae	Dacnusini		Chorebus		tamiris				(Nixon, 1943)	<p style="margin-left: 40px;"><i>Dacnusa tamiris </i>Nixon, 1943</p>							England
40335	Animalia		Arthropoda			Insecta			Hymenoptera			Ichneumonoidea	Braconidae	Alysiinae	Dacnusini		Chorebus		tamsi				(Nixon, 1944)	<p style="margin-left: 40px;"><i>Dacnusa tamsi </i>Nixon, 1944</p>							England
40336	Animalia		Arthropoda			Insecta			Hymenoptera			Ichneumonoidea	Braconidae	Alysiinae	Dacnusini		Chorebus		tanis				(Nixon, 1945)	<p style="margin-left: 40px;"><i>Dacnusa tanis </i>Nixon, 1945</p>							England
40337	Animalia		Arthropoda			Insecta			Hymenoptera			Ichneumonoidea	Braconidae	Alysiinae	Dacnusini		Chorebus		tenellae				Griffiths, 1967								Scotland, Ireland		added by Griffiths (1984)
40338	Animalia		Arthropoda			Insecta			Hymenoptera			Ichneumonoidea	Braconidae	Alysiinae	Dacnusini		Chorebus		thecla				(Nixon, 1943)	<p style="margin-left: 40px;"><i>Dacnusa thecla </i>Nixon, 1943</p>							England
40339	Animalia		Arthropoda			Insecta			Hymenoptera			Ichneumonoidea	Braconidae	Alysiinae	Dacnusini		Chorebus		thisbe				(Nixon, 1937)	<p style="margin-left: 40px;"><i>Dacnusa thisbe </i>Nixon, 1937</p>							England
40340	Animalia		Arthropoda			Insecta			Hymenoptera			Ichneumonoidea	Braconidae	Alysiinae	Dacnusini		Chorebus		thusa				(Nixon, 1937)	<p style="margin-left: 40px;"><i>Dacnusa thusa </i>Nixon, 1937</p>							England, Ireland
40341	Animalia		Arthropoda			Insecta			Hymenoptera			Ichneumonoidea	Braconidae	Alysiinae	Dacnusini		Chorebus		transversus				(Nixon, 1954)	<p style="margin-left: 40px;"><i>Dacnusa transversa </i>Nixon, 1954</p>							England, Scotland, Ireland
40342	Animalia		Arthropoda			Insecta			Hymenoptera			Ichneumonoidea	Braconidae	Alysiinae	Dacnusini		Chorebus		trilobomyzae				Griffiths, 1968								England, Scotland
40343	Animalia		Arthropoda			Insecta			Hymenoptera			Ichneumonoidea	Braconidae	Alysiinae	Dacnusini		Chorebus		uliginosus				(Haliday, 1839)	<p style="margin-left: 40px;"><i>Alysia uliginosa </i>Haliday, 1839</p><p style="margin-left: 40px;"><i>thienemanni </i>(Ruschka, 1913, <i>Gyrocampa </i>)</p>							England, Ireland
40344	Animalia		Arthropoda			Insecta			Hymenoptera			Ichneumonoidea	Braconidae	Alysiinae	Dacnusini		Chorebus		uma				(Nixon, 1944)	<p style="margin-left: 40px;"><i>Dacnusa uma </i>Nixon, 1944</p>							England
40345	Animalia		Arthropoda			Insecta			Hymenoptera			Ichneumonoidea	Braconidae	Alysiinae	Dacnusini		Chorebus		varuna				(Nixon, 1945)	<p style="margin-left: 40px;"><i>Dacnusa varuna </i>Nixon, 1945</p>							England, Scotland
40346	Animalia		Arthropoda			Insecta			Hymenoptera			Ichneumonoidea	Braconidae	Alysiinae	Dacnusini		Chorebus		vernalis				Griffiths, 1968								England
40347	Animalia		Arthropoda			Insecta			Hymenoptera			Ichneumonoidea	Braconidae	Alysiinae	Dacnusini		Chorebus		vitripennis				Griffiths, 1968								Scotland, Wales, Ireland
40348	Animalia		Arthropoda			Insecta			Hymenoptera			Ichneumonoidea	Braconidae	Alysiinae	Dacnusini		Coelinidea						Viereck, 1913	<p style="margin-left: 40px;"><i>LEPTON </i>Zetterstedt, 1838 preocc.</p><p style="margin-left: 40px;"><i>ERICOELINIUS </i>Viereck, 1913</p><p style="margin-left: 40px;"><i>FISCHERASTRIOLUS </i>Perepechayenko, 1999</p>									There is no recent treatment of this genus; generic synonymy follows van Achterberg (2014).
40349	Animalia		Arthropoda			Insecta			Hymenoptera			Ichneumonoidea	Braconidae	Alysiinae	Dacnusini		Coelinidea		elegans				(Curtis, 1829)	<p style="margin-left: 40px;"><i>Chaenon elegans </i>Curtis, 1829</p><p style="margin-left: 40px;"><i>brevicornis </i>(Curtis, 1829, <i>Chaenon </i>)</p><p style="margin-left: 40px;"><i>cingulatus </i>(Curtis, 1829, <i>Chaenon </i>)</p><p style="margin-left: 40px;"><i>rufinotatus </i>(Curtis, 1829, <i>Chaenon </i>)</p><p style="margin-left: 40px;"><i>similis </i>(Curtis, 1829, <i>Chaenon </i>)</p>							England, Ireland
40350	Animalia		Arthropoda			Insecta			Hymenoptera			Ichneumonoidea	Braconidae	Alysiinae	Dacnusini		Coelinidea		fuliginosus				(Curtis, 1829)	<p style="margin-left: 40px;"><i>Chaenon fuliginosus </i>Curtis, 1829</p>							England
40351	Animalia		Arthropoda			Insecta			Hymenoptera			Ichneumonoidea	Braconidae	Alysiinae	Dacnusini		Coelinidea		gracilis				(Curtis, 1829)	<p style="margin-left: 40px;"><i>Chaenon gracilis </i>Curtis, 1829</p><p style="margin-left: 40px;"><i>attenuator </i>(Zetterstedt, 1838, <i>Lepton </i>)</p>							England, Scotland, Ireland
40352	Animalia		Arthropoda			Insecta			Hymenoptera			Ichneumonoidea	Braconidae	Alysiinae	Dacnusini		Coelinidea		niger				(Nees, 1811)	<p style="margin-left: 40px;"><i>Stephanus niger </i>Nees, 1811</p><p style="margin-left: 40px;"><i>affinis </i>(Curtis, 1829, <i>Chaenon </i>)</p><p style="margin-left: 40px;"><i>nigricans </i>(Westwood, 1835, <i>Chaenon </i>)</p><p style="margin-left: 40px;"><i>olivieri </i>(Guérin-Ménéville, 1842, <i>Alysia </i>)</p>							England, Ireland
40353	Animalia		Arthropoda			Insecta			Hymenoptera			Ichneumonoidea	Braconidae	Alysiinae	Dacnusini		Coelinidea		obscurus				(Curtis, 1829)	<p style="margin-left: 40px;"><i>Chaenon obscurus </i>Curtis, 1829</p>							England
40354	Animalia		Arthropoda			Insecta			Hymenoptera			Ichneumonoidea	Braconidae	Alysiinae	Dacnusini		Coelinidea		podagricus				(Haliday, 1839)	<p style="margin-left: 40px;"><i>Alysia podagrica </i>Haliday, 1839</p>							Ireland
40355	Animalia		Arthropoda			Insecta			Hymenoptera			Ichneumonoidea	Braconidae	Alysiinae	Dacnusini		Coelinidea		ruficollis				(Herrich-Schäffer, 1838)	<p style="margin-left: 40px;"><i>Coelinius ruficollis </i>Herrich-Schäffer, 1838</p><p style="margin-left: 40px;"><i>procerus </i>(Haliday, 1839, <i>Alysia </i>)</p>							England
40356	Animalia		Arthropoda			Insecta			Hymenoptera			Ichneumonoidea	Braconidae	Alysiinae	Dacnusini		Coelinidea		viduus				(Curtis, 1829)	<p style="margin-left: 40px;"><i>Chaenon viduus </i>Curtis, 1829</p><p style="margin-left: 40px;"><i>ater </i>(Curtis, 1837, <i>Chaenon </i>) nom. nud.</p>							England, Ireland
40357	Animalia		Arthropoda			Insecta			Hymenoptera			Ichneumonoidea	Braconidae	Alysiinae	Dacnusini		Coelinius						Nees, 1818	<p style="margin-left: 40px;"><i>CHAENON </i>Curtis, 1829</p><p style="margin-left: 40px;"><i>COPISURA </i>Schiødte,1837</p><p style="margin-left: 40px;"><i>COPIDURA </i>Förster,1862</p>									Griffiths (1964) proposed that Polemochartus and Coelinidea should be included as subgenera of Coelinius. Wharton & Austin (1991), Wharton (1994) and Kula (2008) supported the concept of an enlarged Coelinius but, pointing to intermediate taxa in the Oriental Region, argued against the retention of subgenera. Van Achterberg (2014) retains the three genera which is current European usage and is fo…
40358	Animalia		Arthropoda			Insecta			Hymenoptera			Ichneumonoidea	Braconidae	Alysiinae	Dacnusini		Coelinius		parvulus				(Nees, 1811)	<p style="margin-left: 40px;"><i>Chaenon parvulus </i>Nees, 1811</p><p style="margin-left: 40px;"><i>?cultriformis </i>(Latreille, 1802, <i>Ichneumon </i>)</p><p style="margin-left: 40px;"><i>circulator </i>(Gravenhorst, 1807, <i>Ichneumon </i>) preocc.</p><p style="margin-left: 40px;"><i>anceps </i>(Curtis, 1829, <i>Chaenon </i>)</p><p style="margin-left: 40px;"><i>rimator </i>(Schiødte, 1837, <…							England, Scotland, Ireland, Isle of Man
40359	Animalia		Arthropoda			Insecta			Hymenoptera			Ichneumonoidea	Braconidae	Alysiinae	Dacnusini		Coloneura						Förster, 1863	<p style="margin-left: 40px;"><i>ISOMERISTA </i>Förster, 1863</p><p style="margin-left: 40px;"><i>TRISISA </i>Förster, 1863</p><p style="margin-left: 40px;"><i>MERITES </i>Nixon, 1943</p><p style="margin-left: 40px;"><i>PRIAPSIS </i>Nixon, 1943</p>
40360	Animalia		Arthropoda			Insecta			Hymenoptera			Ichneumonoidea	Braconidae	Alysiinae	Dacnusini		Coloneura		dice				(Nixon, 1943)	<p style="margin-left: 40px;"><i>Priapsis dice </i>Nixon, 1943</p>							England
40361	Animalia		Arthropoda			Insecta			Hymenoptera			Ichneumonoidea	Braconidae	Alysiinae	Dacnusini		Coloneura		stylata				Förster, 1863	<p style="margin-left: 40px;"><i>exilis </i>(Förster, 1863, <i>Trisisa </i>)</p><p style="margin-left: 40px;"><i>oligomera </i>(Förster, 1863, <i>Isomerista </i>)</p><p style="margin-left: 40px;"><i>taras </i>(Nixon, 1943, <i>Merites </i>)</p>							England, Ireland
40362	Animalia		Arthropoda			Insecta			Hymenoptera			Ichneumonoidea	Braconidae	Alysiinae	Dacnusini		Dacnusa						Haliday, 1833	<p style="margin-left: 40px;"><i>AGONIA </i>Förster, 1863</p><p style="margin-left: 40px;"><i>APHANTA </i>Förster, 1863</p><p style="margin-left: 40px;"><i>BRACHYSTROPHA </i>Förster, 1863</p><p style="margin-left: 40px;"><i>LIPOSCIA </i>Förster, 1863</p><p style="margin-left: 40px;"><i>PACHYSEMA </i>Förster, 1863</p><p style="margin-left: 40px;"><i>RHIZARCHA </i>Förster, 1863</p><p style="margin-…
40363	Animalia		Arthropoda			Insecta			Hymenoptera			Ichneumonoidea	Braconidae	Alysiinae	Dacnusini		Dacnusa		abdita				Haliday, 1838	<p style="margin-left: 40px;"><i>incidens </i>Thomson, 1895</p><p style="margin-left: 40px;"><i>lepida </i>Marshall, 1896</p>							England, Scotland, Wales, Ireland
40364	Animalia		Arthropoda			Insecta			Hymenoptera			Ichneumonoidea	Braconidae	Alysiinae	Dacnusini		Dacnusa		adducta				(Haliday, 1839)	<p style="margin-left: 40px;"><i>Alysia adducta </i>Haliday, 1839</p><p style="margin-left: 40px;"><i>abducta </i>misspelling</p>							England, Scotland, Ireland
40365	Animalia		Arthropoda			Insecta			Hymenoptera			Ichneumonoidea	Braconidae	Alysiinae	Dacnusini		Dacnusa		alticeps				Nixon, 1937								England, Scotland
40366	Animalia		Arthropoda			Insecta			Hymenoptera			Ichneumonoidea	Braconidae	Alysiinae	Dacnusini		Dacnusa		aquilegiae				Marshall, 1896								England, Scotland
40367	Animalia		Arthropoda			Insecta			Hymenoptera			Ichneumonoidea	Braconidae	Alysiinae	Dacnusini		Dacnusa		areolaris				(Nees, 1811)	<p style="margin-left: 40px;"><i>Bracon areolaris </i>Nees, 1811</p><p style="margin-left: 40px;"><i>lysias </i>Goureau, 1851</p>							England, Scotland, Wales, Ireland
40368	Animalia		Arthropoda			Insecta			Hymenoptera			Ichneumonoidea	Braconidae	Alysiinae	Dacnusini		Dacnusa		astarte				(Nixon, 1948)	<p style="margin-left: 40px;"><i>Rhizarcha astarte </i>Nixon, 1948</p>							England
40369	Animalia		Arthropoda			Insecta			Hymenoptera			Ichneumonoidea	Braconidae	Alysiinae	Dacnusini		Dacnusa		aterrima				Thomson, 1895								England
40370	Animalia		Arthropoda			Insecta			Hymenoptera			Ichneumonoidea	Braconidae	Alysiinae	Dacnusini		Dacnusa		confinis				Ruthe, 1859	<p style="margin-left: 40px;"><i>minuta </i>(Curtis, 1826, <i>Alysia </i>)</p>							England, Wales, Ireland		Alysia minuta was listed as a species of Alysia by Shenefelt (1974) and Huddleston (1978) although a junior homonym of Alysia minuta Nees, 1812; Wharton (1986) showed it to belong to Dacnusa and van Achterberg (in litt.) concluded that it is conspecific with confinis.
40371	Animalia		Arthropoda			Insecta			Hymenoptera			Ichneumonoidea	Braconidae	Alysiinae	Dacnusini		Dacnusa		delphinii				Griffiths, 1967								England
40372	Animalia		Arthropoda			Insecta			Hymenoptera			Ichneumonoidea	Braconidae	Alysiinae	Dacnusini		Dacnusa		discolor				(Förster, 1863)	<p style="margin-left: 40px;"><i>Liposcia discolor </i>Förster, 1863</p><p style="margin-left: 40px;"><i>cercides </i>(Nixon, 1954, <i>Pachysema </i>)</p>							England, Scotland, Ireland
40373	Animalia		Arthropoda			Insecta			Hymenoptera			Ichneumonoidea	Braconidae	Alysiinae	Dacnusini		Dacnusa		dryas				(Nixon, 1948)	<p style="margin-left: 40px;"><i>Rhizarcha dryas </i>Nixon, 1948</p>							England
40374	Animalia		Arthropoda			Insecta			Hymenoptera			Ichneumonoidea	Braconidae	Alysiinae	Dacnusini		Dacnusa		ergeteles				(Nixon, 1954)	<p style="margin-left: 40px;"><i>Pachysema ergeteles </i>Nixon, 1954</p>							Ireland
40375	Animalia		Arthropoda			Insecta			Hymenoptera			Ichneumonoidea	Braconidae	Alysiinae	Dacnusini		Dacnusa		euphrasiella				Griffiths, 1984								Ireland		added by Griffiths (1984)
40376	Animalia		Arthropoda			Insecta			Hymenoptera			Ichneumonoidea	Braconidae	Alysiinae	Dacnusini		Dacnusa		evadne				Nixon, 1937								England, Scotland, Ireland
40377	Animalia		Arthropoda			Insecta			Hymenoptera			Ichneumonoidea	Braconidae	Alysiinae	Dacnusini		Dacnusa		faeroeensis				(Roman, 1917)	<p style="margin-left: 40px;"><i>Rhizarcha faeroeensis </i>Roman, 1917</p><p style="margin-left: 40px;"><i>lestes </i>Nixon, 1937</p>							England, Scotland, Wales, Ireland
40378	Animalia		Arthropoda			Insecta			Hymenoptera			Ichneumonoidea	Braconidae	Alysiinae	Dacnusini		Dacnusa		fasciata				Stelfox, 1954								Ireland
40379	Animalia		Arthropoda			Insecta			Hymenoptera			Ichneumonoidea	Braconidae	Alysiinae	Dacnusini		Dacnusa		hospita				(Förster, 1863)	<p style="margin-left: 40px;"><i>Aphanta hospita </i>Förster, 1863</p>							England, Scotland, Ireland
40380	Animalia		Arthropoda			Insecta			Hymenoptera			Ichneumonoidea	Braconidae	Alysiinae	Dacnusini		Dacnusa		laeta				(Nixon, 1954)	<p style="margin-left: 40px;"><i>Pachysema laeta </i>Nixon, 1954</p>							England, Scotland, Ireland
40381	Animalia		Arthropoda			Insecta			Hymenoptera			Ichneumonoidea	Braconidae	Alysiinae	Dacnusini		Dacnusa		laevipectus				Thomson, 1895	<p style="margin-left: 40px;"><i>nox </i>(Morley, 1924, <i>Rhizarcha </i>)</p>							England, Scotland, Wales, Ireland
40382	Animalia		Arthropoda			Insecta			Hymenoptera			Ichneumonoidea	Braconidae	Alysiinae	Dacnusini		Dacnusa		lissos				(Nixon, 1954)	<p style="margin-left: 40px;"><i>Pachysema lissos </i>Nixon, 1954</p>							England
40383	Animalia		Arthropoda			Insecta			Hymenoptera			Ichneumonoidea	Braconidae	Alysiinae	Dacnusini		Dacnusa		longiradialis				Nixon, 1937								England, Scotland, Ireland
40384	Animalia		Arthropoda			Insecta			Hymenoptera			Ichneumonoidea	Braconidae	Alysiinae	Dacnusini		Dacnusa		lugens				(Haliday, 1839)	<p style="margin-left: 40px;"><i>Alysia lugens </i>Haliday, 1839</p>							England, Ireland
40385	Animalia		Arthropoda			Insecta			Hymenoptera			Ichneumonoidea	Braconidae	Alysiinae	Dacnusini		Dacnusa		macrospila				(Haliday, 1839)	<p style="margin-left: 40px;"><i>Alysia macrospila </i>Haliday, 1839</p>							England, Scotland, Ireland
40386	Animalia		Arthropoda			Insecta			Hymenoptera			Ichneumonoidea	Braconidae	Alysiinae	Dacnusini		Dacnusa		maculipes				Thomson, 1895								England, Scotland, Wales, Ireland
40387	Animalia		Arthropoda			Insecta			Hymenoptera			Ichneumonoidea	Braconidae	Alysiinae	Dacnusini		Dacnusa		maxima				(Fischer, 1961)	<p style="margin-left: 40px;"><i>Pachysema maxima </i>Fischer, 1961</p>							Wales
40388	Animalia		Arthropoda			Insecta			Hymenoptera			Ichneumonoidea	Braconidae	Alysiinae	Dacnusini		Dacnusa		melicerta				(Nixon, 1954)	<p style="margin-left: 40px;"><i>Pachysema melicerta </i>Nixon, 1954</p><p style="margin-left: 40px;"><i>fumipes </i>Tobias, 1998</p>							England, Scotland, Ireland
40389	Animalia		Arthropoda			Insecta			Hymenoptera			Ichneumonoidea	Braconidae	Alysiinae	Dacnusini		Dacnusa		merope				(Nixon, 1948)	<p style="margin-left: 40px;"><i>Rhizarcha merope </i>Nixon, 1948</p>							England
40390	Animalia		Arthropoda			Insecta			Hymenoptera			Ichneumonoidea	Braconidae	Alysiinae	Dacnusini		Dacnusa		metula				(Nixon, 1954)	<p style="margin-left: 40px;"><i>Pachysema metula </i>Nixon, 1954</p>							England, Scotland, Ireland
40391	Animalia		Arthropoda			Insecta			Hymenoptera			Ichneumonoidea	Braconidae	Alysiinae	Dacnusini		Dacnusa		monticola				(Förster, 1863)	<p style="margin-left: 40px;"><i>Brachystropha monticola </i>Förster, 1863</p><p style="margin-left: 40px;"><i>mutia </i>(Nixon, 1948, <i>Rhizarcha </i>)</p><p style="margin-left: 40px;"><i>coracina </i>Stelfox, 1957</p>							Ireland
40392	Animalia		Arthropoda			Insecta			Hymenoptera			Ichneumonoidea	Braconidae	Alysiinae	Dacnusini		Dacnusa		nigrella				Griffiths, 1967								Scotland		added by Godfray &amp; Bland (2011)
40393	Animalia		Arthropoda			Insecta			Hymenoptera			Ichneumonoidea	Braconidae	Alysiinae	Dacnusini		Dacnusa		nigropygmaea				Stelfox, 1954								Ireland
40394	Animalia		Arthropoda			Insecta			Hymenoptera			Ichneumonoidea	Braconidae	Alysiinae	Dacnusini		Dacnusa		obesa				Stelfox, 1954								Scotland, Ireland
40395	Animalia		Arthropoda			Insecta			Hymenoptera			Ichneumonoidea	Braconidae	Alysiinae	Dacnusini		Dacnusa		ocyroe				Nixon, 1937								England, Scotland, Wales, Ireland
40396	Animalia		Arthropoda			Insecta			Hymenoptera			Ichneumonoidea	Braconidae	Alysiinae	Dacnusini		Dacnusa		plantaginis				Griffiths, 1967	<p style="margin-left: 40px;"><i>discolor </i>misident.</p>							England, Scotland, Wales, Ireland
40397	Animalia		Arthropoda			Insecta			Hymenoptera			Ichneumonoidea	Braconidae	Alysiinae	Dacnusini		Dacnusa		pubescens				(Curtis, 1826)	<p style="margin-left: 40px;"><i>Alysia pubescens </i>Curtis, 1826</p><p style="margin-left: 40px;"><i>exserens </i>(Nees, 1834, <i>Alysia </i>)</p>							England, Scotland, Ireland
40398	Animalia		Arthropoda			Insecta			Hymenoptera			Ichneumonoidea	Braconidae	Alysiinae	Dacnusini		Dacnusa		sibirica				Telenga, 1934								England, Scotland, Wales, Ireland
40399	Animalia		Arthropoda			Insecta			Hymenoptera			Ichneumonoidea	Braconidae	Alysiinae	Dacnusini		Dacnusa		comis				(Nixon, 1954)	<p style="margin-left: 40px;"><i>Pachysema comis </i>Nixon, 1954</p>
40400	Animalia		Arthropoda			Insecta			Hymenoptera			Ichneumonoidea	Braconidae	Alysiinae	Dacnusini		Dacnusa		soma				(Nixon, 1948)	<p style="margin-left: 40px;"><i>Rhizarcha soma </i>Nixon, 1948</p>							Scotland, Ireland
40401	Animalia		Arthropoda			Insecta			Hymenoptera			Ichneumonoidea	Braconidae	Alysiinae	Dacnusini		Dacnusa		stramineipes				(Haliday, 1839)	<p style="margin-left: 40px;"><i>Alysia stramineipes </i>Haliday, 1839</p><p style="margin-left: 40px;"><i>haemorrhoa </i>(Förster, 1863, <i>Tanystropha </i>)</p><p style="margin-left: 40px;"><i>longicauda </i>Thomson, 1895</p>							England, Scotland, Ireland		Dacnusa longicauda was synonymised by Nixon (1937) although this was overlooked by Huddleston (1978).
40402	Animalia		Arthropoda			Insecta			Hymenoptera			Ichneumonoidea	Braconidae	Alysiinae	Dacnusini		Dacnusa		tarsalis				Thomson, 1895	<p style="margin-left: 40px;"><i>nitetis </i>(Nixon, 1948, <i>Rhizarcha </i>)</p>							England, Scotland, Wales, Ireland
40403	Animalia		Arthropoda			Insecta			Hymenoptera			Ichneumonoidea	Braconidae	Alysiinae	Dacnusini		Dacnusa		temula				(Haliday, 1839)	<p style="margin-left: 40px;"><i>Alysia temula </i>Haliday, 1839</p>							England, Scotland, Ireland
40404	Animalia		Arthropoda			Insecta			Hymenoptera			Ichneumonoidea	Braconidae	Alysiinae	Dacnusini		Dacnusa		veronicae				Griffiths, 1967								England, Scotland
40405	Animalia		Arthropoda			Insecta			Hymenoptera			Ichneumonoidea	Braconidae	Alysiinae	Dacnusini		Epimicta						Förster, 1863
40406	Animalia		Arthropoda			Insecta			Hymenoptera			Ichneumonoidea	Braconidae	Alysiinae	Dacnusini		Epimicta		marginalis				(Haliday, 1839)	<p style="margin-left: 40px;"><i>Alysia marginalis </i>Haliday, 1839</p>							England, Ireland
40407	Animalia		Arthropoda			Insecta			Hymenoptera			Ichneumonoidea	Braconidae	Alysiinae	Dacnusini		Exotela						Förster, 1863	<p style="margin-left: 40px;"><i>MESORA </i>Förster, 1863</p><p style="margin-left: 40px;"><i>TOXELEA </i>Nixon, 1943</p><p style="margin-left: 40px;"><i>ANTRUSA </i>Nixon, 1943</p>									Griffiths’ (1964-68) concept of Exotela is followed here; the most plesiomorphic species (flavicoxa, interstitialis, melanocera and vaenia) are often placed in Antrusa (e.g. van Achterberg, 2014).
40408	Animalia		Arthropoda			Insecta			Hymenoptera			Ichneumonoidea	Braconidae	Alysiinae	Dacnusini		Exotela		cyclogaster				Förster, 1863	<p style="margin-left: 40px;"><i>bellina </i>(Nixon, 1937, <i>Dacnusa </i>)</p><p style="margin-left: 40px;"><i>umbellina </i>(Nixon, 1954, <i>Toxelea </i>)</p><p style="margin-left: 40px;"><i>sonchina </i>Griffiths, 1967</p>							England, Scotland, Wales, Ireland		Griffiths (1967b) divided cyclogaster into three subspecies, nominate cyclogaster, umbellina and sonchina. Tobias (1986) later treated these as separate species although Godfray (1984) argued that umbellina and cyclogaster are host race variants. Pending further research they are treated here as a single taxon.
40409	Animalia		Arthropoda			Insecta			Hymenoptera			Ichneumonoidea	Braconidae	Alysiinae	Dacnusini		Exotela		dives				(Nixon, 1954)	<p style="margin-left: 40px;"><i>Toxelea dives </i>Nixon, 1954</p>							Ireland
40410	Animalia		Arthropoda			Insecta			Hymenoptera			Ichneumonoidea	Braconidae	Alysiinae	Dacnusini		Exotela		flavicoxa				(Thomson, 1895)	<p style="margin-left: 40px;"><i>Dacnusa flavicoxa </i>Thomson, 1895</p>							England, Scotland, Ireland
40411	Animalia		Arthropoda			Insecta			Hymenoptera			Ichneumonoidea	Braconidae	Alysiinae	Dacnusini		Exotela		gilvipes				(Haliday, 1839)	<p style="margin-left: 40px;"><i>Alysia gilvipes </i>Haliday, 1839</p><p style="margin-left: 40px;"><i>albilabris </i>(Thomson, 1895, <i>Dacnusa </i>)</p>							England, Scotland, Ireland
40412	Animalia		Arthropoda			Insecta			Hymenoptera			Ichneumonoidea	Braconidae	Alysiinae	Dacnusini		Exotela		hera				(Nixon, 1937)	<p style="margin-left: 40px;"><i>Dacnusa hera </i>Nixon, 1937</p>							England, Scotland, Isle of Man
40413	Animalia		Arthropoda			Insecta			Hymenoptera			Ichneumonoidea	Braconidae	Alysiinae	Dacnusini		Exotela		interstitialis				(Thomson, 1895)	<p style="margin-left: 40px;"><i>Dacnusa interstitialis </i>Thomson, 1895</p><p style="margin-left: 40px;"><i>mamertes </i>(Nixon, 1943, <i>Dacnusa </i>)</p>									Placed in Chorebus by Tobias &amp; Jakimavicius (1973) and in Antrusa by Papp (2007); needs further research.
40414	Animalia		Arthropoda			Insecta			Hymenoptera			Ichneumonoidea	Braconidae	Alysiinae	Dacnusini		Exotela		lonicerae				Griffiths, 1967								England, Scotland
40415	Animalia		Arthropoda			Insecta			Hymenoptera			Ichneumonoidea	Braconidae	Alysiinae	Dacnusini		Exotela		melanocera				(Thomson, 1895)	<p style="margin-left: 40px;"><i>Dacnusa melanocera </i>Thomson, 1895</p><p style="margin-left: 40px;"><i>persimilis </i>(Nixon, 1954, <i>Antrusa </i>)</p>							England, Ireland
40416	Animalia		Arthropoda			Insecta			Hymenoptera			Ichneumonoidea	Braconidae	Alysiinae	Dacnusini		Exotela		phryne				(Nixon, 1954)	<p style="margin-left: 40px;"><i>Toxelea phryne </i>Nixon, 1954</p>							England, Scotland
40417	Animalia		Arthropoda			Insecta			Hymenoptera			Ichneumonoidea	Braconidae	Alysiinae	Dacnusini		Exotela		spinifer				(Nixon, 1954)	<p style="margin-left: 40px;"><i>Toxelea spinifer </i>Nixon, 1954</p>							England, Scotland, Ireland
40418	Animalia		Arthropoda			Insecta			Hymenoptera			Ichneumonoidea	Braconidae	Alysiinae	Dacnusini		Exotela		sulcata				(Tobias, 1962)	<p style="margin-left: 40px;"><i>Pachysema sulcata </i>Tobias, 1962</p>							England, Scotland, Ireland
40419	Animalia		Arthropoda			Insecta			Hymenoptera			Ichneumonoidea	Braconidae	Alysiinae	Dacnusini		Exotela		vaenia				(Nixon, 1954)	<p style="margin-left: 40px;"><i>Antrusa vaenia </i>Nixon, 1954</p>							England
40420	Animalia		Arthropoda			Insecta			Hymenoptera			Ichneumonoidea	Braconidae	Alysiinae	Dacnusini		Exotela		viciae				Griffiths, 1984								England		added by Griffiths (1984)
40421	Animalia		Arthropoda			Insecta			Hymenoptera			Ichneumonoidea	Braconidae	Alysiinae	Dacnusini		Laotris						Nixon, 1943
40422	Animalia		Arthropoda			Insecta			Hymenoptera			Ichneumonoidea	Braconidae	Alysiinae	Dacnusini		Laotris		striatula				(Haliday, 1839)	<p style="margin-left: 40px;"><i>Alysia striatula </i>Haliday, 1839</p>							England, Scotland, Ireland
40423	Animalia		Arthropoda			Insecta			Hymenoptera			Ichneumonoidea	Braconidae	Alysiinae	Dacnusini		Polemochartus						Nees, 1818
40424	Animalia		Arthropoda			Insecta			Hymenoptera			Ichneumonoidea	Braconidae	Alysiinae	Dacnusini		Polemochartus		liparae				(Giraud, 1863)	<p style="margin-left: 40px;"><i>Polemon liparae </i>Giraud, 1863</p>							England
40425	Animalia		Arthropoda			Insecta			Hymenoptera			Ichneumonoidea	Braconidae	Alysiinae	Dacnusini		Polemochartus		melas				(Giraud, 1863)	<p style="margin-left: 40px;"><i>Polemon melas </i>Giraud, 1863</p>							England		added by Shaw &amp; Jennings (2008)
40426	Animalia		Arthropoda			Insecta			Hymenoptera			Ichneumonoidea	Braconidae	Alysiinae	Dacnusini		Protodacnusa						Griffiths, 1964
40427	Animalia		Arthropoda			Insecta			Hymenoptera			Ichneumonoidea	Braconidae	Alysiinae	Dacnusini		Protodacnusa		litoralis				Griffiths, 1964								Ireland
40428	Animalia		Arthropoda			Insecta			Hymenoptera			Ichneumonoidea	Braconidae	Alysiinae	Dacnusini		Protodacnusa		tristis				(Nees, 1834)	<p style="margin-left: 40px;"><i>Alysia tristis </i>Nees, 1834</p><p style="margin-left: 40px;"><i>ampliator </i>(Haliday, 1839, <i>Alysia </i>) preocc.</p><p style="margin-left: 40px;"><i>longistigma </i>(Telenga, 1935, <i>Dacnusa </i>)</p>							England, Ireland
40429	Animalia		Arthropoda			Insecta			Hymenoptera			Ichneumonoidea	Braconidae	Alysiinae	Dacnusini		Sarops						Nixon, 1942
40430	Animalia		Arthropoda			Insecta			Hymenoptera			Ichneumonoidea	Braconidae	Alysiinae	Dacnusini		Sarops		rea				Nixon, 1942								England
40431	Animalia		Arthropoda			Insecta			Hymenoptera			Ichneumonoidea	Braconidae	Alysiinae	Dacnusini		Synelix						Förster, 1863	<p style="margin-left: 40px;"><i>ECTILIS </i>Nixon, 1943</p>
40432	Animalia		Arthropoda			Insecta			Hymenoptera			Ichneumonoidea	Braconidae	Alysiinae	Dacnusini		Synelix		semirugosa				(Haliday, 1839)	<p style="margin-left: 40px;"><i>Alysia semirugosa </i>Haliday, 1839</p><p style="margin-left: 40px;"><i>agnata </i>Förster, 1863</p><p style="margin-left: 40px;"><i>amaurosomae </i>(Telenga, 1935, <i>Dacnusa </i>)</p>							England, Scotland, Wales, Ireland
40433	Animalia		Arthropoda			Insecta			Hymenoptera			Ichneumonoidea	Braconidae	Alysiinae	Dacnusini		Tates						Nixon, 1943
40434	Animalia		Arthropoda			Insecta			Hymenoptera			Ichneumonoidea	Braconidae	Alysiinae	Dacnusini		Tates		heterocera				(Thomson, 1895)	<p style="margin-left: 40px;"><i>Dacnusa heterocera </i>Thomson, 1895</p>							England, Scotland
40435	Animalia		Arthropoda			Insecta			Hymenoptera			Ichneumonoidea	Braconidae	Alysiinae	Dacnusini		Trachionus						Haliday, 1833
40436	Animalia		Arthropoda			Insecta			Hymenoptera			Ichneumonoidea	Braconidae	Alysiinae	Dacnusini		Trachionus	Trachionus					Haliday, 1833	<p style="margin-left: 40px;"><i>AENONE </i>Curtis, 1837 preocc.</p><p style="margin-left: 40px;"><i>AENONE </i>Haliday, 1838 preocc., nom. nud.</p><p style="margin-left: 40px;"><i>OENONE </i>Haliday, 1839 preocc.</p><p style="margin-left: 40px;"><i>SYMPHYA </i>Förster, 1863</p><p style="margin-left: 40px;"><i>ANARMUS </i>Ruthe, 1882</p>									Generic synonymy follows van Achterberg (1997)
40437	Animalia		Arthropoda			Insecta			Hymenoptera			Ichneumonoidea	Braconidae	Alysiinae	Dacnusini		Trachionus	Trachionus	mandibularis				(Nees, 1816)	<p style="margin-left: 40px;"><i>Sigalphus mandibularis </i>Nees, 1816</p>							England, Wales, Ireland
40438	Animalia		Arthropoda			Insecta			Hymenoptera			Ichneumonoidea	Braconidae	Alysiinae	Dacnusini		Trachionus	Planiricus					Perepechayenko, 2000
40439	Animalia		Arthropoda			Insecta			Hymenoptera			Ichneumonoidea	Braconidae	Alysiinae	Dacnusini		Trachionus	Planiricus	hians				(Nees, 1816)	<p style="margin-left: 40px;"><i>Sigalphus hians </i>Nees, 1816</p>							England, Scotland, Ireland
40440	Animalia		Arthropoda			Insecta			Hymenoptera			Ichneumonoidea	Braconidae	Alysiinae	Dacnusini		Trachionus	Planiricus	ringens				(Haliday, 1839)	<p style="margin-left: 40px;"><i>Alysia ringens </i>Haliday, 1839</p>							England, Scotland, Ireland
40441	Animalia		Arthropoda			Insecta			Hymenoptera			Ichneumonoidea	Braconidae	Aphidiinae									Haliday, 1833										In the older literature (and some very recent literature) often treated as a separate family (i.e. Aphidiidae) within Ichneumonoidea. Some distribution data from Mackauer (1961), Starý (1978) and Baker (2013).
40442	Animalia		Arthropoda			Insecta			Hymenoptera			Ichneumonoidea	Braconidae	Aphidiinae	Aphidiini								Haliday, 1833
40443	Animalia		Arthropoda			Insecta			Hymenoptera			Ichneumonoidea	Braconidae	Aphidiinae	Aphidiini		Adialytus						Förster, 1863
40444	Animalia		Arthropoda			Insecta			Hymenoptera			Ichneumonoidea	Braconidae	Aphidiinae	Aphidiini		Adialytus		ambiguus				(Haliday, 1834)	<p style="margin-left: 40px;"><i>Aphidius ambiguus </i>Haliday, 1834</p><p style="margin-left: 40px;"><i>diminuens </i>(Nees, 1834, <i>Aphidius</i>)</p><p style="margin-left: 40px;"><i>?exiguus </i>(Haliday, 1834, <i>Aphidius</i>)</p><p style="margin-left: 40px;"><i>delhiensis </i>(Subba Rao &amp; Sharma, 1960, <i>Aphidius</i>)</p><p style="margin-left: 40px;"><i>arvicola </i>(Starý, 1961, <i>Lys…							Scotland, Wales		The type of exiguus is lost (van Achterberg, 1997).
40445	Animalia		Arthropoda			Insecta			Hymenoptera			Ichneumonoidea	Braconidae	Aphidiinae	Aphidiini		Adialytus		salicaphis				(Fitch, 1855)	<p style="margin-left: 40px;"><i>Trioxys salicaphis </i>Fitch, 1855</p><p style="margin-left: 40px;"><i>populaphis </i>(Fitch, 1855, <i>Trioxys</i>)</p><p style="margin-left: 40px;"><i>tenuis </i>Förster, 1863</p><p style="margin-left: 40px;"><i>salicaphidis </i>(Ashmead, 1889, <i>Lipolexis</i>)</p><p style="margin-left: 40px;"><i>laticephalus </i>(Telenga, 1953, <i>Aphidius</i>)</p>							England, Wales		added by Baker &amp; Broad (2009)
40446	Animalia		Arthropoda			Insecta			Hymenoptera			Ichneumonoidea	Braconidae	Aphidiinae	Aphidiini		Aphidius						Nees, 1818	<p style="margin-left: 40px;"><i>INCUBUS </i>Schrank, 1802 nom. ob.</p><p style="margin-left: 40px;"><i>THERACMION </i>Holmgren, 1872</p><p style="margin-left: 40px;"><i>EUAPHIDIUS </i>Mackauer, 1961</p>									doubtfully placed species of Aphidius: [constrictus (Nees, 1811, Bracon)] Included as a British species by Lyle (1933) on the basis of Szépligeti’s (1904) Palaearctic catalogue; the type is lost and the species has not been interpreted by recent authors. [dimidiatus Curtis, 1831] [pallidinotus Haliday, 1834 nom. nud.] [pseudoplatanus Curtis, 1837 constrictus misident.] There have been no referenc…
40447	Animalia		Arthropoda			Insecta			Hymenoptera			Ichneumonoidea	Braconidae	Aphidiinae	Aphidiini		Aphidius		absinthii				Marshall, 1896								England		Treated as a valid species of Aphidius by Rakhshani et al. (2011) rather than a synonym of asteris.
40448	Animalia		Arthropoda			Insecta			Hymenoptera			Ichneumonoidea	Braconidae	Aphidiinae	Aphidiini		Aphidius		aquilus				Mackauer, 1961	<p style="margin-left: 40px;"><i>sicarius </i>Mackauer, 1961</p><p style="margin-left: 40px;"><i>callipterinellae </i>(Takada, 1966, <i>Lysaphidus</i>)</p>							England, Wales
40449	Animalia		Arthropoda			Insecta			Hymenoptera			Ichneumonoidea	Braconidae	Aphidiinae	Aphidiini		Aphidius		asteris				Haliday, 1834	<p style="margin-left: 40px;"><i>melanocephalus </i>(Nees, 1811, <i>Bracon</i>)</p><p style="margin-left: 40px;"><i>lutescens </i>Haliday, 1834</p><p style="margin-left: 40px;"><i>commodus </i>Gahan, 1926</p><p style="margin-left: 40px;"><i>artemisiae </i>Ivanov, 1927</p>							England, Wales
40450	Animalia		Arthropoda			Insecta			Hymenoptera			Ichneumonoidea	Braconidae	Aphidiinae	Aphidiini		Aphidius		avenae				Haliday, 1834	<p style="margin-left: 40px;"><i>picipes </i>(Nees, 1811, <i>Bracon</i>) suppressed</p><p style="margin-left: 40px;"><i>crithmi </i>Marshall, 1896</p><p style="margin-left: 40px;"><i>granarius </i>Marshall, 1896</p><p style="margin-left: 40px;"><i>pascuorum </i>Marshall, 1896</p><p style="margin-left: 40px;"><i>hungaricus </i>(Györfi, 1958, <i>Lysiphlebus</i>)</p><p style="margin-left: 40px;"><i>…							England, Wales, Ireland
40451	Animalia		Arthropoda			Insecta			Hymenoptera			Ichneumonoidea	Braconidae	Aphidiinae	Aphidiini		Aphidius		cingulatus				Ruthe, 1859	<p style="margin-left: 40px;"><i>arcticus </i>(Holmgren, 1872, <i>Theracmion</i>)</p><p style="margin-left: 40px;"><i>gregarius </i>Marshall, 1872</p><p style="margin-left: 40px;"><i>lachni </i>Ashmead, 1889</p><p style="margin-left: 40px;"><i>pterocommae </i>Ashmead, 1889</p><p style="margin-left: 40px;"><i>pterocommae </i>Marshall, 1896 preocc.</p><p style="margin-left: 40px;"><i>luzhetzki </i>…							England, Wales
40452	Animalia		Arthropoda			Insecta			Hymenoptera			Ichneumonoidea	Braconidae	Aphidiinae	Aphidiini		Aphidius		#colemani				Viereck, 1912	<p style="margin-left: 40px;"><i>huebrichi </i>Brèthes, 1913</p><p style="margin-left: 40px;"><i>platensis </i>Brèthes, 1913</p><p style="margin-left: 40px;"><i>porteri </i>Brèthes, 1915</p><p style="margin-left: 40px;"><i>aphidiphilus </i>Benoit, 1955</p><p style="margin-left: 40px;"><i>leroyi </i>Benoit, 1955</p><p style="margin-left: 40px;"><i>transcaspicus </i>Telenga, 1958</p>									Introduced into greenhouses for biocontrol (Starý, 1975).
40453	Animalia		Arthropoda			Insecta			Hymenoptera			Ichneumonoidea	Braconidae	Aphidiinae	Aphidiini		Aphidius		eadyi				Starý, Gonzalez &amp; Hall, 1980	<p style="margin-left: 40px;"><i>urticae </i>misident.</p>							England		added by Müller et al. (1999)
40454	Animalia		Arthropoda			Insecta			Hymenoptera			Ichneumonoidea	Braconidae	Aphidiinae	Aphidiini		Aphidius		eglanteriae				Haliday, 1834
40455	Animalia		Arthropoda			Insecta			Hymenoptera			Ichneumonoidea	Braconidae	Aphidiinae	Aphidiini		Aphidius		ervi				Haliday, 1834	<p style="margin-left: 40px;"><i>infirmus </i>(Nees, 1811, <i>Bracon</i>)</p><p style="margin-left: 40px;"><i>ulmi </i>Marshall, 1896</p><p style="margin-left: 40px;"><i>medicaginis </i>Marshall, 1898</p><p style="margin-left: 40px;"><i>fumipennis </i>Györfi, 1958</p><p style="margin-left: 40px;"><i>nigrescens </i>Mackauer, 1962</p><p style="margin-left: 40px;"><i>mirotarsi </i>Starý, 1963</p>							England, Wales, Ireland
40456	Animalia		Arthropoda			Insecta			Hymenoptera			Ichneumonoidea	Braconidae	Aphidiinae	Aphidiini		Aphidius		fumatus				Haliday, 1834
40457	Animalia		Arthropoda			Insecta			Hymenoptera			Ichneumonoidea	Braconidae	Aphidiinae	Aphidiini		Aphidius		funebris				Mackauer, 1961	<p style="margin-left: 40px;"><i>cirsii </i>Ivanov, 1925 preocc.</p><p style="margin-left: 40px;"><i>bispinosus </i>Telenga, 1958</p><p style="margin-left: 40px;"><i>eriophori </i>Mackauer, 1967</p>							England, Wales		added by Pennacchio (1989)
40458	Animalia		Arthropoda			Insecta			Hymenoptera			Ichneumonoidea	Braconidae	Aphidiinae	Aphidiini		Aphidius		hortensis				Marshall, 1896	<p style="margin-left: 40px;"><i>berberidis </i>Smith, 1944</p>							England, Wales
40459	Animalia		Arthropoda			Insecta			Hymenoptera			Ichneumonoidea	Braconidae	Aphidiinae	Aphidiini		Aphidius		matricariae				Haliday, 1834	<p style="margin-left: 40px;"><i>arundinis </i>Haliday, 1834</p><p style="margin-left: 40px;"><i>cirsii </i>Haliday, 1834 preocc.</p><p style="margin-left: 40px;"><i>phorodontis </i>Ashmead, 1889</p><p style="margin-left: 40px;"><i>chrysanthemi </i>Marshall, 1896</p><p style="margin-left: 40px;"><i>lychnidis </i>Marshall, 1896</p><p style="margin-left: 40px;"><i>polygoni </i>Marshall, 1896</p><p …							England, Wales, Ireland
40460	Animalia		Arthropoda			Insecta			Hymenoptera			Ichneumonoidea	Braconidae	Aphidiinae	Aphidiini		Aphidius		microlophii				Pennacchio &amp; Tremblay, 1987								England, Wales		added by Pennacchio (1989); also recorded by Müller et al. (1999).
40461	Animalia		Arthropoda			Insecta			Hymenoptera			Ichneumonoidea	Braconidae	Aphidiinae	Aphidiini		Aphidius		rhopalosiphi				de Stefani-Perez, 1902	<p style="margin-left: 40px;"><i>equiseticola </i>Starý, 1963</p><p style="margin-left: 40px;"><i>poacearum </i>Starý, 1963</p>							England
40462	Animalia		Arthropoda			Insecta			Hymenoptera			Ichneumonoidea	Braconidae	Aphidiinae	Aphidiini		Aphidius		ribis				Haliday, 1834	<p style="margin-left: 40px;"><i>ribaphidis </i>(Ashmead, 1889, <i>Lysiphlebus</i>)</p><p style="margin-left: 40px;"><i>scabiosae </i>Marshall, 1896</p><p style="margin-left: 40px;"><i>ribis </i>Ashmead, 1898 preocc.</p>							England
40463	Animalia		Arthropoda			Insecta			Hymenoptera			Ichneumonoidea	Braconidae	Aphidiinae	Aphidiini		Aphidius		rosae				Haliday, 1833	<p style="margin-left: 40px;"><i>aphidum </i>(Linnaeus, 1758, <i>Ichneumon</i>) nom. ob.</p><p style="margin-left: 40px;"><i>aphidator </i>(Thunberg, 1824, <i>Ichneumon</i>) nom. ob.</p><p style="margin-left: 40px;"><i>rosae </i>Curtis, 1831 nom. nud.</p><p style="margin-left: 40px;"><i>protaeus </i>Wesmael, 1835</p><p style="margin-left: 40px;"><i>rosarum </i>Nees, 1834</p><p style="margin-left:…							England, Wales, Ireland
40464	Animalia		Arthropoda			Insecta			Hymenoptera			Ichneumonoidea	Braconidae	Aphidiinae	Aphidiini		Aphidius		rubi				Starý, 1962								England		added by Müller et al. (1999); Belshaw (appendix in Müller et al., 1999) demonstrates that this species should be treated as separate from urticae.
40465	Animalia		Arthropoda			Insecta			Hymenoptera			Ichneumonoidea	Braconidae	Aphidiinae	Aphidiini		Aphidius		salicis				Haliday, 1834	<p style="margin-left: 40px;"><i>restrictus </i>Nees, 1834</p><p style="margin-left: 40px;"><i>duodecimarticulatus </i>Ratzeburg, 1852</p><p style="margin-left: 40px;"><i>dauci </i>Marshall, 1896</p>							England, Wales
40466	Animalia		Arthropoda			Insecta			Hymenoptera			Ichneumonoidea	Braconidae	Aphidiinae	Aphidiini		Aphidius		setiger				(Mackauer, 1961)	<p style="margin-left: 40px;"><i>Euaphidius setiger </i>Mackauer, 1961</p><p style="margin-left: 40px;"><i>aceri </i>Ivanov, 1925</p>							Wales		added by Baker &amp; Broad (2009)
40467	Animalia		Arthropoda			Insecta			Hymenoptera			Ichneumonoidea	Braconidae	Aphidiinae	Aphidiini		Aphidius		sonchi				Marshall, 1896								England, Wales
40468	Animalia		Arthropoda			Insecta			Hymenoptera			Ichneumonoidea	Braconidae	Aphidiinae	Aphidiini		Aphidius		tanacetarius				Mackauer, 1962	<p style="margin-left: 40px;"><i>tanaceti </i>Curtis, 1837 nom. nud.</p><p style="margin-left: 40px;"><i>tanaceticola </i>Starý, 1963</p>									Belokobylskij et al. (2003) treat tanacetarius as the valid name for tanaceti, which is a nomen nudum. This species has not been listed as British since its original description (Curtis, 1837) and Smith’s (1853) catalogue. Pungerl (1986) treated tanacetarius as a valid species but did not see any British or Irish material.
40469	Animalia		Arthropoda			Insecta			Hymenoptera			Ichneumonoidea	Braconidae	Aphidiinae	Aphidiini		Aphidius		urticae				Haliday, 1834	<p style="margin-left: 40px;"><i>euphorbiae </i>Marshall, 1896</p><p style="margin-left: 40px;"><i>longulus </i>Marshall, 1896</p><p style="margin-left: 40px;"><i>lonicerae </i>Marshall, 1896</p><p style="margin-left: 40px;"><i>silenes </i>Marshall, 1896</p><p style="margin-left: 40px;"><i>goidanichi </i>Quilis, 1932</p><p style="margin-left: 40px;"><i>ivanovae </i>Telenga, 1958</p><p style="marg…							England
40470	Animalia		Arthropoda			Insecta			Hymenoptera			Ichneumonoidea	Braconidae	Aphidiinae	Aphidiini		Aphidius		uzbekistanicus				Luzhetski, 1960	<p style="margin-left: 40px;"><i>urticae </i>misident.</p><p style="margin-left: 40px;"><i>?beltrani </i>Quilis, 1931</p><p style="margin-left: 40px;"><i>?indivisus </i>Quilis, 1931</p><p style="margin-left: 40px;"><i>?macropterus </i>Quilis, 1931</p><p style="margin-left: 40px;"><i>?pailloti </i>Quilis, 1931</p><p style="margin-left: 40px;"><i>impressus </i>Mackauer, 1965</p>							England		Aphidius beltrani is a possible senior synonym of uzbekistanicus (Starý, 1973).
40471	Animalia		Arthropoda			Insecta			Hymenoptera			Ichneumonoidea	Braconidae	Aphidiinae	Aphidiini		Betuloxys						Mackauer, 1960
40472	Animalia		Arthropoda			Insecta			Hymenoptera			Ichneumonoidea	Braconidae	Aphidiinae	Aphidiini		Betuloxys		compressicornis				(Ruthe, 1859)	<p style="margin-left: 40px;"><i>Trioxys compressicornis </i>Ruthe, 1859</p><p style="margin-left: 40px;"><i>testaceus </i>(Stelfox, 1948, <i>Trioxys</i>)</p>							England, Wales, Ireland
40473	Animalia		Arthropoda			Insecta			Hymenoptera			Ichneumonoidea	Braconidae	Aphidiinae	Aphidiini		Binodoxys						Mackauer, 1960	<p style="margin-left: 40px;"><i>MISAPHIDUS </i>Rondani, 1848 nom. ob.</p>									In Belokobylskij et al. (2003), van Achterberg listed these species under the genus name Misaphidus but, according to van Achterberg (pers. comm.), Misaphidus Rondani, 1848 s.l. (type-species: Misaphidus crudelis Rondani, 1848 (= Aphidius centaureae Haliday, 1833)) is a ‘nomen oblitum’ according to Article 23.9 of ICZN.
40474	Animalia		Arthropoda			Insecta			Hymenoptera			Ichneumonoidea	Braconidae	Aphidiinae	Aphidiini		Binodoxys		acalephae				(Marshall, 1896)	<p style="margin-left: 40px;"><i>Aphidius acalephae </i>Marshall, 1896</p><p style="margin-left: 40px;"><i>rietscheli </i>(Mackauer, 1959, <i>Trioxys</i>)</p><p style="margin-left: 40px;"><i>urticae </i>(Mackauer, 1959, <i>Trioxys</i>)</p>							England
40475	Animalia		Arthropoda			Insecta			Hymenoptera			Ichneumonoidea	Braconidae	Aphidiinae	Aphidiini		Binodoxys		angelicae				(Haliday, 1833)	<p style="margin-left: 40px;"><i>Aphidius angelicae </i>Haliday, 1833</p><p style="margin-left: 40px;"><i>placidus </i>(Gautier, 1922, <i>Trioxys</i>)</p><p style="margin-left: 40px;"><i>boscai </i>(Quilis, 1931, <i>Trioxys</i>)</p><p style="margin-left: 40px;"><i>fumariae </i>(Quilis, 1931, <i>Trioxys</i>)</p><p style="margin-left: 40px;"><i>granatensis </i>(Quilis, 1931, <i>Trioxys</i>)</p><p s…							Wales
40476	Animalia		Arthropoda			Insecta			Hymenoptera			Ichneumonoidea	Braconidae	Aphidiinae	Aphidiini		Binodoxys		brevicornis				(Haliday, 1833)	<p style="margin-left: 40px;"><i>Aphidius brevicornis </i>Haliday, 1833</p><p style="margin-left: 40px;"><i>minutus </i>(Haliday, 1833, <i>Aphidius</i>)</p>							Wales, Ireland
40477	Animalia		Arthropoda			Insecta			Hymenoptera			Ichneumonoidea	Braconidae	Aphidiinae	Aphidiini		Binodoxys		centaureae				(Haliday, 1833)	<p style="margin-left: 40px;"><i>Aphidius centaureae </i>Haliday, 1833</p><p style="margin-left: 40px;"><i>crudelis </i>(Rondani, 1848, <i>Misaphidus</i>)</p><p style="margin-left: 40px;"><i>orientalis </i>(Starý &amp; Schlinger, 1967, <i>Trioxys</i>)</p><p style="margin-left: 40px;"><i>uroleucon </i>Takada &amp; Rishi, 1980</p>							England, Scotland, Wales, Ireland
40478	Animalia		Arthropoda			Insecta			Hymenoptera			Ichneumonoidea	Braconidae	Aphidiinae	Aphidiini		Binodoxys		heraclei				(Haliday, 1833)	<p style="margin-left: 40px;"><i>Aphidius heraclei </i>Haliday, 1833</p><p style="margin-left: 40px;"><i>obsoletus </i>(Wesmael, 1835, <i>Aphidius</i>)</p><p style="margin-left: 40px;"><i>variegator </i>(Szépligeti, 1898, <i>Trioxys</i>)</p>							Wales
40479	Animalia		Arthropoda			Insecta			Hymenoptera			Ichneumonoidea	Braconidae	Aphidiinae	Aphidiini		Binodoxys		letifer				(Haliday, 1833)	<p style="margin-left: 40px;"><i>Aphidius letifer </i>Haliday, 1833</p>							Ireland
40480	Animalia		Arthropoda			Insecta			Hymenoptera			Ichneumonoidea	Braconidae	Aphidiinae	Aphidiini		Diaeretellus						Starý, 1960
40481	Animalia		Arthropoda			Insecta			Hymenoptera			Ichneumonoidea	Braconidae	Aphidiinae	Aphidiini		Diaeretellus		ephippium				(Haliday, 1834)	<p style="margin-left: 40px;"><i>Aphidius ephippium </i>Haliday, 1834</p>							England, Ireland
40482	Animalia		Arthropoda			Insecta			Hymenoptera			Ichneumonoidea	Braconidae	Aphidiinae	Aphidiini		Diaeretiella						Starý, 1960
40483	Animalia		Arthropoda			Insecta			Hymenoptera			Ichneumonoidea	Braconidae	Aphidiinae	Aphidiini		Diaeretiella		rapae				(McIntosh, 1855)	<p style="margin-left: 40px;"><i>Aphidius rapae </i>McIntosh, 1855</p><p style="margin-left: 40px;"><i>vulgaris </i>(Bouché, 1834, <i>Aphidius</i>)</p><p style="margin-left: 40px;"><i>rapae </i>(Curtis, 1860, <i>Aphidius</i>) preocc.</p><p style="margin-left: 40px;"><i>chenopodii </i>(Förster, 1867, <i>Diaeretus</i>) nom. nud.</p><p style="margin-left: 40px;"><i>halticae </i>(Rondani, 1877, <i>Mi…							England, Wales
40484	Animalia		Arthropoda			Insecta			Hymenoptera			Ichneumonoidea	Braconidae	Aphidiinae	Aphidiini		Diaeretus						Förster, 1863
40485	Animalia		Arthropoda			Insecta			Hymenoptera			Ichneumonoidea	Braconidae	Aphidiinae	Aphidiini		Diaeretus		leucopterus				(Haliday, 1834)	<p style="margin-left: 40px;"><i>Aphidius leucopterus </i>Haliday, 1834</p><p style="margin-left: 40px;"><i>exspectatus </i>(Gautier &amp; Bonnamour, 1936, <i>Aphidius</i>)</p>							England, Wales
40486	Animalia		Arthropoda			Insecta			Hymenoptera			Ichneumonoidea	Braconidae	Aphidiinae	Aphidiini		Harkeria						Cameron, 1900	<p style="margin-left: 40px;"><i>PARAMONOCTONUS </i>Starý, 1959</p>
40487	Animalia		Arthropoda			Insecta			Hymenoptera			Ichneumonoidea	Braconidae	Aphidiinae	Aphidiini		Harkeria		rufa				Cameron, 1900								England		Distribution from van Achterberg (1989), who elevated Harkeria from a subgenus of Monoctonus.
40488	Animalia		Arthropoda			Insecta			Hymenoptera			Ichneumonoidea	Braconidae	Aphidiinae	Aphidiini		Lipolexis						Förster, 1863	<p style="margin-left: 40px;"><i>GYNOCRYPTUS </i>Quilis, 1931</p>
40489	Animalia		Arthropoda			Insecta			Hymenoptera			Ichneumonoidea	Braconidae	Aphidiinae	Aphidiini		Lipolexis		gracilis				Förster, 1863	<p style="margin-left: 40px;"><i>palpator </i>(Gautier &amp; Bonnamour, 1931, <i>Aphidius</i>)</p><p style="margin-left: 40px;"><i>pieltaini </i>(Quilis, 1931, <i>Gynocryptus</i>)</p><p style="margin-left: 40px;"><i>chinensis </i>Chen, 1980</p>							England		BMNH, det. Torrance &amp; Broad, added here
40490	Animalia		Arthropoda			Insecta			Hymenoptera			Ichneumonoidea	Braconidae	Aphidiinae	Aphidiini		Lysaphidus						Smith, 1944
40491	Animalia		Arthropoda			Insecta			Hymenoptera			Ichneumonoidea	Braconidae	Aphidiinae	Aphidiini		Lysaphidus		schimitscheki				Starý, 1960								England
40492	Animalia		Arthropoda			Insecta			Hymenoptera			Ichneumonoidea	Braconidae	Aphidiinae	Aphidiini		Lysaphidus						Förster, 1863
40493	Animalia		Arthropoda			Insecta			Hymenoptera			Ichneumonoidea	Braconidae	Aphidiinae	Aphidiini		Lysiphlebus	Lysiphlebus					Förster, 1863	<p style="margin-left: 40px;"><i>PLATYCYPHUS </i>Mackauer, 1960</p>
40494	Animalia		Arthropoda			Insecta			Hymenoptera			Ichneumonoidea	Braconidae	Aphidiinae	Aphidiini		Lysiphlebus	Lysiphlebus	dissolutus				(Nees, 1811)	<p style="margin-left: 40px;"><i>Bracon dissolutus </i>Nees, 1811</p><p style="margin-left: 40px;"><i>macrocornis </i>Mackauer, 1960</p>							England
40495	Animalia		Arthropoda			Insecta			Hymenoptera			Ichneumonoidea	Braconidae	Aphidiinae	Aphidiini		Lysiphlebus	Phlebus					Starý, 1975	<p style="margin-left: 40px;"><i>APHIDARIA </i>Provancher, 1888 preocc.</p>
40496	Animalia		Arthropoda			Insecta			Hymenoptera			Ichneumonoidea	Braconidae	Aphidiinae	Aphidiini		Lysiphlebus	Phlebus	confusus				Tremblay &amp; Eady, 1978								England, Wales		BMNH, added here on the basis of specimens in BMNH, identified by R.D. Eady as ambiguus sensu Mackauer and Starý nec Haliday, later described by Tremblay &amp; Eady (1978) as a separate species, confusus, the true ambiguus belonging in Adialytus.
40497	Animalia		Arthropoda			Insecta			Hymenoptera			Ichneumonoidea	Braconidae	Aphidiinae	Aphidiini		Lysiphlebus	Phlebus	fabarum				(Marshall, 1896)	<p style="margin-left: 40px;"><i>Aphidius fabarum </i>Marshall, 1896</p><p style="margin-left: 40px;"><i>aphidiperda </i>(Rondani, 1877, <i>Misaphidus</i>)</p><p style="margin-left: 40px;"><i>monilicornis </i>(Thomson, 1895, <i>Aphidius</i>)</p><p style="margin-left: 40px;"><i>cardui </i>(Marshall, 1896, <i>Aphidius</i>)</p><p style="margin-left: 40px;"><i>aurantii </i>(Pierantoni, 1907, <i>Aphid…							England, Wales
40498	Animalia		Arthropoda			Insecta			Hymenoptera			Ichneumonoidea	Braconidae	Aphidiinae	Aphidiini		Monoctonia						Starý, 1962
40499	Animalia		Arthropoda			Insecta			Hymenoptera			Ichneumonoidea	Braconidae	Aphidiinae	Aphidiini		Monoctonia		vesicarii				Tremblay, 1991								England		added by Rakhshani et al. (2015)
40500	Animalia		Arthropoda			Insecta			Hymenoptera			Ichneumonoidea	Braconidae	Aphidiinae	Aphidiini		Monoctonus						Haliday, 1833
40501	Animalia		Arthropoda			Insecta			Hymenoptera			Ichneumonoidea	Braconidae	Aphidiinae	Aphidiini		Monoctonus	Falciconus					Mackauer, 1961
40502	Animalia		Arthropoda			Insecta			Hymenoptera			Ichneumonoidea	Braconidae	Aphidiinae	Aphidiini		Monoctonus	Falciconus	pseudoplatani				(Marshall, 1896)	<p style="margin-left: 40px;"><i>Aphidius pseudoplatani </i>Marshall, 1896</p>							England, Wales
40503	Animalia		Arthropoda			Insecta			Hymenoptera			Ichneumonoidea	Braconidae	Aphidiinae	Aphidiini		Monoctonus	Monoctonus					Haliday, 1833
40504	Animalia		Arthropoda			Insecta			Hymenoptera			Ichneumonoidea	Braconidae	Aphidiinae	Aphidiini		Monoctonus	Monoctonus	caricis				(Haliday, 1833)	<p style="margin-left: 40px;"><i>Aphidius caricis </i>Haliday, 1833</p>							England, Wales
40505	Animalia		Arthropoda			Insecta			Hymenoptera			Ichneumonoidea	Braconidae	Aphidiinae	Aphidiini		Monoctonus	Monoctonus	cerasi				(Marshall, 1896)	<p style="margin-left: 40px;"><i>Aphidius cerasi </i>Marshall, 1896</p>							England
40506	Animalia		Arthropoda			Insecta			Hymenoptera			Ichneumonoidea	Braconidae	Aphidiinae	Aphidiini		Monoctonus	Monoctonus	crepidis				(Haliday, 1834)	<p style="margin-left: 40px;"><i>Aphidius crepidis </i>Haliday, 1834</p><p style="margin-left: 40px;"><i>tuberculatus </i>(Wesmael, 1835, <i>Aphidius</i>)</p><p style="margin-left: 40px;"><i>paludum </i>Marshall, 1896</p>							England, Wales
40507	Animalia		Arthropoda			Insecta			Hymenoptera			Ichneumonoidea	Braconidae	Aphidiinae	Aphidiini		Monoctonus	Monoctonus	ligustri				van Achterberg, 1989								England, Wales		added by van Achterberg (1989)
40508	Animalia		Arthropoda			Insecta			Hymenoptera			Ichneumonoidea	Braconidae	Aphidiinae	Aphidiini		Monoctonus	Monoctonus	nervosus				(Haliday, 1833)	<p style="margin-left: 40px;"><i>Aphidius nervosus </i>Haliday, 1833</p><p style="margin-left: 40px;"><i>paulensis </i>(Ashmead, 1902, <i>Aphidius</i>)</p><p style="margin-left: 40px;"><i>secundus </i>Viereck, 1915</p><p style="margin-left: 40px;"><i>biroi </i>Györfi, 1958</p><p style="margin-left: 40px;"><i>breviantennalis </i>Starý, 1959</p>
40509	Animalia		Arthropoda			Insecta			Hymenoptera			Ichneumonoidea	Braconidae	Aphidiinae	Aphidiini		Paralipsis						Förster, 1863	<p style="margin-left: 40px;"><i>Myrmecobosca </i>Maneval, 1940</p>
40510	Animalia		Arthropoda			Insecta			Hymenoptera			Ichneumonoidea	Braconidae	Aphidiinae	Aphidiini		Paralipsis		enervis				(Nees, 1834)	<p style="margin-left: 40px;"><i>Aphidius enervis </i>Nees, 1834</p><p style="margin-left: 40px;"><i>mandibularis </i>(Maneval, 1940, <i>Myrmecobosca</i>)</p><p style="margin-left: 40px;"><i>linnei </i>(Hincks, 1949, <i>Myrmecobosca</i>)</p>							England, Wales
40511	Animalia		Arthropoda			Insecta			Hymenoptera			Ichneumonoidea	Braconidae	Aphidiinae	Aphidiini		Pauesia						Quilis Pérez, 1931
40512	Animalia		Arthropoda			Insecta			Hymenoptera			Ichneumonoidea	Braconidae	Aphidiinae	Aphidiini		Pauesia	Paraphidius					Starý,1958										species of Pauesia (Paraphidius) excluded from the British and Irish list: [silvestris (Starý, 1960, Paraphidius)] added by Enobakhare (2001) but we do not know where Enobokhare’s material is deposited and the identification needs to be checked.
40513	Animalia		Arthropoda			Insecta			Hymenoptera			Ichneumonoidea	Braconidae	Aphidiinae	Aphidiini		Pauesia	Paraphidius	abietis				(Marshall, 1896)	<p style="margin-left: 40px;"><i>Aphidius abietis </i>Marshall, 1896</p>							England
40514	Animalia		Arthropoda			Insecta			Hymenoptera			Ichneumonoidea	Braconidae	Aphidiinae	Aphidiini		Pauesia	Paraphidius	cupressobii				(Starý, 1960)	<p style="margin-left: 40px;"><i>Paraphidius cupressobii </i>Starý, 1960</p>							Scotland		BMNH, det. Gärdenfors, added here
40515	Animalia		Arthropoda			Insecta			Hymenoptera			Ichneumonoidea	Braconidae	Aphidiinae	Aphidiini		Pauesia	Paraphidius	juniperorum				(Starý, 1960)	<p style="margin-left: 40px;"><i>Paraphidius juniperorum </i>Starý, 1960</p>							England, Scotland
40516	Animalia		Arthropoda			Insecta			Hymenoptera			Ichneumonoidea	Braconidae	Aphidiinae	Aphidiini		Pauesia	Paraphidius	pini				(Haliday, 1834)	<p style="margin-left: 40px;"><i>Aphidius pini </i>Haliday, 1834</p><p style="margin-left: 40px;"><i>planistipes </i>(Nees,1834, <i>Aphidius</i>)</p><p style="margin-left: 40px;"><i>varia </i>(Nees, 1834, <i>Aphidius</i>)</p><p style="margin-left: 40px;"><i>panzerii </i>(Rondani, 1848, <i>Aphidius</i>)</p><p style="margin-left: 40px;"><i>lachnivorus </i>(Ashmead, 1906, <i>Aphidius</i>)</p>							England, Scotland, Wales, Ireland
40517	Animalia		Arthropoda			Insecta			Hymenoptera			Ichneumonoidea	Braconidae	Aphidiinae	Aphidiini		Pauesia	Pauesia					Quilis Pérez, 1931
40518	Animalia		Arthropoda			Insecta			Hymenoptera			Ichneumonoidea	Braconidae	Aphidiinae	Aphidiini		Pauesia	Pauesia	infulata				(Haliday, 1834)	<p style="margin-left: 40px;"><i>Aphidius infulatus </i>Haliday, 1834</p><p style="margin-left: 40px;"><i>albiflagellaris </i>(Starý, 1960, <i>Paraphidius</i>)</p>							Scotland
40519	Animalia		Arthropoda			Insecta			Hymenoptera			Ichneumonoidea	Braconidae	Aphidiinae	Aphidiini		Pauesia	Pauesia	laricis				(Haliday, 1834)	<p style="margin-left: 40px;"><i>Aphidius laricis </i>Haliday, 1834</p>							Wales
40520	Animalia		Arthropoda			Insecta			Hymenoptera			Ichneumonoidea	Braconidae	Aphidiinae	Aphidiini		Pauesia	Pauesia	picta				(Haliday, 1834)	<p style="margin-left: 40px;"><i>Aphidius pictus </i>Haliday, 1834</p>							Wales
40521	Animalia		Arthropoda			Insecta			Hymenoptera			Ichneumonoidea	Braconidae	Aphidiinae	Aphidiini		Pauesia	Pauesia	unilachni				(Gahan, 1926)	<p style="margin-left: 40px;"><i>Aphidius unilachni </i>Gahan, 1926</p><p style="margin-left: 40px;"><i>albuferensis </i>Quilis, 1931</p><p style="margin-left: 40px;"><i>praevisus </i>(Gautier &amp; Bonnamour, 1936, <i>Aphidius</i>)</p><p style="margin-left: 40px;"><i>basilewskyi </i>(Benoit, 1955, <i>Trioxys</i>)</p>							England, Wales		added by Belshaw &amp; Quicke (1997)
40522	Animalia		Arthropoda			Insecta			Hymenoptera			Ichneumonoidea	Braconidae	Aphidiinae	Aphidiini		Trioxys						Haliday, 1833
40523	Animalia		Arthropoda			Insecta			Hymenoptera			Ichneumonoidea	Braconidae	Aphidiinae	Aphidiini		Trioxys	Pectoxys					Mackauer, 1960
40524	Animalia		Arthropoda			Insecta			Hymenoptera			Ichneumonoidea	Braconidae	Aphidiinae	Aphidiini		Trioxys	Pectoxys	macroceratus				Mackauer, 1960
40525	Animalia		Arthropoda			Insecta			Hymenoptera			Ichneumonoidea	Braconidae	Aphidiinae	Aphidiini		Trioxys	Trioxys					Haliday, 1833	<p style="margin-left: 40px;"><i>APHIDILEO </i>Rondani, 1877</p><p style="margin-left: 40px;"><i>NEVROPENES </i>Provancher, 1886</p><p style="margin-left: 40px;"><i>BIOXYS </i>Starý &amp; Schlinger, 1967</p>
40526	Animalia		Arthropoda			Insecta			Hymenoptera			Ichneumonoidea	Braconidae	Aphidiinae	Aphidiini		Trioxys	Trioxys	auctus				(Haliday, 1833)	<p style="margin-left: 40px;"><i>Aphidius auctus </i>Haliday, 1833</p><p style="margin-left: 40px;"><i>flaviceps </i>Szépligeti, 1898</p>							Ireland
40527	Animalia		Arthropoda			Insecta			Hymenoptera			Ichneumonoidea	Braconidae	Aphidiinae	Aphidiini		Trioxys	Trioxys	betulae				Marshall, 1896	<p style="margin-left: 40px;"><i>solani </i>Ivanov, 1925</p><p style="margin-left: 40px;"><i>hincksi </i>Mackauer, 1960</p>							England, Wales
40528	Animalia		Arthropoda			Insecta			Hymenoptera			Ichneumonoidea	Braconidae	Aphidiinae	Aphidiini		Trioxys	Trioxys	cirsii				(Curtis, 1831)	<p style="margin-left: 40px;"><i>Aphidius cirsii </i>Curtis, 1831</p><p style="margin-left: 40px;"><i>aceris </i>(Haliday, 1833, <i>Aphidius</i>)</p>							England, Wales, Ireland
40529	Animalia		Arthropoda			Insecta			Hymenoptera			Ichneumonoidea	Braconidae	Aphidiinae	Aphidiini		Trioxys	Trioxys	curvicaudus				Mackauer, 1967								England, Wales		added by Starý (1978)
40530	Animalia		Arthropoda			Insecta			Hymenoptera			Ichneumonoidea	Braconidae	Aphidiinae	Aphidiini		Trioxys	Trioxys	falcatus				Mackauer, 1959								Wales		added by Baker &amp; Broad (2009)
40531	Animalia		Arthropoda			Insecta			Hymenoptera			Ichneumonoidea	Braconidae	Aphidiinae	Aphidiini		Trioxys	Trioxys	ibis				Mackauer, 1961
40532	Animalia		Arthropoda			Insecta			Hymenoptera			Ichneumonoidea	Braconidae	Aphidiinae	Aphidiini		Trioxys	Trioxys	pallidus				(Haliday, 1833)	<p style="margin-left: 40px;"><i>Aphidius pallidus </i>Haliday, 1833</p><p style="margin-left: 40px;"><i>resolutus </i>(Nees, 1834, <i>Aphidius</i>)</p><p style="margin-left: 40px;"><i>callipteri </i>(Marshall, 1896, <i>Aphidius</i>)</p><p style="margin-left: 40px;"><i>pulcher </i>Gautier &amp; Bonnamour, 1924</p>							England, Wales
40533	Animalia		Arthropoda			Insecta			Hymenoptera			Ichneumonoidea	Braconidae	Aphidiinae	Aphidiini		Trioxys	Trioxys	tenuicaudus				Starý, 1978								Wales		added by Baker &amp; Broad (2013)
40534	Animalia		Arthropoda			Insecta			Hymenoptera			Ichneumonoidea	Braconidae	Aphidiinae	Ephedrini								Mackauer, 1961
40535	Animalia		Arthropoda			Insecta			Hymenoptera			Ichneumonoidea	Braconidae	Aphidiinae	Ephedrini		Ephedrus						Haliday, 1833										Synonymy and distribution data from Gärdenfors (1986).
40536	Animalia		Arthropoda			Insecta			Hymenoptera			Ichneumonoidea	Braconidae	Aphidiinae	Ephedrini		Ephedrus	Breviephedrus					Gärdenfors,1986
40537	Animalia		Arthropoda			Insecta			Hymenoptera			Ichneumonoidea	Braconidae	Aphidiinae	Ephedrini		Ephedrus	Breviephedrus	brevis				Stelfox, 1941	<p style="margin-left: 40px;"><i>picticornis </i>Stelfox, 1941</p><p style="margin-left: 40px;"><i>niger </i>Stelfox, 1941 nom. nud.</p>							England, Scotland, Ireland
40538	Animalia		Arthropoda			Insecta			Hymenoptera			Ichneumonoidea	Braconidae	Aphidiinae	Ephedrini		Ephedrus	Ephedrus					Haliday, 1833	<p style="margin-left: 40px;"><i>ELASSUS </i>Wesmael, 1835</p>
40539	Animalia		Arthropoda			Insecta			Hymenoptera			Ichneumonoidea	Braconidae	Aphidiinae	Ephedrini		Ephedrus	Ephedrus	cerasicola				Starý, 1962								England		added by Van Veen et al. (2008)
40540	Animalia		Arthropoda			Insecta			Hymenoptera			Ichneumonoidea	Braconidae	Aphidiinae	Ephedrini		Ephedrus	Ephedrus	helleni				Mackauer, 1968	<p style="margin-left: 40px;"><i>salicicola </i>Takada, 1968</p>							Scotland		added by Baker &amp; Broad (2013)
40541	Animalia		Arthropoda			Insecta			Hymenoptera			Ichneumonoidea	Braconidae	Aphidiinae	Ephedrini		Ephedrus	Ephedrus	lacertosus				(Haliday, 1833)	<p style="margin-left: 40px;"><i>Aphidius lacertosus </i>Haliday, 1833</p><p style="margin-left: 40px;"><i>muesebecki </i>Smith, 1944</p>							England, Scotland, Ireland
40542	Animalia		Arthropoda			Insecta			Hymenoptera			Ichneumonoidea	Braconidae	Aphidiinae	Ephedrini		Ephedrus	Ephedrus	laevicollis				(Thomson, 1895)	<p style="margin-left: 40px;"><i>Aphidius laevicollis </i>Thomson, 1895</p><p style="margin-left: 40px;"><i>brevicornis </i>(Nees, 1834, <i>Aphidius</i>) preocc.</p><p style="margin-left: 40px;"><i>minor </i>Stelfox, 1941</p><p style="margin-left: 40px;"><i>salicicola </i>Takada, 1968</p>							Wales, Ireland
40543	Animalia		Arthropoda			Insecta			Hymenoptera			Ichneumonoidea	Braconidae	Aphidiinae	Ephedrini		Ephedrus	Ephedrus	niger				Gautier, Bonnamour &amp; Gaumont, 1929	<p style="margin-left: 40px;"><i>?aphidivora </i>(Rondani, 1848, <i>Alysia</i>)</p><p style="margin-left: 40px;"><i>campestris </i>Starý, 1962</p>							England		added by Van Veen et al. (2008)
40544	Animalia		Arthropoda			Insecta			Hymenoptera			Ichneumonoidea	Braconidae	Aphidiinae	Ephedrini		Ephedrus	Ephedrus	persicae				Froggat, 1904	<p style="margin-left: 40px;"><i>nevadensis </i>Baker, 1909</p><p style="margin-left: 40px;"><i>nitidus </i>Gahan, 1917</p><p style="margin-left: 40px;"><i>vidali </i>Quilis, 1931</p><p style="margin-left: 40px;"><i>interstitialis </i>Watanabe, 1941</p><p style="margin-left: 40px;"><i>pulchellus </i>Stelfox, 1941</p><p style="margin-left: 40px;"><i>impressus </i>Granger, 1949</p><p style="margin-…							England, Ireland
40545	Animalia		Arthropoda			Insecta			Hymenoptera			Ichneumonoidea	Braconidae	Aphidiinae	Ephedrini		Ephedrus	Ephedrus	plagiator				(Nees, 1811)	<p style="margin-left: 40px;"><i>Bracon plagiator </i>Nees, 1811</p><p style="margin-left: 40px;"><i>parcicornis </i>(Nees, 1834, <i>Aphidius</i>)</p><p style="margin-left: 40px;"><i>japonicus </i>Ashmead, 1906</p><p style="margin-left: 40px;"><i>homostigma </i>Fahringer, 1934</p>							England, Scotland, Wales, Ireland
40546	Animalia		Arthropoda			Insecta			Hymenoptera			Ichneumonoidea	Braconidae	Aphidiinae	Ephedrini		Ephedrus	Lysephedrus					Starý, 1958
40547	Animalia		Arthropoda			Insecta			Hymenoptera			Ichneumonoidea	Braconidae	Aphidiinae	Ephedrini		Ephedrus	Lysephedrus	validus				(Haliday, 1833)	<p style="margin-left: 40px;"><i>Aphidius validus </i>Haliday, 1833</p>							England, Ireland
40548	Animalia		Arthropoda			Insecta			Hymenoptera			Ichneumonoidea	Braconidae	Aphidiinae	Ephedrini		Toxares						Haliday, 1840	<p style="margin-left: 40px;"><i>TRIONYX </i>Haliday, 1833 preocc.</p><p style="margin-left: 40px;"><i>TERONYX </i>Haldeman, 1842</p>
40549	Animalia		Arthropoda			Insecta			Hymenoptera			Ichneumonoidea	Braconidae	Aphidiinae	Ephedrini		Toxares		deltiger				(Haliday, 1833)	<p style="margin-left: 40px;"><i>Aphidius deltiger </i>Haliday, 1833</p><p style="margin-left: 40px;"><i>flaveolus </i>(Györfi, 1958, <i>Ephedrus</i>)</p>							England, Ireland
40550	Animalia		Arthropoda			Insecta			Hymenoptera			Ichneumonoidea	Braconidae	Aphidiinae	Praini								Mackauer, 1961
40551	Animalia		Arthropoda			Insecta			Hymenoptera			Ichneumonoidea	Braconidae	Aphidiinae	Praini		Areopraon						Mackauer, 1959	<p style="margin-left: 40px;"><i>MESOPRAON </i>Starý, 1981</p>
40552	Animalia		Arthropoda			Insecta			Hymenoptera			Ichneumonoidea	Braconidae	Aphidiinae	Praini		Areopraon		lepelleyi				(Waterston, 1926)	<p style="margin-left: 40px;"><i>Praon lepelleyi </i>Waterston, 1926</p>							England
40553	Animalia		Arthropoda			Insecta			Hymenoptera			Ichneumonoidea	Braconidae	Aphidiinae	Praini		Areopraon		silvestre				(Starý, 1971)	<p style="margin-left: 40px;"><i>Praon silvestre </i>Starý, 1971</p>							Wales		added by Baker &amp; Broad (2013); transferred to Areopraon by Tomanović et al. (2006).
40554	Animalia		Arthropoda			Insecta			Hymenoptera			Ichneumonoidea	Braconidae	Aphidiinae	Praini		Dyscritulus						Hincks, 1943	<p style="margin-left: 40px;"><i>DYSCRITUS </i>Marshall, 1896 preocc.</p>									Dyscritus suffolciensis Morley, 1933 is listed by default as a species of Dyscritulus in Taxapad (Yu et al., 2012) as although Starý (1959) recognised it as belonging to Euphorinae, its identity had not yet been established. Here it is synonymised under Syntretus splendidus (Marshall) q.v.
40555	Animalia		Arthropoda			Insecta			Hymenoptera			Ichneumonoidea	Braconidae	Aphidiinae	Praini		Dyscritulus		planiceps				(Marshall, 1896)	<p style="margin-left: 40px;"><i>Dyscritus planiceps </i>Marshall, 1896</p>							England, Wales
40556	Animalia		Arthropoda			Insecta			Hymenoptera			Ichneumonoidea	Braconidae	Aphidiinae	Praini		Dyscritulus		pygmaeus				Mackauer, 1961
40557	Animalia		Arthropoda			Insecta			Hymenoptera			Ichneumonoidea	Braconidae	Aphidiinae	Praini		Praon						Haliday, 1833	<p style="margin-left: 40px;"><i>ACHORISTUS </i>Ratzeburg, 1852</p><p style="margin-left: 40px;"><i>APHIDARIA </i>Provancher, 1886</p><p style="margin-left: 40px;"><i>PARAPRAON </i>Starý, 1983</p>									species of Praon excluded from the British and Irish list: [simulans (Provancher, 1886, Aphidaria) aguti Smith, 1944] A Nearctic species, listed by Kloet &amp; Hincks (1945) in error.
40558	Animalia		Arthropoda			Insecta			Hymenoptera			Ichneumonoidea	Braconidae	Aphidiinae	Praini		Praon		abjectum				(Haliday, 1833)	<p style="margin-left: 40px;"><i>Aphidius abjectum </i>Haliday, 1833</p><p style="margin-left: 40px;"><i>aphidiiforme </i>(Ratzeburg, 1852, <i>Bracon</i>)</p><p style="margin-left: 40px;"><i>peregrinum </i>Ruthe, 1859</p>							England, Ireland
40559	Animalia		Arthropoda			Insecta			Hymenoptera			Ichneumonoidea	Braconidae	Aphidiinae	Praini		Praon		absinthii				Bignell, 1894										Erroneously listed in Taxapad as a junior synonym of flavinode; see, for example, Kavallieratos et al. (2005).
40560	Animalia		Arthropoda			Insecta			Hymenoptera			Ichneumonoidea	Braconidae	Aphidiinae	Praini		Praon		barbatum				Mackauer, 1967								England		BMNH, det. Torrance &amp; Broad, added here
40561	Animalia		Arthropoda			Insecta			Hymenoptera			Ichneumonoidea	Braconidae	Aphidiinae	Praini		Praon		bicolor				Mackauer, 1959								Wales		added by Baker &amp; Broad (2009)
40562	Animalia		Arthropoda			Insecta			Hymenoptera			Ichneumonoidea	Braconidae	Aphidiinae	Praini		Praon		cavariellae				Starý, 1971								Scotland, Wales		added by Baker &amp; Broad (2013)
40563	Animalia		Arthropoda			Insecta			Hymenoptera			Ichneumonoidea	Braconidae	Aphidiinae	Praini		Praon		dorsale				(Haliday, 1833)	<p style="margin-left: 40px;"><i>Aphidius dorsale </i>Haliday, 1833</p><i>discolor </i>(Nees, 1834, <i>Blacus</i>)</p><p style="margin-left: 40px;"><i>collare </i>Förster, 1867 nom. nud.</p>							England, Wales, Ireland
40564	Animalia		Arthropoda			Insecta			Hymenoptera			Ichneumonoidea	Braconidae	Aphidiinae	Praini		Praon		exsoletum				(Nees, 1811)	<p style="margin-left: 40px;"><i>Bracon exsoletum </i>Nees, 1811</p><p style="margin-left: 40px;"><i>palitans </i>Muesebeck, 1956</p>
40565	Animalia		Arthropoda			Insecta			Hymenoptera			Ichneumonoidea	Braconidae	Aphidiinae	Praini		Praon		flavinode				(Haliday, 1833)	<p style="margin-left: 40px;"><i>Aphidius flavinode </i>Haliday, 1833</p><p style="margin-left: 40px;"><i>emacerator </i>(Nees, 1834, <i>Blacus</i>)</p><p style="margin-left: 40px;"><i>glabrum </i>Starý &amp; Schlinger, 1967</p>							England, Wales
40566	Animalia		Arthropoda			Insecta			Hymenoptera			Ichneumonoidea	Braconidae	Aphidiinae	Praini		Praon		gallicum				Starý, 1971								England		added by Traugott et al. (2008)
40567	Animalia		Arthropoda			Insecta			Hymenoptera			Ichneumonoidea	Braconidae	Aphidiinae	Praini		Praon		longicorne				(Marshall, 1896)	<p style="margin-left: 40px;"><i>Aphidius longicorne </i>Marshall, 1896</p><p style="margin-left: 40px;"><i>grossum </i>Starý, 1971</p>							Wales
40568	Animalia		Arthropoda			Insecta			Hymenoptera			Ichneumonoidea	Braconidae	Aphidiinae	Praini		Praon		necans				Mackauer, 1959	<p style="margin-left: 40px;"><i>nympheae </i>Subba Rao, Sarup &amp; Sharma, 1963</p>							Wales		added by Baker &amp; Broad (2013)
40569	Animalia		Arthropoda			Insecta			Hymenoptera			Ichneumonoidea	Braconidae	Aphidiinae	Praini		Praon		spinosum				Mackauer, 1959								Wales		added by Baker &amp; Broad (2009)
40570	Animalia		Arthropoda			Insecta			Hymenoptera			Ichneumonoidea	Braconidae	Aphidiinae	Praini		Praon		volucre				(Haliday, 1833)	<p style="margin-left: 40px;"><i>Aphidius volucre </i>Haliday, 1833</p><p style="margin-left: 40px;"><i>angulator </i>(Nees, 1834, <i>Blacus</i>)</p><p style="margin-left: 40px;"><i>aphidivorum </i>(Ratzeburg, 1844, <i>Aphidius</i>)</p><p style="margin-left: 40px;"><i>pruni </i>Ivanov, 1925</p><p style="margin-left: 40px;"><i>breve </i>Fahringer, 1935</p><p style="margin-left: 40px;"><i>mongolicu…							England, Wales, Ireland
40571	Animalia		Arthropoda			Insecta			Hymenoptera			Ichneumonoidea	Braconidae	Aphidiinae	Praini		Praon		yomenae				Takada, 1968								Wales		added by Baker &amp; Broad (2013)
40572	Animalia		Arthropoda			Insecta			Hymenoptera			Ichneumonoidea	Braconidae	Brachistinae									Förster, 1863	<p style="margin-left: 40px;"><i>CALYPTINAE </i>Marshall, 1872</p>									Following Belshaw & Quicke (2002), van Achterberg (2003c) and Belokobylskij et al. (2003) we treat the Brachistinae as a subfamily separate from Helconinae. Sharanowski et al. (2011) expanded the limits of the Brachistinae by including the tribe Diospilini and the former subfamily Blacinae (as well as the extralimital Brulleiini). The tribes employed here are those that have been used in previous…
40573	Animalia		Arthropoda			Insecta			Hymenoptera			Ichneumonoidea	Braconidae	Brachistinae	Blacini								Förster, 1863										Generally considered to be a distinct subfamily, but Sharanowski et al. (2011) found that the blacines nested within the Brachistinae in their molecular phylogenetic analyses. We think it likely that these results will be upheld with further phylogenetic work and follow Sharanowski et al.’s (2011) recommended changes to the subfamily classification. Distribution and taxonomic data from van Achter…
40574	Animalia		Arthropoda			Insecta			Hymenoptera			Ichneumonoidea	Braconidae	Brachistinae	Blacini		Blacometeorus						Tobias, 1976
40575	Animalia		Arthropoda			Insecta			Hymenoptera			Ichneumonoidea	Braconidae	Brachistinae	Blacini		Blacometeorus		brevicauda				(Hellén, 1958)	<p style="margin-left: 40px;"><i>Diospilus brevicauda </i>Hellén, 1958</p>							England		added by van Achterberg (1988a); Shaw (1996b)
40576	Animalia		Arthropoda			Insecta			Hymenoptera			Ichneumonoidea	Braconidae	Brachistinae	Blacini		Blacometeorus		pusillus				(Hellén, 1958)	<p style="margin-left: 40px;"><i>Diospilus pusillus </i>Hellén, 1958</p>							England		added by Shaw (1996b)
40577	Animalia		Arthropoda			Insecta			Hymenoptera			Ichneumonoidea	Braconidae	Brachistinae	Blacini		Blacus						Nees, 1818
40578	Animalia		Arthropoda			Insecta			Hymenoptera			Ichneumonoidea	Braconidae	Brachistinae	Blacini		Blacus	Blacus					Nees, 1818	<p style="margin-left: 40px;"><i>GONIOCORMUS </i>Förster, 1863</p><p style="margin-left: 40px;"><i>MIOCOLUS </i>Förster, 1863</p>
40579	Animalia		Arthropoda			Insecta			Hymenoptera			Ichneumonoidea	Braconidae	Brachistinae	Blacini		Blacus	Blacus	errans				(Nees, 1811)	<p style="margin-left: 40px;"><i>Bracon errans </i>Nees, 1811</p><p style="margin-left: 40px;"><i>vagans </i>Ruthe, 1861</p>							England
40580	Animalia		Arthropoda			Insecta			Hymenoptera			Ichneumonoidea	Braconidae	Brachistinae	Blacini		Blacus	Blacus	exilis				(Nees, 1811)	<p style="margin-left: 40px;"><i>Bracon exilis </i>Nees, 1811</p><p style="margin-left: 40px;"><i>lactucaphis </i>(Fitch, 1855, <i>Aphidius</i>)</p><p style="margin-left: 40px;"><i>pallipes </i>(Förster, 1863, <i>Miocolus</i>)</p><p style="margin-left: 40px;"><i>pallidipes </i>(Dalla Torre, 1898, <i>Miocolus</i>)</p><p style="margin-left: 40px;"><i>nanus </i>Ashmead, 1905 nom. nud.</p><p style="m…							England, Ireland
40581	Animalia		Arthropoda			Insecta			Hymenoptera			Ichneumonoidea	Braconidae	Brachistinae	Blacini		Blacus	Blacus	filicornis				Haeselbarth, 1973								England, Ireland
40582	Animalia		Arthropoda			Insecta			Hymenoptera			Ichneumonoidea	Braconidae	Brachistinae	Blacini		Blacus	Blacus	forticornis				Haeselbarth, 1973								England
40583	Animalia		Arthropoda			Insecta			Hymenoptera			Ichneumonoidea	Braconidae	Brachistinae	Blacini		Blacus	Blacus	hastatus				Haliday, 1835	<p style="margin-left: 40px;"><i>terebrator </i>Ruthe, 1861</p>							England, Scotland, Ireland
40584	Animalia		Arthropoda			Insecta			Hymenoptera			Ichneumonoidea	Braconidae	Brachistinae	Blacini		Blacus	Blacus	humilis				(Nees, 1811)	<p style="margin-left: 40px;"><i>Bracon humilis </i>Nees, 1811</p><p style="margin-left: 40px;"><i>trivialis </i>Haliday, 1835</p><p style="margin-left: 40px;"><i>wesmaeli </i>Ruthe, 1861</p>							England, Wales, Ireland
40585	Animalia		Arthropoda			Insecta			Hymenoptera			Ichneumonoidea	Braconidae	Brachistinae	Blacini		Blacus	Blacus	instabilis				Ruthe, 1861	<p style="margin-left: 40px;"><i>petiolatus </i>Haeselbarth, 1973 nom. nud.</p>							England, Scotland, Ireland
40586	Animalia		Arthropoda			Insecta			Hymenoptera			Ichneumonoidea	Braconidae	Brachistinae	Blacini		Blacus	Blacus	leptostigma				Ruthe, 1861								Ireland
40587	Animalia		Arthropoda			Insecta			Hymenoptera			Ichneumonoidea	Braconidae	Brachistinae	Blacini		Blacus	Blacus	longipennis				(Gravenhorst, 1809)	<p style="margin-left: 40px;"><i>Ophion longipenne </i>Gravenhorst, 1809</p><p style="margin-left: 40px;"><i>dubius </i>Ruthe, 1861</p>							England, Scotland, Ireland
40588	Animalia		Arthropoda			Insecta			Hymenoptera			Ichneumonoidea	Braconidae	Brachistinae	Blacini		Blacus	Blacus	nigricornis				Haeselbarth, 1973								England, Scotland, Ireland
40589	Animalia		Arthropoda			Insecta			Hymenoptera			Ichneumonoidea	Braconidae	Brachistinae	Blacini		Blacus	Blacus	paganus				Haliday, 1835	<p style="margin-left: 40px;"><i>brevicornis </i>Ruthe, 1861</p>							Ireland
40590	Animalia		Arthropoda			Insecta			Hymenoptera			Ichneumonoidea	Braconidae	Brachistinae	Blacini		Blacus	Blacus	stelfoxi				Haeselbarth, 1973								England		The holotype was collected in Sandhurst, Kent (Haeselbarth, 1973) but not listed for Britain or Ireland by van Achterberg (1988a).
40591	Animalia		Arthropoda			Insecta			Hymenoptera			Ichneumonoidea	Braconidae	Brachistinae	Blacini		Blacus	Ganychorus					Haliday, 1835
40592	Animalia		Arthropoda			Insecta			Hymenoptera			Ichneumonoidea	Braconidae	Brachistinae	Blacini		Blacus	Ganychorus	ambulans				Haliday, 1835								Ireland
40593	Animalia		Arthropoda			Insecta			Hymenoptera			Ichneumonoidea	Braconidae	Brachistinae	Blacini		Blacus	Ganychorus	armatulus				Ruthe, 1861								England
40594	Animalia		Arthropoda			Insecta			Hymenoptera			Ichneumonoidea	Braconidae	Brachistinae	Blacini		Blacus	Ganychorus	diversicornis				Nees, 1834	<p style="margin-left: 40px;"><i>compar </i>Ruthe, 1861</p>							England, Ireland
40595	Animalia		Arthropoda			Insecta			Hymenoptera			Ichneumonoidea	Braconidae	Brachistinae	Blacini		Blacus	Ganychorus	macropterus				Haeselbarth, 1973								England, Scotland		Described as a subspecies of ambulans by Haeselbarth (1973), but not included by Huddleston (1978), where it should have been listed as a synonym. Treated as a separate species by van Achterberg (1997).
40596	Animalia		Arthropoda			Insecta			Hymenoptera			Ichneumonoidea	Braconidae	Brachistinae	Blacini		Blacus	Ganychorus	maculipes				Wesmael, 1835								England, Scotland, Ireland
40597	Animalia		Arthropoda			Insecta			Hymenoptera			Ichneumonoidea	Braconidae	Brachistinae	Blacini		Blacus	Ganychorus	nitidus				Haeselbarth, 1973	<p style="margin-left: 40px;"><i>petiolatus </i>Tobias, 1976</p>							England
40598	Animalia		Arthropoda			Insecta			Hymenoptera			Ichneumonoidea	Braconidae	Brachistinae	Blacini		Blacus	Ganychorus	pallipes				Haliday, 1835	<p style="margin-left: 40px;"><i>barynoti </i>misident.</p><p style="margin-left: 40px;"><i>tuberculatus </i>Wesmael, 1835</p><p style="margin-left: 40px;"><i>florus </i>Goureau, 1851</p>							England, Ireland		Included, as barynoti (Boudier, 1834) (a junior synonym of Pygostolus sticticus), as a doubtfully placed species by Huddleston (1978).
40599	Animalia		Arthropoda			Insecta			Hymenoptera			Ichneumonoidea	Braconidae	Brachistinae	Blacini		Blacus	Ganychorus	ruficornis				(Nees, 1811)	<p style="margin-left: 40px;"><i>Bracon ruficornis </i>Nees, 1811</p><p style="margin-left: 40px;"><i>bisstigmatus </i>(Say, 1836, <i>Microgaster</i>)</p><p style="margin-left: 40px;"><i>tipulator </i>(Zetterstedt, 1838, <i>Bracon</i>)</p><p style="margin-left: 40px;"><i>cerealis </i>(Curtis, 1860, <i>Dacnusa</i>)</p><p style="margin-left: 40px;"><i>pallidipes </i>(Costa, 1885, <i>Dinocampus</i>)…							England, Scotland, Wales, Ireland
40600	Animalia		Arthropoda			Insecta			Hymenoptera			Ichneumonoidea	Braconidae	Brachistinae	Blacini		Blacus	Ganychorus	strictus				Stelfox, 1941	<p style="margin-left: 40px;"><i>strictus </i>(Curtis, 1837, <i>Ganychorus</i>) nom. nud.</p>							Scotland, Ireland
40601	Animalia		Arthropoda			Insecta			Hymenoptera			Ichneumonoidea	Braconidae	Brachistinae	Blacini		Blacus	Ganychorus	tripudians				Haliday, 1835								England, Ireland
40602	Animalia		Arthropoda			Insecta			Hymenoptera			Ichneumonoidea	Braconidae	Brachistinae	Blacini		Blacus	Hysterobolus					Viereck, 1913
40603	Animalia		Arthropoda			Insecta			Hymenoptera			Ichneumonoidea	Braconidae	Brachistinae	Blacini		Blacus	Hysterobolus	mamillanus				Ruthe, 1861	<p style="margin-left: 40px;"><i>aptenodytes </i>Marshall, 1889</p>							England
40604	Animalia		Arthropoda			Insecta			Hymenoptera			Ichneumonoidea	Braconidae	Brachistinae	Brachistini								Förster, 1863
40605	Animalia		Arthropoda			Insecta			Hymenoptera			Ichneumonoidea	Braconidae	Brachistinae	Brachistini		Eubazus						Nees, 1814
40606	Animalia		Arthropoda			Insecta			Hymenoptera			Ichneumonoidea	Braconidae	Brachistinae	Brachistini		Eubazus	Aliolus					Say, 1836
40607	Animalia		Arthropoda			Insecta			Hymenoptera			Ichneumonoidea	Braconidae	Brachistinae	Brachistini		Eubazus	Aliolus	lepidus				(Haliday, 1835)	<p style="margin-left: 40px;"><i>Helcon lepidus </i>Haliday, 1835</p><p style="margin-left: 40px;"><i>hofferi </i>(Šnoflák, 1953, <i>Triaspis</i>)</p><p style="margin-left: 40px;"><i>kusarensis </i>(Abdinbekova, 1969, <i>Allodorus</i>)</p>							England
40608	Animalia		Arthropoda			Insecta			Hymenoptera			Ichneumonoidea	Braconidae	Brachistinae	Brachistini		Eubazus	Allodorus					Förster, 1863
40609	Animalia		Arthropoda			Insecta			Hymenoptera			Ichneumonoidea	Braconidae	Brachistinae	Brachistini		Eubazus	Allodorus	convexope				van Achterberg, 2000								Scotland		added by van Achterberg (2000)
40610	Animalia		Arthropoda			Insecta			Hymenoptera			Ichneumonoidea	Braconidae	Brachistinae	Brachistini		Eubazus	Allodorus	semirugosus				(Nees, 1816)	<p style="margin-left: 40px;"><i>Sigalphus semirugosus </i>Nees, 1816</p><p style="margin-left: 40px;"><i>rufipes </i>(Herrich-Schäffer, 1838, <i>Eubadizon</i>)</p><p style="margin-left: 40px;"><i>tuberculator </i>(Zetterstedt, 1838, <i>Bracon</i>)</p><p style="margin-left: 40px;"><i>curculionum </i>(Hartig, 1847, <i>Sigalphus</i>)</p><p style="margin-left: 40px;"><i>atricornis </i>(Ratzeburg, 18…							England, Scotland
40611	Animalia		Arthropoda			Insecta			Hymenoptera			Ichneumonoidea	Braconidae	Brachistinae	Brachistini		Eubazus	Allodorus	tricoloripes				van Achterberg, 2000								England		added by van Achterberg (2000)
40612	Animalia		Arthropoda			Insecta			Hymenoptera			Ichneumonoidea	Braconidae	Brachistinae	Brachistini		Eubazus	Brachistes					Wesmael, 1835
40613	Animalia		Arthropoda			Insecta			Hymenoptera			Ichneumonoidea	Braconidae	Brachistinae	Brachistini		Eubazus	Brachistes	fasciatus				(Nees, 1816)	<p style="margin-left: 40px;"><i>Sigalphus fasciatus </i>Nees, 1816</p><p style="margin-left: 40px;"><i>fuscipalpis </i>(Wesmael, 1835, <i>Brachistes</i>)</p>							England, Ireland
40614	Animalia		Arthropoda			Insecta			Hymenoptera			Ichneumonoidea	Braconidae	Brachistinae	Brachistini		Eubazus	Brachistes	minutus				(Ratzeburg, 1848)	<p style="margin-left: 40px;"><i>Brachistes minutus </i>Ratzeburg, 1848</p>							England
40615	Animalia		Arthropoda			Insecta			Hymenoptera			Ichneumonoidea	Braconidae	Brachistinae	Brachistini		Eubazus	Brachistes	ruficoxis				(Wesmael, 1835)	<p style="margin-left: 40px;"><i>Brachistes ruficoxis </i>Wesmael, 1835</p><p style="margin-left: 40px;"><i>politus </i>(Ratzeburg, 1852, <i>Brachistes</i>)</p><p style="margin-left: 40px;"><i>byctisci </i>(Watanabe, 1933, <i>Calyptus</i>)</p><p style="margin-left: 40px;"><i>ruficornis </i>misspelling</p>							England
40616	Animalia		Arthropoda			Insecta			Hymenoptera			Ichneumonoidea	Braconidae	Brachistinae	Brachistini		Eubazus	Brachistes	segmentatus				(Marshall, 1889)	<p style="margin-left: 40px;"><i>Calyptus segmentatus </i>Marshall, 1889</p>							England
40617	Animalia		Arthropoda			Insecta			Hymenoptera			Ichneumonoidea	Braconidae	Brachistinae	Brachistini		Eubazus	Brachistes	semicastaneus				(Marshall, 1893)	<p style="margin-left: 40px;"><i>Calyptus semicastaneus </i>Marshall, 1893</p>							England
40618	Animalia		Arthropoda			Insecta			Hymenoptera			Ichneumonoidea	Braconidae	Brachistinae	Brachistini		Eubazus	Brachistes	tibialis				(Haliday, 1835)	<p style="margin-left: 40px;"><i>Helcon tibialis </i>Haliday, 1835</p><p style="margin-left: 40px;"><i>uncigenus </i>(Wesmael, 1835, <i>Brachistes</i>)</p>							England, Scotland, Ireland
40619	Animalia		Arthropoda			Insecta			Hymenoptera			Ichneumonoidea	Braconidae	Brachistinae	Brachistini		Eubazus	Calyptus					Haliday, 1835
40620	Animalia		Arthropoda			Insecta			Hymenoptera			Ichneumonoidea	Braconidae	Brachistinae	Brachistini		Eubazus	Calyptus	macrocephalus				Nees, 1812	<p style="margin-left: 40px;"><i>synchitae </i>(Hedqvist, 1956, <i>Eubadizon</i>)</p><p style="margin-left: 40px;"><i>ratzeburgi </i>(Fischer, 1962, <i>Eubadizon</i>)</p><p style="margin-left: 40px;"><i>xiphydriae </i>Tobias, 1986</p>							England
40621	Animalia		Arthropoda			Insecta			Hymenoptera			Ichneumonoidea	Braconidae	Brachistinae	Brachistini		Eubazus	Calyptus	sigalphoides				(Marshall, 1889)	<p style="margin-left: 40px;"><i>Calyptus sigalphoides </i>Marshall, 1889</p>							England
40622	Animalia		Arthropoda			Insecta			Hymenoptera			Ichneumonoidea	Braconidae	Brachistinae	Brachistini		Eubazus	Eubazus					Nees, 1814	<p style="margin-left: 40px;"><i>Eubadizon </i>Nees, 1834</p><p style="margin-left: 40px;"><i>Eubadizus </i>Nees, 1834</p>
40623	Animalia		Arthropoda			Insecta			Hymenoptera			Ichneumonoidea	Braconidae	Brachistinae	Brachistini		Eubazus	Eubazus	flavipes				(Haliday, 1835)	<p style="margin-left: 40px;"><i>Helcon flavipes </i>Haliday, 1835</p><p style="margin-left: 40px;"><i>laevis </i>(Herrich-Schäffer, 1838, <i>Eubadizon</i>)</p>							England, Ireland
40624	Animalia		Arthropoda			Insecta			Hymenoptera			Ichneumonoidea	Braconidae	Brachistinae	Brachistini		Eubazus	Eubazus	longicauda				(Curtis, 1832)	<p style="margin-left: 40px;"><i>Zele longicauda </i>Curtis, 1832</p>							England		Listed as a species of Zele (=Homolobus) in Huddleston (1978). Will be synonymised under another species of Eubazus (van Achterberg, pers. comm.).
40625	Animalia		Arthropoda			Insecta			Hymenoptera			Ichneumonoidea	Braconidae	Brachistinae	Brachistini		Eubazus	Eubazus	pallipes				Nees, 1814	<p style="margin-left: 40px;"><i>coxalis </i>(Nees, 1834, <i>Eubadizon</i>)</p><p style="margin-left: 40px;"><i>semistriatus </i>(Haliday, 1835, <i>Helcon</i>) unavailable</p><p style="margin-left: 40px;"><i>americanus </i>(Cresson, 1872, <i>Eubadizon</i>)</p><p style="margin-left: 40px;"><i>pallipede </i>misspelling</p><p style="margin-left: 40px;"><i>pallidipes </i>misspelling</p><p style="marg…							England
40626	Animalia		Arthropoda			Insecta			Hymenoptera			Ichneumonoidea	Braconidae	Brachistinae	Brachistini		Foersteria						Szépligeti, 1896
40627	Animalia		Arthropoda			Insecta			Hymenoptera			Ichneumonoidea	Braconidae	Brachistinae	Brachistini		Foersteria	Foersteria	laeviuscula				Szépligeti, 1896								England, Scotland		NMS, det. van Achterberg, added here
40628	Animalia		Arthropoda			Insecta			Hymenoptera			Ichneumonoidea	Braconidae	Brachistinae	Brachistini		Foersteria	Foersteria	puber				(Haliday, 1835)	<p style="margin-left: 40px;"><i>Helcon puber </i>Haliday, 1835</p><p style="margin-left: 40px;"><i>opaca </i>(Reinhard, 1867, <i>Calyptus</i>)</p><p style="margin-left: 40px;"><i>flavipes </i>Szépligeti, 1896</p><p style="margin-left: 40px;"><i>talitzkii </i>Tobias, 1961</p>							England, Ireland
40629	Animalia		Arthropoda			Insecta			Hymenoptera			Ichneumonoidea	Braconidae	Brachistinae	Brachistini		Schizoprymnus						Förster, 1863										species of Schizoprymnus excluded from the British and Irish list: [nigripes (Thomson, 1892, Sigalphus)] Seems to have been recorded in error by Kloet &amp; Hincks (1945), perpetuated by Huddleston (1978).
40630	Animalia		Arthropoda			Insecta			Hymenoptera			Ichneumonoidea	Braconidae	Brachistinae	Brachistini		Schizoprymnus		ambiguus				(Nees, 1816)	<p style="margin-left: 40px;"><i>Sigalphus ambiguus </i>Nees, 1816</p>							England, Ireland
40631	Animalia		Arthropoda			Insecta			Hymenoptera			Ichneumonoidea	Braconidae	Brachistinae	Brachistini		Schizoprymnus		collaris				(Thomson, 1874)	<p style="margin-left: 40px;"><i>Sigalphus collaris </i>Thomson, 1874</p>							England		added by Notton et al. (2014); listed as a species of Triaspis by Yu et al. (2012) but transferred back to Schizoprymnus by Notton et al. (2014)
40632	Animalia		Arthropoda			Insecta			Hymenoptera			Ichneumonoidea	Braconidae	Brachistinae	Brachistini		Schizoprymnus		obscurus				(Nees, 1816)	<p style="margin-left: 40px;"><i>Sigalphus obscurus </i>Nees, 1816</p>							England
40633	Animalia		Arthropoda			Insecta			Hymenoptera			Ichneumonoidea	Braconidae	Brachistinae	Brachistini		Triaspis						Haliday, 1838	<p style="margin-left: 40px;"><i>MUIRIELLA </i>Fullaway, 1919</p>									species of Triaspis excluded from the British and Irish list [striola (Thomson, 1874, Sigalphus) ] Listed as a doubtfully British species in Huddleston (1978); the only record is of a tentative identification by Nixon (Hussey, 1952).
40634	Animalia		Arthropoda			Insecta			Hymenoptera			Ichneumonoidea	Braconidae	Brachistinae	Brachistini		Triaspis		aciculata				(Ratzeburg, 1848)	<p style="margin-left: 40px;"><i>Sigalphus aciculatus </i>Ratzeburg, 1848</p>							England		BMNH, NMS, det. van Achterberg, added here; although synonymised with obscurella by van Achterberg (in Belokobylskij et al., 2003) this is listed as a separate species in Fauna Europaea. There are English specimens identified by van Achterberg as aciculata in NMS and BMNH.
40635	Animalia		Arthropoda			Insecta			Hymenoptera			Ichneumonoidea	Braconidae	Brachistinae	Brachistini		Triaspis		caledonica				(Marshall, 1888)	<p style="margin-left: 40px;"><i>Sigalphus caledonicus </i>Marshall, 1888</p>							Scotland
40636	Animalia		Arthropoda			Insecta			Hymenoptera			Ichneumonoidea	Braconidae	Brachistinae	Brachistini		Triaspis		caudata				(Nees, 1816)	<p style="margin-left: 40px;"><i>Sigalphus caudatus </i>Nees, 1816</p><p style="margin-left: 40px;"><i>gracilis </i>(Herrich-Schäffer, 1840, <i>Sigalphus</i>)</p><p style="margin-left: 40px;"><i>australis </i>(Szépligeti, 1901, <i>Sigalphus</i>)</p><p style="margin-left: 40px;"><i>arctica </i>Hellén, 1958</p>							England, Ireland
40637	Animalia		Arthropoda			Insecta			Hymenoptera			Ichneumonoidea	Braconidae	Brachistinae	Brachistini		Triaspis		flavipalpis				(Wesmael, 1835)	<p style="margin-left: 40px;"><i>Sigalphus flavipalpis </i>Wesmael, 1835</p>							England
40638	Animalia		Arthropoda			Insecta			Hymenoptera			Ichneumonoidea	Braconidae	Brachistinae	Brachistini		Triaspis		floricola				(Wesmael, 1835)	<p style="margin-left: 40px;"><i>Sigalphus floricola </i>Wesmael, 1835</p><p style="margin-left: 40px;"><i>minima </i>Snoflák, 1953</p>							England, Ireland
40639	Animalia		Arthropoda			Insecta			Hymenoptera			Ichneumonoidea	Braconidae	Brachistinae	Brachistini		Triaspis		luteipes				(Thomson, 1874)	<p style="margin-left: 40px;"><i>Sigalphus luteipes </i>Thomson, 1874</p>							England
40640	Animalia		Arthropoda			Insecta			Hymenoptera			Ichneumonoidea	Braconidae	Brachistinae	Brachistini		Triaspis		obscurella				(Nees, 1816)	<p style="margin-left: 40px;"><i>Sigalphus obscurellus </i>Nees, 1816</p><p style="margin-left: 40px;"><i>simulator </i>(Szépligeti, 1901, <i>Sigalphus</i>)</p>							England
40641	Animalia		Arthropoda			Insecta			Hymenoptera			Ichneumonoidea	Braconidae	Brachistinae	Brachistini		Triaspis		pallipes				(Nees, 1816)	<p style="margin-left: 40px;"><i>Sigalphus pallipes </i>Nees, 1816</p><p style="margin-left: 40px;"><i>fulvipes </i>(Haliday, 1835, <i>Helcon</i>)</p><p style="margin-left: 40px;"><i>fagi </i>(Ratzeburg, 1852, <i>Brachistes</i>)</p><p style="margin-left: 40px;"><i>similis </i>(Szépligeti, 1901, <i>Sigalphus</i>) preocc.</p><p style="margin-left: 40px;"><i>pallidipes </i>misspelling</p>							England, Ireland, Isle of Man		some distribution data from Shaw &amp; Askew (1976)
40642	Animalia		Arthropoda			Insecta			Hymenoptera			Ichneumonoidea	Braconidae	Brachistinae	Brachistini		Triaspis		podlussanyi				Papp, 1998								England		added by Shaw &amp; Mendel (in prep.)
40643	Animalia		Arthropoda			Insecta			Hymenoptera			Ichneumonoidea	Braconidae	Brachistinae	Brachistini		Triaspis		striatula				(Nees, 1816)	<p style="margin-left: 40px;"><i>Sigalphus striatulus </i>Nees, 1816</p>							England, Ireland
40644	Animalia		Arthropoda			Insecta			Hymenoptera			Ichneumonoidea	Braconidae	Brachistinae	Brachistini		Triaspis		thoracica				(Curtis, 1860)	<p style="margin-left: 40px;"><i>Sigalphus thoracicus </i>Curtis, 1860</p><p style="margin-left: 40px;"><i>gibberosa </i>(Szépligeti, 1901, <i>Sigalphus</i>)</p><p style="margin-left: 40px;"><i>rugosa </i>(Szépligeti, 1901, <i>Sigalphus</i>)</p>							England
40645	Animalia		Arthropoda			Insecta			Hymenoptera			Ichneumonoidea	Braconidae	Brachistinae	Diospilini								Förster, 1863
40646	Animalia		Arthropoda			Insecta			Hymenoptera			Ichneumonoidea	Braconidae	Brachistinae	Diospilini		Aspicolpus						Wesmael, 1838	<p style="margin-left: 40px;"><i>ASPIDOCOLPUS </i>Agassiz, 1846</p>
40647	Animalia		Arthropoda			Insecta			Hymenoptera			Ichneumonoidea	Braconidae	Brachistinae	Diospilini		Aspicolpus		?clipealis				(Tobias, 1967)	<p style="margin-left: 40px;"><i>Aspidocolpus clipealis </i>Tobias, 1967</p>							England		NMS, det. van Achterberg, added here; tentative identification; included here as a certain generic record of an Aspicolpus species in Britain.
40648	Animalia		Arthropoda			Insecta			Hymenoptera			Ichneumonoidea	Braconidae	Brachistinae	Diospilini		Aspigonus						Wesmael, 1835	<p style="margin-left: 40px;"><i>ASPIDOGONUS </i>Agassiz, 1846</p>
40649	Animalia		Arthropoda			Insecta			Hymenoptera			Ichneumonoidea	Braconidae	Brachistinae	Diospilini		Aspigonus		flavicornis				(Nees, 1834)	<p style="margin-left: 40px;"><i>Bracon flavicornis </i>Nees, 1834</p><p style="margin-left: 40px;"><i>diversicornis </i>Wesmael, 1835</p>							England, Wales
40650	Animalia		Arthropoda			Insecta			Hymenoptera			Ichneumonoidea	Braconidae	Brachistinae	Diospilini		Diospilus						Haliday, 1833	<p style="margin-left: 40px;"><i>BAEACIS </i>Förster, 1878</p><p style="margin-left: 40px;"><i>ALLOCHROMUS </i>Marshall, 1902</p>
40651	Animalia		Arthropoda			Insecta			Hymenoptera			Ichneumonoidea	Braconidae	Brachistinae	Diospilini		Diospilus		abietis				(Ratzeburg, 1844)	<p style="margin-left: 40px;"><i>Aspigonus abietis </i>Ratzeburg, 1844</p>
40652	Animalia		Arthropoda			Insecta			Hymenoptera			Ichneumonoidea	Braconidae	Brachistinae	Diospilini		Diospilus		capito				(Nees, 1834)	<p style="margin-left: 40px;"><i>Bracon capito </i>Nees, 1834</p><p style="margin-left: 40px;"><i>filator </i>(Nees, 1834, <i>Bracon</i>) preocc.</p><p style="margin-left: 40px;"><i>fuscipes </i>(Wesmael, 1835, <i>Taphaeus</i>)</p>							England, Ireland
40653	Animalia		Arthropoda			Insecta			Hymenoptera			Ichneumonoidea	Braconidae	Brachistinae	Diospilini		Diospilus		dispar				(Nees, 1811)	<p style="margin-left: 40px;"><i>Bracon dispar </i>Nees, 1811</p><p style="margin-left: 40px;"><i>ephippium </i>(Nees, 1834, <i>Bracon</i>)</p>							England
40654	Animalia		Arthropoda			Insecta			Hymenoptera			Ichneumonoidea	Braconidae	Brachistinae	Diospilini		Diospilus		inflexus				Reinhard, 1862	<p style="margin-left: 40px;"><i>ovatus </i>Marshall, 1889</p>							England
40655	Animalia		Arthropoda			Insecta			Hymenoptera			Ichneumonoidea	Braconidae	Brachistinae	Diospilini		Diospilus		intermedius				(Förster, 1878)	<p style="margin-left: 40px;"><i>Baeacis intermedia </i>Förster, 1878</p>							England		BMNH, det. van Achterberg, added here
40656	Animalia		Arthropoda			Insecta			Hymenoptera			Ichneumonoidea	Braconidae	Brachistinae	Diospilini		Diospilus		morosus				Reinhard, 1862								England
40657	Animalia		Arthropoda			Insecta			Hymenoptera			Ichneumonoidea	Braconidae	Brachistinae	Diospilini		Diospilus		nigricornis				(Wesmael, 1835)	<p style="margin-left: 40px;"><i>Taphaeus nigricornis </i>Wesmael, 1835</p><p style="margin-left: 40px;"><i>affinis </i>(Wesmael, 1835, <i>Taphaeus</i>)</p><p style="margin-left: 40px;"><i>rufipes </i>Reinhard, 1862</p>							England		Listed as Taphaeus affinis and T. nigricornis in Huddleston (1978).
40658	Animalia		Arthropoda			Insecta			Hymenoptera			Ichneumonoidea	Braconidae	Brachistinae	Diospilini		Diospilus		oleraceus				Haliday, 1833	<p style="margin-left: 40px;"><i>conformis </i>(Wesmael, 1835, <i>Taphaeus</i>)</p><p style="margin-left: 40px;"><i>ruficornis </i>Szépligeti, 1896</p>							England, Ireland
40659	Animalia		Arthropoda			Insecta			Hymenoptera			Ichneumonoidea	Braconidae	Brachistinae	Diospilini		Diospilus		productus				Marshall, 1894								England
40660	Animalia		Arthropoda			Insecta			Hymenoptera			Ichneumonoidea	Braconidae	Brachistinae	Diospilini		Taphaeus						Wesmael, 1835	<p style="margin-left: 40px;"><i>Anostenus </i>Förster, 1863</p><p style="margin-left: 40px;"><i>Anastenus </i>Dalla Torre, 1898</p>									The systematic position of Taphaeus is uncertain. Treated as a genus of Blacinae in Fauna Europaea.
40661	Animalia		Arthropoda			Insecta			Hymenoptera			Ichneumonoidea	Braconidae	Brachistinae	Diospilini		Taphaeus		hiator				(Thunberg, 1824)	<p style="margin-left: 40px;"><i>Ichneumon hiator </i>Thunberg, 1824</p><p style="margin-left: 40px;"><i>irregularis </i>Wesmael, 1835</p><p style="margin-left: 40px;"><i>speculator </i>(Haliday, 1835, <i>Helcon</i>)</p><p style="margin-left: 40px;"><i>polydrusi </i>(Gahan, 1916, <i>Diospilus</i>)</p>							England, Scotland, Ireland
40662	Animalia		Arthropoda			Insecta			Hymenoptera			Ichneumonoidea	Braconidae	Brachistinae	Diospilini		Vadumasonium						Kammerer, 2006	<p style="margin-left: 40px;"><i>VADUM </i>Mason, 1987 preocc.</p>
40663	Animalia		Arthropoda			Insecta			Hymenoptera			Ichneumonoidea	Braconidae	Brachistinae	Diospilini		Vadumasonium		vardyorum				van Achterberg &amp; Broad, 2013								England		added by van Achterberg &amp; Broad (2013)
40664	Animalia		Arthropoda			Insecta			Hymenoptera			Ichneumonoidea	Braconidae	Brachistinae	Dyscoletini								van Achterberg, 1984										This is generally considered to be a tribe of Blacinae; we list the Dyscoletini as a tribe of Brachistinae because we follow Sharanowski et al. (2011) in including the Blacinae within Brachistinae.
40665	Animalia		Arthropoda			Insecta			Hymenoptera			Ichneumonoidea	Braconidae	Brachistinae	Dyscoletini		Dyscoletes						Haliday, 1840	<p style="margin-left: 40px;"><i>DYSCOLUS </i>Haliday, 1836 preocc.</p><p style="margin-left: 40px;"><i>DISCOLUS </i>misspelling</p><p style="margin-left: 40px;"><i>MICROCENTRUS </i>Szépligeti, 1904 preocc.</p><p style="margin-left: 40px;"><i>ELACHISTOCENTRUM </i>Schulz, 1911</p>
40666	Animalia		Arthropoda			Insecta			Hymenoptera			Ichneumonoidea	Braconidae	Brachistinae	Dyscoletini		Dyscoletes		lancifer				(Haliday, 1836)	<p style="margin-left: 40px;"><i>Dyscolus lancifer </i>Haliday, 1836</p><p style="margin-left: 40px;"><i>similis </i>(Szépligeti, 1896, <i>Discoletes</i>)</p>							England, Scotland
40667	Animalia		Arthropoda			Insecta			Hymenoptera			Ichneumonoidea	Braconidae	Braconinae									Nees, 1812										Tribal classification follows Belshaw et al. (2001) and Quicke (pers. comm.). For genera other than Bracon and Coeloides, Shaw (1994) and Shaw &amp; Quicke (1999) give distribution data.
40668	Animalia		Arthropoda			Insecta			Hymenoptera			Ichneumonoidea	Braconidae	Braconinae	Aphrastobraconini								Ashmead, 1900
40669	Animalia		Arthropoda			Insecta			Hymenoptera			Ichneumonoidea	Braconidae	Braconinae	Aphrastobraconini		Atanycolus						Förster, 1862										species excluded from the British and Irish list by Shaw &amp; Quicke (1999): [denigrator (Linnaeus, 1758, Ichneumon) incertus (Sulzer, 1776, Ichneumon) heteropus (Thomson, 1892, Bracon) albiscutis Telenga, 1936]
40670	Animalia		Arthropoda			Insecta			Hymenoptera			Ichneumonoidea	Braconidae	Braconinae	Aphrastobraconini		Cyanopterus						Haliday, 1835										species excluded from the British and Irish list by Shaw &amp; Quicke (1999): [flavator (Fabricius, 1793, Ichneumon) flavulator (Ratzeburg, 1844, Bracon) longipalpis (Thomson, 1892, Bracon) barcinonensis (Marshall, 1897, Coeloides)]
40671	Animalia		Arthropoda			Insecta			Hymenoptera			Ichneumonoidea	Braconidae	Braconinae	Aphrastobraconini		Pseudovipio						Szépligeti, 1896
40672	Animalia		Arthropoda			Insecta			Hymenoptera			Ichneumonoidea	Braconidae	Braconinae	Aphrastobraconini		Pseudovipio		guttiventris				(Thomson, 1892)	<p style="margin-left: 40px;"><i>Bracon guttiventris </i>Thomson, 1892</p><p style="margin-left: 40px;"><i>variegatus </i>(Boheman, 1853, <i>Agathis</i>) preocc.</p><p style="margin-left: 40px;"><i>biroi </i>Szépligeti, 1896</p>							England		Listed as Glyptomorpha variegata in Huddleston (1978).
40673	Animalia		Arthropoda			Insecta			Hymenoptera			Ichneumonoidea	Braconidae	Braconinae	Braconini		Vipio						Latreille, 1804										species excluded from the British and Irish list by Shaw &amp; Quicke (1999): [terrefactor (Villers, 1789, Ichneumon) improvisus Kokujev, 1898 interpellator Kokujev, 1898 neesii Kokujev, 1898] The only record was due to a misidentification of Pseudovipio guttiventris (Shaw &amp; Quicke, 1999).
40674	Animalia		Arthropoda			Insecta			Hymenoptera			Ichneumonoidea	Braconidae	Braconinae	Braconini								Nees, 1812
40675	Animalia		Arthropoda			Insecta			Hymenoptera			Ichneumonoidea	Braconidae	Braconinae	Braconini		Baryproctus						Ashmead, 1900	<p style="margin-left: 40px;"><i>Barycryptus </i>Hoffmeyer, 1932</p>
40676	Animalia		Arthropoda			Insecta			Hymenoptera			Ichneumonoidea	Braconidae	Braconinae	Braconini		Baryproctus		barypus				(Marshall, 1885)	<p style="margin-left: 40px;"><i>Bracon barypus </i>Marshall, 1885</p><p style="margin-left: 40px;"><i>hungaricus </i>Szépligeti, 1901</p><p style="margin-left: 40px;"><i>caucasicus </i>Telenga, 1936</p><p style="margin-left: 40px;"><i>apti </i>Györfi, 1953</p>							England		See Shaw (1994) and Jennings (2008) for recent records.
40677	Animalia		Arthropoda			Insecta			Hymenoptera			Ichneumonoidea	Braconidae	Braconinae	Braconini		Bracon						Fabricius, 1804										Comprehensive taxonomic revisions of Bracon are lacking for all but a few species groups. Published works differ substantially in their treatments of valid species, synonyms and subgeneric placements (compare, for example, the differing treatments of Tobias (1986), Papp (1974, 1996c), and Shenefelt (1979)) so the taxonomy in Taxapad (Yu et al., 2012) has, for the most part, been used as a default…
40678	Animalia		Arthropoda			Insecta			Hymenoptera			Ichneumonoidea	Braconidae	Braconinae	Braconini		Bracon	Bracon					Fabricius, 1804	<p style="margin-left: 40px;"><i>BRACO </i>Wesmael, 1838</p><p style="margin-left: 40px;"><i>BRACHON </i>Agassiz, 1846</p><p style="margin-left: 40px;"><i>TROPIDOBRACON </i>Ashmead, 1900</p><p style="margin-left: 40px;"><i>MICROBRACON </i>Ashmead, 1890</p><p style="margin-left: 40px;"><i>AMICOPLIDEA </i>Ashmead, 1900</p><p style="margin-left: 40px;"><i>MACRODYCTIUM </i>Ashmead, 1900</p><p style="…
40679	Animalia		Arthropoda			Insecta			Hymenoptera			Ichneumonoidea	Braconidae	Braconinae	Braconini		Bracon	Bracon	alutaceus				Szépligeti, 1901	<p style="margin-left: 40px;"><i>pygmaeus </i>Niezabitowski, 1910</p><p style="margin-left: 40px;"><i>polonicus </i>Fahringer, 1927</p><p style="margin-left: 40px;"><i>pallidalatus </i>Tobias, 1957</p>							England, Scotland		NMS, det. Papp, added here
40680	Animalia		Arthropoda			Insecta			Hymenoptera			Ichneumonoidea	Braconidae	Braconinae	Braconini		Bracon	Bracon	flavipes				Nees, 1834								England
40681	Animalia		Arthropoda			Insecta			Hymenoptera			Ichneumonoidea	Braconidae	Braconinae	Braconini		Bracon	Bracon	fulvipes				Nees, 1834	<p style="margin-left: 40px;"><i>carinatus </i>Szépligeti, 1901</p><p style="margin-left: 40px;"><i>marshalli </i>Vayssière, 1902 preocc.</p><p style="margin-left: 40px;"><i>glabratus </i>Fahringer, 1927</p><p style="margin-left: 40px;"><i>apionis </i>Strand, 1928</p><p style="margin-left: 40px;"><i>sylvanus </i>Greese, 1928</p><p style="margin-left: 40px;"><i>kiritshenkoi </i>Telenga, 1936</p>							England, Scotland, Wales, Ireland, Isle of Man
40682	Animalia		Arthropoda			Insecta			Hymenoptera			Ichneumonoidea	Braconidae	Braconinae	Braconini		Bracon	Bracon	intercessor				Nees, 1834	<p style="margin-left: 40px;"><i>laetus </i>(Wesmael, 1838, <i>Braco</i>)</p><p style="margin-left: 40px;"><i>lativentris </i>Thomson, 1892 preocc.</p><p style="margin-left: 40px;"><i>fulvus </i>Szépligeti, 1896</p><p style="margin-left: 40px;"><i>universitatis </i>Dalla Torre, 1898</p><p style="margin-left: 40px;"><i>adjectus </i>Szépligeti, 1901</p><p style="margin-left: 40px;"><i>bisinuatus </…							England, Scotland
40683	Animalia		Arthropoda			Insecta			Hymenoptera			Ichneumonoidea	Braconidae	Braconinae	Braconini		Bracon	Bracon	leptus				Marshall, 1897	<p style="margin-left: 40px;"><i>centaureae </i>Szépligeti, 1901</p><p style="margin-left: 40px;"><i>rufipedator </i>Szépligeti, 1901</p><p style="margin-left: 40px;"><i>rufipalpis </i>Szépligeti, 1901]</p>							England		Listed as British in Fauna Europaea, probably because it was described by Marshall, but the first published British record was by Jennings (2012).
40684	Animalia		Arthropoda			Insecta			Hymenoptera			Ichneumonoidea	Braconidae	Braconinae	Braconini		Bracon	Bracon	longicollis				(Wesmael, 1838)	<p style="margin-left: 40px;"><i>Braco longicollis </i>Wesmael, 1838</p><p style="margin-left: 40px;"><i>fraudator </i>Marshall, 1885</p><p style="margin-left: 40px;"><i>brevicauda </i>Thomson, 1892 preocc.</p><p style="margin-left: 40px;"><i>crassicauda </i>Thomson, 1892</p><p style="margin-left: 40px;"><i>pseudowesmaeli </i>Strand, 1928</p><p style="margin-left: 40px;"><i>wesmaeli </i>Fahringer…							England, Scotland, Wales, Isle of Man		spme distribution data from Papp (1999a)
40685	Animalia		Arthropoda			Insecta			Hymenoptera			Ichneumonoidea	Braconidae	Braconinae	Braconini		Bracon	Bracon	luteator				Spinola, 1808	<p style="margin-left: 40px;"><i>nigripedator </i>Nees, 1834</p><p style="margin-left: 40px;"><i>filicauda </i>Costa, 1888</p><p style="margin-left: 40px;"><i>hypopygialis </i>Szépligeti, 1901</p><p style="margin-left: 40px;"><i>intermedius </i>Szépligeti, 1901</p><p style="margin-left: 40px;"><i>pilosulus </i>Szépligeti, 1901</p>							England		added by Fulmek (1968) (omitted by Huddleston, 1978)
40686	Animalia		Arthropoda			Insecta			Hymenoptera			Ichneumonoidea	Braconidae	Braconinae	Braconini		Bracon	Bracon	nigratus				(Wesmael, 1838)	<p style="margin-left: 40px;"><i>Braco nigratus </i>Wesmael, 1838</p>							England, Ireland
40687	Animalia		Arthropoda			Insecta			Hymenoptera			Ichneumonoidea	Braconidae	Braconinae	Braconini		Bracon	Bracon	pectoralis				(Wesmael, 1838)	<p style="margin-left: 40px;"><i>Braco pectoralis </i>Wesmael, 1838</p><p style="margin-left: 40px;"><i>ochrosus </i>Szépligeti, 1896</p><p style="margin-left: 40px;"><i>sulphurator </i>Szépligeti, 1896</p><p style="margin-left: 40px;"><i>unicolor </i>Szépligeti, 1896</p><p style="margin-left: 40px;"><i>fumigatus </i>Szépligeti, 1901</p>							England
40688	Animalia		Arthropoda			Insecta			Hymenoptera			Ichneumonoidea	Braconidae	Braconinae	Braconini		Bracon	Bracon	rugulosus				Szépligeti, 1901	<p style="margin-left: 40px;"><i>depressiusculus </i>Szépligeti, 1901</p><p style="margin-left: 40px;"><i>neglectus </i>Szépligeti, 1904</p><p style="margin-left: 40px;"><i>spurnensis </i>Hincks, 1951</p>							England, Scotland, Wales		According to Taxapad (Yu et al., 2012), rugulosus Szépligeti is preoccupied by Bracon rugulosus Nees, 1811 (now classified as a species of Aleiodes, in Rogadinae). Omitted by Huddleston (1978).
40689	Animalia		Arthropoda			Insecta			Hymenoptera			Ichneumonoidea	Braconidae	Braconinae	Braconini		Bracon	Bracon	scutellaris				(Wesmael, 1838)	<p style="margin-left: 40px;"><i>Braco scutellaris </i>Wesmael, 1838</p>							England, Scotland, Ireland
40690	Animalia		Arthropoda			Insecta			Hymenoptera			Ichneumonoidea	Braconidae	Braconinae	Braconini		Bracon	Bracon	speerschneideri				Schmiedeknecht, 1897								England		added by Papp (1999b)
40691	Animalia		Arthropoda			Insecta			Hymenoptera			Ichneumonoidea	Braconidae	Braconinae	Braconini		Bracon	Bracon	subrugosus				Szépligeti, 1901	<p style="margin-left: 40px;"><i>sulcatulus </i>Szépligeti, 1896</p><p style="margin-left: 40px;"><i>subglaber </i>Szépligeti, 1901</p><p style="margin-left: 40px;"><i>quinquemaculatus </i>Szépligeti, 1901</p><p style="margin-left: 40px;"><i>trypetanus </i>Fahringer, 1927</p><p style="margin-left: 40px;"><i>tauricus </i>Telenga, 1936</p>							England		added by Papp (2008b)
40692	Animalia		Arthropoda			Insecta			Hymenoptera			Ichneumonoidea	Braconidae	Braconinae	Braconini		Bracon	Bracon	trucidator				Marshall, 1888	<p style="margin-left: 40px;"><i>minutator </i>misident.</p><p style="margin-left: 40px;"><i>bilineatus </i>Thomson, 1892</p><p style="margin-left: 40px;"><i>hilaris </i>Marshall, 1897</p><p style="margin-left: 40px;"><i>pannonicus </i>Szépligeti, 1901</p><p style="margin-left: 40px;"><i>marshalli </i>Telenga, 1936 preocc.</p>							England		BMNH, NMS, added here; previously confused under minutator (van Achterberg, pers. comm.). Both species are present in the BMNH and NMS collections, det. Papp and van Achterberg.
40693	Animalia		Arthropoda			Insecta			Hymenoptera			Ichneumonoidea	Braconidae	Braconinae	Braconini		Bracon	Bracon	variegator				Spinola, 1808	<p style="margin-left: 40px;"><i>melanosoma </i>Szépligeti, 1901</p><p style="margin-left: 40px;"><i>micros </i>Szépligeti, 1901</p><p style="margin-left: 40px;"><i>nanulus </i>Szépligeti, 1901</p><p style="margin-left: 40px;"><i>lineatellae </i>(Fischer, 1968, <i>Habrobracon</i>)</p>							England, Scotland, Ireland
40694	Animalia		Arthropoda			Insecta			Hymenoptera			Ichneumonoidea	Braconidae	Braconinae	Braconini		Bracon	Glabrobracon					Fahringer, 1927										Some taxonomic and distribution data from Papp (1999a,b, 2000). Species of Bracon (Glabrobracon) excluded from the British and Irish list [coniferarum Fahringer, 1928 ] Should not have been listed by Huddleston (1978) as it was recorded as British only on the basis of Carr’s Staffordshire lists (see Perkins, 1953; Fitton et al., 1978).
40695	Animalia		Arthropoda			Insecta			Hymenoptera			Ichneumonoidea	Braconidae	Braconinae	Braconini		Bracon	Glabrobracon	abbreviator				Nees, 1834	<p style="margin-left: 40px;"><i>abscissor </i>Nees, 1834</p><p style="margin-left: 40px;"><i>oestmaeli </i>(Wesmael, 1838, <i>Braco</i>)</p><p style="margin-left: 40px;"><i>regularis </i>(Wesmael, 1838, <i>Braco</i>)</p><p style="margin-left: 40px;"><i>eutrephes </i>Marshall, 1897</p><p style="margin-left: 40px;"><i>rufigaster </i>Szépligeti, 1901</p><p style="margin-left: 40px;"><i>rufiventris …							England
40696	Animalia		Arthropoda			Insecta			Hymenoptera			Ichneumonoidea	Braconidae	Braconinae	Braconini		Bracon	Glabrobracon	admotus				Papp, 2000								England		BMNH, det. Papp, added here
40697	Animalia		Arthropoda			Insecta			Hymenoptera			Ichneumonoidea	Braconidae	Braconinae	Braconini		Bracon	Glabrobracon	albion				Papp, 1999								England, Scotland		added by Papp (1999a)
40698	Animalia		Arthropoda			Insecta			Hymenoptera			Ichneumonoidea	Braconidae	Braconinae	Braconini		Bracon	Glabrobracon	arcuatus				Thomson, 1892								England, Scotland		added by Papp (2000); omitted by Huddleston (1978), listed by Kloet &amp; Hincks (1945), although it is not clear on what basis.
40699	Animalia		Arthropoda			Insecta			Hymenoptera			Ichneumonoidea	Braconidae	Braconinae	Braconini		Bracon	Glabrobracon	atrator				Nees, 1834	<p style="margin-left: 40px;"><i>longicauda </i>Thomson, 1892</p>							England, Scotland, Ireland
40700	Animalia		Arthropoda			Insecta			Hymenoptera			Ichneumonoidea	Braconidae	Braconinae	Braconini		Bracon	Glabrobracon	caudatus				Ratzeburg, 1848								England
40701	Animalia		Arthropoda			Insecta			Hymenoptera			Ichneumonoidea	Braconidae	Braconinae	Braconini		Bracon	Glabrobracon	claripennis				Thomson, 1892								England		added by Papp (2000)
40702	Animalia		Arthropoda			Insecta			Hymenoptera			Ichneumonoidea	Braconidae	Braconinae	Braconini		Bracon	Glabrobracon	colpophorus				(Wesmael, 1838)	<p style="margin-left: 40px;"><i>Braco colpophorus </i>Wesmael, 1838</p><p style="margin-left: 40px;"><i>mokrzeckii </i>Niezabitowski, 1927</p>							England
40703	Animalia		Arthropoda			Insecta			Hymenoptera			Ichneumonoidea	Braconidae	Braconinae	Braconini		Bracon	Glabrobracon	conjugellae				Bengtsson, 1924	<p style="margin-left: 40px;"><i>bengtssoni </i>Fahringer, 1928 preocc.</p><p style="margin-left: 40px;"><i>minor </i>Fahringer, 1928 preocc.</p><p style="margin-left: 40px;"><i>nanana </i>Strand, 1928</p>							England, Scotland		NMS, det. Papp, added here
40704	Animalia		Arthropoda			Insecta			Hymenoptera			Ichneumonoidea	Braconidae	Braconinae	Braconini		Bracon	Glabrobracon	curticaudis				Szépligeti, 1901								Scotland		added by Papp (2008b). Removed from synonymy with terebella by Papp (2008b).
40705	Animalia		Arthropoda			Insecta			Hymenoptera			Ichneumonoidea	Braconidae	Braconinae	Braconini		Bracon	Glabrobracon	delibator				Haliday, 1833	<p style="margin-left: 40px;"><i>anthracinus </i>Nees, 1834</p><p style="margin-left: 40px;"><i>breviseta </i>Fahringer, 1935</p>							England, Scotland, Ireland
40706	Animalia		Arthropoda			Insecta			Hymenoptera			Ichneumonoidea	Braconidae	Braconinae	Braconini		Bracon	Glabrobracon	fuscicoxis				(Wesmael, 1838)	<p style="margin-left: 40px;"><i>Braco fuscicoxis </i>Wesmael, 1838</p><p style="margin-left: 40px;"><i>levicarinatus </i>Niezabitowski, 1910</p>							England
40707	Animalia		Arthropoda			Insecta			Hymenoptera			Ichneumonoidea	Braconidae	Braconinae	Braconini		Bracon	Glabrobracon	glaphyrus				Marshall, 1897								England		Faure (1924) mentions English material but glaphyrus was omitted by Huddleston (1978).
40708	Animalia		Arthropoda			Insecta			Hymenoptera			Ichneumonoidea	Braconidae	Braconinae	Braconini		Bracon	Glabrobracon	guttator				Panzer, 1804								England		Omitted by Huddleston (1978); recorded as British by Fulmek (1968), although we are not sure how reliably; English material in NMS.
40709	Animalia		Arthropoda			Insecta			Hymenoptera			Ichneumonoidea	Braconidae	Braconinae	Braconini		Bracon	Glabrobracon	immutator				Nees, 1834	<p style="margin-left: 40px;"><i>efoveolatus </i>Thomson, 1892</p><p style="margin-left: 40px;"><i>hemirugosus </i>Szépligeti, 1901</p><p style="margin-left: 40px;"><i>flavicoxanus </i>Strand, 1928</p><p style="margin-left: 40px;"><i>marshalli </i>Fahringer, 1927 preocc.</p><p style="margin-left: 40px;"><i>romani </i>Fahringer, 1927 preocc.</p><p style="margin-left: 40px;"><i>uplandiae </i>Strand…							England, Scotland
40710	Animalia		Arthropoda			Insecta			Hymenoptera			Ichneumonoidea	Braconidae	Braconinae	Braconini		Bracon	Glabrobracon	instabilis				Marshall, 1897								England
40711	Animalia		Arthropoda			Insecta			Hymenoptera			Ichneumonoidea	Braconidae	Braconinae	Braconini		Bracon	Glabrobracon	kopelkei				Papp, 2000								England		BMNH, det. Papp, added here
40712	Animalia		Arthropoda			Insecta			Hymenoptera			Ichneumonoidea	Braconidae	Braconinae	Braconini		Bracon	Glabrobracon	longulus				Thomson, 1892								England, Scotland		NMS, det. Papp, added here
40713	Animalia		Arthropoda			Insecta			Hymenoptera			Ichneumonoidea	Braconidae	Braconinae	Braconini		Bracon	Glabrobracon	marshalli				Szépligeti, 1901	<p style="margin-left: 40px;"><i>obscurator </i>misident.</p>							England, Scotland		added by Papp (2000); omitted by Huddleston (1978), listed by Kloet &amp; Hincks (1945), although it is not clear on what basis.
40714	Animalia		Arthropoda			Insecta			Hymenoptera			Ichneumonoidea	Braconidae	Braconinae	Braconini		Bracon	Glabrobracon	minutator				(Fabricius, 1798)	<p style="margin-left: 40px;"><i>Ichneumon minutator </i>Fabricius, 1798</p><p style="margin-left: 40px;"><i>thalassinus </i>Schmiedeknecht, 1897</p><p style="margin-left: 40px;"><i>tener </i>Szépligeti, 1904</p><p style="margin-left: 40px;"><i>abscissoris </i>Strand, 1928</p><p style="margin-left: 40px;"><i>flavipalpula </i>Strand, 1928</p><p style="margin-left: 40px;"><i>flavipalpis </i>Fahring…							England, Ireland		Bracon minutator auct. is trucidator Marshall (van Achterberg, pers. comm.).
40715	Animalia		Arthropoda			Insecta			Hymenoptera			Ichneumonoidea	Braconidae	Braconinae	Braconini		Bracon	Glabrobracon	momphae				Papp, 1999								England, Scotland		added by Papp (1999a)
40716	Animalia		Arthropoda			Insecta			Hymenoptera			Ichneumonoidea	Braconidae	Braconinae	Braconini		Bracon	Glabrobracon	nigricollis				(Wesmael, 1838)	<p style="margin-left: 40px;"><i>Braco nigricollis </i>Wesmael, 1838</p><p style="margin-left: 40px;"><i>brunneomaculatus </i>Schütze &amp; Roman, 1931</p>							England		NMS, det. Papp, added here
40717	Animalia		Arthropoda			Insecta			Hymenoptera			Ichneumonoidea	Braconidae	Braconinae	Braconini		Bracon	Glabrobracon	obscurator				Nees, 1811	<p style="margin-left: 40px;"><i>kotulai </i>Niezabitowski, 1910</p><p style="margin-left: 40px;"><i>nigripes </i>Fahringer, 1928 preocc.</p><p style="margin-left: 40px;"><i>rytrensis </i>Fahringer, 1928 preocc.</p><p style="margin-left: 40px;"><i>rytronis </i>Strand, 1928</p><p style="margin-left: 40px;"><i>zaleszczykiensis </i>Strand, 1928</p>							England, Scotland, Wales
40718	Animalia		Arthropoda			Insecta			Hymenoptera			Ichneumonoidea	Braconidae	Braconinae	Braconini		Bracon	Glabrobracon	otiosus				Marshall, 1885	<p style="margin-left: 40px;"><i>macrurus </i>Thomson, 1892</p><p style="margin-left: 40px;"><i>explorator </i>Szépligeti, 1904 preocc.</p><p style="margin-left: 40px;"><i>pumilionis </i>Roman, 1928</p>							England		Treated as a synonym of bipartitus (=variator) by Belokobylskij et al. (2003).
40719	Animalia		Arthropoda			Insecta			Hymenoptera			Ichneumonoidea	Braconidae	Braconinae	Braconini		Bracon	Glabrobracon	pallicarpus				Thomson, 1892								England		added by Papp (2000)
40720	Animalia		Arthropoda			Insecta			Hymenoptera			Ichneumonoidea	Braconidae	Braconinae	Braconini		Bracon	Glabrobracon	parvicornis				Thomson, 1892	<p style="margin-left: 40px;"><i>carbonarius </i>Szépligeti, 1901 preocc.</p><p style="margin-left: 40px;"><i>aterrimus </i>Telenga, 1936 preocc.</p>							England		NMS, det. Papp, added here
40721	Animalia		Arthropoda			Insecta			Hymenoptera			Ichneumonoidea	Braconidae	Braconinae	Braconini		Bracon	Glabrobracon	parvulus				Wesmael, 1838	<p style="margin-left: 40px;"><i>fumipennis </i>Thomson, 1892</p><p style="margin-left: 40px;"><i>fuscipennis </i>Thomson, 1892 preocc.</p><p style="margin-left: 40px;"><i>thomsoni </i>Marshall, 1897</p>							England, Scotland, Wales		NMS, det. Papp, added here
40722	Animalia		Arthropoda			Insecta			Hymenoptera			Ichneumonoidea	Braconidae	Braconinae	Braconini		Bracon	Glabrobracon	pineti				Thomson, 1892								England		NMS, det. Papp, added here
40723	Animalia		Arthropoda			Insecta			Hymenoptera			Ichneumonoidea	Braconidae	Braconinae	Braconini		Bracon	Glabrobracon	praecox				(Wesmael, 1838)	<p style="margin-left: 40px;"><i>Braco praecox </i>Wesmael, 1838</p><p style="margin-left: 40px;"><i>biorrhizae </i>Fahringer, 1928</p><p style="margin-left: 40px;"><i>elongatus </i>Dutu-Lacatusu, 1956 preocc.</p>							Scotland		NMS, det. Papp, added here
40724	Animalia		Arthropoda			Insecta			Hymenoptera			Ichneumonoidea	Braconidae	Braconinae	Braconini		Bracon	Glabrobracon	ratzeburgii				Dalla Torre, 1898	<p style="margin-left: 40px;"><i>longicaudis </i>Ratzeburg, 1852 preocc.</p>							England
40725	Animalia		Arthropoda			Insecta			Hymenoptera			Ichneumonoidea	Braconidae	Braconinae	Braconini		Bracon	Glabrobracon	terebella				(Wesmael, 1838)	<p style="margin-left: 40px;"><i>Braco terebella </i>Wesmael, 1838</p><p style="margin-left: 40px;"><i>breviterebris </i>Fahringer, 1928</p><p style="margin-left: 40px;"><i>miaricola </i>Strand, 1928</p><p style="margin-left: 40px;"><i>wesmaeli </i>Fahringer, 1928 preocc.</p><p style="margin-left: 40px;"><i>unicolor </i>Telenga, 1936 preocc.</p>							England
40726	Animalia		Arthropoda			Insecta			Hymenoptera			Ichneumonoidea	Braconidae	Braconinae	Braconini		Bracon	Glabrobracon	variator				Nees, 1811	<p style="margin-left: 40px;"><i>bipartitus </i>(Wesmael, 1838, <i>Braco</i>)</p><p style="margin-left: 40px;"><i>maculiger </i>(Wesmael, 1838, <i>Braco</i>)</p><p style="margin-left: 40px;"><i>collinus </i>Szépligeti, 1901</p><p style="margin-left: 40px;"><i>breviventris </i>Szépligeti, 1901</p><p style="margin-left: 40px;"><i>rytrensis </i>Niezabitowski, 1910</p><p style="margin-left: 40px;"><i…							England, Scotland, Wales, Ireland		Braco bipartitus is listed as a subspecies of variator in Taxapad. Listed as a British species by Huddleston (1978) but this actually refers to otiosus.
40727	Animalia		Arthropoda			Insecta			Hymenoptera			Ichneumonoidea	Braconidae	Braconinae	Braconini		Bracon	Glabrobracon	xanthogaster				Nees, 1834	<p style="margin-left: 40px;"><i>breviseta </i>Hedwig, 1961 preocc.</p>							England		NMS, det. Papp, added here
40728	Animalia		Arthropoda			Insecta			Hymenoptera			Ichneumonoidea	Braconidae	Braconinae	Braconini		Bracon	Habrobracon					Ashmead, 1895
40729	Animalia		Arthropoda			Insecta			Hymenoptera			Ichneumonoidea	Braconidae	Braconinae	Braconini		Bracon	Habrobracon	concolorans				Marshall, 1900	<p style="margin-left: 40px;"><i>concolor </i>Thomson, 1892 preocc.</p><p style="margin-left: 40px;"><i>nigricans </i>(Szépligeti, 1901, <i>Habrobracon</i>)</p><p style="margin-left: 40px;"><i>mongolicus </i>(Telenga, 1936, <i>Habrobracon</i>)</p>							England, Scotland, Ireland		added by Papp (2008a). Removed from synonymy with stabilis by Papp (2008a).
40730	Animalia		Arthropoda			Insecta			Hymenoptera			Ichneumonoidea	Braconidae	Braconinae	Braconini		Bracon	Habrobracon	crassicornis				Thomson, 1894	<p style="margin-left: 40px;"><i>flavosignatus </i>(Tobias, 1957, <i>Habrobracon</i>)</p>							England, Scotland		added by Papp (2008a)
40731	Animalia		Arthropoda			Insecta			Hymenoptera			Ichneumonoidea	Braconidae	Braconinae	Braconini		Bracon	Habrobracon	hebetor				Say, 1836	<p style="margin-left: 40px;"><i>dorsator </i>Say, 1836</p><p style="margin-left: 40px;"><i>brevicornis </i>(Wesmael, 1838, <i>Braco</i>)</p><p style="margin-left: 40px;"><i>juglandis </i>Ashmead, 1889</p><p style="margin-left: 40px;"><i>brunneus </i>(Szépligeti, 1901, <i>Habrobracon</i>)</p><p style="margin-left: 40px;"><i>vernalis </i>(Szépligeti, 1901, <i>Habrobracon</i>)</p><p style="margin-l…							England		Mainly an indoors species in Britain, attacking pests of stored products; brevicornis been variously treated as a valid species or as a synonym of hebetor, being listed under the latter in Taxapad and by Papp (2008a). Both brevicornis and hebetor have been recorded as British.
40732	Animalia		Arthropoda			Insecta			Hymenoptera			Ichneumonoidea	Braconidae	Braconinae	Braconini		Bracon	Habrobracon	stabilis				(Wesmael, 1838)	<p style="margin-left: 40px;"><i>Braco stabilis </i>Wesmael, 1838</p><p style="margin-left: 40px;"><i>opacus </i>Stelfox, 1953 preocc.</p>							England, Ireland
40733	Animalia		Arthropoda			Insecta			Hymenoptera			Ichneumonoidea	Braconidae	Braconinae	Braconini		Bracon	Lucobracon					Fahringer, 1927										species of Bracon (Lucobracon) excluded from the British and Irish list [strobilorum Ratzeburg, 1848 ] England and Ireland are listed under the distribution in Shenefelt (1979), and Britain in Fauna Europaea, but we have been unable to trace any British or Irish literature records or specimens. In Belokobylskij et al. (2003) and in Taxapad this is listed as a species of Coeloides but Papp (1992) …
40734	Animalia		Arthropoda			Insecta			Hymenoptera			Ichneumonoidea	Braconidae	Braconinae	Braconini		Bracon	Lucobracon	brachycerus				Thomson, 1892	<p style="margin-left: 40px;"><i>kudsiricus </i>Papp, 1965</p>							England		NMS, det. Papp, added here
40735	Animalia		Arthropoda			Insecta			Hymenoptera			Ichneumonoidea	Braconidae	Braconinae	Braconini		Bracon	Lucobracon	crassungula				Thomson, 1892								England		NMS, BMNH, det. Papp, added here
40736	Animalia		Arthropoda			Insecta			Hymenoptera			Ichneumonoidea	Braconidae	Braconinae	Braconini		Bracon	Lucobracon	erraticus				(Wesmael, 1838)	<p style="margin-left: 40px;"><i>Braco erraticus </i>Wesmael, 1838</p><p style="margin-left: 40px;"><i>superciliosus </i>(Wesmael, 1838, <i>Braco</i>)</p><p style="margin-left: 40px;"><i>erythrostictus </i>Marshall, 1885</p><p style="margin-left: 40px;"><i>exarator </i>Marshall, 1885</p><p style="margin-left: 40px;"><i>praetermissus </i>Marshall, 1885</p><p style="margin-left: 40px;"><i>vectensis…							England, Scotland, Ireland, Isle of Man		Although pratermissus was synonymised with Bracon erraticus by Papp (1999a), this has not been followed by Belokobylskij et al. (2003).
40737	Animalia		Arthropoda			Insecta			Hymenoptera			Ichneumonoidea	Braconidae	Braconinae	Braconini		Bracon	Lucobracon	flagellaris				Thomson, 1892	<p style="margin-left: 40px;"><i>facialis </i>Thomson, 1892 preocc.</p><p style="margin-left: 40px;"><i>thomsonii </i>Dalla Torre, 1898 preocc.</p><p style="margin-left: 40px;"><i>dallatorrei </i>Szépligeti, 1901</p>							England		BMNH, det. Papp, added here
40738	Animalia		Arthropoda			Insecta			Hymenoptera			Ichneumonoidea	Braconidae	Braconinae	Braconini		Bracon	Lucobracon	grandiceps				Thomson, 1892	<p style="margin-left: 40px;"><i>gallicus </i>Thomson, 1892</p>							Scotland		NMS, BMNH, det. Papp, added here
40739	Animalia		Arthropoda			Insecta			Hymenoptera			Ichneumonoidea	Braconidae	Braconinae	Braconini		Bracon	Lucobracon	guttiger				(Wesmael, 1838)	<p style="margin-left: 40px;"><i>Braco guttiger </i>Wesmael, 1838</p><p style="margin-left: 40px;"><i>fasciatus </i>Fahringer, 1927</p>							England, Scotland
40740	Animalia		Arthropoda			Insecta			Hymenoptera			Ichneumonoidea	Braconidae	Braconinae	Braconini		Bracon	Lucobracon	hylobii				Ratzeburg, 1848	<p style="margin-left: 40px;"><i>bruchorum </i>Fahringer, 1934</p>							England, Scotland
40741	Animalia		Arthropoda			Insecta			Hymenoptera			Ichneumonoidea	Braconidae	Braconinae	Braconini		Bracon	Lucobracon	larvicida				(Wesmael, 1838)	<p style="margin-left: 40px;"><i>Braco larvicida </i>Wesmael, 1838</p><p style="margin-left: 40px;"><i>crassiusculus </i>Szépligeti, 1901</p><p style="margin-left: 40px;"><i>romani </i>Fahringer, 1927 preocc.</p><p style="margin-left: 40px;"><i>szepligetii </i>Fahringer, 1927 preocc.</p><p style="margin-left: 40px;"><i>fahringeriensis </i>Strand, 1928</p><p style="margin-left: 40px;"><i>pseudorom…							England
40742	Animalia		Arthropoda			Insecta			Hymenoptera			Ichneumonoidea	Braconidae	Braconinae	Braconini		Bracon	Lucobracon	nigriventris				Wesmael, 1838, Braco)	<p style="margin-left: 40px;"><i>Braco nigriventris </i>Wesmael, 1838</p><p style="margin-left: 40px;"><i>subornatus </i>Szépligeti, 1901</p><p style="margin-left: 40px;"><i>biroi </i>Fahringer, 1927</p><p style="margin-left: 40px;"><i>minor </i>Fahringer, 1927</p><p style="margin-left: 40px;"><i>albanicus </i>Telenga, 1936</p><p style="margin-left: 40px;"><i>laticeps </i>Telenga, 1936</p><p styl…							England		NMS, det. Papp, added here
40743	Animalia		Arthropoda			Insecta			Hymenoptera			Ichneumonoidea	Braconidae	Braconinae	Braconini		Bracon	Lucobracon	sphaerocephalus				Szépligeti, 1901	<p style="margin-left: 40px;"><i>globiceps </i>Szépligeti, 1901</p>							England, Scotland		NMS, det. Papp, added here
40744	Animalia		Arthropoda			Insecta			Hymenoptera			Ichneumonoidea	Braconidae	Braconinae	Braconini		Bracon	Lucobracon	thuringiacus				Schmiedeknecht, 1897	<p style="margin-left: 40px;"><i>schmiedeknechti </i>Fahringer, 1927 preocc.</p><p style="margin-left: 40px;"><i>blankenburgiae </i>Strand, 1928</p>							England		added by Papp (1999b)
40745	Animalia		Arthropoda			Insecta			Hymenoptera			Ichneumonoidea	Braconidae	Braconinae	Braconini		Bracon	Lucobracon	tornator				Marshall, 1885	<p style="margin-left: 40px;"><i>aequalis </i>Thomson, 1892</p>							England, Scotland, Wales		some distribution data from Papp (1997)
40746	Animalia		Arthropoda			Insecta			Hymenoptera			Ichneumonoidea	Braconidae	Braconinae	Braconini		Bracon	Lucobracon	triangularis				Nees, 1834								England, Ireland
40747	Animalia		Arthropoda			Insecta			Hymenoptera			Ichneumonoidea	Braconidae	Braconinae	Braconini		Bracon	Orthobracon					Fahringer, 1927										species of Bracon (Orthobracon) excluded from the British and Irish list [tenuicornis (Wesmael, 1838, Braco) ] Probably not a valid British or Irish species now that B. (Lucobracon) erythrostictus has been taken out of synonymy (Papp 1999a).
40748	Animalia		Arthropoda			Insecta			Hymenoptera			Ichneumonoidea	Braconidae	Braconinae	Braconini		Bracon	Orthobracon	discoideus				(Wesmael, 1838)	<p style="margin-left: 40px;"><i>Braco discoideus </i>Wesmael, 1838</p><p style="margin-left: 40px;"><i>opionus </i>Fahringer, 1928</p><p style="margin-left: 40px;"><i>sculpturatus </i>Fahringer, 1928</p><p style="margin-left: 40px;"><i>sculpturifera </i>Strand, 1928</p>							England, Scotland, Ireland
40749	Animalia		Arthropoda			Insecta			Hymenoptera			Ichneumonoidea	Braconidae	Braconinae	Braconini		Bracon	Orthobracon	epitriptus				Marshall, 1885	<p style="margin-left: 40px;"><i>pallidipes </i>Szépligeti, 1896</p><p style="margin-left: 40px;"><i>melanogaster </i>Szépligeti, 1901</p>							England, Scotland, Wales, Ireland		some distribution data from Papp (1999a)
40750	Animalia		Arthropoda			Insecta			Hymenoptera			Ichneumonoidea	Braconidae	Braconinae	Braconini		Bracon	Orthobracon	exhilarator				Nees, 1834	<p style="margin-left: 40px;"><i>satanas </i>(Wesmael, 1838, <i>Braco</i>)</p><p style="margin-left: 40px;"><i>tibialis </i>Zetterstedt, 1838</p><p style="margin-left: 40px;"><i>striolatus </i>Thomson, 1892</p><p style="margin-left: 40px;"><i>marshalli </i>Fahringer, 1927 preocc,</p><p style="margin-left: 40px;"><i>polonicus </i>Fahringer, 1927 preocc.</p><p style="margin-left: 40px;"><i>polonice…							England, Scotland, Wales, Isle of Man
40751	Animalia		Arthropoda			Insecta			Hymenoptera			Ichneumonoidea	Braconidae	Braconinae	Braconini		Bracon	Orthobracon	filicornis				Thomson, 1892								Scotland		NMS, det. Papp, added here
40752	Animalia		Arthropoda			Insecta			Hymenoptera			Ichneumonoidea	Braconidae	Braconinae	Braconini		Bracon	Orthobracon	laevigatissimus				Dalla Torre, 1898	<p style="margin-left: 40px;"><i>laevigatus </i>Ratzeburg, 1852 preocc.</p>							England		Omitted by Huddleston (1978); listed as British by various authors dating back to Marshall (1885).
40753	Animalia		Arthropoda			Insecta			Hymenoptera			Ichneumonoidea	Braconidae	Braconinae	Braconini		Bracon	Orthobracon	mediator				Nees, 1834								England, Scotland, Ireland
40754	Animalia		Arthropoda			Insecta			Hymenoptera			Ichneumonoidea	Braconidae	Braconinae	Braconini		Bracon	Orthobracon	ochropus				Nees, 1834	<p style="margin-left: 40px;"><i>marshalli </i>Fahringer, 1927 preocc.</p><p style="margin-left: 40px;"><i>neesi </i>Fahringer, 1927</p><p style="margin-left: 40px;"><i>ochropodis </i>Strand, 1928</p>							England, Scotland		NMS, det. Papp, added here
40755	Animalia		Arthropoda			Insecta			Hymenoptera			Ichneumonoidea	Braconidae	Braconinae	Braconini		Bracon	Orthobracon	orbus				Papp, 1981								England		NMS, det. Papp, added here
40756	Animalia		Arthropoda			Insecta			Hymenoptera			Ichneumonoidea	Braconidae	Braconinae	Braconini		Bracon	Orthobracon	picticornis				Wesmael, 1838	<p style="margin-left: 40px;"><i>gallarum </i>Ratzeburg, 1852</p><p style="margin-left: 40px;"><i>versicolor </i>Szépligeti, 1901</p><p style="margin-left: 40px;"><i>ratzeburgensis </i>Strand, 1928</p><p style="margin-left: 40px;"><i>laevigatus </i>Fahringer, 1927 preocc.</p>							England, Ireland
40757	Animalia		Arthropoda			Insecta			Hymenoptera			Ichneumonoidea	Braconidae	Braconinae	Braconini		Bracon	Orthobracon	procerus				Papp, 1965								England		NMS, det. Papp, added here
40758	Animalia		Arthropoda			Insecta			Hymenoptera			Ichneumonoidea	Braconidae	Braconinae	Braconini		Bracon	Orthobracon	pulcher				Bengtsson, 1924	<p style="margin-left: 40px;"><i>bengtssoni </i>Fahringer, 1927</p>							England		NMS, det. Papp, added here
40759	Animalia		Arthropoda			Insecta			Hymenoptera			Ichneumonoidea	Braconidae	Braconinae	Braconini		Bracon	Orthobracon	roberti				(Wesmael, 1838)	<p style="margin-left: 40px;"><i>Braco roberti </i>Wesmael, 1838</p>							England, Ireland
40760	Animalia		Arthropoda			Insecta			Hymenoptera			Ichneumonoidea	Braconidae	Braconinae	Braconini		Bracon	Orthobracon	romani				Fahringer, 1927								England, Scotland, Wales, Ireland		NMS, det. Papp, added here
40761	Animalia		Arthropoda			Insecta			Hymenoptera			Ichneumonoidea	Braconidae	Braconinae	Braconini		Bracon	Orthobracon	subcylindricus				(Wesmael, 1838)	<p style="margin-left: 40px;"><i>Braco subcylindricus </i>Wesmael, 1838</p><p style="margin-left: 40px;"><i>niger </i>(Vojnovskaja-Krieger, 1929, <i>Baryproctus</i>)</p>							England
40762	Animalia		Arthropoda			Insecta			Hymenoptera			Ichneumonoidea	Braconidae	Braconinae	Braconini		Bracon	Orthobracon	subsinuatus				Szépligeti, 1901								England, Scotland, Ireland		added by Papp (2008b). Removed from synonymy with epitriptus by Papp (2008b), who treats both species as belonging to the subgenus Glabrobracon, contrary to their placement in Taxapad.
40763	Animalia		Arthropoda			Insecta			Hymenoptera			Ichneumonoidea	Braconidae	Braconinae	Braconini		Bracon	Orthobracon	titubans				(Wesmael, 1838)	<p style="margin-left: 40px;"><i>Braco titubans </i>Wesmael, 1838</p><p style="margin-left: 40px;"><i>tarsator </i>Thomson, 1892</p><p style="margin-left: 40px;"><i>terebrator </i>Szépligeti, 1901</p>							England		NMS, BMNH, det. Papp, added here
40764	Animalia		Arthropoda			Insecta			Hymenoptera			Ichneumonoidea	Braconidae	Braconinae	Braconini		Bracon	Orthobracon	virgatus				Marshall, 1897	<p style="margin-left: 40px;"><i>lineifer </i>van Achterberg, 1988</p>							England, Scotland		some distribution data from Shaw &amp; Bailey (1991)
40765	Animalia		Arthropoda			Insecta			Hymenoptera			Ichneumonoidea	Braconidae	Braconinae	Braconini		Bracon	Osculobracon					Papp, 2008
40766	Animalia		Arthropoda			Insecta			Hymenoptera			Ichneumonoidea	Braconidae	Braconinae	Braconini		Bracon	Osculobracon	osculator				Nees, 1811	<p style="margin-left: 40px;"><i>bisignatus </i>(Wesmael, 1838, <i>Braco</i>)</p><p style="margin-left: 40px;"><i>degenerator </i>Marshall, 1885</p><p style="margin-left: 40px;"><i>minutus </i>Szépligeti, 1901</p><p style="margin-left: 40px;"><i>temporalis </i>Telenga, 1936</p><p style="margin-left: 40px;"><i>venustus </i>Telenga, 1936</p>							England, Scotland, Wales, Ireland
40767	Animalia		Arthropoda			Insecta			Hymenoptera			Ichneumonoidea	Braconidae	Braconinae	Braconini		Bracon	Pigeria					van Achterberg, 1985										Described as a separate genus but Quicke &amp; Sharkey (1989) suggested that Pigeria could be treated as a subgenus of Bracon, which was followed by Papp (1998).
40768	Animalia		Arthropoda			Insecta			Hymenoptera			Ichneumonoidea	Braconidae	Braconinae	Braconini		Bracon	Pigeria	piger				(Wesmael, 1838)	<p style="margin-left: 40px;"><i>Braco piger </i>Wesmael, 1838</p><p style="margin-left: 40px;"><i>rotundatus </i>Szépligeti, 1901</p><p style="margin-left: 40px;"><i>rotundulus </i>Szépligeti, 1904</p>							England, Ireland		Bracon semiluteus Walker, 1874 is not a synonym of piger (contra Morley (1913) and subsequent authors) but is a junior synonym of another species of Bracon (Papp, in prep.).
40769	Animalia		Arthropoda			Insecta			Hymenoptera			Ichneumonoidea	Braconidae	Braconinae	Braconini		Bracon	Pigeria	wolschrijni				(van Achterberg, 1985)	<p style="margin-left: 40px;"><i>Pigeria wolschrijni </i>van Achterberg, 1985</p>							Wales		NMS, det. van Achterberg, added here
40770	Animalia		Arthropoda			Insecta			Hymenoptera			Ichneumonoidea	Braconidae	Braconinae	Braconini		Bracon	Rostrobracon					Tobias, 1957										species of Bracon (Rostrobracon) excluded from the British and Irish list: [urinator (Fabricius, 1798, Ichneumon) cuspidator (Rossi, 1792, Ichneumon) comptus Marshall, 1897] Marshall (1900) mentions an English specimen but this seems unlikely in view of its present southern European range.
40771	Animalia		Arthropoda			Insecta			Hymenoptera			Ichneumonoidea	Braconidae	Braconinae	Coeloidini								Tobias, 1957
40772	Animalia		Arthropoda			Insecta			Hymenoptera			Ichneumonoidea	Braconidae	Braconinae	Coeloidini		Coeloides						Wesmael, 1838	<p style="margin-left: 40px;"><i>SYNTOMOMELUS </i>Kokujev, 1902</p><p style="margin-left: 40px;"><i>HABROBRACONIDEA </i>Viereck, 1912</p><p style="margin-left: 40px;"><i>COELOIDINA </i>Viereck, 1921</p><p style="margin-left: 40px;"><i>CEROBRACON </i>Viereck, 1926</p>									Distribution data from Shaw (2000b).
40773	Animalia		Arthropoda			Insecta			Hymenoptera			Ichneumonoidea	Braconidae	Braconinae	Coeloidini		Coeloides		abdominalis				(Zetterstedt, 1838)	<p style="margin-left: 40px;"><i>Bracon abdominalis </i>Zetterstedt, 1838</p>							England
40774	Animalia		Arthropoda			Insecta			Hymenoptera			Ichneumonoidea	Braconidae	Braconinae	Coeloidini		Coeloides		filiformis				Ratzeburg, 1852	<p style="margin-left: 40px;"><i>melanurus </i>Ivanov, 1896</p>							England		added by Shaw (2000b)
40775	Animalia		Arthropoda			Insecta			Hymenoptera			Ichneumonoidea	Braconidae	Braconinae	Coeloidini		Coeloides		melanostigma				Strand, 1918	<p style="margin-left: 40px;"><i>sordidator </i>misident.</p><p style="margin-left: 40px;"><i>stigmaticus </i>Hellén, 1928</p>							England		Added by Shaw (2000b); according to Haeselbarth (in Belokobylskij et al., 2003), the name sordidator (Ratzeburg, 1844, Bracon) probably does not belong in Coeloides, so the species usually referred to as sordidator takes the name melanostigma.
40776	Animalia		Arthropoda			Insecta			Hymenoptera			Ichneumonoidea	Braconidae	Braconinae	Coeloidini		Coeloides		melanotus				Wesmael, 1838	<p style="margin-left: 40px;"><i>flavus </i>Ivanov, 1896</p><p style="margin-left: 40px;"><i>maculatus </i>Ivanov, 1896</p>							England, Wales
40777	Animalia		Arthropoda			Insecta			Hymenoptera			Ichneumonoidea	Braconidae	Braconinae	Coeloidini		Coeloides		scolyticida				Wesmael, 1838	<p style="margin-left: 40px;"><i>initiatellus </i>(Ratzeburg, 1848, <i>Bracon</i>)</p>							England
40778	Animalia		Arthropoda			Insecta			Hymenoptera			Ichneumonoidea	Braconidae	Cardiochilinae									Ashmead, 1900										no British or Irish species
40779	Animalia		Arthropoda			Insecta			Hymenoptera			Ichneumonoidea	Braconidae	Cardiochilinae			Cardiochiles						Nees, 1819	<p style="margin-left: 40px;"><i>Ditherus </i>Cameron, 1902</p>									species of Cardiochiles excluded from the British and Irish list: [saltator (Fabricius, 1781, Ichneumon)] brachialis Rondani, 1877 katkowi Kokujev, 1895 fumipennis Szépligeti, 1901 sibiricus Telenga, 1955] not British, recorded in error (Shaw &amp; Huddleston, 1991)
40780	Animalia		Arthropoda			Insecta			Hymenoptera			Ichneumonoidea	Braconidae	Cenocoeliinae									Szépligeti, 1901										Distribution data from Shaw (1999).
40781	Animalia		Arthropoda			Insecta			Hymenoptera			Ichneumonoidea	Braconidae	Cenocoeliinae			Cenocoelius						Haliday, 1840	<p style="margin-left: 40px;"><i>LACCOPHRYS </i>Förster, 1863</p><p style="margin-left: 40px;"><i>PROMACHUS </i>Cresson, 1887 preocc.</p><p style="margin-left: 40px;"><i>CAENOCOELIUS </i>Marshall,1894</p><p style="margin-left: 40px;"><i>POSTPROMACHUS </i>Maes,1999</p>
40782	Animalia		Arthropoda			Insecta			Hymenoptera			Ichneumonoidea	Braconidae	Cenocoeliinae			Cenocoelius		aartseni				(van Achterberg, 1994)	<p style="margin-left: 40px;"><i>Promachus aartseni </i>van Achterberg, 1994</p>							England		added by Shaw (1999)
40783	Animalia		Arthropoda			Insecta			Hymenoptera			Ichneumonoidea	Braconidae	Cenocoeliinae			Cenocoelius		analis				(Nees, 1834)	<p style="margin-left: 40px;"><i>Bracon analis </i>Nees, 1834</p><p style="margin-left: 40px;"><i>flavifrons </i>Haliday, 1840</p><p style="margin-left: 40px;"><i>cephalotes </i>(Ratzeburg, 1848, <i>Opius</i>) preocc.</p><p style="margin-left: 40px;"><i>magdalini </i>(Förster, 1863, <i>Laccophrys</i>)</p><p style="margin-left: 40px;"><i>hungaricus </i>Kiss, 1927</p>							England, Ireland
40784	Animalia		Arthropoda			Insecta			Hymenoptera			Ichneumonoidea	Braconidae	Cenocoeliinae			Lestricus						Reinhard, 1865
40785	Animalia		Arthropoda			Insecta			Hymenoptera			Ichneumonoidea	Braconidae	Cenocoeliinae			Lestricus		secalis				(Linnaeus, 1758)	<p style="margin-left: 40px;"><i>Ichneumon secalis </i>Linnaeus, 1758</p><p style="margin-left: 40px;"><i>agricolator </i>(Linnaeus, 1767, <i>Ichneumon</i>)</p><p style="margin-left: 40px;"><i>rubriceps </i>(Ratzeburg, 1844, <i>Alysia</i>)</p><p style="margin-left: 40px;"><i>femorator </i>(Tobias, 1973, <i>Cenocoelius</i>)</p>							Scotland		NMS, det. Shaw, added here; removed from the British list by Shaw (1999) but recently found in Scotland.
40786	Animalia		Arthropoda			Insecta			Hymenoptera			Ichneumonoidea	Braconidae	Charmontinae									van Achterberg, 1979
40787	Animalia		Arthropoda			Insecta			Hymenoptera			Ichneumonoidea	Braconidae	Charmontinae			Charmon						Haliday, 1833	<p style="margin-left: 40px;"><i>PROVANCHERIA </i>Ashmead, 1900</p><p style="margin-left: 40px;"><i>CYCLOCORMUS </i>Cameron, 1911</p><p style="margin-left: 40px;"><i>EUBADIZON </i>misident.</p>
40788	Animalia		Arthropoda			Insecta			Hymenoptera			Ichneumonoidea	Braconidae	Charmontinae			Charmon		cruentatus				Haliday, 1833	<p style="margin-left: 40px;"><i>pectoralis </i>(Nees, 1834, <i>Eubadizon</i>)</p><p style="margin-left: 40px;"><i>pleuralis </i>(Cresson, 1872, <i>Eubadizon</i>)</p><p style="margin-left: 40px;"><i>luteus </i>(Cameron, 1911, <i>Cyclocormus</i>)</p><p style="margin-left: 40px;"><i>?brevicauda </i>(Hellén, 1958, <i>Eubadizon</i>)</p>							England, Scotland, Wales, Ireland, Isle of Man		Although van Achterberg (1979) treated brevicauda as a ‘form’ of cruentatus, the possibility of a separate species requires investigation.
40789	Animalia		Arthropoda			Insecta			Hymenoptera			Ichneumonoidea	Braconidae	Charmontinae			Charmon		extensor				(Linnaeus, 1758)	<p style="margin-left: 40px;"><i>Ichneumon extensor </i>Linnaeus, 1758</p><p style="margin-left: 40px;"><i>gracilis </i>(Provancher, 1880, <i>Eubadizon</i>)</p><p style="margin-left: 40px;"><i>hungaricus </i>(Kiss, 1927, <i>Calyptus</i>)</p><p style="margin-left: 40px;"><i>striatus </i>(Shestakov, 1940, <i>Eubadizon</i>)</p>							England, Scotland, Ireland
40790	Animalia		Arthropoda			Insecta			Hymenoptera			Ichneumonoidea	Braconidae	Cheloninae									Förster, 1863	<p style="margin-left: 40px;">ADELIINAE Viereck, 1918</p><p style="margin-left: 40px;">ACAELIINAE Viereck, 1918</p><p style="margin-left: 40px;">ACOELIINAE Viereck, 1918</p>									The genus Adelius and related extralimital genera have usually been treated as comprising a separate subfamily, Adeliinae. Recent phylogenetic studies (Belshaw et al., 2000; Belshaw & Quicke, 2002) have placed the adeliines within the Cheloninae, as sister taxon to Phanerotoma.
40791	Animalia		Arthropoda			Insecta			Hymenoptera			Ichneumonoidea	Braconidae	Cheloninae	Chelonini								Förster, 1863
40792	Animalia		Arthropoda			Insecta			Hymenoptera			Ichneumonoidea	Braconidae	Cheloninae	Chelonini		Ascogaster						Wesmael, 1835	<p style="margin-left: 40px;"><i>CASCOGASTER </i>Baker, 1926</p><p style="margin-left: 40px;"><i>LEPTODREPANA </i>Shaw, 1983</p>									Distribution and synonymic data taken from Huddleston (1984). Species of Ascogster excluded from the British and Irish list: [bicarinata (Herrich-Schäffer, 1838, Chelonus) mlokossewitschi Kokujev, 1895 rufiventris Telenga, 1941 preocc.] Included by Huddleston (1978) but no British specimens were seen by Huddleston (1984). [similis (Nees, 1816, Chelonus) ] The type is lost and the species is unpla…
40793	Animalia		Arthropoda			Insecta			Hymenoptera			Ichneumonoidea	Braconidae	Cheloninae	Chelonini		Ascogaster		abdominator				(Dahlbom, 1833)	<p style="margin-left: 40px;"><i>Chelonus abdominator </i>Dahlbom, 1833</p><p style="margin-left: 40px;"><i>instabilis </i>Wesmael, 1835</p><p style="margin-left: 40px;"><i>fulviventris </i>Curtis, 1837</p><p style="margin-left: 40px;"><i>femoralis </i>(Herrich-Schäffer, 1838, <i>Chelonus</i>)</p><p style="margin-left: 40px;"><i>rufiventris </i>(Herrich-Schäffer, 1838, <i>Chelonus</i>)</p><p styl…							England, Scotland, Ireland
40794	Animalia		Arthropoda			Insecta			Hymenoptera			Ichneumonoidea	Braconidae	Cheloninae	Chelonini		Ascogaster		albitarsus				Reinhard, 1867	<p style="margin-left: 40px;"><i>similis </i>(Herrich-Schäffer, 1838, <i>Chelonus</i>)</p><p style="margin-left: 40px;"><i>leptopus </i>Thomson, 1874</p>							Scotland, Ireland		added by Huddleston (1984)
40795	Animalia		Arthropoda			Insecta			Hymenoptera			Ichneumonoidea	Braconidae	Cheloninae	Chelonini		Ascogaster		annularis				(Nees, 1816)	<p style="margin-left: 40px;"><i>Sigalphus annularis </i>Nees, 1816</p>							England
40796	Animalia		Arthropoda			Insecta			Hymenoptera			Ichneumonoidea	Braconidae	Cheloninae	Chelonini		Ascogaster		armata				Wesmael, 1835	<p style="margin-left: 40px;"><i>pulchella </i>(Curtis, 1829, <i>Chelonus</i>) nom. nud.</p><p style="margin-left: 40px;"><i>esenbeckii </i>Curtis, 1837</p><p style="margin-left: 40px;"><i>luteicornis </i>(Herrich-Schäffer, 1838, <i>Chelonus</i>)</p>							England, Wales
40797	Animalia		Arthropoda			Insecta			Hymenoptera			Ichneumonoidea	Braconidae	Cheloninae	Chelonini		Ascogaster		bidentula				Wesmael, 1835	<p style="margin-left: 40px;"><i>scabriuscula </i>(Zetterstedt, 1838, <i>Sigalphus</i>)</p><p style="margin-left: 40px;"><i>multiarticulata </i>(Ratzeburg, 1852, <i>Chelonus</i>)</p><p style="margin-left: 40px;"><i>gibbiscuta </i>Thomson, 1874</p><p style="margin-left: 40px;"><i>fuscipennis </i>Thomson, 1892</p><p style="margin-left: 40px;"><i>atamiensis </i>Ashmead, 1906</p>							England, Scotland, Wales, Ireland		added by Huddleston (1984)
40798	Animalia		Arthropoda			Insecta			Hymenoptera			Ichneumonoidea	Braconidae	Cheloninae	Chelonini		Ascogaster		brevicornis				Wesmael, 1835	<p style="margin-left: 40px;"><i>monilicornis </i>(Herrich-Schäffer, 1838, <i>Chelonus</i>)</p>							England, Ireland		added by Huddleston (1984)
40799	Animalia		Arthropoda			Insecta			Hymenoptera			Ichneumonoidea	Braconidae	Cheloninae	Chelonini		Ascogaster		canifrons				Wesmael, 1835	<p style="margin-left: 40px;"><i>graniger </i>Thomson, 1892</p><p style="margin-left: 40px;"><i>zernyana </i>Fahringer, 1925</p>							England, Ireland
40800	Animalia		Arthropoda			Insecta			Hymenoptera			Ichneumonoidea	Braconidae	Cheloninae	Chelonini		Ascogaster		consobrina				Curtis, 1837								England, Scotland, Ireland
40801	Animalia		Arthropoda			Insecta			Hymenoptera			Ichneumonoidea	Braconidae	Cheloninae	Chelonini		Ascogaster		dentifer				Tobias, 1976								England		added by Huddleston (1984)
40802	Animalia		Arthropoda			Insecta			Hymenoptera			Ichneumonoidea	Braconidae	Cheloninae	Chelonini		Ascogaster		dispar				Fahringer, 1934	<p style="margin-left: 40px;"><i>spinifer </i>Tobias, 1964</p><p style="margin-left: 40px;"><i>kozlovi </i>Tobias, 1972</p>							England		added by Huddleston (1984)
40803	Animalia		Arthropoda			Insecta			Hymenoptera			Ichneumonoidea	Braconidae	Cheloninae	Chelonini		Ascogaster		gonocephala				Wesmael, 1835								England		added by Huddleston (1984)
40804	Animalia		Arthropoda			Insecta			Hymenoptera			Ichneumonoidea	Braconidae	Cheloninae	Chelonini		Ascogaster		grahami				Huddleston, 1984								England		added by Huddleston (1984)
40805	Animalia		Arthropoda			Insecta			Hymenoptera			Ichneumonoidea	Braconidae	Cheloninae	Chelonini		Ascogaster		klugii				(Nees, 1816)	<p style="margin-left: 40px;"><i>Sigalphus klugii </i>Nees, 1816</p><p style="margin-left: 40px;"><i>ruficeps </i>Wesmael, 1835</p><p style="margin-left: 40px;"><i>neesii </i>Reinhard, 1867</p>							England		added by Huddleston (1984)
40806	Animalia		Arthropoda			Insecta			Hymenoptera			Ichneumonoidea	Braconidae	Cheloninae	Chelonini		Ascogaster		quadridentata				Wesmael, 1835	<p style="margin-left: 40px;"><i>pallidicornis </i>Curtis, 1837</p><p style="margin-left: 40px;"><i>impressa </i>(Herrich-Schäffer, 1838, <i>Chelonus</i>)</p><p style="margin-left: 40px;"><i>quadridens </i>(Herrich-Schäffer, 1838, <i>Chelonus</i>)</p><p style="margin-left: 40px;"><i>cynipum </i>Thomson, 1892</p><p style="margin-left: 40px;"><i>nigricornis </i>Thomson, 1892</p><p style="margin-lef…							England
40807	Animalia		Arthropoda			Insecta			Hymenoptera			Ichneumonoidea	Braconidae	Cheloninae	Chelonini		Ascogaster		rufidens				Wesmael, 1835	<p style="margin-left: 40px;"><i>rufipes </i>(Herrich-Schäffer, 1838, <i>Chelonus</i>) preocc.</p><p style="margin-left: 40px;"><i>laevigator </i>(Ratzeburg, 1852, <i>Chelonus</i>)</p>							England, Ireland
40808	Animalia		Arthropoda			Insecta			Hymenoptera			Ichneumonoidea	Braconidae	Cheloninae	Chelonini		Ascogaster		rufipes				(Latreille, 1809)	<p style="margin-left: 40px;"><i>Sigalphus rufipes </i>Latreille, 1809</p><p style="margin-left: 40px;"><i>elegans </i>(Nees, 1816, <i>Sigalphus</i>)</p><p style="margin-left: 40px;"><i>fasciata </i>(Dahlbom, 1833, <i>Chelonus</i>)</p><p style="margin-left: 40px;"><i>pallipes </i>(Herrich-Schäffer, 1838, <i>Chelonus</i>)</p><p style="margin-left: 40px;"><i>rubripes </i>(Lucas, 1849, <i>Chelonus</…							England, Ireland
40809	Animalia		Arthropoda			Insecta			Hymenoptera			Ichneumonoidea	Braconidae	Cheloninae	Chelonini		Ascogaster		varipes				Wesmael, 1835	<p style="margin-left: 40px;"><i>atriceps </i>(Ratzeburg, 1844, <i>Chelonus</i>)</p><p style="margin-left: 40px;"><i>tersa </i>Reinhard, 1867</p><p style="margin-left: 40px;"><i>cavifrons </i>Thomson, 1874</p><p style="margin-left: 40px;"><i>sternalis </i>Thomson, 1874</p><p style="margin-left: 40px;"><i>catula </i>(Marshall, 1885, <i>Chelonus</i>)</p><p style="margin-left: 40px;"><i>jaroslawensi…							England, Scotland, Ireland
40810	Animalia		Arthropoda			Insecta			Hymenoptera			Ichneumonoidea	Braconidae	Cheloninae	Chelonini		Chelonus						Jurine, 1801
40811	Animalia		Arthropoda			Insecta			Hymenoptera			Ichneumonoidea	Braconidae	Cheloninae	Chelonini		Chelonus	Chelonus					Jurine, 1801	<p style="margin-left: 40px;"><i>Anomala </i>von Block, 1799 nom. ob.</p><p style="margin-left: 40px;"><i>DAVISANIA </i>La Munyon, 1877</p><p style="margin-left: 40px;"><i>ARICHELONUS </i>Viereck, 1913</p><p style="margin-left: 40px;"><i>MEGACHELONUS </i>Baker, 1926</p>
40812	Animalia		Arthropoda			Insecta			Hymenoptera			Ichneumonoidea	Braconidae	Cheloninae	Chelonini		Chelonus	Chelonus	acuminatus				Herrich-Schäffer, 1838								England		NMS, det. Huddleston, added here
40813	Animalia		Arthropoda			Insecta			Hymenoptera			Ichneumonoidea	Braconidae	Cheloninae	Chelonini		Chelonus	Chelonus	annulatus				(Nees, 1816)	<p style="margin-left: 40px;"><i>Sigalphus annulatus </i>Nees, 1816</p><p style="margin-left: 40px;"><i>maculatus </i>Szépligeti, 1896</p>							England, Scotland, Ireland
40814	Animalia		Arthropoda			Insecta			Hymenoptera			Ichneumonoidea	Braconidae	Cheloninae	Chelonini		Chelonus	Chelonus	asiaticus				Telenga, 1941								England, Ireland		NHM, det. Lozan, added here. The name is a junior homonym of Chelonus asiaticus Fahringer, 1932.
40815	Animalia		Arthropoda			Insecta			Hymenoptera			Ichneumonoidea	Braconidae	Cheloninae	Chelonini		Chelonus	Chelonus	canescens				Wesmael, 1835								England
40816	Animalia		Arthropoda			Insecta			Hymenoptera			Ichneumonoidea	Braconidae	Cheloninae	Chelonini		Chelonus	Chelonus	carbonator				Marshall, 1885	<p style="margin-left: 40px;"><i>asiaticus </i>Fahringer, 1932</p>							England
40817	Animalia		Arthropoda			Insecta			Hymenoptera			Ichneumonoidea	Braconidae	Cheloninae	Chelonini		Chelonus	Chelonus	corvulus				Marshall, 1885	<p style="margin-left: 40px;"><i>suturatus </i>Szépligeti, 1898</p>							England, Scotland
40818	Animalia		Arthropoda			Insecta			Hymenoptera			Ichneumonoidea	Braconidae	Cheloninae	Chelonini		Chelonus	Chelonus	cylindrus				(Klug, 1816)	<p style="margin-left: 40px;"><i>Sigalphus cylindrus </i>Klug, 1816</p><p style="margin-left: 40px;"><i>variabilis </i>Herrich-Schäffer, 1838</p><p style="margin-left: 40px;"><i>macrocerus </i>Thomson, 1874</p><p style="margin-left: 40px;"><i>speculator </i>Marshall, 1885</p><p style="margin-left: 40px;"><i>ebeninus </i>Fahringer, 1934</p>							England		Chelonus speculator was listed as a synonym of oculator by Huddleston (1978).
40819	Animalia		Arthropoda			Insecta			Hymenoptera			Ichneumonoidea	Braconidae	Cheloninae	Chelonini		Chelonus	Chelonus	decorus				Marshall, 1885	<p style="margin-left: 40px;"><i>clavipes </i>Curtis, 1837 nom. nud.</p><p style="margin-left: 40px;"><i>clavipes </i>Fahringer, 1934</p><p style="margin-left: 40px;"><i>szepligetii </i>Fahringer, 1934</p>							England
40820	Animalia		Arthropoda			Insecta			Hymenoptera			Ichneumonoidea	Braconidae	Cheloninae	Chelonini		Chelonus	Chelonus	inanitus				(Linnaeus, 1767)	<p style="margin-left: 40px;"><i>Cynips inanita </i>Linnaeus, 1767</p><p style="margin-left: 40px;"><i>binarius </i>(Fourcroy, 1785, <i>Ichneumon</i>)</p><p style="margin-left: 40px;"><i>atomos </i>(Rossi, 1790, <i>Ichneumon</i>)</p>							England, Ireland
40821	Animalia		Arthropoda			Insecta			Hymenoptera			Ichneumonoidea	Braconidae	Cheloninae	Chelonini		Chelonus	Chelonus	obscuratus				Herrich-Schäffer, 1838	<p style="margin-left: 40px;"><i>intermedius </i>Thomson, 1874</p>							England		NMS, det. Huddleston, added here
40822	Animalia		Arthropoda			Insecta			Hymenoptera			Ichneumonoidea	Braconidae	Cheloninae	Chelonini		Chelonus	Chelonus	oculator				(Fabricius, 1785)	<p style="margin-left: 40px;"><i>Ichneumon oculator </i>Fabricius, 1785</p><p style="margin-left: 40px;"><i>integer </i>(von Block, 1799, <i>Anomala</i>)</p><p style="margin-left: 40px;"><i>mutabilis </i>(Nees, 1816, <i>Sigalphus</i>)</p><p style="margin-left: 40px;"><i>oculatus </i>(Nees, 1816, <i>Sigalphus</i>)</p>							England, Scotland
40823	Animalia		Arthropoda			Insecta			Hymenoptera			Ichneumonoidea	Braconidae	Cheloninae	Chelonini		Chelonus	Chelonus	pusio				Marshall, 1885								England
40824	Animalia		Arthropoda			Insecta			Hymenoptera			Ichneumonoidea	Braconidae	Cheloninae	Chelonini		Chelonus	Chelonus	scabrator				(Fabricius, 1793)	<p style="margin-left: 40px;"><i>Ichneumon scabrator </i>Fabricius, 1793</p><p style="margin-left: 40px;"><i>scaber </i>(Nees, 1816, <i>Sigalphus</i>)</p><p style="margin-left: 40px;"><i>buccatus </i>Thomson, 1874</p>							England
40825	Animalia		Arthropoda			Insecta			Hymenoptera			Ichneumonoidea	Braconidae	Cheloninae	Chelonini		Chelonus	Chelonus	submuticus				Wesmael, 1835	<p style="margin-left: 40px;"><i>luteipes </i>Thomson, 1874</p>							England
40826	Animalia		Arthropoda			Insecta			Hymenoptera			Ichneumonoidea	Braconidae	Cheloninae	Chelonini		Chelonus	Chelonus	wesmaelii				Curtis, 1837	<p style="margin-left: 40px;"><i>zimini </i>Tobias, 1972</p>							England
40827	Animalia		Arthropoda			Insecta			Hymenoptera			Ichneumonoidea	Braconidae	Cheloninae	Chelonini		Chelonus	Microchelonus					Szépligeti, 1908	<p style="margin-left: 40px;"><i>CHELONELLA </i>Szépligeti, 1908</p><p style="margin-left: 40px;"><i>NEOCHELONELLA </i>Hincks, 1943</p>									Treated as a valid genus by Papp (1996b) and Belokobylskij et al. (2003), sometimes treated as a straight synonym of Chelonus (van Achterberg &amp; Polaszek, 1996; van Achterberg, 2004b), here treated as a subgenus of Chelonus, following Taxapad (Yu et al., 2012).
40828	Animalia		Arthropoda			Insecta			Hymenoptera			Ichneumonoidea	Braconidae	Cheloninae	Chelonini		Chelonus	Microchelonus	atripes				Thomson, 1874	<p style="margin-left: 40px;"><i>cunctator </i>(Papp, 1971, <i>Microchelonus</i>)</p><p style="margin-left: 40px;"><i>kamtshaticus </i>(Tobias, 1986, <i>Microchelonus</i>)</p>							England		NMS, NHM, det. Huddleston and Lozan, added here
40829	Animalia		Arthropoda			Insecta			Hymenoptera			Ichneumonoidea	Braconidae	Cheloninae	Chelonini		Chelonus	Microchelonus	basalis				Curtis, 1837								England, Scotland
40830	Animalia		Arthropoda			Insecta			Hymenoptera			Ichneumonoidea	Braconidae	Cheloninae	Chelonini		Chelonus	Microchelonus	binus				(Tobias, 1995)	<p style="margin-left: 40px;"><i>Microchelonus binus </i>Tobias, 1995</p>							England		NHM, det. Lozan, added here
40831	Animalia		Arthropoda			Insecta			Hymenoptera			Ichneumonoidea	Braconidae	Cheloninae	Chelonini		Chelonus	Microchelonus	contractus				(Nees, 1816)	<p style="margin-left: 40px;"><i>Sigalphus contractus </i>Nees, 1816</p><p style="margin-left: 40px;"><i>compressiscapus </i>Szépligeti, 1898</p>							England, Scotland, Wales, Ireland		some distribution data from Tobias &amp; Shaw (2005)
40832	Animalia		Arthropoda			Insecta			Hymenoptera			Ichneumonoidea	Braconidae	Cheloninae	Chelonini		Chelonus	Microchelonus	depressus				Thomson, 1874								England, Scotland, Wales		NMS, NHM, det. Huddleston and Lozan, added here
40833	Animalia		Arthropoda			Insecta			Hymenoptera			Ichneumonoidea	Braconidae	Cheloninae	Chelonini		Chelonus	Microchelonus	exilis				Marshall, 1885	<p style="margin-left: 40px;"><i>excavatus </i>Tobias, 1972</p>							England
40834	Animalia		Arthropoda			Insecta			Hymenoptera			Ichneumonoidea	Braconidae	Cheloninae	Chelonini		Chelonus	Microchelonus	fenestratus				(Nees, 1816)	<p style="margin-left: 40px;"><i>Sigalphus fenestratus </i>Nees, 1816</p><p style="margin-left: 40px;"><i>dispar </i>Marshall, 1885</p><p style="margin-left: 40px;"><i>bimaculatus </i>Ivanov, 1899 preocc.</p>							England		Synonymised under contractus by Papp (1995a) but treated as a separate species by Tobias &amp; Lozan (2003) and listed as such in Taxapad (Yu et al., 2012).
40835	Animalia		Arthropoda			Insecta			Hymenoptera			Ichneumonoidea	Braconidae	Cheloninae	Chelonini		Chelonus	Microchelonus	fumipennis				(Tobias, 1986)	<p style="margin-left: 40px;"><i>Microchelonus fumipennis </i>Tobias, 1986</p>									NHM, det. Lozan, added here; specimen lacking locality data, Billups coll.
40836	Animalia		Arthropoda			Insecta			Hymenoptera			Ichneumonoidea	Braconidae	Cheloninae	Chelonini		Chelonus	Microchelonus	latrunculus				Marshall, 1885	<p style="margin-left: 40px;"><i>?parcicornis </i>Herrich-Schäffer, 1838</p><p style="margin-left: 40px;"><i>thomsonii </i>Dalla Torre, 1898</p><p style="margin-left: 40px;"><i>polonicus </i>Fahringer, 1934</p><p style="margin-left: 40px;"><i>rectus </i>(Papp, 1971, <i>Microchelonus</i>)</p>							England, Scotland		Although parcicornis would have priority, Papp (1995a) states that the type is lost and its identity unverifiable.
40837	Animalia		Arthropoda			Insecta			Hymenoptera			Ichneumonoidea	Braconidae	Cheloninae	Chelonini		Chelonus	Microchelonus	lugubris				Wesmael, 1835								England, Ireland		NMS, NHM, det. Huddleston and Lozan, added here
40838	Animalia		Arthropoda			Insecta			Hymenoptera			Ichneumonoidea	Braconidae	Cheloninae	Chelonini		Chelonus	Microchelonus	microphtalmus				Wesmael, 1838	<p style="margin-left: 40px;"><i>dilatus </i>Papp, 1971</p>							England		NMS, det. Huddleston, added here
40839	Animalia		Arthropoda			Insecta			Hymenoptera			Ichneumonoidea	Braconidae	Cheloninae	Chelonini		Chelonus	Microchelonus	miscellae				(Tobias &amp; Shaw, 2005)	<p style="margin-left: 40px;"><i>Microchelonus miscellae </i>Tobias &amp; Shaw, 2005</p>							England		added by Tobias &amp; Shaw (2005)
40840	Animalia		Arthropoda			Insecta			Hymenoptera			Ichneumonoidea	Braconidae	Cheloninae	Chelonini		Chelonus	Microchelonus	retusus				(Nees, 1816)	<p style="margin-left: 40px;"><i>Sigalphus retusus </i>Nees, 1816</p><p style="margin-left: 40px;"><i>emarginatus </i>Herrich-Schäffer, 1838</p><p style="margin-left: 40px;"><i>subemarginatus </i>Herrich-Schäffer, 1838</p><p style="margin-left: 40px;"><i>caudatus </i>Thomson, 1874</p><p style="margin-left: 40px;"><i>pamiricus </i>Vojnovskaja-Krieger, 1931</p>							England		NHM, det. Lozan, added here
40841	Animalia		Arthropoda			Insecta			Hymenoptera			Ichneumonoidea	Braconidae	Cheloninae	Chelonini		Chelonus	Microchelonus	risorius				Reinhard, 1867	<p style="margin-left: 40px;"><i>fissus </i>Szépligeti, 1900 preocc.</p><p style="margin-left: 40px;"><i>fissuralis </i>(Tobias, 1964, <i>Neochelonella</i>)</p><p style="margin-left: 40px;"><i>magnifissus </i>(Tobias, 1986, <i>Microchelonus</i>)</p>							England
40842	Animalia		Arthropoda			Insecta			Hymenoptera			Ichneumonoidea	Braconidae	Cheloninae	Chelonini		Chelonus	Microchelonus	sulcatus				Jurine, 1807								England
40843	Animalia		Arthropoda			Insecta			Hymenoptera			Ichneumonoidea	Braconidae	Cheloninae	Chelonini		Chelonus	Parachelonus					Tobias, 1995
40844	Animalia		Arthropoda			Insecta			Hymenoptera			Ichneumonoidea	Braconidae	Cheloninae	Chelonini		Chelonus	Parachelonus	gravenhorstii				(Nees, 1816)	<p style="margin-left: 40px;"><i>Sigalphus gravenhorstii </i>Nees, 1816</p><p style="margin-left: 40px;"><i>maculator </i>Dahlbom, 1833</p><p style="margin-left: 40px;"><i>eurytheca </i>Wesmael, 1838</p><p style="margin-left: 40px;"><i>adjaricus </i>Tobias, 1976</p><p style="margin-left: 40px;"><i>tricolor </i>Tobias, 1976</p>							England
40845	Animalia		Arthropoda			Insecta			Hymenoptera			Ichneumonoidea	Braconidae	Cheloninae	Chelonini		Chelonus	Parachelonus	pellucens				(Nees, 1816)	<p style="margin-left: 40px;"><i>Sigalphus pellucens </i>Nees, 1816</p><p style="margin-left: 40px;"><i>nitens </i>Reinhard, 1867</p><p style="margin-left: 40px;"><i>alboannulatus </i>Szépligeti, 1896</p><p style="margin-left: 40px;"><i>pulchricornis </i>Szépligeti, 1898</p><p style="margin-left: 40px;"><i>varimaculatus </i>Tobias, 1986</p><p style="margin-left: 40px;"><i>austriacus </i>Fahringer…							England		added by Papp (2004b)
40846	Animalia		Arthropoda			Insecta			Hymenoptera			Ichneumonoidea	Braconidae	Cheloninae	Chelonini		Chelonus	Stylochelonus					Hellén, 1958
40847	Animalia		Arthropoda			Insecta			Hymenoptera			Ichneumonoidea	Braconidae	Cheloninae	Chelonini		Chelonus	Stylochelonus	pedator				Dahlbom, 1833	<p style="margin-left: 40px;"><i>secutor </i>(Marshall, 1885, <i>Chelonus</i>)</p>							England, Scotland
40848	Animalia		Arthropoda			Insecta			Hymenoptera			Ichneumonoidea	Braconidae	Cheloninae	Chelonini		Chelonus	Stylochelonus	pusillus				(Szépligeti, 1908)	<p style="margin-left: 40px;"><i>Stylochelonus pusillus </i>Szépligeti, 1908</p><p style="margin-left: 40px;"><i>furtivus </i>(Tobias, 1986, <i>Microchelonus</i>)</p><p style="margin-left: 40px;"><i>tuberculiventris </i>(Tobias, 1986, <i>Microchelonus</i>)</p>							England		NHM, det. Lozan, added here
40849	Animalia		Arthropoda			Insecta			Hymenoptera			Ichneumonoidea	Braconidae	Cheloninae	Phanerotomini								Baker, 1926
40850	Animalia		Arthropoda			Insecta			Hymenoptera			Ichneumonoidea	Braconidae	Cheloninae	Phanerotomini		Adelius						Haliday, 1833	<p style="margin-left: 40px;"><i>ACAELIUS </i>Haliday, 1834</p><p style="margin-left: 40px;"><i>ACOELIUS </i>Haliday, 1835</p><p style="margin-left: 40px;"><i>PLEIOMERUS </i>Wesmael, 1837</p><p style="margin-left: 40px;"><i>ANOMOPTERUS </i>Rohwer, 1914</p><p style="margin-left: 40px;"><i>MYRIOLA </i>Shestakov, 1932</p>
40851	Animalia		Arthropoda			Insecta			Hymenoptera			Ichneumonoidea	Braconidae	Cheloninae	Phanerotomini		Adelius		erythronotus				(Förster, 1851)	<p style="margin-left: 40px;"><i>Acoelius erythronotus </i>Förster, 1851</p><p style="margin-left: 40px;"><i>pyrrhia </i>(Beirne, 1945, <i>Acoelius</i>)</p><p style="margin-left: 40px;"><i>flavus </i>(Tobias, 1966, <i>Acoelius</i>)</p>							England, Ireland		Adelius pyrrhia was listed as a valid species by O’Connor et al. (1999) but as a synonym of erythronotus by Belokobylskij et al. (2003).
40852	Animalia		Arthropoda			Insecta			Hymenoptera			Ichneumonoidea	Braconidae	Cheloninae	Phanerotomini		Adelius		germanus				(Haliday, 1834)	<p style="margin-left: 40px;"><i>Acaelius germanus </i>Haliday, 1834</p>							England, Ireland
40853	Animalia		Arthropoda			Insecta			Hymenoptera			Ichneumonoidea	Braconidae	Cheloninae	Phanerotomini		Adelius		subfasciatus				Haliday, 1833	<p style="margin-left: 40px;"><i>minutissimus </i>(Zetterstedt, 1840, <i>Bracon</i>)</p><p style="margin-left: 40px;"><i>parvulus </i>(Förster, 1851, <i>Acoelius</i>)</p>							England, Wales, Ireland		some distribution data from Shaw &amp; Askew (1976)
40854	Animalia		Arthropoda			Insecta			Hymenoptera			Ichneumonoidea	Braconidae	Cheloninae	Phanerotomini		Adelius		viator				(Förster, 1851)	<p style="margin-left: 40px;"><i>Acoelius viator </i>Förster, 1851</p>							England
40855	Animalia		Arthropoda			Insecta			Hymenoptera			Ichneumonoidea	Braconidae	Cheloninae	Phanerotomini		Phanerotoma						Wesmael, 1838
40856	Animalia		Arthropoda			Insecta			Hymenoptera			Ichneumonoidea	Braconidae	Cheloninae	Phanerotomini		Phanerotoma	Phanerotoma					Wesmael, 1838	<p style="margin-left: 40px;"><i>PHANEROGASTER </i>Wesmael, 1838 unavailable</p><p style="margin-left: 40px;"><i>SULYDUS </i>Du Buysson, 1897</p><p style="margin-left: 40px;"><i>ICHNEUTIPTERUS </i>Vachal, 1907</p><p style="margin-left: 40px;"><i>NEOPHANEROTOMA </i>Szépligeti, 1908</p><p style="margin-left: 40px;"><i>NEOACAMPSIS </i>Szépligeti, 1914</p><p style="margin-left: 40px;"><i>PHANEROTOMIN…									species of Phanerotoma (Phanerotoma) excluded from the British and Irish list [planifrons (Nees, 1816, Sigalphus) blanda Fahringer, 1934 bicolor Snoflák, 1958 preocc. asini Llopis Minguez, 1968 snoflaki Shenefelt, 1973] Prior to van Achterberg’s (1990) revision, dentata had frequently been misidentified as planifrons. All of the British specimens identified as planifrons in the NHM are in fact de…
40857	Animalia		Arthropoda			Insecta			Hymenoptera			Ichneumonoidea	Braconidae	Cheloninae	Phanerotomini		Phanerotoma	Phanerotoma	acuminata				Szépligeti, 1908								England		added by van Achterberg (1990)
40858	Animalia		Arthropoda			Insecta			Hymenoptera			Ichneumonoidea	Braconidae	Cheloninae	Phanerotomini		Phanerotoma	Phanerotoma	dentata				(Panzer, 1805)	<p style="margin-left: 40px;"><i>Chelonus dentatus </i>Panzer, 1805</p><p style="margin-left: 40px;"><i>dentator </i>(Nees, 1816, <i>Sigalphus</i>)</p><p style="margin-left: 40px;"><i>rendilea </i>Fahringer, 1934</p><p style="margin-left: 40px;"><i>minor </i>Šnoflák, 1951</p>							England		Huddleston (1978) listed Sigalphus rufescens Latreille, 1809 as a junior synonym of dentata but this is now considered to be a separate species, not occurring in Britain or Ireland (van Achterberg, 1990), with historical records being misidentifications.
40859	Animalia		Arthropoda			Insecta			Hymenoptera			Ichneumonoidea	Braconidae	Cheloninae	Phanerotomini		Phanerotoma	Phanerotoma	leucobasis				Kriechbaumer, 1894	<p style="margin-left: 40px;"><i>ocularis </i>Kohl, 1906</p><p style="margin-left: 40px;"><i>ornatulopsis </i>de Saeger, 1942</p><p style="margin-left: 40px;"><i>desertorum </i>Hedwig, 1957</p><p style="margin-left: 40px;"><i>flavitestacea </i>Fischer, 1939</p><p style="margin-left: 40px;"><i>caboverdensis </i>Hedqvist,1965</p>							England		added by van Achterberg (1990). Phanerotoma rjabovi Vojnovskaja-Krieger, 1929 and media Shestakov, 1930, synonymised under leucobasis by van Achterberg (1990), are now considered to be junior synonyms of fracta Kokujev, 1903 (Belokobylskij, 2000a).
40860	Animalia		Arthropoda			Insecta			Hymenoptera			Ichneumonoidea	Braconidae	Cheloninae	Phanerotomini		Phanerotoma	Bracotritoma					Csiki, 1909	<p style="margin-left: 40px;"><i>TRITOMA </i>Szépligeti, 1908 preocc.</p><p style="margin-left: 40px;"><i>SZEPLIGETIA </i>Schulz, 1911</p><p style="margin-left: 40px;"><i>TRITOMIOS </i>Strand, 1921</p><p style="margin-left: 40px;"><i>UNICA </i>Šnoflák, 1951</p>
40861	Animalia		Arthropoda			Insecta			Hymenoptera			Ichneumonoidea	Braconidae	Cheloninae	Phanerotomini		Phanerotoma	Bracotritoma	bilinea				Lyle, 1924	<p style="margin-left: 40px;"><i>gregori </i>Šnoflák, 1951</p>							England
40862	Animalia		Arthropoda			Insecta			Hymenoptera			Ichneumonoidea	Braconidae	Cheloninae	Phanerotomini		Phanerotoma	Bracotritoma	tritoma				(Marshall, 1898)	<p style="margin-left: 40px;"><i>Chelonus tritomus </i>Marshall, 1898</p><p style="margin-left: 40px;"><i>antennalis </i>Šnoflák, 1951</p>							England, Wales, Ireland
40863	Animalia		Arthropoda			Insecta			Hymenoptera			Ichneumonoidea	Braconidae	Doryctinae									Förster, 1863										Tribal classification follows Belokobylskij (1992), but note that recent work suggests that none of the major doryctine tribes are actually monophyletic .(Belokobylskij et al., 2004). Generic synonyms for the most part follow Belokobylskij et al. (2004)
40864	Animalia		Arthropoda			Insecta			Hymenoptera			Ichneumonoidea	Braconidae	Doryctinae	Doryctini								Förster, 1863
40865	Animalia		Arthropoda			Insecta			Hymenoptera			Ichneumonoidea	Braconidae	Doryctinae	Doryctini		Dendrosoter						Wesmael, 1838	<p style="margin-left: 40px;"><i>EURYBOLUS </i>Ratzeburg, 1848</p><p style="margin-left: 40px;"><i>CAENOPACHYS </i>Förster , 1863</p>									Although Mancini et al. (2003) argued that Caenopachys should be treated as a separate genus, Gebiola et al. (2015) presented molecular phylogenetic evidence that that ‘Caenopachys’ species (including hartigii in Britain) are nested within Dendrosoter.
40866	Animalia		Arthropoda			Insecta			Hymenoptera			Ichneumonoidea	Braconidae	Doryctinae	Doryctini		Dendrosoter		hartigii				(Ratzeburg, 1848)	<p style="margin-left: 40px;"><i>Bracon hartigii </i>Ratzeburg, 1848</p><p style="margin-left: 40px;"><i>flaviventris </i>Förster, 1878</p><p style="margin-left: 40px;"><i>caenopachoides </i>Ruschka, 1925</p><p style="margin-left: 40px;"><i>hartigi </i> misspelling</p>							England
40867	Animalia		Arthropoda			Insecta			Hymenoptera			Ichneumonoidea	Braconidae	Doryctinae	Doryctini		Dendrosoter		middendorffi				(Ratzeburg, 1848)	<p style="margin-left: 40px;"><i>Bracon middendorffi </i>Ratzeburg, 1848</p><p style="margin-left: 40px;"><i>schimitscheki </i>Fahringer, 1941</p>							England		NMS, det. Shaw, added in Fauna Europaea
40868	Animalia		Arthropoda			Insecta			Hymenoptera			Ichneumonoidea	Braconidae	Doryctinae	Doryctini		Dendrosoter		protuberans				(Nees, 1834)	<p style="margin-left: 40px;"><i>Bracon protuberans </i>Nees, 1834</p><p style="margin-left: 40px;"><i>insignis </i>Förster, 1878</p>							England
40869	Animalia		Arthropoda			Insecta			Hymenoptera			Ichneumonoidea	Braconidae	Doryctinae	Doryctini		Doryctes						Haliday, 1836	<p style="margin-left: 40px;"><i>ISCHIOGONUS </i>Wesmael, 1838</p><p style="margin-left: 40px;"><i>Neodoryctes </i>Szépligeti, 1914</p><p style="margin-left: 40px;"><i>UDAMOLCUS </i>Enderlein, 1920</p><p style="margin-left: 40px;"><i>PRISTODORYCTES </i>Kieffer, 1921</p><p style="margin-left: 40px;"><i>Paradoryctes </i>Granger, 1949</p><p style="margin-left: 40px;"><i>PLYCTES </i>Fischer, 1970</p>
40870	Animalia		Arthropoda			Insecta			Hymenoptera			Ichneumonoidea	Braconidae	Doryctinae	Doryctini		Doryctes		heydenii				Reinhard, 1865								England
40871	Animalia		Arthropoda			Insecta			Hymenoptera			Ichneumonoidea	Braconidae	Doryctinae	Doryctini		Doryctes		#leucogaster				(Nees, 1834)	<p style="margin-left: 40px;"><i>Bracon #leucogaster </i>Nees, 1834</p>									Probably occurred only in imported timber. Its British status appears to depend solely on specimens reared in July 1908 from Austrian oak imported to a timber yard near Millwall docks (Elliott &amp; Morley, 1911).
40872	Animalia		Arthropoda			Insecta			Hymenoptera			Ichneumonoidea	Braconidae	Doryctinae	Doryctini		Doryctes		obliteratus				(Nees, 1834)	<p style="margin-left: 40px;"><i>Bracon obliteratus </i>Nees, 1834</p><p style="margin-left: 40px;"><i>mutillator </i> misident.</p><p style="margin-left: 40px;"><i>tabidus </i>(Haliday, 1836, <i>Rogas</i>)</p><p style="margin-left: 40px;"><i>brachyurus </i>Marshall, 1888</p><p style="margin-left: 40px;"><i>strigatus </i>Kokujev, 1900</p><p style="margin-left: 40px;"><i>petrovskii </i>Kokujev, 19…							England		Regarded as a synonym of striatellus by Belokobylskij et al. (2003).
40873	Animalia		Arthropoda			Insecta			Hymenoptera			Ichneumonoidea	Braconidae	Doryctinae	Doryctini		Doryctes		pomarius				Reinhard, 1865	<p style="margin-left: 40px;"><i>schimitscheki </i>Fahringer, 1931</p>							England
40874	Animalia		Arthropoda			Insecta			Hymenoptera			Ichneumonoidea	Braconidae	Doryctinae	Doryctini		Doryctes		rossicus				Telenga, 1941								England		NMS, det. Shaw, added in Fauna Europaea
40875	Animalia		Arthropoda			Insecta			Hymenoptera			Ichneumonoidea	Braconidae	Doryctinae	Doryctini		Doryctes		striatellus				(Nees, 1834)	<p style="margin-left: 40px;"><i>Bracon striatellus </i>Nees, 1834</p><p style="margin-left: 40px;"><i>maculipes </i>Curtis, 1837 nom. nud.</p><p style="margin-left: 40px;"><i>disparator </i>(Ratzeburg, 1844, <i>Bracon</i>)</p><p style="margin-left: 40px;"><i>rex </i>Marshall, 1897</p><p style="margin-left: 40px;"><i>striatelloides </i>Strand, 1918</p><p style="margin-left: 40px;"><i>yogoi </i>Wa…							England
40876	Animalia		Arthropoda			Insecta			Hymenoptera			Ichneumonoidea	Braconidae	Doryctinae	Doryctini		Doryctes		undulatus				(Ratzeburg, 1852)	<p style="margin-left: 40px;"><i>Bracon undulatus </i>Ratzeburg, 1852</p>							England
40877	Animalia		Arthropoda			Insecta			Hymenoptera			Ichneumonoidea	Braconidae	Doryctinae	Doryctini		Gildoria						Hedqvist, 1974										Removed from synonymy with Dendrosotinus Telenga, 1941 by van Achterberg (2003b).
40878	Animalia		Arthropoda			Insecta			Hymenoptera			Ichneumonoidea	Braconidae	Doryctinae	Doryctini		Gildoria		similis				(Bouček, 1955)	<p style="margin-left: 40px;"><i>Dendrosotinus similis </i>Bouček, 1955</p>							England		added by Shaw (1998a)
40879	Animalia		Arthropoda			Insecta			Hymenoptera			Ichneumonoidea	Braconidae	Doryctinae	Doryctini		Ontsira						Cameron, 1900	<p style="margin-left: 40px;"><i>DORYCTODES </i>Hellén, 1927</p>									Zaldivar-Riverón et al. (2008b) did not recover Ontsira as monophyletic and consequently some authors (e.g. van Achterberg, 2014) prefer to treat these species as belonging to Doryctodes.
40880	Animalia		Arthropoda			Insecta			Hymenoptera			Ichneumonoidea	Braconidae	Doryctinae	Doryctini		Ontsira		antica				(Wollaston, 1858)	<p style="margin-left: 40px;"><i>Clinocentrus anticus </i>Wollaston, 1858</p><p style="margin-left: 40px;"><i>gallica </i>(Reinhard, 1865, <i>Doryctes</i>)</p><p style="margin-left: 40px;"><i>truncorum </i>(Goureau, 1866, <i>Bracon</i>)</p><p style="margin-left: 40px;"><i>incerta </i>(Ashmead, 1888, <i>Doryctes</i>)</p><p style="margin-left: 40px;"><i>caudalis </i>(Hellén, 1957, <i>Oncophanes</i>…							Scotland
40881	Animalia		Arthropoda			Insecta			Hymenoptera			Ichneumonoidea	Braconidae	Doryctinae	Doryctini		Ontsira		ignea				(Ratzeburg, 1852)	<p style="margin-left: 40px;"><i>Bracon igneus </i>Ratzeburg, 1852</p>							England		NMS, det. Shaw and van Achterberg, added here
40882	Animalia		Arthropoda			Insecta			Hymenoptera			Ichneumonoidea	Braconidae	Doryctinae	Doryctini		Ontsira		imperator				(Haliday, 1836)	<p style="margin-left: 40px;"><i>Rogas imperator </i>Haliday, 1836</p><p style="margin-left: 40px;"><i>zonata </i>(Wesmael, 1838, <i>Ischiogonus</i>)</p><p style="margin-left: 40px;"><i>praecisa </i>(Ratzeburg, 1852, <i>Bracon</i>)</p><p style="margin-left: 40px;"><i>cingulata </i>(Provancher, 1880, <i>Syngaster</i>)</p><p style="margin-left: 40px;"><i>dubia </i>(Kokujev, 1900, <i>Doryctes</i>)</…							England, Ireland
40883	Animalia		Arthropoda			Insecta			Hymenoptera			Ichneumonoidea	Braconidae	Doryctinae	Doryctini		Rhaconotus						Ruthe, 1854	<p style="margin-left: 40px;"><i>HEDYSOMUS </i>Förster, 1863</p><p style="margin-left: 40px;"><i>HORMIOPTERUS </i>Giraud, 1869</p><p style="margin-left: 40px;"><i>RHADINOGASTER </i>Szépligeti, 1908</p><p style="margin-left: 40px;"><i>EURYPHRYMNUS </i>Cameron, 1910</p><p style="margin-left: 40px;"><i>RHACONOTINUS </i>Hedqvist, 1965</p>
40884	Animalia		Arthropoda			Insecta			Hymenoptera			Ichneumonoidea	Braconidae	Doryctinae	Doryctini		Rhaconotus		aciculatus				Ruthe, 1854	<p style="margin-left: 40px;"><i>cerdai </i>Docavo Alberti, 1960</p><p style="margin-left: 40px;"><i>major </i>Tobias, 1964</p>							England		added by Shaw (1998a)
40885	Animalia		Arthropoda			Insecta			Hymenoptera			Ichneumonoidea	Braconidae	Doryctinae	Doryctini		Wachsmannia						Szépligeti, 1900										Belokobylskij (1992) synonymised Wachsmannia under Ontsira but van Achterberg (1995) disagreed and synonymised Wachsmannia under Hypodoryctes Kokujev, 1900. Van Achterberg (pers. comm. and in Fauna Europaea) now regards Wachsmannia as a separate genus again.
40886	Animalia		Arthropoda			Insecta			Hymenoptera			Ichneumonoidea	Braconidae	Doryctinae	Doryctini		Wachsmannia		spathiiformis				(Ratzeburg, 1848)	<p style="margin-left: 40px;"><i>Bracon spathiiformis </i>Ratzeburg, 1848</p><p style="margin-left: 40px;"><i>maculipennis </i>Szépligeti, 1900</p><p style="margin-left: 40px;"><i>obliteratus </i> misident.</p>							England
40887	Animalia		Arthropoda			Insecta			Hymenoptera			Ichneumonoidea	Braconidae	Doryctinae	Ecphylini								Hellén, 1957
40888	Animalia		Arthropoda			Insecta			Hymenoptera			Ichneumonoidea	Braconidae	Doryctinae	Ecphylini		Ecphylus						Förster, 1863	<p style="margin-left: 40px;"><i>TERENUSA </i>Marshall, 1885</p><p style="margin-left: 40px;"><i>PARAECPHYLUS </i>Ashmead, 1900</p><p style="margin-left: 40px;"><i>SACTOPUS </i>Ashmead, 1900</p>									Other species are treated as synonyms of silesiacus by Belokobylskij et al. (2003) but van Achterberg (in Belokobylskij et al. 2003) states that there is biological evidence for several species.
40889	Animalia		Arthropoda			Insecta			Hymenoptera			Ichneumonoidea	Braconidae	Doryctinae	Ecphylini		Ecphylus		eccoptogastri				(Ratzeburg, 1848)	<p style="margin-left: 40px;"><i>Bracon eccoptogastri </i>Ratzeburg, 1848</p>
40890	Animalia		Arthropoda			Insecta			Hymenoptera			Ichneumonoidea	Braconidae	Doryctinae	Ecphylini		Ecphylus		hylesini				(Ratzeburg, 1852)	<p style="margin-left: 40px;"><i>Bracon hylesini </i>Ratzeburg, 1852</p>							England		NMS, det. Shaw and van Achterberg, added in Fauna Europaea
40891	Animalia		Arthropoda			Insecta			Hymenoptera			Ichneumonoidea	Braconidae	Doryctinae	Ecphylini		Ecphylus		pinicola				Hedqvist, 1967								England, Scotland		NMS, det. Shaw and van Achterberg, added in Fauna Europaea
40892	Animalia		Arthropoda			Insecta			Hymenoptera			Ichneumonoidea	Braconidae	Doryctinae	Ecphylini		Ecphylus		silesiacus				(Ratzeburg, 1848)	<p style="margin-left: 40px;"><i>Bracon silesiacus </i>Ratzeburg, 1848</p><p style="margin-left: 40px;"><i>minutissimus </i>(Ratzeburg, 1848, <i>Bracon</i>) preocc.</p>							England		NMS, det. Shaw and van Achterberg, added in Fauna Europaea; Shaw (1998a) recorded silesiacus as British but was using the name in the broader sense (i.e. =eccoptogastri, =hylesini, =pinicola). Listed in Huddleston (1978) as eccoptogastri.
40893	Animalia		Arthropoda			Insecta			Hymenoptera			Ichneumonoidea	Braconidae	Doryctinae	Hecabolini								Förster, 1863
40894	Animalia		Arthropoda			Insecta			Hymenoptera			Ichneumonoidea	Braconidae	Doryctinae	Hecabolini		Hecabolus						Curtis, 1834	<p style="margin-left: 40px;"><i>ANISOPELMA </i>Wesmael, 1838</p>
40895	Animalia		Arthropoda			Insecta			Hymenoptera			Ichneumonoidea	Braconidae	Doryctinae	Hecabolini		Hecabolus		sulcatus				Curtis, 1834	<p style="margin-left: 40px;"><i>belgicus </i>(Wesmael, 1838, <i>Anisopelma</i>)</p>							England, Wales
40896	Animalia		Arthropoda			Insecta			Hymenoptera			Ichneumonoidea	Braconidae	Doryctinae	Hecabolini		Monolexis						Förster, 1863										Species of Monolexis excluded from the British and Irish list: fuscicornis Förster, 1863 lycti (Cresson, 1880, Anisopelma) minimus (Cresson, 1880, Anisopelma) utilis (Cresson, 1880, Anisopelma) doderoi (Mantero, 1910, Hecabolus) lavagnei Picard, 1913 atis Nixon, 1943] Seems to have been included on the British list only on the basis of specimens emerging from Oak (Quercus) timber imported from th…
40897	Animalia		Arthropoda			Insecta			Hymenoptera			Ichneumonoidea	Braconidae	Doryctinae	Heterospilini		Heterospilus						Haliday, 1836	<p style="margin-left: 40px;"><i>SYNODUS </i> misident.</p><p style="margin-left: 40px;"><i>TELEBOLUS </i>Marshall, 1888</p><p style="margin-left: 40px;"><i>KAREBA </i>Cameron, 1905</p><p style="margin-left: 40px;"><i>ANOCATOSTIGMA </i>Enderlein, 1920</p><p style="margin-left: 40px;"><i>HARPAGOLACCUS </i>Enderlein, 1920</p><p style="margin-left: 40px;"><i>Lituania </i>Jakimavičius, 1968</p>									species of Heterospilus excluded from the British and Irish list: [caesus (Nees, 1834, Bracon) misident. ] Excluded by Shaw &amp; Huddleston (1991), see also Shaw (1997).
40898	Animalia		Arthropoda			Insecta			Hymenoptera			Ichneumonoidea	Braconidae	Doryctinae	Heterospilini		Heterospilus		ater				Fischer, 1960								England		added by Shaw (1998a)
40899	Animalia		Arthropoda			Insecta			Hymenoptera			Ichneumonoidea	Braconidae	Doryctinae	Heterospilini		Heterospilus		fuscexilis				Shaw, 1997								England		added by Shaw (1997)
40900	Animalia		Arthropoda			Insecta			Hymenoptera			Ichneumonoidea	Braconidae	Doryctinae	Spathiini								Förster, 1863
40901	Animalia		Arthropoda			Insecta			Hymenoptera			Ichneumonoidea	Braconidae	Doryctinae	Spathiini		Spathius						Nees, 1818	<p style="margin-left: 40px;"><i>STENOPHASMUS </i>Smith, 1859</p><p style="margin-left: 40px;"><i>EUSPATHIUS </i>Förster, 1863</p><p style="margin-left: 40px;"><i>PSEUDOSPATHIUS </i>Szépligeti, 1902</p><p style="margin-left: 40px;"><i>RHACOSPATHIUS </i>Cameron, 1905</p>
40902	Animalia		Arthropoda			Insecta			Hymenoptera			Ichneumonoidea	Braconidae	Doryctinae	Spathiini		Spathius		brevicaudis				Ratzeburg, 1844								England, Wales		NMS, det. Shaw, added in Fauna Europaea
40903	Animalia		Arthropoda			Insecta			Hymenoptera			Ichneumonoidea	Braconidae	Doryctinae	Spathiini		Spathius		exarator				(Linnaeus, 1758)	<p style="margin-left: 40px;"><i>Ichneumon exarator </i>Linnaeus, 1758</p><p style="margin-left: 40px;"><i>formicatus </i>(Linnaeus, 1767, <i>Ichneumon</i>)</p><p style="margin-left: 40px;"><i>mutillarius </i>(Fabricius, 1775, <i>Ichneumon</i>)</p><p style="margin-left: 40px;"><i>mystacatus </i>(Schrank, 1781, <i>Ichneumon</i>)</p><p style="margin-left: 40px;"><i>affinis </i>(Fabricius, 1793, <i>…							England, Scotland, Wales, Ireland
40904	Animalia		Arthropoda			Insecta			Hymenoptera			Ichneumonoidea	Braconidae	Doryctinae	Spathiini		Spathius		pedestris				Wesmael, 1838	<p style="margin-left: 40px;"><i>apterus </i>Wollaston, 1858</p><p style="margin-left: 40px;"><i>maderi </i>Fahringer, 1930</p><p style="margin-left: 40px;"><i>hirtus </i>Hedqvist, 1976</p>							England		Recorded as new to Britain by Perkins &amp; Nixon (1939). Huddleston (1978) listed this as a species in need of confirmation, although, being wingless, it is straightforward to identify. There are additional British specimens in BMNH, World Museum Liverpool, Manchester Museum and Leeds City Museum.
40905	Animalia		Arthropoda			Insecta			Hymenoptera			Ichneumonoidea	Braconidae	Doryctinae	Spathiini		Spathius		phymatodis				Fischer, 1966								England		NMS, det. Shaw, added in Fauna Europaea
40906	Animalia		Arthropoda			Insecta			Hymenoptera			Ichneumonoidea	Braconidae	Doryctinae	Spathiini		Spathius		rubidus				(Rossius, 1794)	<p style="margin-left: 40px;"><i>Ichneumon rubidus </i>Rossius, 1794</p><p style="margin-left: 40px;"><i>umbrator </i>(Thunberg, 1824, <i>Ichneumon</i>) preocc,</p><p style="margin-left: 40px;"><i>rugosus </i>Ratzeburg, 1848</p><p style="margin-left: 40px;"><i>sculpturatus </i>Hellén, 1927</p><p style="margin-left: 40px;"><i>depressus </i>Hedqvist, 1976</p><p style="margin-left: 40px;"><i>bimacul…							England, Scotland, Ireland
40907	Animalia		Arthropoda			Insecta			Hymenoptera			Ichneumonoidea	Braconidae	Doryctinae	Spathiini		Spathius		umbratus				(Fabricius, 1798)	<p style="margin-left: 40px;"><i>Ichneumon umbratus </i>Fabricius, 1798</p><i>erythrocephalus </i>Wesmael, 1838</p><p style="margin-left: 40px;"><i>curvicaudis </i>Ratzeburg, 1844</p>									Spathius curvicaudis was recorded as new to Britain by Shaw (1988b) but synonymised under erythrocephalus by Belokobylskij & Samartsev (2014) and van Achterberg (2014), who also synonymyised erythrocephalus under umbratus.
40908	Animalia		Arthropoda			Insecta			Hymenoptera			Ichneumonoidea	Braconidae	Euphorinae									Förster, 1863										The tribal and generic classification follows Stigenberg et al. (2015).
40909	Animalia		Arthropoda			Insecta			Hymenoptera			Ichneumonoidea	Braconidae	Euphorinae	Centistini								Čapek, 1970
40910	Animalia		Arthropoda			Insecta			Hymenoptera			Ichneumonoidea	Braconidae	Euphorinae	Centistini		Allurus						Förster, 1863
40911	Animalia		Arthropoda			Insecta			Hymenoptera			Ichneumonoidea	Braconidae	Euphorinae	Centistini		Allurus		lituratus				(Haliday, 1835)	<p style="margin-left: 40px;"><i>Leiophron lituratus </i>Haliday, 1835</p>							Ireland		Synonymised under muricatus by van Achterberg (1985), later removed from synonymy by van Achterberg (1997), with a key to the species.
40912	Animalia		Arthropoda			Insecta			Hymenoptera			Ichneumonoidea	Braconidae	Euphorinae	Centistini		Allurus		muricatus				(Haliday, 1833)	<p style="margin-left: 40px;"><i>Ancylus muricatus </i>Haliday, 1833</p><p style="margin-left: 40px;"><i>armatus </i>(Wesmael, 1835, <i>Leiophron</i>)</p><p style="margin-left: 40px;"><i>niger </i>(Lyle, 1926, <i>Leiophron</i>)</p>							Scotland, Ireland
40913	Animalia		Arthropoda			Insecta			Hymenoptera			Ichneumonoidea	Braconidae	Euphorinae	Centistini		Centistes						Haliday, 1835
40914	Animalia		Arthropoda			Insecta			Hymenoptera			Ichneumonoidea	Braconidae	Euphorinae	Centistini		Centistes	Ancylocentrus					Förster, 1863										species of Centistes (Ancylocentrus) excluded from the British and Irish list [subsulcatus (Thomson, 1895, Leiophron) ] Not included in Huddleston (1978) but listed as British in Taxapad (Yu et al., 2012) as it was recorded by Kerrich (1932), as a tentative identification (by Roman), which has not been corroborated.
40915	Animalia		Arthropoda			Insecta			Hymenoptera			Ichneumonoidea	Braconidae	Euphorinae	Centistini		Centistes	Ancylocentrus	ater				(Nees, 1834)	<p style="margin-left: 40px;"><i>Leiophron ater </i>Nees, 1834</p><p style="margin-left: 40px;"><i>excrucians </i>(Haliday, 1835, <i>Leiophron</i>)</p><p style="margin-left: 40px;"><i>lativalvis </i>(Jakimavi?ius, 1972, <i>Allurus</i>)</p>							England, Ireland
40916	Animalia		Arthropoda			Insecta			Hymenoptera			Ichneumonoidea	Braconidae	Euphorinae	Centistini		Centistes	Ancylocentrus	collaris				(Thomson, 1895)	<p style="margin-left: 40px;"><i>Leiophron collaris </i>Thomson, 1895</p>							England, Ireland		NHM, det. Mason, Broad, added here
40917	Animalia		Arthropoda			Insecta			Hymenoptera			Ichneumonoidea	Braconidae	Euphorinae	Centistini		Centistes	Ancylocentrus	edentatus				(Haliday, 1835)	<p style="margin-left: 40px;"><i>Leiophron edentatus </i>Haliday, 1835</p>							England, Ireland
40918	Animalia		Arthropoda			Insecta			Hymenoptera			Ichneumonoidea	Braconidae	Euphorinae	Centistini		Centistes	Ancylocentrus	nasutus				(Wesmael, 1838)	<p style="margin-left: 40px;"><i>Eubadizon nasutus </i>Wesmael, 1838</p><p style="margin-left: 40px;"><i>saxo </i>(Reinhard, 1862, <i>Leiophron</i>)</p>							England		some distribution data from Luff (1976a)
40919	Animalia		Arthropoda			Insecta			Hymenoptera			Ichneumonoidea	Braconidae	Euphorinae	Centistini		Centistes	Centistes					Haliday, 1835	<p style="margin-left: 40px;"><i>Ancylus </i>Haliday, 1833</p><p style="margin-left: 40px;"><i>Ancyllus </i>Haldeman, 1842</p><p style="margin-left: 40px;"><i>EUPHORIDEA </i>Ashmead, 1900</p><p style="margin-left: 40px;"><i>LIOSIGALPHUS </i>Ashmead, 1900</p>
40920	Animalia		Arthropoda			Insecta			Hymenoptera			Ichneumonoidea	Braconidae	Euphorinae	Centistini		Centistes	Centistes	cuspidatus				(Haliday, 1833)	<p style="margin-left: 40px;"><i>Ancylus cuspidatus </i>Haliday, 1833</p><p style="margin-left: 40px;"><i>lucidator </i>(Nees, 1834, <i>Bracon</i>)</p>							England, Ireland
40921	Animalia		Arthropoda			Insecta			Hymenoptera			Ichneumonoidea	Braconidae	Euphorinae	Centistini		Centistes	Centistes	fuscipes				(Nees, 1834)	<p style="margin-left: 40px;"><i>Bracon fuscipes </i>Nees, 1834</p><p style="margin-left: 40px;"><i>fuscipes </i>(Wesmael, 1835, <i>Leiophron</i>)</p>							England
40922	Animalia		Arthropoda			Insecta			Hymenoptera			Ichneumonoidea	Braconidae	Euphorinae	Centistini		Centistes	Syrrhizus					Förster, 1863
40923	Animalia		Arthropoda			Insecta			Hymenoptera			Ichneumonoidea	Braconidae	Euphorinae	Centistini		Centistes	Syrrhizus	delusorius				(Förster, 1863)	<p style="margin-left: 40px;"><i>Syrrhizus delusorius </i>Förster, 1863</p>							England, Scotland
40924	Animalia		Arthropoda			Insecta			Hymenoptera			Ichneumonoidea	Braconidae	Euphorinae	Cosmophorini								Muesebeck &amp; Walkley, 1951
40925	Animalia		Arthropoda			Insecta			Hymenoptera			Ichneumonoidea	Braconidae	Euphorinae	Cosmophorini		Cosmophorus						Ratzeburg, 1848	<p style="margin-left: 40px;"><i>COSMOPHORINUS </i>Viereck, 1925</p>
40926	Animalia		Arthropoda			Insecta			Hymenoptera			Ichneumonoidea	Braconidae	Euphorinae	Cosmophorini		Cosmophorus		cembrae				Ruschka, 1925								England		added by Shaw (1989)
40927	Animalia		Arthropoda			Insecta			Hymenoptera			Ichneumonoidea	Braconidae	Euphorinae	Cosmophorini		Ropalophorus						Curtis, 1837	<p style="margin-left: 40px;"><i>Rhopalophorus </i>Blanchard, 1840 emendation, preocc.</p><p style="margin-left: 40px;"><i>CORYNOPHORE </i>Blanchard, 1845</p><p style="margin-left: 40px;"><i>EUSTALOCERUS </i>Förster, 1863</p>
40928	Animalia		Arthropoda			Insecta			Hymenoptera			Ichneumonoidea	Braconidae	Euphorinae	Cosmophorini		Ropalophorus		clavicornis				(Wesmael, 1835)	<p style="margin-left: 40px;"><i>Microctonus clavicornis </i>Wesmael, 1835</p><p style="margin-left: 40px;"><i>wisconsinensis </i>Shenefelt, 1960</p>							England
40929	Animalia		Arthropoda			Insecta			Hymenoptera			Ichneumonoidea	Braconidae	Euphorinae	Dinocampini								Shaw, 1985
40930	Animalia		Arthropoda			Insecta			Hymenoptera			Ichneumonoidea	Braconidae	Euphorinae	Dinocampini		Dinocampus						Förster, 1863
40931	Animalia		Arthropoda			Insecta			Hymenoptera			Ichneumonoidea	Braconidae	Euphorinae	Dinocampini		Dinocampus		coccinellae				(Schrank, 1802)	<p style="margin-left: 40px;"><i>Ichneumon coccinellae </i>Schrank, 1802</p><p style="margin-left: 40px;"><i>terminatus </i>(Nees, 1812, <i>Bracon</i>)</p><p style="margin-left: 40px;"><i>sculptus </i>(Cresson, 1872, <i>Euphorus</i>)</p><p style="margin-left: 40px;"><i>americanus </i>(Riley, 1888, <i>Centistes</i>)</p>							England, Scotland, Wales, Ireland
40932	Animalia		Arthropoda			Insecta			Hymenoptera			Ichneumonoidea	Braconidae	Euphorinae	Euphorini								Förster, 1863
40933	Animalia		Arthropoda			Insecta			Hymenoptera			Ichneumonoidea	Braconidae	Euphorinae	Euphorini		Leiophron						Nees, 1818										Distribution and much taxonomic data from Richards (1967), New (1970) and Loan (1974).
40934	Animalia		Arthropoda			Insecta			Hymenoptera			Ichneumonoidea	Braconidae	Euphorinae	Euphorini		Leiophron	Euphorus					Nees, 1834										Treated as a subgenus of Leiophron by Belokobylskij (2000a).
40935	Animalia		Arthropoda			Insecta			Hymenoptera			Ichneumonoidea	Braconidae	Euphorinae	Euphorini		Leiophron	Euphorus	duploclaviventris				Shenefelt, 1969	<p style="margin-left: 40px;"><i>claviventris </i>(Ruthe, 1856, <i>Microctonus</i>) preocc.</p><p style="margin-left: 40px;"><i>ruthei </i>Loan, 1974</p>							England
40936	Animalia		Arthropoda			Insecta			Hymenoptera			Ichneumonoidea	Braconidae	Euphorinae	Euphorini		Leiophron	Euphorus	pallidistigma				(Curtis, 1833)	<p style="margin-left: 40px;"><i>Leiophron pallidistigma </i>Curtis, 1833</p><p style="margin-left: 40px;"><i>pallicornis </i>(Nees, 1834, <i>Euphorus</i>)</p><p style="margin-left: 40px;"><i>claviventris </i>(Wesmael, 1835, <i>Microctonus</i>)</p><p style="margin-left: 40px;"><i>intacta </i>(Haliday, 1835, <i>Leiophron</i>)</p><p style="margin-left: 40px;"><i>parvula </i>(Ruthe, 1856, <i>Microct…							England, Ireland
40937	Animalia		Arthropoda			Insecta			Hymenoptera			Ichneumonoidea	Braconidae	Euphorinae	Euphorini		Leiophron	Euphorus	similis				(Curtis, 1833)	<p style="margin-left: 40px;"><i>Leiophron similis </i>Curtis, 1833</p><p style="margin-left: 40px;"><i>basalis </i>(Curtis, 1833, <i>Leiophron</i>)</p>							England, Wales, Ireland		Listed twice, under Microctonus and Leiophron, by Huddleston (1978).
40938	Animalia		Arthropoda			Insecta			Hymenoptera			Ichneumonoidea	Braconidae	Euphorinae	Euphorini		Leiophron	Leiophron					Nees, 1818	<p style="margin-left: 40px;"><i>Liophron </i>Förster, 1863</p>
40939	Animalia		Arthropoda			Insecta			Hymenoptera			Ichneumonoidea	Braconidae	Euphorinae	Euphorini		Leiophron	Leiophron	apicalis				Haliday, 1833	<p style="margin-left: 40px;"><i>apicalis </i>Curtis, 1833 preocc.</p><p style="margin-left: 40px;"><i>ornata </i>(Marshall, 1887, <i>Euphorus</i>)</p>							England, Ireland, Isle of Man		The type of Euphorus ornatus is lost but Loan (1974) suggested, on the basis of possible type material (collected in England), that ornata may be a synonym of apicalis, which has been formally proposed by Papp (2003).
40940	Animalia		Arthropoda			Insecta			Hymenoptera			Ichneumonoidea	Braconidae	Euphorinae	Euphorini		Leiophron	Leiophron	fascipennis				(Ruthe, 1856)	<p style="margin-left: 40px;"><i>Microctonus fascipennis </i>Ruthe, 1856</p><p style="margin-left: 40px;"><i>fasciipennis </i> misspelling</p><p style="margin-left: 40px;"><i>aciculata </i>Belokobylskij, 1993</p>							England
40941	Animalia		Arthropoda			Insecta			Hymenoptera			Ichneumonoidea	Braconidae	Euphorinae	Euphorini		Leiophron	Leiophron	fulvipes				Curtis, 1833								England
40942	Animalia		Arthropoda			Insecta			Hymenoptera			Ichneumonoidea	Braconidae	Euphorinae	Euphorini		Leiophron	Leiophron	heterocordyli				Richards, 1967								England
40943	Animalia		Arthropoda			Insecta			Hymenoptera			Ichneumonoidea	Braconidae	Euphorinae	Euphorini		Peristenus						Förster, 1863
40944	Animalia		Arthropoda			Insecta			Hymenoptera			Ichneumonoidea	Braconidae	Euphorinae	Euphorini		Peristenus		accinctus				(Haliday, 1835)	<p style="margin-left: 40px;"><i>Leiophron accinctus </i>Haliday, 1835</p><p style="margin-left: 40px;"><i>laeviventris </i>(Ruthe, 1856, <i>Microctonus</i>)</p><p style="margin-left: 40px;"><i>intermedius </i>(Ruthe, 1856, <i>Microctonus</i>)</p>									species of Peristenus excluded from the British and Irish list [brevicornis (Herrich-Schäffer, 1838, Perilitus)] Listed by Loan (1974) as incertae sedis within Peristenus or Leiophron, by Huddleston (1978) as a doubtfully placed species of Leiophron and by van Achterberg (in Belokobylskij et al., 2003) as a species of Peristenus. We cannot trace any references to this species occurring in Britain…
40945	Animalia		Arthropoda			Insecta			Hymenoptera			Ichneumonoidea	Braconidae	Euphorinae	Euphorini		Peristenus		antennalis				(Hincks, 1943) preocc.	<p style="margin-left: 40px;"><i>Leiophron antennalis </i>Hincks, 1943</p><p style="margin-left: 40px;"><i>picipes </i>(Haliday, 1835, <i>Leiophron</i>) preocc.</p>							Ireland		added by van Achterberg (1997); Hincks’s was a replacement name for Haliday’s use of the name picipes for a species that is distinct from picipes (Curtis). Preoccupied by Leiophron antennalis Watanabe, 1937 (now classified in Centistes (Ankylocentrus))
40946	Animalia		Arthropoda			Insecta			Hymenoptera			Ichneumonoidea	Braconidae	Euphorinae	Euphorini		Peristenus		facialis				(Thomson, 1892)	<p style="margin-left: 40px;"><i>Euphorus facialis </i>Thomson, 1892</p><p style="margin-left: 40px;"><i>fascialis </i> misspelling</p><p style="margin-left: 40px;"><i>microcerus </i>(Thomson, 1892, <i>Euphorus</i>)</p>							England, Wales
40947	Animalia		Arthropoda			Insecta			Hymenoptera			Ichneumonoidea	Braconidae	Euphorinae	Euphorini		Peristenus		grandiceps				(Thomson, 1892)	<p style="margin-left: 40px;"><i>Euphorus grandiceps </i>Thomson, 1892</p>							England, Ireland		Not listed by Huddleston (1978), although it was taken out of synonymy with orchesiae by Loan (1974).
40948	Animalia		Arthropoda			Insecta			Hymenoptera			Ichneumonoidea	Braconidae	Euphorinae	Euphorini		Peristenus		malatus				Loan, 1976								Scotland		distribution data from Loan (1976)
40949	Animalia		Arthropoda			Insecta			Hymenoptera			Ichneumonoidea	Braconidae	Euphorinae	Euphorini		Peristenus		nitidus				(Curtis, 1833)	<p style="margin-left: 40px;"><i>Leiophron nitidus </i>Curtis, 1833</p>							England
40950	Animalia		Arthropoda			Insecta			Hymenoptera			Ichneumonoidea	Braconidae	Euphorinae	Euphorini		Peristenus		orchesiae				(Curtis, 1833)	<p style="margin-left: 40px;"><i>Leiophron orchesiae </i>Curtis, 1833</p><p style="margin-left: 40px;"><i>rufibarbis </i>(Curtis, 1837, <i>Leiophron</i>)</p>							England
40951	Animalia		Arthropoda			Insecta			Hymenoptera			Ichneumonoidea	Braconidae	Euphorinae	Euphorini		Peristenus		orthotyli				(Richards, 1967)	<p style="margin-left: 40px;"><i>Leiophron orthotyli </i>Richards, 1967</p>							England
40952	Animalia		Arthropoda			Insecta			Hymenoptera			Ichneumonoidea	Braconidae	Euphorinae	Euphorini		Peristenus		pallipes				(Curtis, 1833)	<p style="margin-left: 40px;"><i>Leiophron pallipes </i>Curtis, 1833</p><p style="margin-left: 40px;"><i>barbiger </i>(Wesmael, 1835, <i>Microctonus</i>)</p>							England, Scotland, Ireland, Isle of Man		Van Achterberg has identified a Scottish specimen as barbiger, currently listed as a junior synonym of pallipes.
40953	Animalia		Arthropoda			Insecta			Hymenoptera			Ichneumonoidea	Braconidae	Euphorinae	Euphorini		Peristenus		pallipes				(Herrich-Schäffer, 1838) preocc.	<p style="margin-left: 40px;"><i>Perilitus pallipes </i>Herrich-Schäffer, 1838</p><p style="margin-left: 40px;"><i>mellipes </i>(Cresson, 1872, <i>Euphorus</i>)</p><p style="margin-left: 40px;"><i>punctatus </i>(Provancher, 1883, <i>Microctonus</i>)</p><p style="margin-left: 40px;"><i>tuberculifer </i>(Marshall, 1887, <i>Euphorus</i>)</p><p style="margin-left: 40px;"><i>nocturnus </i>(Viereck, 19…
40954	Animalia		Arthropoda			Insecta			Hymenoptera			Ichneumonoidea	Braconidae	Euphorinae	Euphorini		Peristenus		picipes				(Curtis, 1833)	<p style="margin-left: 40px;"><i>Leiophron picipes </i>Curtis, 1833</p><p style="margin-left: 40px;"><i>coactus </i>(Marshall, 1887, <i>Euphorus</i>)</p>							England, Ireland
40955	Animalia		Arthropoda			Insecta			Hymenoptera			Ichneumonoidea	Braconidae	Euphorinae	Helorimorphini								Schmiedeknecht, 1907
40956	Animalia		Arthropoda			Insecta			Hymenoptera			Ichneumonoidea	Braconidae	Euphorinae	Helorimorphini		Chrysopophthorus						Goidanich, 1948
40957	Animalia		Arthropoda			Insecta			Hymenoptera			Ichneumonoidea	Braconidae	Euphorinae	Helorimorphini		Chrysopophthorus		hungaricus				(Kiss, 1927)	<p style="margin-left: 40px;"><i>Helorimorpha hungaricus </i>Kiss, 1927</p><p style="margin-left: 40px;"><i>chrysopimaginis </i>Goidanich, 1948</p><p style="margin-left: 40px;"><i>elegans </i>Tobias, 1961</p>							England		added by Shaw (1996a)
40958	Animalia		Arthropoda			Insecta			Hymenoptera			Ichneumonoidea	Braconidae	Euphorinae	Helorimorphini		Wesmaelia						Förster, 1863
40959	Animalia		Arthropoda			Insecta			Hymenoptera			Ichneumonoidea	Braconidae	Euphorinae	Helorimorphini		Wesmaelia		petiolata				(Wollaston, 1858)	<p style="margin-left: 40px;"><i>Euphorus petiolatus </i>Wollaston, 1858</p><p style="margin-left: 40px;"><i>pendula </i>Förster, 1863</p><p style="margin-left: 40px;"><i>cremasta </i>Marshall, 1872</p><p style="margin-left: 40px;"><i>americana </i>Myers, 1917</p><p style="margin-left: 40px;"><i>asiatica </i>Shestakov, 1932</p>							England
40960	Animalia		Arthropoda			Insecta			Hymenoptera			Ichneumonoidea	Braconidae	Euphorinae	Myiocephalini								Chen &amp; van Achterberg, 1997	<p style="margin-left: 40px;"><i>LOXOCEPHALINI </i>Shaw, 1985 invalid</p>
40961	Animalia		Arthropoda			Insecta			Hymenoptera			Ichneumonoidea	Braconidae	Euphorinae	Myiocephalini		Myiocephalus						Marshall, 1897	<p style="margin-left: 40px;"><i>LOXOCEPHALUS </i>Förster, 1863 preocc.</p><p style="margin-left: 40px;"><i>SPILOMMA </i>Morley, 1909 </p>
40962	Animalia		Arthropoda			Insecta			Hymenoptera			Ichneumonoidea	Braconidae	Euphorinae	Myiocephalini		Myiocephalus		boops				(Wesmael, 1835)	<p style="margin-left: 40px;"><i>Microctonus boops </i>Wesmael, 1835</p><p style="margin-left: 40px;"><i>longipes </i>(Förster, 1863, <i>Loxocephalus</i>)</p><p style="margin-left: 40px;"><i>laticeps </i>(Provancher, 1886, <i>Gamosecus</i>)</p><p style="margin-left: 40px;"><i>falconivibrans </i>(Morley, 1909, <i>Spilomma</i>)</p><p style="margin-left: 40px;"><i>hedini </i>(Fahringer, 1930, <i>Aph…							England, Ireland
40963	Animalia		Arthropoda			Insecta			Hymenoptera			Ichneumonoidea	Braconidae	Euphorinae	Neoneurini								Bengtsson, 1918	<p style="margin-left: 40px;"><i>Elasmosomini </i>Viereck, 1918 </p>									Treated as a separate subfamily in many works (e.g. Shaw &amp; Huddleston, 1991; van Achterberg, 1993a) but recent phylogenetic studies have shown the neoneurines to be nested within the Euphorinae (e.g. Belshaw &amp; Quicke, 2002; Dowton et al., 2002).
40964	Animalia		Arthropoda			Insecta			Hymenoptera			Ichneumonoidea	Braconidae	Euphorinae	Neoneurini		Elasmosoma						Ruthe, 1858	<p style="margin-left: 40px;"><i>PARAMIRAX </i>Ashmead, 1895 unavailable</p>
40965	Animalia		Arthropoda			Insecta			Hymenoptera			Ichneumonoidea	Braconidae	Euphorinae	Neoneurini		Elasmosoma		berolinense				Ruthe, 1858								England		added by Shaw (2009)
40966	Animalia		Arthropoda			Insecta			Hymenoptera			Ichneumonoidea	Braconidae	Euphorinae	Neoneurini		Neoneurus						Haliday, 1838	<p style="margin-left: 40px;"><i>ECCLITES </i>Förster, 1863 </p><p style="margin-left: 40px;"><i>SIXIA </i>Vollenhoven, 1867 </p>
40967	Animalia		Arthropoda			Insecta			Hymenoptera			Ichneumonoidea	Braconidae	Euphorinae	Neoneurini		Neoneurus		auctus				(Thomson, 1895)	<p style="margin-left: 40px;"><i>Elasmosoma aucta </i>Thomson, 1895</p><p style="margin-left: 40px;"><i>halidaii </i>Marshall, 1897 </p><p style="margin-left: 40px;"><i>bistigmaticus </i>(Morley, 1909, <i>Euphorus</i>)</p>							England, Scotland
40968	Animalia		Arthropoda			Insecta			Hymenoptera			Ichneumonoidea	Braconidae	Euphorinae	Perilitini								Förster, 1863	<p style="margin-left: 40px;"><i>Microctonini </i>Shaw, 1985 </p>
40969	Animalia		Arthropoda			Insecta			Hymenoptera			Ichneumonoidea	Braconidae	Euphorinae	Perilitini		Microctonus						Wesmael, 1835	<p style="margin-left: 40px;"><i>GAMOSECUS </i>Provancher, 1880 </p>									Haeselbarth (2008) described many new species in Perilitus (Microctonus) but as Microctonus was raised to generic rank by Stigenberg et al. (2015), these are effectively new combinations in Microctonus
40970	Animalia		Arthropoda			Insecta			Hymenoptera			Ichneumonoidea	Braconidae	Euphorinae	Perilitini		Microctonus		aciculatus				(Haeselbarth, 2008)	<p style="margin-left: 40px;"><i>Perilitus aciculatus </i>Haeselbarth, 2008</p>							Ireland		added by Haeselbarth (2008)
40971	Animalia		Arthropoda			Insecta			Hymenoptera			Ichneumonoidea	Braconidae	Euphorinae	Perilitini		Microctonus		aethiops				Nees, 1834	<p style="margin-left: 40px;"><i>spurius </i>Ruthe, 1856 </p><p style="margin-left: 40px;"><i>?brevispina </i>(Thomson, 1892, <i>Euphorus</i>)</p><p style="margin-left: 40px;"><i>aethiopoides </i>Loan, 1975 </p>							England, Ireland
40972	Animalia		Arthropoda			Insecta			Hymenoptera			Ichneumonoidea	Braconidae	Euphorinae	Perilitini		Microctonus		alticae				(Haeselbarth, 2008)	<p style="margin-left: 40px;"><i>Perilitus alticae </i>Haeselbarth, 2008</p>							England		added by Haeselbarth (2008)
40973	Animalia		Arthropoda			Insecta			Hymenoptera			Ichneumonoidea	Braconidae	Euphorinae	Perilitini		Microctonus		aphthonae				(Haeselbarth, 2008)	<p style="margin-left: 40px;"><i>Perilitus aphthonae </i>Haeselbarth, 2008</p>							England, Ireland		added by Haeselbarth (2008)
40974	Animalia		Arthropoda			Insecta			Hymenoptera			Ichneumonoidea	Braconidae	Euphorinae	Perilitini		Microctonus		apiophaga				Loan, 1974
40975	Animalia		Arthropoda			Insecta			Hymenoptera			Ichneumonoidea	Braconidae	Euphorinae	Perilitini		Microctonus		areolatus				(Thomson, 1892)	<p style="margin-left: 40px;"><i>Perilitus areolatus </i>Thomson, 1892</p>							England
40976	Animalia		Arthropoda			Insecta			Hymenoptera			Ichneumonoidea	Braconidae	Euphorinae	Perilitini		Microctonus		belokobylskiji				(Haeselbarth, 2008)	<p style="margin-left: 40px;"><i>Perilitus belokobylskiji </i>Haeselbarth, 2008</p>							Ireland		added by Haeselbarth (2008)
40977	Animalia		Arthropoda			Insecta			Hymenoptera			Ichneumonoidea	Braconidae	Euphorinae	Perilitini		Microctonus		brassicae				(Haeselbarth, 2008)	<p style="margin-left: 40px;"><i>Perilitus brassicae </i>Haeselbarth, 2008</p>							England		added by Haeselbarth (2008)
40978	Animalia		Arthropoda			Insecta			Hymenoptera			Ichneumonoidea	Braconidae	Euphorinae	Perilitini		Microctonus		brevicollis				(Haliday, 1835)	<p style="margin-left: 40px;"><i>Perilitus brevicollis </i>Haliday, 1835</p>							England, Ireland
40979	Animalia		Arthropoda			Insecta			Hymenoptera			Ichneumonoidea	Braconidae	Euphorinae	Perilitini		Microctonus		cerealium				(Haliday, 1835)	<p style="margin-left: 40px;"><i>Perilitus cerealium </i>Haliday, 1835</p><p style="margin-left: 40px;"><i>secalis </i>(Haliday, 1833, <i>Perilitus</i>) unavailable</p>							England, Ireland
40980	Animalia		Arthropoda			Insecta			Hymenoptera			Ichneumonoidea	Braconidae	Euphorinae	Perilitini		Microctonus		colesi				Drea, 1968								Scotland, Ireland		added by Haeselbarth (2008)
40981	Animalia		Arthropoda			Insecta			Hymenoptera			Ichneumonoidea	Braconidae	Euphorinae	Perilitini		Microctonus		consuetor				(Nees, 1834)	<p style="margin-left: 40px;"><i>Perilitus consuetor </i>Nees, 1834</p>							Scotland		added by Haeselbarth (2008)
40982	Animalia		Arthropoda			Insecta			Hymenoptera			Ichneumonoidea	Braconidae	Euphorinae	Perilitini		Microctonus		debilis				(Wollaston, 1858)	<p style="margin-left: 40px;"><i>Perilitus debilis </i>Wollaston, 1858</p><p style="margin-left: 40px;"><i>?gracilipes </i>(Thomson, 1892, <i>Perilitus</i>)</p>							Ireland		added by Haeselbarth (2008)
40983	Animalia		Arthropoda			Insecta			Hymenoptera			Ichneumonoidea	Braconidae	Euphorinae	Perilitini		Microctonus		fagi				(Haeselbarth, 2008)	<p style="margin-left: 40px;"><i>Perilitus fagi </i>Haeselbarth, 2008</p>							England, Ireland		added by Haeselbarth (2008); specimens tentatively associated with the type material.
40984	Animalia		Arthropoda			Insecta			Hymenoptera			Ichneumonoidea	Braconidae	Euphorinae	Perilitini		Microctonus		fittkaui				(Haeselbarth, 2008)	<p style="margin-left: 40px;"><i>Perilitus fittkaui </i>Haeselbarth, 2008</p>							England		added by Haeselbarth (2008)
40985	Animalia		Arthropoda			Insecta			Hymenoptera			Ichneumonoidea	Braconidae	Euphorinae	Perilitini		Microctonus		flaviventris				(Thomson, 1892)	<p style="margin-left: 40px;"><i>Perilitus flaviventris </i>Thomson, 1892</p><p style="margin-left: 40px;"><i>areolatus </i>(Thomson, 1892, <i>Perilitus</i>)</p>							Ireland		added by Haeselbarth (2008)
40986	Animalia		Arthropoda			Insecta			Hymenoptera			Ichneumonoidea	Braconidae	Euphorinae	Perilitini		Microctonus		haszprunari				(Haeselbarth, 2008)	<p style="margin-left: 40px;"><i>Perilitus haszprunari </i>Haeselbarth, 2008</p>							Ireland		added by Haeselbarth (2008)
40987	Animalia		Arthropoda			Insecta			Hymenoptera			Ichneumonoidea	Braconidae	Euphorinae	Perilitini		Microctonus		lipari				Čapek &amp; Starý, 1995								England		added by Haeselbarth (2008)
40988	Animalia		Arthropoda			Insecta			Hymenoptera			Ichneumonoidea	Braconidae	Euphorinae	Perilitini		Microctonus		melanopus				Ruthe, 1856								England, Scotland, Ireland		added by Haeselbarth (2008)
40989	Animalia		Arthropoda			Insecta			Hymenoptera			Ichneumonoidea	Braconidae	Euphorinae	Perilitini		Microctonus		parcicornis				Ruthe, 1856								England
40990	Animalia		Arthropoda			Insecta			Hymenoptera			Ichneumonoidea	Braconidae	Euphorinae	Perilitini		Microctonus		perforatus				(Haeselbarth, 2008)	<p style="margin-left: 40px;"><i>Perilitus perforatus </i>Haeselbarth, 2008</p>							England		added by Haeselbarth (2008)
40991	Animalia		Arthropoda			Insecta			Hymenoptera			Ichneumonoidea	Braconidae	Euphorinae	Perilitini		Microctonus		podargae				(Haeselbarth, 2008)	<p style="margin-left: 40px;"><i>Perilitus podargae </i>Haeselbarth, 2008</p>							England		added by Haeselbarth (2008)
40992	Animalia		Arthropoda			Insecta			Hymenoptera			Ichneumonoidea	Braconidae	Euphorinae	Perilitini		Microctonus		retusus				Ruthe, 1856	<p style="margin-left: 40px;"><i>lancearius </i>Ruthe, 1856 </p><p style="margin-left: 40px;"><i>caudatus </i>(Thomson, 1892, <i>Perilitus</i>)</p>							England, Ireland		added by Luff (1976b); overlooked by Huddleston (1978) and O’Connor et al. (1999).
40993	Animalia		Arthropoda			Insecta			Hymenoptera			Ichneumonoidea	Braconidae	Euphorinae	Perilitini		Microctonus		silvularis				(Haeselbarth, 2008)	<p style="margin-left: 40px;"><i>Perilitus silvularis </i>Haeselbarth, 2008</p>							Scotland, Ireland		added by Haeselbarth (2008)
40994	Animalia		Arthropoda			Insecta			Hymenoptera			Ichneumonoidea	Braconidae	Euphorinae	Perilitini		Microctonus		stenocari				(Haeselbarth, 2008)	<p style="margin-left: 40px;"><i>Perilitus stenocari </i>Haeselbarth, 2008</p>							Scotland		added by Haeselbarth (2008)
40995	Animalia		Arthropoda			Insecta			Hymenoptera			Ichneumonoidea	Braconidae	Euphorinae	Perilitini		Microctonus		strophosomi				(Haeselbarth, 2008)	<p style="margin-left: 40px;"><i>Perilitus strophosomi </i>Haeselbarth, 2008</p>							Scotland, Ireland		added by Haeselbarth (2008)
40996	Animalia		Arthropoda			Insecta			Hymenoptera			Ichneumonoidea	Braconidae	Euphorinae	Perilitini		Microctonus		thyellae				(Haeselbarth, 2008)	<p style="margin-left: 40px;"><i>Perilitus thyellae </i>Haeselbarth, 2008</p>							England, Scotland		added by Haeselbarth (2008)
40997	Animalia		Arthropoda			Insecta			Hymenoptera			Ichneumonoidea	Braconidae	Euphorinae	Perilitini		Perilitus						Nees, 1818										species of Perilitus excluded from the British and Irish list: [falciger (Ruthe, 1856, Microctonus) ] Richards (1960) states that it is not known with certainty from Britain.
40998	Animalia		Arthropoda			Insecta			Hymenoptera			Ichneumonoidea	Braconidae	Euphorinae	Perilitini		Perilitus		areolaris				Gerdin &amp; Hedqvist, 1985								England		added by Haeselbarth (1999)
40999	Animalia		Arthropoda			Insecta			Hymenoptera			Ichneumonoidea	Braconidae	Euphorinae	Perilitini		Perilitus		dubius				(Wesmael, 1838)	<p style="margin-left: 40px;"><i>Microctonus dubius </i>Wesmael, 1838</p><p style="margin-left: 40px;"><i>rutilus </i>Herrich-Schäffer, 1838 preocc.</p>							England
41000	Animalia		Arthropoda			Insecta			Hymenoptera			Ichneumonoidea	Braconidae	Euphorinae	Perilitini		Perilitus		foveolatus				Reinhard, 1862	<p style="margin-left: 40px;"><i>sicheli </i>Giard, 1895 </p>							England, Wales
41001	Animalia		Arthropoda			Insecta			Hymenoptera			Ichneumonoidea	Braconidae	Euphorinae	Perilitini		Perilitus		marci				Haeselbarth, 1999								England		added by Haeselbarth (1999)
41002	Animalia		Arthropoda			Insecta			Hymenoptera			Ichneumonoidea	Braconidae	Euphorinae	Perilitini		Perilitus		rutilus				(Nees, 1811)	<p style="margin-left: 40px;"><i>Bracon rutilus </i>Nees, 1811</p><p style="margin-left: 40px;"><i>luteus </i>Herrich-Schäffer, 1838 </p><p style="margin-left: 40px;"><i>ruralis </i>Herrich-Schäffer, 1838 </p><p style="margin-left: 40px;"><i>strenuus </i>Marshall, 1887 </p><p style="margin-left: 40px;"><i>pyri </i>(Viereck, 1917, <i>Dinocampus</i>)</p><p style="margin-left: 40px;"><i>tuberculus <…							England, Ireland
41003	Animalia		Arthropoda			Insecta			Hymenoptera			Ichneumonoidea	Braconidae	Euphorinae	Perilitini		Rilipertus						Haeselbarth, 1996
41004	Animalia		Arthropoda			Insecta			Hymenoptera			Ichneumonoidea	Braconidae	Euphorinae	Perilitini		Rilipertus		intricatus				(Ruthe, 1859)	<p style="margin-left: 40px;"><i>Microctonus intricatus </i>Ruthe, 1859</p><p style="margin-left: 40px;"><i>borealis </i>(Thomson, 1892, <i>Perilitus</i>)</p>							Scotland, Ireland
41005	Animalia		Arthropoda			Insecta			Hymenoptera			Ichneumonoidea	Braconidae	Euphorinae	Perilitini		Spathicopis						van Achterberg, 1977
41006	Animalia		Arthropoda			Insecta			Hymenoptera			Ichneumonoidea	Braconidae	Euphorinae	Perilitini				flavocephala				van Achterberg, 1977								England		NMS, det. van Achterberg, added here
41007	Animalia		Arthropoda			Insecta			Hymenoptera			Ichneumonoidea	Braconidae	Euphorinae	Pygostolini								Belokobylskij, 2000
41008	Animalia		Arthropoda			Insecta			Hymenoptera			Ichneumonoidea	Braconidae	Euphorinae	Pygostolini		Pygostolus						Haliday, 1833										Distribution data from van Achterberg (1992a) and NHM.
41009	Animalia		Arthropoda			Insecta			Hymenoptera			Ichneumonoidea	Braconidae	Euphorinae	Pygostolini		Pygostolus		falcatus				(Nees, 1834)	<p style="margin-left: 40px;"><i>Leiophron falcatus </i>Nees, 1834</p><p style="margin-left: 40px;"><i>testaceus </i> misident.</p>							England, Ireland
41010	Animalia		Arthropoda			Insecta			Hymenoptera			Ichneumonoidea	Braconidae	Euphorinae	Pygostolini		Pygostolus		multiarticulatus				(Ratzeburg, 1852)	<p style="margin-left: 40px;"><i>Blacus multiarticulatus </i>Ratzeburg, 1852</p><p style="margin-left: 40px;"><i>falcatus </i>(Wesmael, 1838, <i>Blacus</i>) preocc.</p>							England
41011	Animalia		Arthropoda			Insecta			Hymenoptera			Ichneumonoidea	Braconidae	Euphorinae	Pygostolini		Pygostolus		otiorhynchi				(Boudier, 1834)	<p style="margin-left: 40px;"><i>Bracon otiorhynchi </i>Boudier, 1834</p>							England, Scotland		Van Achterberg (1992a) separated otiorhynchi from falcatus but Belokobylskij et al. (2003), without comment, treated the two names as synonymous again. This is not followed here as otiorhynchi and falcatus seem to be distinct species.
41012	Animalia		Arthropoda			Insecta			Hymenoptera			Ichneumonoidea	Braconidae	Euphorinae	Pygostolini		Pygostolus		sticticus				(Fabricius, 1798)	<p style="margin-left: 40px;"><i>Ichneumon sticticus </i>Fabricius, 1798</p><p style="margin-left: 40px;"><i>testaceus </i>(Fallén, 1813, <i>Bassus</i>) preocc.</p><p style="margin-left: 40px;"><i>sticticator </i>(Thunberg, 1824, <i>Ichneumon</i>)</p><p style="margin-left: 40px;"><i>barynoti </i>(Boudier, 1834, <i>Bracon</i>)</p><p style="margin-left: 40px;"><i>gigas </i>(Wesmael, 1835, <i>Blacus…							England, Scotland, Ireland, Isle of Man
41013	Animalia		Arthropoda			Insecta			Hymenoptera			Ichneumonoidea	Braconidae	Euphorinae	Syntretini								Shaw, 1985
41014	Animalia		Arthropoda			Insecta			Hymenoptera			Ichneumonoidea	Braconidae	Euphorinae	Syntretini		Syntretus						Förster, 1863	<p style="margin-left: 40px;"><i>Falcosyntretus </i>Tobias, 1965 </p><p style="margin-left: 40px;"><i>Parasyntretus </i>Belokobylskij, 1993 </p>									Distribution and synonymic data from van Achterberg &amp; Haeselbarth (2003). Species of Syntretus excluded from the British and Irish list: [parvicornis (Ruthe, 1862, Microctonus) ] Not listed as British or Irish by van Achterberg &amp; Haeselbarth (2003).
41015	Animalia		Arthropoda			Insecta			Hymenoptera			Ichneumonoidea	Braconidae	Euphorinae	Syntretini		Syntretus		breviradialis				van Achterberg &amp; Haeselbarth, 2003								England		added by Broad (2009)
41016	Animalia		Arthropoda			Insecta			Hymenoptera			Ichneumonoidea	Braconidae	Euphorinae	Syntretini		Syntretus		conterminus				(Nees, 1834)	<p style="margin-left: 40px;"><i>Perilitus conterminus </i>Nees, 1834</p>							England, Scotland, Ireland
41017	Animalia		Arthropoda			Insecta			Hymenoptera			Ichneumonoidea	Braconidae	Euphorinae	Syntretini		Syntretus		elegans				(Ruthe, 1856)	<p style="margin-left: 40px;"><i>Microctonus elegans </i>Ruthe, 1856</p><p style="margin-left: 40px;"><i>transsylvanicus </i>(Kiss, 1927, <i>Perilitus</i>)</p>							Ireland		added by van Achterberg &amp; Haeselbarth (2003)
41018	Animalia		Arthropoda			Insecta			Hymenoptera			Ichneumonoidea	Braconidae	Euphorinae	Syntretini		Syntretus		flevo				van Achterberg &amp; Haeselbarth, 2003								England, Ireland		added by van Achterberg &amp; Haeselbarth (2003)
41019	Animalia		Arthropoda			Insecta			Hymenoptera			Ichneumonoidea	Braconidae	Euphorinae	Syntretini		Syntretus		fuscicoxis				van Achterberg &amp; Haeselbarth, 2003								England, Ireland		added by van Achterberg &amp; Haeselbarth (2003)
41020	Animalia		Arthropoda			Insecta			Hymenoptera			Ichneumonoidea	Braconidae	Euphorinae	Syntretini		Syntretus		fuscivalvis				van Achterberg &amp; Haeselbarth, 2003								England, Scotland, Ireland		added by van Achterberg &amp; Haeselbarth (2003)
41021	Animalia		Arthropoda			Insecta			Hymenoptera			Ichneumonoidea	Braconidae	Euphorinae	Syntretini		Syntretus		idalius				(Haliday, 1833)	<p style="margin-left: 40px;"><i>Perilitus idalius </i>Haliday, 1833</p><p style="margin-left: 40px;"><i>vernalis </i>(Wesmael, 1835, <i>Microctonus</i>)</p><p style="margin-left: 40px;"><i>cultus </i>(Marshall, 1887, <i>Microctonus</i>)</p>							England, Scotland, Ireland
41022	Animalia		Arthropoda			Insecta			Hymenoptera			Ichneumonoidea	Braconidae	Euphorinae	Syntretini		Syntretus		ocularis				van Achterberg &amp; Haeselbarth, 2003								England, Wales, Scotland		added by van Achterberg &amp; Haeselbarth (2003)
41023	Animalia		Arthropoda			Insecta			Hymenoptera			Ichneumonoidea	Braconidae	Euphorinae	Syntretini		Syntretus		politus				(Ruthe, 1856)	<p style="margin-left: 40px;"><i>Microctonus politus </i>Ruthe, 1856</p><p style="margin-left: 40px;"><i>cynthius </i>(Curtis, 1837, <i>Microctonus</i>) nom. nud.</p><p style="margin-left: 40px;"><i>cynthius </i>Lyle, 1927 </p>							England, Ireland
41024	Animalia		Arthropoda			Insecta			Hymenoptera			Ichneumonoidea	Braconidae	Euphorinae	Syntretini		Syntretus		pusio				(Marshall, 1898)	<p style="margin-left: 40px;"><i>Microctonus pusio </i>Marshall, 1898</p>							England, Ireland
41025	Animalia		Arthropoda			Insecta			Hymenoptera			Ichneumonoidea	Braconidae	Euphorinae	Syntretini		Syntretus		splendidus				(Marshall, 1887)	<p style="margin-left: 40px;"><i>Microctonus splendidus </i>Marshall, 1887</p><p style="margin-left: 40px;"><i>testaceus </i>(Capron, 1887, <i>Microctonus</i>)</p><p style="margin-left: 40px;"><i>niger </i>Tobias, 1976 </p>							England, Scotland, Ireland		The female holotype of suffolciensis in NHM, described in the aphidiine genus Dyscritus (=Dyscritulus, replacement name), has remained uninterpreted, although Starý (1959) recognised that it is a euphorine. It is a normal specimen of Syntretus splendidus.
41026	Animalia		Arthropoda			Insecta			Hymenoptera			Ichneumonoidea	Braconidae	Euphorinae	Syntretini		Syntretus		taegeri				van Achterberg &amp; Haeselbarth, 2003								England		added by van Achterberg &amp; Haeselbarth (2003)
41027	Animalia		Arthropoda			Insecta			Hymenoptera			Ichneumonoidea	Braconidae	Euphorinae	Syntretini		Syntretus		xanthocephalus				(Marshall, 1887)	<p style="margin-left: 40px;"><i>Microctonus xanthocephalus </i>Marshall, 1887</p><p style="margin-left: 40px;"><i>tempestivus </i>(Curtis, 1837, <i>Microctonus</i>) nom. nud.</p><p style="margin-left: 40px;"><i>lyctaea </i>Cole, 1959 </p><p style="margin-left: 40px;"><i>lyctae </i>misspelling </p>							England, Scotland, Ireland
41028	Animalia		Arthropoda			Insecta			Hymenoptera			Ichneumonoidea	Braconidae	Euphorinae	Syntretini		Syntretus		zuijleni				van Achterberg &amp; Haeselbarth, 2003								England, Scotland, Ireland		added by van Achterberg &amp; Haeselbarth (2003)
41029	Animalia		Arthropoda			Insecta			Hymenoptera			Ichneumonoidea	Braconidae	Euphorinae	Townesilitini								Shaw, 1985
41030	Animalia		Arthropoda			Insecta			Hymenoptera			Ichneumonoidea	Braconidae	Euphorinae	Townesilitini		Streblocera						Westwood, 1833										Cosmophoridia Hedqvist, 1955 and Eutanycerus, usually considered synonymous with Streblocera, were regarded as valid subgenera by Chen &amp; van Achterberg (1997).
41031	Animalia		Arthropoda			Insecta			Hymenoptera			Ichneumonoidea	Braconidae	Euphorinae	Townesilitini		Streblocera	Streblocera					Westwood, 1833	<p style="margin-left: 40px;"><i>LECYTHODELLA </i>Enderlein, 1912 </p>
41032	Animalia		Arthropoda			Insecta			Hymenoptera			Ichneumonoidea	Braconidae	Euphorinae	Townesilitini		Streblocera	Streblocera	fulviceps				Westwood, 1833								England
41033	Animalia		Arthropoda			Insecta			Hymenoptera			Ichneumonoidea	Braconidae	Euphorinae	Townesilitini		Streblocera	Streblocera	longiscapha				Westwood, 1882								England
41034	Animalia		Arthropoda			Insecta			Hymenoptera			Ichneumonoidea	Braconidae	Euphorinae	Townesilitini		Streblocera	Eutanycerus					Förster, 1863	<p style="margin-left: 40px;"><i>Villocera </i>Chen &amp; van Achterberg, 1997 </p>
41035	Animalia		Arthropoda			Insecta			Hymenoptera			Ichneumonoidea	Braconidae	Euphorinae	Townesilitini		Streblocera	Eutanycerus	macroscapa				(Ruthe, 1856)	<p style="margin-left: 40px;"><i>Microctonus macroscapus </i>Ruthe, 1856</p><p style="margin-left: 40px;"><i>halidayana </i>(Förster, 1863, <i>Eutanycerus</i>)</p>							England
41036	Animalia		Arthropoda			Insecta			Hymenoptera			Ichneumonoidea	Braconidae	Euphorinae	Townesilitini		Townesilitus						Haeselbarth &amp; Loan, 1983
41037	Animalia		Arthropoda			Insecta			Hymenoptera			Ichneumonoidea	Braconidae	Euphorinae	Townesilitini		Townesilitus		aemulus				(Ruthe, 1856)	<p style="margin-left: 40px;"><i>Microctonus aemulus </i>Ruthe, 1856</p><p style="margin-left: 40px;"><i>punctifrontis </i>(Watanabe, 1955, <i>Microctonus</i>)</p>							England, Wales, Ireland		added by Haeselbarth (1988)
41038	Animalia		Arthropoda			Insecta			Hymenoptera			Ichneumonoidea	Braconidae	Euphorinae	Townesilitini		Townesilitus		bicolor				(Wesmael, 1835)	<p style="margin-left: 40px;"><i>Microctonus bicolor </i>Wesmael, 1835</p><p style="margin-left: 40px;"><i>breviradialis </i>(Tobias, 1976, <i>Microctonus</i>)</p>							England, Wales, Ireland
41039	Animalia		Arthropoda			Insecta			Hymenoptera			Ichneumonoidea	Braconidae	Euphorinae	Townesilitini		Townesilitus		deceptor				(Wesmael, 1835)	<p style="margin-left: 40px;"><i>Microctonus deceptor </i>Wesmael, 1835</p>							England, Scotland, Ireland		added by Haeselbarth (1988)
41040	Animalia		Arthropoda			Insecta			Hymenoptera			Ichneumonoidea	Braconidae	Euphorinae	Townesilitini		Townesilitus		fulviceps				(Ruthe, 1856)	<p style="margin-left: 40px;"><i>Microctonus fulviceps </i>Ruthe, 1856</p>							England		added by Haeselbarth (1988)
41041	Animalia		Arthropoda			Insecta			Hymenoptera			Ichneumonoidea	Braconidae	Exothecinae									Förster, 1863	<p style="margin-left: 40px;">PHANOMERINAE Fahringer, 1928 </p>
41042	Animalia		Arthropoda			Insecta			Hymenoptera			Ichneumonoidea	Braconidae	Exothecinae			Colastes						Haliday, 1833										Belokobylskij (1998) treats Shawiana and Xenarcha as subgenera of Colastes.
41043	Animalia		Arthropoda			Insecta			Hymenoptera			Ichneumonoidea	Braconidae	Exothecinae			Colastes	Colastes					Haliday, 1833	<p style="margin-left: 40px;"><i>EXOTHECUS </i>Wesmael, 1838 </p><p style="margin-left: 40px;"><i>PHANOMERIS </i>Förster, 1863 </p><p style="margin-left: 40px;"><i>PHAENOMERIS </i>Dalla Torre, 1898 </p>
41044	Animalia		Arthropoda			Insecta			Hymenoptera			Ichneumonoidea	Braconidae	Exothecinae			Colastes	Colastes	affinis				(Wesmael, 1838)	<p style="margin-left: 40px;"><i>Exothecus affinis </i>Wesmael, 1838</p>							England, Scotland, Wales		NMS, det. Shaw &amp; van Achterberg, added here; treated as a species of Xenarcha by Belokobylskij (1998).
41045	Animalia		Arthropoda			Insecta			Hymenoptera			Ichneumonoidea	Braconidae	Exothecinae			Colastes	Colastes	braconius				Haliday, 1833	<p style="margin-left: 40px;"><i>debilis </i>(Wesmael, 1838, <i>Exothecus</i>)</p><p style="margin-left: 40px;"><i>gracilis </i>Papp, 1975 </p>							England, Scotland, Wales, Ireland		some distribution data from Shaw &amp; Askew (1976)
41046	Animalia		Arthropoda			Insecta			Hymenoptera			Ichneumonoidea	Braconidae	Exothecinae			Colastes	Colastes	fragilis				(Haliday, 1836)	<p style="margin-left: 40px;"><i>Rogas fragilis </i>Haliday, 1836</p><p style="margin-left: 40px;"><i>semeyticus </i>Jakimavičius, 1969 </p>							England, Scotland
41047	Animalia		Arthropoda			Insecta			Hymenoptera			Ichneumonoidea	Braconidae	Exothecinae			Colastes	Colastes	incertus				(Wesmael, 1838)	<p style="margin-left: 40px;"><i>Exothecus incertus </i>Wesmael, 1838</p>							England, Scotland
41048	Animalia		Arthropoda			Insecta			Hymenoptera			Ichneumonoidea	Braconidae	Exothecinae			Colastes	Colastes	magdalenae				Sterzynski, 1983								England		NMS, det. Shaw &amp; van Achterberg, added on Fauna Europaea
41049	Animalia		Arthropoda			Insecta			Hymenoptera			Ichneumonoidea	Braconidae	Exothecinae			Colastes	Colastes	pubicornis				(Thomson, 1892)	<p style="margin-left: 40px;"><i>Exothecus pubicornis </i>Thomson, 1892</p>							England, Scotland		added by Godfray &amp; McGavin (1985)
41050	Animalia		Arthropoda			Insecta			Hymenoptera			Ichneumonoidea	Braconidae	Exothecinae			Colastes	Colastes	vividus				Papp, 1975								England		NMS, det. Shaw, added here
41051	Animalia		Arthropoda			Insecta			Hymenoptera			Ichneumonoidea	Braconidae	Exothecinae			Colastes	Fungivenator					van Achterberg &amp; Shaw, 2008
41052	Animalia		Arthropoda			Insecta			Hymenoptera			Ichneumonoidea	Braconidae	Exothecinae			Colastes	Fungivenator	sandei				van Achterberg &amp; Shaw, 2008								England		added by van Achterberg &amp; Shaw (2008)
41053	Animalia		Arthropoda			Insecta			Hymenoptera			Ichneumonoidea	Braconidae	Exothecinae			Shawiana						van Achterberg, 1983	<p style="margin-left: 40px;"><i>Phanomeris </i> misident.</p>
41054	Animalia		Arthropoda			Insecta			Hymenoptera			Ichneumonoidea	Braconidae	Exothecinae			Shawiana		catenator				(Haliday, 1836)	<p style="margin-left: 40px;"><i>Rogas catenator </i>Haliday, 1836</p>							England, Scotland, Wales		some distribution data from Shaw &amp; Askew (1976)
41055	Animalia		Arthropoda			Insecta			Hymenoptera			Ichneumonoidea	Braconidae	Exothecinae			Shawiana		laevis				(Thomson, 1892)	<p style="margin-left: 40px;"><i>Exothecus laevis </i>Thomson, 1892</p><p style="margin-left: 40px;"><i>rugulosus </i>(Hellén, 1959, <i>Colastes</i>)</p>							England		NMS, det. Shaw, added on Fauna Europaea
41056	Animalia		Arthropoda			Insecta			Hymenoptera			Ichneumonoidea	Braconidae	Exothecinae			Xenarcha						Förster, 1863	<p style="margin-left: 40px;"><i>ZAMEGASPILUS </i>Ashmead, 1900 </p>
41057	Animalia		Arthropoda			Insecta			Hymenoptera			Ichneumonoidea	Braconidae	Exothecinae			Xenarcha		abnormis				(Wesmael, 1838)	<p style="margin-left: 40px;"><i>Exothecus abnormis </i>Wesmael, 1838</p><p style="margin-left: 40px;"><i>glabricollis </i>(Thomson, 1892, <i>Exothecus</i>)</p>							England, Scotland, Wales		NMS, det. Shaw , added on Fauna Europaea
41058	Animalia		Arthropoda			Insecta			Hymenoptera			Ichneumonoidea	Braconidae	Exothecinae			Xenarcha		lustrator				(Haliday, 1836)	<p style="margin-left: 40px;"><i>Rogas lustrator </i>Haliday, 1836</p><p style="margin-left: 40px;"><i>dimidiatus </i>(Nees, 1834, <i>Bracon</i>) preocc.</p><p style="margin-left: 40px;"><i>lustratrix </i>Schulz, 1906 </p><p style="margin-left: 40px;"><i>thomsoni </i>(Szépligeti, 1906, <i>Phanomeris</i>)</p>							England, Wales, Ireland
41059	Animalia		Arthropoda			Insecta			Hymenoptera			Ichneumonoidea	Braconidae	Gnamptodontinae									Fischer, 1970	<p style="margin-left: 40px;">GNAPTODONTINAE misspelling</p><p style="margin-left: 40px;">GNAPTOGASTRINAE Tobias, 1976 </p>
41060	Animalia		Arthropoda			Insecta			Hymenoptera			Ichneumonoidea	Braconidae	Gnamptodontinae			Gnamptodon						Haliday, 1836	<p style="margin-left: 40px;"><i>GNAPTODON </i>Haliday, 1837 suppressed</p><p style="margin-left: 40px;"><i>DIRAPHUS </i>Wesmael, 1838 </p><p style="margin-left: 40px;"><i>MESOTAGES </i>Förster, 1863 </p>
41061	Animalia		Arthropoda			Insecta			Hymenoptera			Ichneumonoidea	Braconidae	Gnamptodontinae			Gnamptodon		decoris				(Förster, 1863)	<p style="margin-left: 40px;"><i>Mesotages decoris </i>Förster, 1863</p><p style="margin-left: 40px;"><i>klemensiewiczii </i>Niezabitowski, 1910 </p><p style="margin-left: 40px;"><i>bachmaieri </i>Fischer, 1957 </p>							England, Wales		NMS, det. Shaw, added on Fauna Europaea
41062	Animalia		Arthropoda			Insecta			Hymenoptera			Ichneumonoidea	Braconidae	Gnamptodontinae			Gnamptodon		pumilio				(Nees, 1834)	<p style="margin-left: 40px;"><i>Bracon pumilio </i>Nees, 1834</p><p style="margin-left: 40px;"><i>pygmaeus </i>(Wesmael, 1838, <i>Diraphus</i>)</p>							England, Scotland, Ireland		some distribution data from Shaw &amp; Askew (1976)
41063	Animalia		Arthropoda			Insecta			Hymenoptera			Ichneumonoidea	Braconidae	Helconinae									Förster, 1863										The Diospilini were removed to the Brachistinae by Sharanowski et al. (2011).
41064	Animalia		Arthropoda			Insecta			Hymenoptera			Ichneumonoidea	Braconidae	Helconinae	Helconini								Förster, 1863										Much distribution and taxonomic data from van Achterberg (1987).
41065	Animalia		Arthropoda			Insecta			Hymenoptera			Ichneumonoidea	Braconidae	Helconinae	Helconini		Helcon						Nees, 1814	<p style="margin-left: 40px;"><i>GYMNOSCELUS </i>Förster, 1863 </p><p style="margin-left: 40px;"><i>EDYIA </i>Cameron, 1905 </p><p style="margin-left: 40px;"><i>COELOSTEPHANUS </i>Kieffer, 1911 </p>
41066	Animalia		Arthropoda			Insecta			Hymenoptera			Ichneumonoidea	Braconidae	Helconinae	Helconini		Helcon		claviventris				Wesmael, 1835								England		added by van Achterberg (1987)
41067	Animalia		Arthropoda			Insecta			Hymenoptera			Ichneumonoidea	Braconidae	Helconinae	Helconini		Helcon		tardator				Nees, 1812	<p style="margin-left: 40px;"><i>?adulterator </i>(Villers, 1789, <i>Ichneumon</i>)</p>							England
41068	Animalia		Arthropoda			Insecta			Hymenoptera			Ichneumonoidea	Braconidae	Helconinae	Helconini		Helconidea						Viereck, 1914
41069	Animalia		Arthropoda			Insecta			Hymenoptera			Ichneumonoidea	Braconidae	Helconinae	Helconini		Helconidea		dentator				(Fabricius, 1804)	<p style="margin-left: 40px;"><i>Pimpla dentator </i>Fabricius, 1804</p><p style="margin-left: 40px;"><i>aequator </i>(Nees, 1812, <i>Helcon</i>)</p><p style="margin-left: 40px;"><i>tentator </i>(Thunberg, 1824, <i>Ichneumon</i>) preocc.</p><p style="margin-left: 40px;"><i>rugator </i>(Ratzeburg, 1848, <i>Helcon</i>)</p><p style="margin-left: 40px;"><i>armator </i>(Marshall, 1898, <i>Helcon</i>)<…							England		Helconidea armator (Marshall, 1898, Helcon) removed from synonymy by van Achterberg (2014).
41070	Animalia		Arthropoda			Insecta			Hymenoptera			Ichneumonoidea	Braconidae	Helconinae	Helconini		Helconidea		ruspator				(Linnaeus, 1758)	<p style="margin-left: 40px;"><i>Ichneumon ruspator </i>Linnaeus, 1758</p><p style="margin-left: 40px;"><i>dentator </i>(Nees, 1812, <i>Helcon</i>) preocc.</p>							England
41071	Animalia		Arthropoda			Insecta			Hymenoptera			Ichneumonoidea	Braconidae	Helconinae	Helconini		Wroughtonia						Cameron, 1899	<p style="margin-left: 40px;"><i>DUPORTIA </i>Kieffer, 1921 </p>
41072	Animalia		Arthropoda			Insecta			Hymenoptera			Ichneumonoidea	Braconidae	Helconinae	Helconini		Wroughtonia		spinator				(Lepeletier, 1825)	<p style="margin-left: 40px;"><i>Helcon spinator </i>Lepeletier, 1825</p><p style="margin-left: 40px;"><i>annulicornis </i>(Nees, 1834, <i>Helcon</i>)</p>							England
41073	Animalia		Arthropoda			Insecta			Hymenoptera			Ichneumonoidea	Braconidae	Homolobinae									van Achterberg, 1979
41074	Animalia		Arthropoda			Insecta			Hymenoptera			Ichneumonoidea	Braconidae	Homolobinae			Homolobus						Förster, 1863	<p style="margin-left: 40px;"><i>ZELE </i> misident.</p>									Shaw (2010) summarises the taxonomy and biology of British and Irish species, including some distribution data.
41075	Animalia		Arthropoda			Insecta			Hymenoptera			Ichneumonoidea	Braconidae	Homolobinae			Homolobus	Apatia					Enderlein, 1920
41076	Animalia		Arthropoda			Insecta			Hymenoptera			Ichneumonoidea	Braconidae	Homolobinae			Homolobus	Apatia	truncator				(Say, 1828)	<p style="margin-left: 40px;"><i>Bracon truncator </i>Say, 1828</p><p style="margin-left: 40px;"><i>calcarator </i>(Wesmael, 1835, <i>Phylax</i>)</p><p style="margin-left: 40px;"><i>melleus </i>(Cresson, 1872, <i>Phylax</i>)</p><p style="margin-left: 40px;"><i>crassicalcaratus </i>(Viereck, 1905, <i>Zele</i>)</p><p style="margin-left: 40px;"><i>calcaratrix </i>(Schulz, 1906, <i>Zele</i>)</p><p st…							England		Nixon’s description of chlorophthalmus validated the use of the name for this taxon; chlorophthalmus of authors is a misidentification (Bracon chlorophthalmus Spinola, 1808 is actually a species of the true Zele).
41077	Animalia		Arthropoda			Insecta			Hymenoptera			Ichneumonoidea	Braconidae	Homolobinae			Homolobus	Chartolobus					van Achterberg, 1979
41078	Animalia		Arthropoda			Insecta			Hymenoptera			Ichneumonoidea	Braconidae	Homolobinae			Homolobus	Chartolobus	infumator				(Lyle, 1914)	<p style="margin-left: 40px;"><i>Zele infumator </i>Lyle, 1914</p><p style="margin-left: 40px;"><i>wesmaeli </i>(Bengtsson, 1918, <i>Phylacter</i>)</p><p style="margin-left: 40px;"><i>japonicus </i>(Watanabe, 1932, <i>Zele</i>)</p>							England, Scotland, Wales, Ireland
41079	Animalia		Arthropoda			Insecta			Hymenoptera			Ichneumonoidea	Braconidae	Homolobinae			Homolobus	Homolobus					Förster, 1863
41080	Animalia		Arthropoda			Insecta			Hymenoptera			Ichneumonoidea	Braconidae	Homolobinae			Homolobus	Homolobus	discolor				(Wesmael, 1835)	<p style="margin-left: 40px;"><i>Phylax discolor </i>Wesmael, 1835</p><p style="margin-left: 40px;"><i>pectoralis </i>(Herrich-Schäffer, 1838, <i>Rogas</i>)</p>							England, Wales, Ireland
41081	Animalia		Arthropoda			Insecta			Hymenoptera			Ichneumonoidea	Braconidae	Homolobinae			Homolobus	Oulophus					van Achterberg, 1979
41082	Animalia		Arthropoda			Insecta			Hymenoptera			Ichneumonoidea	Braconidae	Homolobinae			Homolobus	Oulophus	flagitator				(Curtis, 1837)	<p style="margin-left: 40px;"><i>Zele flagitator </i>Curtis, 1837</p><p style="margin-left: 40px;"><i>geminator </i>(Lyle, 1914, <i>Zele</i>)</p>							England, Scotland, Wales, Ireland
41083	Animalia		Arthropoda			Insecta			Hymenoptera			Ichneumonoidea	Braconidae	Homolobinae			Homolobus	Phylacter					Reinhard, 1863
41084	Animalia		Arthropoda			Insecta			Hymenoptera			Ichneumonoidea	Braconidae	Homolobinae			Homolobus	Phylacter	annulicornis				(Nees, 1834)	<p style="margin-left: 40px;"><i>Rogas annulicornis </i>Nees, 1834</p><p style="margin-left: 40px;"><i>testaceator </i> misident.</p><p style="margin-left: 40px;"><i>simplex </i>(Herrich-Schäffer, 1838, <i>Rogas</i>)</p>							England, Scotland, Ireland
41085	Animalia		Arthropoda			Insecta			Hymenoptera			Ichneumonoidea	Braconidae	Hormiinae									Förster, 1863
41086	Animalia		Arthropoda			Insecta			Hymenoptera			Ichneumonoidea	Braconidae	Hormiinae			Hormius						Nees, 1818	<p style="margin-left: 40px;"><i>CHLIDONIA </i>Herrich-Schäffer, 1838 </p><p style="margin-left: 40px;"><i>HORMIELLUS </i>Enderlein, 1912 </p><p style="margin-left: 40px;"><i>MEDIELLA </i>Hedqvist, 1963 </p><p style="margin-left: 40px;"><i>ANHORMIUS </i>Belokobylskij, 1989 </p>
41087	Animalia		Arthropoda			Insecta			Hymenoptera			Ichneumonoidea	Braconidae	Hormiinae			Hormius		maderae				Graham, 1986								England		NMS, det. Shaw &amp; van Achterberg, added on Fauna Europaea
41088	Animalia		Arthropoda			Insecta			Hymenoptera			Ichneumonoidea	Braconidae	Hormiinae			Hormius		moniliatus				(Nees, 1811)	<p style="margin-left: 40px;"><i>Bracon moniliatus </i>Nees, 1811</p><p style="margin-left: 40px;"><i>brevipennis </i>Hellén, 1957 </p><p style="margin-left: 40px;"><i>dusmeti </i>(Docavo Alberti, 1960, <i>Hormiopterus</i>)</p><p style="margin-left: 40px;"><i>insularis </i>Hedqvist, 1965 </p><p style="margin-left: 40px;"><i>coniceps </i>Hellén, 1957 </p>							England, Ireland, Isle of Man
41089	Animalia		Arthropoda			Insecta			Hymenoptera			Ichneumonoidea	Braconidae	Hormiinae			Hormius		piciventris				Wesmael, 1838								England, Scotland, Wales, Ireland, Isle of Man		NMS, det. Shaw &amp; van Achterberg, added on Fauna Europaea. Considered here to be a valid species; van Achterberg (in Belokobylskij et al., 2003) considered that piciventris may be a distinct species, but it is listed as a synonym of moniliatus in Taxapad (Yu et al., 2012).
41090	Animalia		Arthropoda			Insecta			Hymenoptera			Ichneumonoidea	Braconidae	Ichneutinae									Förster, 1863
41091	Animalia		Arthropoda			Insecta			Hymenoptera			Ichneumonoidea	Braconidae	Ichneutinae	Ichneutini								Förster, 1863
41092	Animalia		Arthropoda			Insecta			Hymenoptera			Ichneumonoidea	Braconidae	Ichneutinae	Ichneutini		Ichneutes						Nees, 1814
41093	Animalia		Arthropoda			Insecta			Hymenoptera			Ichneumonoidea	Braconidae	Ichneutinae	Ichneutini		Ichneutes		brevis				Wesmael, 1835								England, Ireland
41094	Animalia		Arthropoda			Insecta			Hymenoptera			Ichneumonoidea	Braconidae	Ichneutinae	Ichneutini		Ichneutes		reunitor				Nees, 1816	<p style="margin-left: 40px;"><i>costatus </i>(Zetterstedt, 1838, <i>Microgaster</i>)</p><p style="margin-left: 40px;"><i>laeviventris </i>Hellén, 1958 </p><p style="margin-left: 40px;"><i>leptostigma </i>Hellén, 1958 </p>							England, Ireland
41095	Animalia		Arthropoda			Insecta			Hymenoptera			Ichneumonoidea	Braconidae	Ichneutinae	Proteropini								van Achterberg, 1976
41096	Animalia		Arthropoda			Insecta			Hymenoptera			Ichneumonoidea	Braconidae	Ichneutinae	Proteropini		Proterops						Wesmael, 1835	<p style="margin-left: 40px;"><i>ICHNEUTIDEA </i>Ashmead, 1900 </p><p style="margin-left: 40px;"><i>PROTEROPOIDES </i>Viereck, 1909 </p>
41097	Animalia		Arthropoda			Insecta			Hymenoptera			Ichneumonoidea	Braconidae	Ichneutinae	Proteropini		Proterops		nigripennis				Wesmael, 1835								England, Scotland, Ireland
41098	Animalia		Arthropoda			Insecta			Hymenoptera			Ichneumonoidea	Braconidae	Macrocentrinae									Förster, 1863
41099	Animalia		Arthropoda			Insecta			Hymenoptera			Ichneumonoidea	Braconidae	Macrocentrinae			Austrozele						Roman, 1910	<p style="margin-left: 40px;"><i>PANISCOZELE </i>Enderlein, 1920 </p><p style="margin-left: 40px;"><i>PALINZELE </i>Brues, 1922 </p><p style="margin-left: 40px;"><i>LAEVIS </i>Sharma, 1982 </p>
41100	Animalia		Arthropoda			Insecta			Hymenoptera			Ichneumonoidea	Braconidae	Macrocentrinae			Austrozele		longipalpis				van Achterberg, 1993								England		added by van Achterberg (1993b)
41101	Animalia		Arthropoda			Insecta			Hymenoptera			Ichneumonoidea	Braconidae	Macrocentrinae			Macrocentrus						Curtis, 1833	<p style="margin-left: 40px;"><i>AMICROPLUS </i>Förster, 1863 </p><p style="margin-left: 40px;"><i>AMICROPLITES </i>Dalla Torre, 1898 </p><p style="margin-left: 40px;"><i>FHOGRA </i>Cameron, 1901 </p><p style="margin-left: 40px;"><i>LEPTOZELE </i>Cameron, 1910 </p><p style="margin-left: 40px;"><i>METAPLEURODON </i>Enderlein, 1920 </p><p style="margin-left: 40px;"><i>PSEUDOPHYLACTER </i>Fahringer,…									Distribution data from Eady &amp; Clark (1964) and van Achterberg &amp; Haeselbarth (1983).
41102	Animalia		Arthropoda			Insecta			Hymenoptera			Ichneumonoidea	Braconidae	Macrocentrinae			Macrocentrus		bicolor				Curtis, 1833	<p style="margin-left: 40px;"><i>limbator </i>(Ratzeburg, 1848, <i>Rogas</i>)</p><p style="margin-left: 40px;"><i>gracilipes </i>Telenga, 1935 </p>							England, Scotland, Wales, Ireland, Isle of Man		Van Achterberg & Haeselbarth (1983) and van Achterberg (1993b) treat gracilipes as a synonym of bicolor but Belokobylskij et al. (2003) list it as a synonym of thoracicus.
41103	Animalia		Arthropoda			Insecta			Hymenoptera			Ichneumonoidea	Braconidae	Macrocentrinae			Macrocentrus		blandus				Eady and Clark, 1964								England, Scotland, Ireland
41104	Animalia		Arthropoda			Insecta			Hymenoptera			Ichneumonoidea	Braconidae	Macrocentrinae			Macrocentrus		cingulum				Brischke, 1882	<p style="margin-left: 40px;"><i>grandii </i>Goidanich, 1937 </p><p style="margin-left: 40px;"><i>gifuensis </i>misident. </p>							England
41105	Animalia		Arthropoda			Insecta			Hymenoptera			Ichneumonoidea	Braconidae	Macrocentrinae			Macrocentrus		collaris				(Spinola, 1808)	<p style="margin-left: 40px;"><i>Bracon collaris </i>Spinola, 1808</p><p style="margin-left: 40px;"><i>ebeninus </i>(Nees, 1834, <i>Bracon</i>)</p><p style="margin-left: 40px;"><i>dubius </i>(Wesmael, 1835, <i>Eubadizon</i>)</p><p style="margin-left: 40px;"><i>picipes </i>(Haliday, 1835, <i>Helcon</i>)</p><p style="margin-left: 40px;"><i>dispar </i>(Kollar, 1852, <i>Bracon</i>) preocc.</p><p styl…							England, Ireland
41106	Animalia		Arthropoda			Insecta			Hymenoptera			Ichneumonoidea	Braconidae	Macrocentrinae			Macrocentrus		equalis				Lyle, 1914								England
41107	Animalia		Arthropoda			Insecta			Hymenoptera			Ichneumonoidea	Braconidae	Macrocentrinae			Macrocentrus		infirmus				(Nees, 1834)	<p style="margin-left: 40px;"><i>Rogas infirmus </i>Nees, 1834</p>							England, Scotland, Ireland, Isle of Man
41108	Animalia		Arthropoda			Insecta			Hymenoptera			Ichneumonoidea	Braconidae	Macrocentrinae			Macrocentrus		linearis				(Nees, 1812)	<p style="margin-left: 40px;"><i>Bracon linearis </i>Nees, 1812</p><p style="margin-left: 40px;"><i>abdominalis </i>(Fabricius, 1793, <i>Ichneumon</i>) preocc.</p><p style="margin-left: 40px;"><i>abdominator </i>(Thunberg, 1824, <i>Ichneumon</i>)</p><p style="margin-left: 40px;"><i>fissura </i>(Thunberg, 1824, <i>Ichneumon</i>)</p><p style="margin-left: 40px;"><i>pallidator </i>(Zetterstedt, 1838…							England, Scotland, Ireland, Isle of Man
41109	Animalia		Arthropoda			Insecta			Hymenoptera			Ichneumonoidea	Braconidae	Macrocentrinae			Macrocentrus		marginator				(Nees, 1811)	<p style="margin-left: 40px;"><i>Bracon marginator </i>Nees, 1811</p><p style="margin-left: 40px;"><i>rugator </i>(Ratzeburg, 1848, <i>Rogas</i>)</p>							England, Scotland, Ireland		The North American Macrocentrus aegeriae Rohwer, 1915 was removed from synonymy by van Achterberg &amp; Haeselbarth (1983).
41110	Animalia		Arthropoda			Insecta			Hymenoptera			Ichneumonoidea	Braconidae	Macrocentrinae			Macrocentrus		nidulator				(Nees, 1834)	<p style="margin-left: 40px;"><i>Rogas nidulator </i>Nees, 1834</p><p style="margin-left: 40px;"><i>longicaudis </i>(Herrich-Schäffer, 1838, <i>Rogas</i>)</p><p style="margin-left: 40px;"><i>procerus </i>Costa, 1884 </p><p style="margin-left: 40px;"><i>curticaudis </i>Telenga, 1950 </p>							England, Scotland, Wales, Ireland
41111	Animalia		Arthropoda			Insecta			Hymenoptera			Ichneumonoidea	Braconidae	Macrocentrinae			Macrocentrus		nitidus				(Wesmael, 1835)	<p style="margin-left: 40px;"><i>Rogas nitidus </i>Wesmael, 1835</p>							England, Scotland
41112	Animalia		Arthropoda			Insecta			Hymenoptera			Ichneumonoidea	Braconidae	Macrocentrinae			Macrocentrus		pallipes				(Nees, 1811)	<p style="margin-left: 40px;"><i>Bracon pallipes </i>Nees, 1811</p><p style="margin-left: 40px;"><i>pallidipes </i>Dalla Torre, 1898 </p>							England
41113	Animalia		Arthropoda			Insecta			Hymenoptera			Ichneumonoidea	Braconidae	Macrocentrinae			Macrocentrus		resinellae				(Linnaeus, 1758)	<p style="margin-left: 40px;"><i>Ichneumon resinellae </i>Linnaeus, 1758</p><p style="margin-left: 40px;"><i>resinator </i>(Thunberg, 1824, <i>Ichneumon</i>) unavailable</p><p style="margin-left: 40px;"><i>flavipes </i>(Ratzeburg, 1844, <i>Rogas</i>)</p><p style="margin-left: 40px;"><i>interstitialis </i>(Ratzeburg, 1844, <i>Rogas</i>)</p><p style="margin-left: 40px;"><i>obscurator </i>(Ratzeburg…							England, Scotland
41114	Animalia		Arthropoda			Insecta			Hymenoptera			Ichneumonoidea	Braconidae	Macrocentrinae			Macrocentrus		sylvestrellae				van Achterberg, 2001								England		NMS, det. Shaw, added here
41115	Animalia		Arthropoda			Insecta			Hymenoptera			Ichneumonoidea	Braconidae	Macrocentrinae			Macrocentrus		thoracicus				(Nees, 1811)	<p style="margin-left: 40px;"><i>Bracon thoracicus </i>Nees, 1811</p><p style="margin-left: 40px;"><i>longicornis </i>(Wesmael, 1835, <i>Rogas</i>)</p>							England, Wales
41116	Animalia		Arthropoda			Insecta			Hymenoptera			Ichneumonoidea	Braconidae	Macrocentrinae			Macrocentrus		townesi				van Achterberg &amp; Haeselbarth, 1983								England, Scotland, Ireland		added by van Achterberg &amp; Haeselbarth (1983)
41117	Animalia		Arthropoda			Insecta			Hymenoptera			Ichneumonoidea	Braconidae	Meteorinae									Cresson, 1887	<p style="margin-left: 40px;">ZELINAE Ashmead, 1900 </p><p style="margin-left: 40px;">ZEMIOTINAE van Achterberg, 1976 </p>									Stigenberg et al. (2015) included the meteorines as a basal tribe of Euphorinae, rather than as a separate subfamily, as was the preference of many authors, for example, Shaw &amp; Huddleston (1991). In light of their very different developmental biology (parasitoids of larval Lepidoptera and Coleoptera as opposed to parasitising adult insects) and sister-group position to the euphorines, we reta…
41118	Animalia		Arthropoda			Insecta			Hymenoptera			Ichneumonoidea	Braconidae	Meteorinae			Meteorus						Haliday, 1835	<p style="margin-left: 40px;"><i>SAPROTICHUS </i>Holmgren, 1868 </p><p style="margin-left: 40px;"><i>PACHYTHECUS </i>Cameron, 1912 preocc.</p>									Distribution and synonymic data from Huddleston (1980), Stigenberg &amp; Ronquist (2011) and Stigenberg &amp; Shaw (2013), except where noted. Taxonomy follows Stigenberg &amp; Ronquist (2011). Species of Meteorus excluded from the British and Irish list [flaviceps (Ratzeburg, 1844, Perilitus) nom. dub.]
41119	Animalia		Arthropoda			Insecta			Hymenoptera			Ichneumonoidea	Braconidae	Meteorinae			Meteorus		abdominator				(Nees, 1811)	<p style="margin-left: 40px;"><i>Perilitus abdominator </i>Nees, 1811</p><p style="margin-left: 40px;"><i>brunnipes </i>(Ruthe, 1862, <i>Perilitus</i>)</p><p style="margin-left: 40px;"><i>bruneipes </i>Dalla Torre, 1898 </p><p style="margin-left: 40px;"><i>brevipesalis </i>Shenefelt, 1969 </p><p style="margin-left: 40px;"><i>?delator </i>(Haliday, 1835, <i>Perilitus</i>)</p>							England, Scotland, Wales, Ireland
41120	Animalia		Arthropoda			Insecta			Hymenoptera			Ichneumonoidea	Braconidae	Meteorinae			Meteorus		abscissus				Thomson, 1895								England, Scotland, Ireland
41121	Animalia		Arthropoda			Insecta			Hymenoptera			Ichneumonoidea	Braconidae	Meteorinae			Meteorus		affinis				(Wesmael, 1835)	<p style="margin-left: 40px;"><i>Perilitus affinis </i>Wesmael, 1835</p><p style="margin-left: 40px;"><i>gracilis </i>Ruthe, 1862 preocc.</p><p style="margin-left: 40px;"><i>punctiventris </i>Ruthe, 1862 </p><p style="margin-left: 40px;"><i>ruthei </i>Schmiedeknecht, 1897 </p><p style="margin-left: 40px;"><i>voloscensis </i>Fischer, 1959 </p>							England, Scotland, Wales, Ireland
41122	Animalia		Arthropoda			Insecta			Hymenoptera			Ichneumonoidea	Braconidae	Meteorinae			Meteorus		alborossicus				Lobodenko, 2000								England		added by Stigenberg &amp; Ronquist (2011)
41123	Animalia		Arthropoda			Insecta			Hymenoptera			Ichneumonoidea	Braconidae	Meteorinae			Meteorus		brevicauda				Thomson, 1895	<p style="margin-left: 40px;"><i>thuringiacus </i>Schmiedeknecht, 1897 </p><p style="margin-left: 40px;"><i>mongolicus </i>Fahringer, 1935 </p>							England		Listed by Huddleston (1978) but Huddleston (1980) could not find any British or Irish material. Shaw (1988a) subsequently recorded it as a British species.
41124	Animalia		Arthropoda			Insecta			Hymenoptera			Ichneumonoidea	Braconidae	Meteorinae			Meteorus		cespitator				(Thunberg, 1824)	<p style="margin-left: 40px;"><i>Ichneumon cespitator </i>Thunberg, 1824</p><p style="margin-left: 40px;"><i>atrator </i>(Curtis, 1832, <i>Zele</i>)</p><p style="margin-left: 40px;"><i>similator </i>(Nees, 1834, <i>Perilitus</i>)</p><p style="margin-left: 40px;"><i>microcerus </i>(Wesmael, 1835, <i>Perilitus</i>)</p><p style="margin-left: 40px;"><i>humeralis </i>(Zetterstedt, 1838, <i>Bracon</i>)…							England, Scotland, Wales, Ireland
41125	Animalia		Arthropoda			Insecta			Hymenoptera			Ichneumonoidea	Braconidae	Meteorinae			Meteorus		cinctellus				(Spinola, 1808)	<p style="margin-left: 40px;"><i>Bracon cinctellus </i>Spinola, 1808</p><p style="margin-left: 40px;"><i>fuscipes </i>(Wesmael, 1835, <i>Perilitus</i>)</p>							England, Scotland, Wales		This has recently been identified as Meteorus necator (e.g. Belokobulskij et al., 2003) but, according to Stigenberg &amp; Ronquist (2011), Ichneumon necator Fabricius, 1777, is actually a species of Microgastrinae.
41126	Animalia		Arthropoda			Insecta			Hymenoptera			Ichneumonoidea	Braconidae	Meteorinae			Meteorus		cis				(Bouché, 1834)	<p style="margin-left: 40px;"><i>Bracon cis </i>Bouché, 1834</p><p style="margin-left: 40px;"><i>profligator </i>(Haliday, 1835, <i>Perilitus</i>)</p>							England, Scotland, Wales, Ireland
41127	Animalia		Arthropoda			Insecta			Hymenoptera			Ichneumonoidea	Braconidae	Meteorinae			Meteorus		colon				(Haliday, 1835)	<p style="margin-left: 40px;"><i>Perilitus colon </i>Haliday, 1835</p><p style="margin-left: 40px;"><i>fragilis </i>(Wesmael, 1835, <i>Perilitus</i>)</p><p style="margin-left: 40px;"><i>fasciatus </i>(Ratzeburg, 1844, <i>Perilitus</i>)</p><p style="margin-left: 40px;"><i>alternatus </i>Ruthe, 1862 </p><p style="margin-left: 40px;"><i>continuus </i>Ruthe, 1862 </p><p style="margin-left: 40px;"><i>…							England, Scotland, Wales, Ireland
41128	Animalia		Arthropoda			Insecta			Hymenoptera			Ichneumonoidea	Braconidae	Meteorinae			Meteorus		consimilis				(Nees, 1834)	<p style="margin-left: 40px;"><i>Perilitus consimilis </i>Nees, 1834</p><p style="margin-left: 40px;"><i>brevipes </i>(Wesmael, 1835, <i>Perilitus</i>)</p><p style="margin-left: 40px;"><i>albicornis </i>Ruthe, 1862 </p><p style="margin-left: 40px;"><i>flagellatus </i>Alexeev, 1971 </p>							England, Ireland
41129	Animalia		Arthropoda			Insecta			Hymenoptera			Ichneumonoidea	Braconidae	Meteorinae			Meteorus		eadyi				Huddleston, 1980								England, Wales		added by Huddleston (1980)
41130	Animalia		Arthropoda			Insecta			Hymenoptera			Ichneumonoidea	Braconidae	Meteorinae			Meteorus		eklundi				Stigenberg, 2011								England		added by Stigenberg &amp; Ronquist (2011)
41131	Animalia		Arthropoda			Insecta			Hymenoptera			Ichneumonoidea	Braconidae	Meteorinae			Meteorus		filator				(Haliday, 1835)	<p style="margin-left: 40px;"><i>Perilitus filator </i>Haliday, 1835</p><p style="margin-left: 40px;"><i>laticeps </i>(Wesmael, 1835, <i>Perilitus</i>)</p><p style="margin-left: 40px;"><i>hodisensis </i>Fischer, 1970 </p>							England, Scotland, Ireland
41132	Animalia		Arthropoda			Insecta			Hymenoptera			Ichneumonoidea	Braconidae	Meteorinae			Meteorus		heliophilus				Fischer, 1970								England		added by Huddleston (1980)
41133	Animalia		Arthropoda			Insecta			Hymenoptera			Ichneumonoidea	Braconidae	Meteorinae			Meteorus		hirsutipes				Huddleston, 1980								England, Ireland		added by Huddleston (1980)
41134	Animalia		Arthropoda			Insecta			Hymenoptera			Ichneumonoidea	Braconidae	Meteorinae			Meteorus		ictericus				(Nees, 1811)	<p style="margin-left: 40px;"><i>Bracon ictericus </i>Nees, 1811</p><p style="margin-left: 40px;"><i>minutor </i>(Thunberg, 1824, <i>Ichneumon</i>)</p><p style="margin-left: 40px;"><i>lucidator </i>(Trentepohl, 1829, <i>Bracon</i>)</p><p style="margin-left: 40px;"><i>ephippium </i>(Curtis, 1832, <i>Zele</i>)</p><p style="margin-left: 40px;"><i>xanthomelas </i>(Wesmael, 1835, <i>Perilitus</i>)</p>…							England, Scotland, Wales, Ireland, Isle of Man
41135	Animalia		Arthropoda			Insecta			Hymenoptera			Ichneumonoidea	Braconidae	Meteorinae			Meteorus		jaculator				(Haliday, 1835)	<p style="margin-left: 40px;"><i>Perilitus jaculator </i>Haliday, 1835</p><p style="margin-left: 40px;"><i>obscurellus </i>Ruthe, 1862 </p><p style="margin-left: 40px;"><i>tenuicornis </i>Thomson, 1895 </p><p style="margin-left: 40px;"><i>turcicus </i>Fahringer, 1944 </p>							England, Scotland, Wales, Ireland
41136	Animalia		Arthropoda			Insecta			Hymenoptera			Ichneumonoidea	Braconidae	Meteorinae			Meteorus		limbatus				Maeto, 1989								England, Scotland		added by Stigenberg &amp; Ronquist (2011)
41137	Animalia		Arthropoda			Insecta			Hymenoptera			Ichneumonoidea	Braconidae	Meteorinae			Meteorus		lionotus				Thomson, 1895	<p style="margin-left: 40px;"><i>ruficoloratus </i>Fischer, 1957 </p>							England, Scotland		added by Huddleston (1980)
41138	Animalia		Arthropoda			Insecta			Hymenoptera			Ichneumonoidea	Braconidae	Meteorinae			Meteorus		longipilosus				Stigenberg, 2011								England, Wales		added by Stigenberg &amp; Shaw (2013)
41139	Animalia		Arthropoda			Insecta			Hymenoptera			Ichneumonoidea	Braconidae	Meteorinae			Meteorus		melanostictus				Capron, 1887	<p style="margin-left: 40px;"><i>niger </i>Lyle, 1913 </p><p style="margin-left: 40px;"><i>monachae </i>Tobias, 1986 </p>							England
41140	Animalia		Arthropoda			Insecta			Hymenoptera			Ichneumonoidea	Braconidae	Meteorinae			Meteorus		micropterus				(Haliday, 1835)	<p style="margin-left: 40px;"><i>Perilitus micropterus </i>Haliday, 1835</p>							England, Scotland, Wales, Ireland
41141	Animalia		Arthropoda			Insecta			Hymenoptera			Ichneumonoidea	Braconidae	Meteorinae			Meteorus		obfuscatus				(Nees, 1811)	<p style="margin-left: 40px;"><i>Bracon obfuscatus </i>Nees, 1811</p><p style="margin-left: 40px;"><i>thoracicus </i>(Curtis, 1832, <i>Zele</i>)</p><p style="margin-left: 40px;"><i>formosus </i>(Wesmael, 1835, <i>Perilitus</i>)</p><p style="margin-left: 40px;"><i>orchesiae </i>(Boie, 1841, <i>Alysia</i>)</p><p style="margin-left: 40px;"><i>fodori </i>Papp, 1973 </p>							England
41142	Animalia		Arthropoda			Insecta			Hymenoptera			Ichneumonoidea	Braconidae	Meteorinae			Meteorus		obsoletus				(Wesmael, 1835)	<p style="margin-left: 40px;"><i>Perilitus obsoletus </i>Wesmael, 1835</p><p style="margin-left: 40px;"><i>viridanae </i>Johansson, 1964 </p>							England, Scotland, Ireland		added by Huddleston (1980)
41143	Animalia		Arthropoda			Insecta			Hymenoptera			Ichneumonoidea	Braconidae	Meteorinae			Meteorus		oculatus				Ruthe, 1862								Scotland		added by Stigenberg &amp; Shaw (2013)
41144	Animalia		Arthropoda			Insecta			Hymenoptera			Ichneumonoidea	Braconidae	Meteorinae			Meteorus		pendulus				(Müller, 1776)	<p style="margin-left: 40px;"><i>Ichneumon pendulus </i>Müller, 1776</p><p style="margin-left: 40px;"><i>pendulator </i>(Latreille, 1799, <i>Ichneumon</i>)</p><p style="margin-left: 40px;"><i>gyrator </i>(Thunberg, 1824, <i>Ichneumon</i>)</p><p style="margin-left: 40px;"><i>ochraceator </i>(Curtis, 1832, <i>Zele</i>) nom. nud.</p><p style="margin-left: 40px;"><i>scutellator </i>(Nees, 1834, <i>Pe…							England, Scotland, Wales, Ireland
41145	Animalia		Arthropoda			Insecta			Hymenoptera			Ichneumonoidea	Braconidae	Meteorinae			Meteorus		pulchricornis				(Wesmael, 1835)	<p style="margin-left: 40px;"><i>Perilitus pulchricornis </i>Wesmael, 1835</p><p style="margin-left: 40px;"><i>striatus </i>Thomson, 1895 </p><p style="margin-left: 40px;"><i>thomsoni </i>Marshall, 1899 </p><p style="margin-left: 40px;"><i>japonicus </i>Ashmead, 1906 </p><p style="margin-left: 40px;"><i>nipponensis </i>Viereck, 1912 </p><p style="margin-left: 40px;"><i>baicalensis </i>Telenga, 19…							England, Scotland, Wales, Ireland		added by Huddleston (1980)
41146	Animalia		Arthropoda			Insecta			Hymenoptera			Ichneumonoidea	Braconidae	Meteorinae			Meteorus		rubens				(Nees, 1811)	<p style="margin-left: 40px;"><i>Bracon rubens </i>Nees, 1811</p><p style="margin-left: 40px;"><i>leviventris </i>(Wesmael, 1835, <i>Perilitus</i>)</p><p style="margin-left: 40px;"><i>islandicus </i>Ruthe, 1859 </p><p style="margin-left: 40px;"><i>medianus </i>Ruthe, 1862 </p><p style="margin-left: 40px;"><i>vulgaris </i>(Cresson, 1872, <i>Perilitus</i>)</p><p style="margin-left: 40px;"><i>dejanu…							England, Scotland, Wales, Ireland, Isle of Man
41147	Animalia		Arthropoda			Insecta			Hymenoptera			Ichneumonoidea	Braconidae	Meteorinae			Meteorus		ruficeps				Nees, 1834	<p style="margin-left: 40px;"><i>pallipes </i>(Wesmael, 1835, <i>Perilitus</i>)</p><p style="margin-left: 40px;"><i>nigritarsis </i>Ruthe, 1862 </p><p style="margin-left: 40px;"><i>pallidipes </i>Marshall, 1887 </p>							England, Scotland, Ireland, Isle of Man
41148	Animalia		Arthropoda			Insecta			Hymenoptera			Ichneumonoidea	Braconidae	Meteorinae			Meteorus		rufus				(DeGeer, 1773)	<p style="margin-left: 40px;"><i>Ichneumon rufus </i>DeGeer, 1773</p><p style="margin-left: 40px;"><i>rufus </i>(Retzius, 1783, <i>Ichneumon</i>) preocc.</p><p style="margin-left: 40px;"><i>unicolor </i>(Wesmael, 1835, <i>Perilitus</i>)</p><p style="margin-left: 40px;"><i>chinensis </i>(Holmgren, 1868, <i>Saprotichus</i>)</p>							England, Wales
41149	Animalia		Arthropoda			Insecta			Hymenoptera			Ichneumonoidea	Braconidae	Meteorinae			Meteorus		sibyllae				Stigenberg, 2011								England, Scotland		added by Stigenberg &amp; Shaw (2013)
41150	Animalia		Arthropoda			Insecta			Hymenoptera			Ichneumonoidea	Braconidae	Meteorinae			Meteorus		sulcatus				Szépligeti, 1896	<p style="margin-left: 40px;"><i>insignis </i>Muesebeck, 1939 </p><p style="margin-left: 40px;"><i>molorchi </i>Fischer, 1966 </p>							England
41151	Animalia		Arthropoda			Insecta			Hymenoptera			Ichneumonoidea	Braconidae	Meteorinae			Meteorus		tabidus				(Wesmael, 1835)	<p style="margin-left: 40px;"><i>Perilitus tabidus </i>Wesmael, 1835</p><p style="margin-left: 40px;"><i>dubius </i>Ruthe, 1862 </p><p style="margin-left: 40px;"><i>facialis </i>Ruthe, 1862 </p><p style="margin-left: 40px;"><i>pentheri </i>Fischer, 1970 </p>							England, Scotland, Ireland
41152	Animalia		Arthropoda			Insecta			Hymenoptera			Ichneumonoidea	Braconidae	Meteorinae			Meteorus		tenellus				Marshall, 1887	<p style="margin-left: 40px;"><i>boreus </i>Tobias, 1986 </p>							Scotland		added by Stigenberg &amp; Shaw (2013). Separated from cinctellus by Stigenberg &amp; Ronquist (2011); Marshall (1887) gave no locality data so the first documented British occurrence was published by Stigenberg &amp; Shaw (2013).
41153	Animalia		Arthropoda			Insecta			Hymenoptera			Ichneumonoidea	Braconidae	Meteorinae			Meteorus		versicolor				(Wesmael, 1835)	<p style="margin-left: 40px;"><i>Perilitus versicolor </i>Wesmael, 1835</p><p style="margin-left: 40px;"><i>bimaculatus </i>(Wesmael, 1835, <i>Perilitus</i>)</p><p style="margin-left: 40px;"><i>unicolor </i>(Hartig, 1838, <i>Perilitus</i>) preocc.</p><p style="margin-left: 40px;"><i>brevicornis </i>(Ratzeburg, 1844, <i>Perilitus</i>) preocc.</p><p style="margin-left: 40px;"><i>rugator </i>(Ratzeb…							England, Scotland, Wales, Ireland
41154	Animalia		Arthropoda			Insecta			Hymenoptera			Ichneumonoidea	Braconidae	Meteorinae			Meteorus		vexator				(Haliday, 1835)	<p style="margin-left: 40px;"><i>Perilitus vexator </i>Haliday, 1835</p>							England, Scotland, Ireland
41155	Animalia		Arthropoda			Insecta			Hymenoptera			Ichneumonoidea	Braconidae	Meteorinae			Zele						Curtis, 1832	<p style="margin-left: 40px;"><i>Protelus </i>Förster, 1863 </p><p style="margin-left: 40px;"><i>Zemiotes </i>Förster, 1863 </p>									Synonymic and some distribution data from van Achterberg (1979, 1984a) and Stigenberg &amp; Shaw (2013). Zele longicauda Curtis, 1832 is apparently a synonym of a species of Eubazus (van Achterberg, pers. comm.). species of Zele excluded from the British and Irish list [annulicrus (Thomson, 1895, Meteorus)] Included in Huddleston’s (1978) checklist but we can trace no specimens or literature cita…
41156	Animalia		Arthropoda			Insecta			Hymenoptera			Ichneumonoidea	Braconidae	Meteorinae			Zele		albiditarsus				Curtis, 1832	<p style="margin-left: 40px;"><i>testaceator </i>Curtis, 1832 </p><p style="margin-left: 40px;"><i>albitarsis </i>(Nees, 1834, <i>Perilitus</i>)</p><p style="margin-left: 40px;"><i>dispar </i>(Wesmael, 1835, <i>Perilitus</i>)</p><p style="margin-left: 40px;"><i>calcitrator </i>(Curtis, 1837, <i>Meteorus</i>)</p><p style="margin-left: 40px;"><i>wesmaeli </i>(Boie, 1850, <i>Perilitus</i>)</p><p sty…							England, Scotland, Wales, Ireland
41157	Animalia		Arthropoda			Insecta			Hymenoptera			Ichneumonoidea	Braconidae	Meteorinae			Zele		caligatus				(Haliday, 1835)	<p style="margin-left: 40px;"><i>Meteorus caligatus </i>Haliday, 1835</p><p style="margin-left: 40px;"><i>neesii </i>(Ruthe, 1862, <i>Meteorus</i>)</p><p style="margin-left: 40px;"><i>alaskensis </i>(Ashmead, 1902, <i>Dyscoletes</i>)</p><p style="margin-left: 40px;"><i>sibiricus </i>(Fahringer, 1930, <i>Meteorus</i>)</p>							England, Scotland, Wales, Ireland
41158	Animalia		Arthropoda			Insecta			Hymenoptera			Ichneumonoidea	Braconidae	Meteorinae			Zele		chlorophthalmus				(Spinola, 1808)	<p style="margin-left: 40px;"><i>Bracon chlorophthalmus </i>Spinola, 1808</p><p style="margin-left: 40px;"><i>chrysophthalmus </i>(Nees, 1811, <i>Bracon</i>)</p><p style="margin-left: 40px;"><i>pallidus </i>(Nees, 1811, <i>Bracon</i>)</p><p style="margin-left: 40px;"><i>nudator </i>(Thunberg, 1824, <i>Ichneumon</i>)</p><p style="margin-left: 40px;"><i>splendens </i>(Costa, 1884, <i>Meteorus</i>)<…							England, Scotland, Ireland
41159	Animalia		Arthropoda			Insecta			Hymenoptera			Ichneumonoidea	Braconidae	Meteorinae			Zele		deceptor				(Wesmael, 1835)	<p style="margin-left: 40px;"><i>Perilitus deceptor </i>Wesmael, 1835</p><p style="margin-left: 40px;"><i>pallitarsis </i>(Cresson, 1872, <i>Perilitus</i>)</p><p style="margin-left: 40px;"><i>rufulus </i>(Thomson, 1895, <i>Meteorus</i>)</p><p style="margin-left: 40px;"><i>palliditarsis </i>(Dalla Torre, 1898, <i>Meteorus</i>)</p><p style="margin-left: 40px;"><i>maximus </i>(Muesebeck, 1923, <i>Me…							England, Scotland, Wales, Ireland
41160	Animalia		Arthropoda			Insecta			Hymenoptera			Ichneumonoidea	Braconidae	Microgastrinae									Förster, 1863										The generic classification of Microgastrinae broadly follows Papp (1988), based on Mason’s (1981a) phylogenetic treatment of microgastrines that split up the large genus ‘Apanteles’, which in turn built upon Nixon’s (1965) assignment of ‘Apanteles’ into species groups. We do not follow van Achterberg’s (2003a) recent generic revision (reflected in Fauna Europaea), which reassigned many genera to …
41161	Animalia		Arthropoda			Insecta			Hymenoptera			Ichneumonoidea	Braconidae	Microgastrinae	Apantelini								Viereck, 1918
41162	Animalia		Arthropoda			Insecta			Hymenoptera			Ichneumonoidea	Braconidae	Microgastrinae	Apantelini		Apanteles						Förster, 1863	<p style="margin-left: 40px;"><i>UROGASTER </i>Ashmead, 1898 </p><p style="margin-left: 40px;"><i>XESTAPANTELES </i>Cameron, 1910 </p><p style="margin-left: 40px;"><i>ALLAPANTELES </i>Brèthes, 1915 </p><p style="margin-left: 40px;"><i>AREOLATUS </i>Rao &amp; Chalikwar, 1976 unavailable</p>									The generic placement of several species treated by Nixon (1973) in his metacarpalis group, here largely apportioned between Apanteles and Dolichogenidea following Papp (1988), is questionable (cf. van Achterberg, 2003a). species of Apanteles excluded from the British and Irish list: [anomalon (Curtis, 1830, Microgaster)] This name appeared in Huddleston (1978) but is not listed by Papp (1988) or…
41163	Animalia		Arthropoda			Insecta			Hymenoptera			Ichneumonoidea	Braconidae	Microgastrinae	Apantelini		Apanteles		atreus				Nixon, 1973								England
41164	Animalia		Arthropoda			Insecta			Hymenoptera			Ichneumonoidea	Braconidae	Microgastrinae	Apantelini		Apanteles		brunnistigma				Abdinbekova, 1969	<p style="margin-left: 40px;"><i>sotades </i>Nixon, 1976 </p>							England, Scotland, Wales, Isle of Man
41165	Animalia		Arthropoda			Insecta			Hymenoptera			Ichneumonoidea	Braconidae	Microgastrinae	Apantelini		Apanteles		carpatus				(Say, 1836)	<p style="margin-left: 40px;"><i>Microgaster carpata</i> Say, 1836</p><p style="margin-left: 40px;"><i>solitarius </i>(Ashmead,1900) </p><p style="margin-left: 40px;"><i>hawaiiensis </i>(Ashmead, 1901) </p><p style="margin-left: 40px;"><i>fuscicornis </i>(Cameron, 1910) </p><p style="margin-left: 40px;"><i>piceoventris </i>Muesebeck, 1921 </p><p style="margin-left: 40px;"><i>igae </i>Watanabe, 19…							England
41166	Animalia		Arthropoda			Insecta			Hymenoptera			Ichneumonoidea	Braconidae	Microgastrinae	Apantelini		Apanteles		chrysis				Nixon, 1973								England
41167	Animalia		Arthropoda			Insecta			Hymenoptera			Ichneumonoidea	Braconidae	Microgastrinae	Apantelini		Apanteles		contaminatus				(Haliday, 1834)	<p style="margin-left: 40px;"><i>Microgaster contaminatus</i> Haliday, 1834</p>							Scotland, Ireland
41168	Animalia		Arthropoda			Insecta			Hymenoptera			Ichneumonoidea	Braconidae	Microgastrinae	Apantelini		Apanteles		corvinus				Reinhard, 1880	<p style="margin-left: 40px;"><i>lucidus </i>Szépligeti, 1896 </p><p style="margin-left: 40px;"><i>rasteratus </i>Fahringer, 1936 </p><p style="margin-left: 40px;"><i>aptus </i>Papp, 1977 </p>							England, Scotland
41169	Animalia		Arthropoda			Insecta			Hymenoptera			Ichneumonoidea	Braconidae	Microgastrinae	Apantelini		Apanteles		galleriae				Wilkinson, 1932								England		added by Shaw (2012)
41170	Animalia		Arthropoda			Insecta			Hymenoptera			Ichneumonoidea	Braconidae	Microgastrinae	Apantelini		Apanteles		lacteus				(Nees, 1834)	<p style="margin-left: 40px;"><i>Microgaster lacteus</i> Nees, 1834</p>							England		We follow Mason’s (1981a) placement of lacteus in Apanteles rather than Papp’s (1988) placement in Dolichogenidea.
41171	Animalia		Arthropoda			Insecta			Hymenoptera			Ichneumonoidea	Braconidae	Microgastrinae	Apantelini		Apanteles		lenea				Nixon, 1976								England, Scotland, Ireland
41172	Animalia		Arthropoda			Insecta			Hymenoptera			Ichneumonoidea	Braconidae	Microgastrinae	Apantelini		Apanteles		metacarpalis				(Thomson, 1895)	<p style="margin-left: 40px;"><i>Microgaster metacarpalis</i> Thomson, 1895</p>							England, Ireland
41173	Animalia		Arthropoda			Insecta			Hymenoptera			Ichneumonoidea	Braconidae	Microgastrinae	Apantelini		Apanteles		miramis				Nixon, 1976								England
41174	Animalia		Arthropoda			Insecta			Hymenoptera			Ichneumonoidea	Braconidae	Microgastrinae	Apantelini		Apanteles		obscurus				(Nees, 1834)	<p style="margin-left: 40px;"><i>Microgaster obscura</i> Nees, 1834</p><p style="margin-left: 40px;"><i>arenarius </i>(Haliday, 1834) </p>							England, Ireland
41175	Animalia		Arthropoda			Insecta			Hymenoptera			Ichneumonoidea	Braconidae	Microgastrinae	Apantelini		Apanteles		sodalis				(Haliday, 1834)	<p style="margin-left: 40px;"><i>Microgaster sodalis</i> Haliday, 1834</p><p style="margin-left: 40px;"><i>carbonarius </i>(Ratzeburg, 1848) preocc.</p><p style="margin-left: 40px;"><i>ater </i>(Ratzeburg, 1852) </p><p style="margin-left: 40px;"><i>lugens </i>(Ratzeburg, 1852) </p><p style="margin-left: 40px;"><i>lindbergi </i>Hedqvist, 1965 </p>							England
41176	Animalia		Arthropoda			Insecta			Hymenoptera			Ichneumonoidea	Braconidae	Microgastrinae	Apantelini		Apanteles		xanthostigma				(Haliday, 1834)	<p style="margin-left: 40px;"><i>Microgaster xanthostigma</i> Haliday, 1834</p><p style="margin-left: 40px;"><i>ochrostigma </i>(Wesmael, 1837) </p><p style="margin-left: 40px;"><i>xanthocarpus </i>Szépligeti, 1901 </p>							England, Scotland, Wales, Isle of Man
41177	Animalia		Arthropoda			Insecta			Hymenoptera			Ichneumonoidea	Braconidae	Microgastrinae	Apantelini		Choeras						Mason, 1981
41178	Animalia		Arthropoda			Insecta			Hymenoptera			Ichneumonoidea	Braconidae	Microgastrinae	Apantelini		Choeras		arene				(Nixon, 1973)	<p style="margin-left: 40px;"><i>Apanteles arene</i> Nixon, 1973</p>							England, Scotland, Ireland
41179	Animalia		Arthropoda			Insecta			Hymenoptera			Ichneumonoidea	Braconidae	Microgastrinae	Apantelini		Choeras		dorsalis				(Spinola, 1808)	<p style="margin-left: 40px;"><i>Microgaster dorsalis</i> Spinola, 1808</p><p style="margin-left: 40px;"><i>cruciatus </i>(Ratzeburg, 1844) </p><p style="margin-left: 40px;"><i>suffolciensis </i>(Morley, 1902) </p>							England, Wales
41180	Animalia		Arthropoda			Insecta			Hymenoptera			Ichneumonoidea	Braconidae	Microgastrinae	Apantelini		Choeras		parasitellae				(Bouché, 1834)	<p style="margin-left: 40px;"><i>Microgaster parasitellae</i> Bouché, 1834</p><p style="margin-left: 40px;"><i>adjuncta </i>misident. </p><p style="margin-left: 40px;"><i>flavilabris </i>(Ratzeburg, 1844) </p><p style="margin-left: 40px;"><i>rufilabris </i>(Ratzeburg, 1844) </p><p style="margin-left: 40px;"><i>lictorius </i>(Reinhard, 1880) </p><p style="margin-left: 40px;"><i>polypori </i>(Gauti…							England, Scotland		Listed under Apanteles and Microgaster in Huddleston (1978).
41181	Animalia		Arthropoda			Insecta			Hymenoptera			Ichneumonoidea	Braconidae	Microgastrinae	Apantelini		Choeras		ruficornis				(Nees, 1834)	<p style="margin-left: 40px;"><i>Microgaster ruficornis</i> Nees, 1834</p><p style="margin-left: 40px;"><i>hedymeles </i>(Nixon, 1973) </p>							England
41182	Animalia		Arthropoda			Insecta			Hymenoptera			Ichneumonoidea	Braconidae	Microgastrinae	Apantelini		Choeras		tedellae				(Nixon, 1961)	<p style="margin-left: 40px;"><i>Apanteles tedellae</i> Nixon, 1961</p><p style="margin-left: 40px;"><i>epinotiae </i>(Fischer, 1962) </p><p style="margin-left: 40px;"><i>epinoticida </i>(Fischer, 1966) </p>							England
41183	Animalia		Arthropoda			Insecta			Hymenoptera			Ichneumonoidea	Braconidae	Microgastrinae	Apantelini		Choeras		tiro				(Reinhard, 1880)	<p style="margin-left: 40px;"><i>Microgaster tiro</i> Reinhard, 1880</p>							England
41184	Animalia		Arthropoda			Insecta			Hymenoptera			Ichneumonoidea	Braconidae	Microgastrinae	Apantelini		Choeras		validus				(Thomson, 1895)	<p style="margin-left: 40px;"><i>Apanteles validus</i> Thomson, 1895</p>							England
41185	Animalia		Arthropoda			Insecta			Hymenoptera			Ichneumonoidea	Braconidae	Microgastrinae	Apantelini		Dolichogenidea						Viereck, 1911										species of Dolichogenidea excluded from the British and Irish list: [anarsiae (Faure &amp; Alabouvette, 1924, Apanteles)] Listed as a British species by Huddleston (1978) in error, there are no British records. [cerialis (Nixon, 1976, Apanteles) areolaris (Balevski &amp; Tobias, 1980, Apanteles) preocc.] Listed as a British species by Huddleston (1978) in error, only known from southern and Easte…
41186	Animalia		Arthropoda			Insecta			Hymenoptera			Ichneumonoidea	Braconidae	Microgastrinae	Apantelini		Dolichogenidea		agilla				(Nixon, 1972)	<p style="margin-left: 40px;"><i>Apanteles agilla</i> Nixon, 1972</p><p style="margin-left: 40px;"><i>piratica </i>(Papp, 1977) </p>							England		added by Shaw (2012)
41187	Animalia		Arthropoda			Insecta			Hymenoptera			Ichneumonoidea	Braconidae	Microgastrinae	Apantelini		Dolichogenidea		annularis				(Haliday, 1834)	<p style="margin-left: 40px;"><i>Microgaster annularis</i> Haliday, 1834</p>							England
41188	Animalia		Arthropoda			Insecta			Hymenoptera			Ichneumonoidea	Braconidae	Microgastrinae	Apantelini		Dolichogenidea		appellator				(Telenga, 1949)	<p style="margin-left: 40px;"><i>Apanteles appellator</i> Telenga, 1949</p><p style="margin-left: 40px;"><i>litae </i>(Nixon, 1972) </p>							England		added by Shaw (2012);Papp (1988) notes, but does not follow, the view that appellator may be the valid name (cf. Kotenko and Tobias, 1986). Shaw (2012) has found that reared ‘appellator’ and ‘litae’ appear to be conspecific. The situation is complicated by Nixon’s (1972) treatment of some series (from a different host in Cyprus, and from Egypt) as ‘litae var operculellae’, and it is this that Pap…
41189	Animalia		Arthropoda			Insecta			Hymenoptera			Ichneumonoidea	Braconidae	Microgastrinae	Apantelini		Dolichogenidea		artissima				(Papp, 1971)	<p style="margin-left: 40px;"><i>Apanteles artissimus</i> Papp, 1971</p><p style="margin-left: 40px;"><i>abila </i>(Nixon, 1972) </p>							England, Scotland, Wales
41190	Animalia		Arthropoda			Insecta			Hymenoptera			Ichneumonoidea	Braconidae	Microgastrinae	Apantelini		Dolichogenidea		ate				(Nixon, 1973)	<p style="margin-left: 40px;"><i>Apanteles ate</i> Nixon, 1973</p>							England
41191	Animalia		Arthropoda			Insecta			Hymenoptera			Ichneumonoidea	Braconidae	Microgastrinae	Apantelini		Dolichogenidea		bres				(Nixon, 1973)	<p style="margin-left: 40px;"><i>Apanteles bres</i> Nixon, 1973</p>							England
41192	Animalia		Arthropoda			Insecta			Hymenoptera			Ichneumonoidea	Braconidae	Microgastrinae	Apantelini		Dolichogenidea		breviventris				(Ratzeburg, 1848)	<p style="margin-left: 40px;"><i>Microgaster breviventris</i> Ratzeburg, 1848</p><p style="margin-left: 40px;"><i>mesoxantha </i>(Ruschka, 1917) </p><p style="margin-left: 40px;"><i>nilae </i>(Telenga, 1961) </p>							England, Scotland, Wales, Ireland
41193	Animalia		Arthropoda			Insecta			Hymenoptera			Ichneumonoidea	Braconidae	Microgastrinae	Apantelini		Dolichogenidea		britannica				(Wilkinson, 1941)	<p style="margin-left: 40px;"><i>Apanteles britannicus</i> Wilkinson, 1941</p>							England
41194	Animalia		Arthropoda			Insecta			Hymenoptera			Ichneumonoidea	Braconidae	Microgastrinae	Apantelini		Dolichogenidea		candidata				(Haliday, 1834)	<p style="margin-left: 40px;"><i>Microgaster candidatus</i> Haliday, 1834</p><p style="margin-left: 40px;"><i>longicauda </i>(Wesmael, 1837) </p><p style="margin-left: 40px;"><i>terebrator </i>(Ratzeburg, 1852) </p>							England, Scotland, Wales, Isle of Man
41195	Animalia		Arthropoda			Insecta			Hymenoptera			Ichneumonoidea	Braconidae	Microgastrinae	Apantelini		Dolichogenidea		coleophorae				(Wilkinson, 1938)	<p style="margin-left: 40px;"><i>Apanteles coleophorae</i> Wilkinson, 1938</p>							England
41196	Animalia		Arthropoda			Insecta			Hymenoptera			Ichneumonoidea	Braconidae	Microgastrinae	Apantelini		Dolichogenidea		coniferae				(Haliday, 1834)	<p style="margin-left: 40px;"><i>Microgaster coniferae</i> Haliday, 1834</p>							England, Isle of Man		Revised status (Shaw, 2012): inadvertently listed as a synonym of candidata by van Achterberg (1997) due to a drafting error (van Achterberg, pers. comm.).
41197	Animalia		Arthropoda			Insecta			Hymenoptera			Ichneumonoidea	Braconidae	Microgastrinae	Apantelini		Dolichogenidea		credne				(Nixon, 1973)	<p style="margin-left: 40px;"><i>Apanteles credne</i> Nixon, 1973</p>							England
41198	Animalia		Arthropoda			Insecta			Hymenoptera			Ichneumonoidea	Braconidae	Microgastrinae	Apantelini		Dolichogenidea		cytherea				(Nixon, 1972)	<p style="margin-left: 40px;"><i>Apanteles cytherea</i> Nixon, 1972</p>							England
41199	Animalia		Arthropoda			Insecta			Hymenoptera			Ichneumonoidea	Braconidae	Microgastrinae	Apantelini		Dolichogenidea		decora				(Haliday, 1834)	<p style="margin-left: 40px;"><i>Microgaster decorus</i> Haliday, 1834</p><p style="margin-left: 40px;"><i>lineata </i>(Reinhard, 1880) </p><p style="margin-left: 40px;"><i>sibirica </i>Fahringer, 1938 </p>							Ireland
41200	Animalia		Arthropoda			Insecta			Hymenoptera			Ichneumonoidea	Braconidae	Microgastrinae	Apantelini		Dolichogenidea		dilecta				(Haliday, 1834)	<p style="margin-left: 40px;"><i>Microgaster dilectus</i> Haliday, 1834</p><p style="margin-left: 40px;"><i>femoralis </i>(Bouché, 1834) </p>							England, Isle of Man
41201	Animalia		Arthropoda			Insecta			Hymenoptera			Ichneumonoidea	Braconidae	Microgastrinae	Apantelini		Dolichogenidea		drusilla				(Nixon, 1972)	<p style="margin-left: 40px;"><i>Apanteles drusilla</i> Nixon, 1972</p>							England
41202	Animalia		Arthropoda			Insecta			Hymenoptera			Ichneumonoidea	Braconidae	Microgastrinae	Apantelini		Dolichogenidea		emarginata				(Nees, 1834)	<p style="margin-left: 40px;"><i>Microgaster emarginatus</i> Nees, 1834</p><p style="margin-left: 40px;"><i>scapularis </i>(Bouché,1834) </p>							England, Scotland, Wales
41203	Animalia		Arthropoda			Insecta			Hymenoptera			Ichneumonoidea	Braconidae	Microgastrinae	Apantelini		Dolichogenidea		exilis				(Haliday, 1834)	<p style="margin-left: 40px;"><i>Microgaster exilis</i> Haliday, 1834</p>							England		Shaw (2012) gives a diagnosis; not treated by Nixon or Papp.
41204	Animalia		Arthropoda			Insecta			Hymenoptera			Ichneumonoidea	Braconidae	Microgastrinae	Apantelini		Dolichogenidea		faucula				(Nixon, 1972)	<p style="margin-left: 40px;"><i>Apanteles faucula</i> Nixon, 1972</p>							England
41205	Animalia		Arthropoda			Insecta			Hymenoptera			Ichneumonoidea	Braconidae	Microgastrinae	Apantelini		Dolichogenidea		gagates				(Nees, 1834)	<p style="margin-left: 40px;"><i>Microgaster gagates</i> Nees, 1834</p>							England
41206	Animalia		Arthropoda			Insecta			Hymenoptera			Ichneumonoidea	Braconidae	Microgastrinae	Apantelini		Dolichogenidea		glabra				(Papp, 1978)	<p style="margin-left: 40px;"><i>Apanteles glaber</i> Papp, 1978</p>							England, Scotland		added by Shaw (2012)
41207	Animalia		Arthropoda			Insecta			Hymenoptera			Ichneumonoidea	Braconidae	Microgastrinae	Apantelini		Dolichogenidea		gracilariae				(Wilkinson, 1940)	<p style="margin-left: 40px;"><i>Apanteles gracilariae</i> Wilkinson, 1940</p>							England, Isle of Man
41208	Animalia		Arthropoda			Insecta			Hymenoptera			Ichneumonoidea	Braconidae	Microgastrinae	Apantelini		Dolichogenidea		halidayi				(Marshall, 1872)	<p style="margin-left: 40px;"><i>Apanteles halidayi</i> Marshall, 1872</p><p style="margin-left: 40px;"><i>albipennis </i>(Haliday, 1834) preocc.</p><p style="margin-left: 40px;"><i>halidaii </i>misspelling </p>							England, Scotland, Isle of Man
41209	Animalia		Arthropoda			Insecta			Hymenoptera			Ichneumonoidea	Braconidae	Microgastrinae	Apantelini		Dolichogenidea		hilaris				(Haliday, 1834)	<p style="margin-left: 40px;"><i>Microgaster hilaris</i> Haliday, 1834</p>							Ireland
41210	Animalia		Arthropoda			Insecta			Hymenoptera			Ichneumonoidea	Braconidae	Microgastrinae	Apantelini		Dolichogenidea		imperator				(Wilkinson, 1939)	<p style="margin-left: 40px;"><i>Apanteles imperator</i> Wilkinson, 1939</p>							England, Scotland, Wales, Isle of Man
41211	Animalia		Arthropoda			Insecta			Hymenoptera			Ichneumonoidea	Braconidae	Microgastrinae	Apantelini		Dolichogenidea		infima				(Haliday, 1834)	<p style="margin-left: 40px;"><i>Microgaster infimus</i> Haliday, 1834</p>							England
41212	Animalia		Arthropoda			Insecta			Hymenoptera			Ichneumonoidea	Braconidae	Microgastrinae	Apantelini		Dolichogenidea		lacteicolor				(Viereck, 1911)	<p style="margin-left: 40px;"><i>Apanteles lacteicolor</i> Viereck, 1911</p><p style="margin-left: 40px;"><i>conspersae </i>(Fiske, 1911) </p>							England
41213	Animalia		Arthropoda			Insecta			Hymenoptera			Ichneumonoidea	Braconidae	Microgastrinae	Apantelini		Dolichogenidea		lacteipennis				(Curtis, 1830)	<p style="margin-left: 40px;"><i>Microgaster lacteipennis</i> Curtis, 1830</p><p style="margin-left: 40px;"><i>lissonota </i>(Tobias, 1964) </p>
41214	Animalia		Arthropoda			Insecta			Hymenoptera			Ichneumonoidea	Braconidae	Microgastrinae	Apantelini		Dolichogenidea		laevigata				(Ratzeburg, 1848)	<p style="margin-left: 40px;"><i>Microgaster laevigatus</i> Ratzeburg, 1848</p><p style="margin-left: 40px;"><i>hoplites </i>(Ratzeburg, 1848) </p><p style="margin-left: 40px;"><i>calcarata </i>(Ivanov, 1899) </p>							England, Scotland, Wales
41215	Animalia		Arthropoda			Insecta			Hymenoptera			Ichneumonoidea	Braconidae	Microgastrinae	Apantelini		Dolichogenidea		laevigatoides				(Nixon, 1972)	<p style="margin-left: 40px;"><i>Apanteles laevigatoides</i> Nixon, 1972</p>							England
41216	Animalia		Arthropoda			Insecta			Hymenoptera			Ichneumonoidea	Braconidae	Microgastrinae	Apantelini		Dolichogenidea		laevissima				(Ratzeburg, 1848)	<p style="margin-left: 40px;"><i>Microgaster laevissimus</i> Ratzeburg, 1848</p><p style="margin-left: 40px;"><i>tersa </i>(Papp, 1973) </p>							England
41217	Animalia		Arthropoda			Insecta			Hymenoptera			Ichneumonoidea	Braconidae	Microgastrinae	Apantelini		Dolichogenidea		lemariei				(Nixon, 1961)	<p style="margin-left: 40px;"><i>Apanteles lemariei</i> Nixon, 1961</p>							England
41218	Animalia		Arthropoda			Insecta			Hymenoptera			Ichneumonoidea	Braconidae	Microgastrinae	Apantelini		Dolichogenidea		lineipes				(Wesmael, 1837)	<p style="margin-left: 40px;"><i>Microgaster lineipes</i> Wesmael, 1837</p>							England, Scotland, Isle of Man
41219	Animalia		Arthropoda			Insecta			Hymenoptera			Ichneumonoidea	Braconidae	Microgastrinae	Apantelini		Dolichogenidea		longicalcar				(Thomson, 1895)	<p style="margin-left: 40px;"><i>Apanteles longicalcar</i> Thomson, 1895</p>							England
41220	Animalia		Arthropoda			Insecta			Hymenoptera			Ichneumonoidea	Braconidae	Microgastrinae	Apantelini		Dolichogenidea		longipalpis				(Reinhard, 1880)	<p style="margin-left: 40px;"><i>Apanteles longipalpis</i> Reinhard, 1880</p><p style="margin-left: 40px;"><i>tadzhica </i>(Telenga, 1949) </p>							England, Scotland		Papp (1981) reports that the type series of tadzhica belongs to two species (lacteus and longipalpis) but did not select a lectotype; Belokobylskij et al. (2003) treated the name as a synonym of longipalpis.
41221	Animalia		Arthropoda			Insecta			Hymenoptera			Ichneumonoidea	Braconidae	Microgastrinae	Apantelini		Dolichogenidea		marica				(Nixon, 1972)	<p style="margin-left: 40px;"><i>Apanteles marica</i> Nixon, 1972</p>							England
41222	Animalia		Arthropoda			Insecta			Hymenoptera			Ichneumonoidea	Braconidae	Microgastrinae	Apantelini		Dolichogenidea		myron				(Nixon, 1973)	<p style="margin-left: 40px;"><i>Apanteles myron</i> Nixon, 1973</p>							England, Scotland		Transferred from Apanteles in anticipation of publication by Jose Fernandez-Triana.
41223	Animalia		Arthropoda			Insecta			Hymenoptera			Ichneumonoidea	Braconidae	Microgastrinae	Apantelini		Dolichogenidea		ononidis				(Marshall, 1889)	<p style="margin-left: 40px;"><i>Apanteles ononidis</i> Marshall, 1889</p>							England		Shaw (2012) gives a diagnosis; not treated by Nixon or Papp.
41224	Animalia		Arthropoda			Insecta			Hymenoptera			Ichneumonoidea	Braconidae	Microgastrinae	Apantelini		Dolichogenidea		petrovae				(Walley, 1937)	<p style="margin-left: 40px;"><i>Apanteles petrovae</i> Walley, 1937</p><p style="margin-left: 40px;"><i>dioryctriae </i>(Wilkinson, 1938) </p><p style="margin-left: 40px;"><i>magna </i>(Telenga, 1955) </p><p style="margin-left: 40px;"><i>murinanae </i>(?apek &amp; Zwölfer, 1957) </p>							England		added by Shaw (2012)
41225	Animalia		Arthropoda			Insecta			Hymenoptera			Ichneumonoidea	Braconidae	Microgastrinae	Apantelini		Dolichogenidea		phaloniae				(Wilkinson, 1940)	<p style="margin-left: 40px;"><i>Apanteles phaloniae</i> Wilkinson, 1940</p>							England, Scotland, Wales, Ireland
41226	Animalia		Arthropoda			Insecta			Hymenoptera			Ichneumonoidea	Braconidae	Microgastrinae	Apantelini		Dolichogenidea		phaola				(Nixon, 1972)	<p style="margin-left: 40px;"><i>Apanteles phaola</i> Nixon, 1972</p>							England
41227	Animalia		Arthropoda			Insecta			Hymenoptera			Ichneumonoidea	Braconidae	Microgastrinae	Apantelini		Dolichogenidea		praetor				(Marshall, 1885)	<p style="margin-left: 40px;"><i>Apanteles praetor</i> Marshall, 1885</p>							England
41228	Animalia		Arthropoda			Insecta			Hymenoptera			Ichneumonoidea	Braconidae	Microgastrinae	Apantelini		Dolichogenidea		princeps				(Wilkinson, 1941)	<p style="margin-left: 40px;"><i>Apanteles princeps</i> Wilkinson, 1941</p>							England, Scotland, Wales
41229	Animalia		Arthropoda			Insecta			Hymenoptera			Ichneumonoidea	Braconidae	Microgastrinae	Apantelini		Dolichogenidea		punctiger				(Wesmael, 1837)	<p style="margin-left: 40px;"><i>Microgaster punctiger</i> Wesmael, 1837</p><p style="margin-left: 40px;"><i>itea </i>(Nixon, 1972) </p>							England, Scotland
41230	Animalia		Arthropoda			Insecta			Hymenoptera			Ichneumonoidea	Braconidae	Microgastrinae	Apantelini		Dolichogenidea		sicaria				(Marshall, 1885)	<p style="margin-left: 40px;"><i>Apanteles sicarius</i> Marshall, 1885</p><p style="margin-left: 40px;"><i>chrysosticta </i>(Marshall, 1899) </p><p style="margin-left: 40px;"><i>crudelis </i>(Papp, 1971) </p>							England, Scotland
41231	Animalia		Arthropoda			Insecta			Hymenoptera			Ichneumonoidea	Braconidae	Microgastrinae	Apantelini		Dolichogenidea		sisenna				(Nixon, 1972)	<p style="margin-left: 40px;"><i>Apanteles sisenna</i> Nixon, 1972</p>							England		Recorded as British by Nixon (1972) but omitted by Huddleston (1978).
41232	Animalia		Arthropoda			Insecta			Hymenoptera			Ichneumonoidea	Braconidae	Microgastrinae	Apantelini		Dolichogenidea		soikai				(Nixon, 1972)	<p style="margin-left: 40px;"><i>Apanteles soikai</i> Nixon, 1972</p>							England		added by Shaw (2012)
41233	Animalia		Arthropoda			Insecta			Hymenoptera			Ichneumonoidea	Braconidae	Microgastrinae	Apantelini		Dolichogenidea		trachala				(Nixon, 1965)	<p style="margin-left: 40px;"><i>Apanteles trachalus</i> Nixon, 1965</p><p style="margin-left: 40px;"><i>sevocata </i>(Papp, 1975) </p>							England, Scotland, Wales, Ireland		#A parasitoid of synanthropic Lepidoptera species and probably introduced to Britain and Ireland (Nixon, 1976).
41234	Animalia		Arthropoda			Insecta			Hymenoptera			Ichneumonoidea	Braconidae	Microgastrinae	Apantelini		Dolichogenidea		ultor				(Reinhard, 1880)	<p style="margin-left: 40px;"><i>Apanteles ultor</i> Reinhard, 1880</p><p style="margin-left: 40px;"><i>lactipennis </i>(Ratzeburg, 1852) preocc.</p>							England
41235	Animalia		Arthropoda			Insecta			Hymenoptera			Ichneumonoidea	Braconidae	Microgastrinae	Apantelini		Dolichogenidea		victor				(Wilkinson, 1941)	<p style="margin-left: 40px;"><i>Apanteles victor</i> Wilkinson, 1941</p>							England
41236	Animalia		Arthropoda			Insecta			Hymenoptera			Ichneumonoidea	Braconidae	Microgastrinae	Apantelini		Illidops						Mason, 1981
41237	Animalia		Arthropoda			Insecta			Hymenoptera			Ichneumonoidea	Braconidae	Microgastrinae	Apantelini		Illidops		butalidis				(Marshall, 1888)	<p style="margin-left: 40px;"><i>Apanteles butalidis</i> Marshall, 1888</p>							England, Scotland
41238	Animalia		Arthropoda			Insecta			Hymenoptera			Ichneumonoidea	Braconidae	Microgastrinae	Apantelini		Illidops		naso				(Marshall, 1885)	<p style="margin-left: 40px;"><i>Apanteles naso</i> Marshall, 1885</p><p style="margin-left: 40px;"><i>contortus </i>(Tobias, 1964) </p><p style="margin-left: 40px;"><i>crantor </i>(Nixon, 1965) </p><p style="margin-left: 40px;"><i>evander </i>(Nixon, 1965) </p><p style="margin-left: 40px;"><i>coresia </i>(Nixon, 1973) </p>							England
41239	Animalia		Arthropoda			Insecta			Hymenoptera			Ichneumonoidea	Braconidae	Microgastrinae	Apantelini		Illidops		suevus				(Reinhard, 1880)	<p style="margin-left: 40px;"><i>Apanteles suevus</i> Reinhard, 1880</p><p style="margin-left: 40px;"><i>minutus </i>(Szépligeti, 1896) </p><p style="margin-left: 40px;"><i>polonicus </i>(Fahringer, 1936) </p><p style="margin-left: 40px;"><i>brevisternis </i>(Tobias, 1964) </p><p style="margin-left: 40px;"><i>suspicax </i>(Tobias, 1964) </p><p style="margin-left: 40px;"><i>dion </i>(Nixon, 1965) …							England
41240	Animalia		Arthropoda			Insecta			Hymenoptera			Ichneumonoidea	Braconidae	Microgastrinae	Apantelini		Napamus						Papp, 1993										species of Napamus excluded from the British and Irish list: [vipio (Reinhard, 1880, Apanteles)] Mistakenly listed as a British species by Kloet &amp; Hincks (1945) and Huddleston (1978). Shenefelt (1973) listed it as British on the misunderstanding that Morley &amp; Rait-Smith (1933) had produced a catalogue of British Lepidoptera-parasitoid asscociations, whereas their listings also included no…
41241	Animalia		Arthropoda			Insecta			Hymenoptera			Ichneumonoidea	Braconidae	Microgastrinae	Apantelini		Pholetesor						Mason, 1981
41242	Animalia		Arthropoda			Insecta			Hymenoptera			Ichneumonoidea	Braconidae	Microgastrinae	Apantelini		Pholetesor		arisba				(Nixon, 1973)	<p style="margin-left: 40px;"><i>Apanteles arisba</i> Nixon, 1973</p>							England, Scotland
41243	Animalia		Arthropoda			Insecta			Hymenoptera			Ichneumonoidea	Braconidae	Microgastrinae	Apantelini		Pholetesor		bicolor				(Nees, 1834)	<p style="margin-left: 40px;"><i>Microgaster bicolor</i> Nees, 1834</p><p style="margin-left: 40px;"><i>ardeaepenellae </i>(Bouché, 1834) </p><p style="margin-left: 40px;"><i>pedias </i>(Nixon, 1973) </p><p style="margin-left: 40px;"><i>umbellatarum </i>(Haliday, 1834) </p><p style="margin-left: 40px;"><i>schillei </i>(Niezabitowski, 1910) </p><p style="margin-left: 40px;"><i>longicauda </i>(Fahr…							England		some distribution data from Shaw &amp; Askew (1976). Van Achterberg’s (1997) synonymy of bicolor under circumscriptus is not followed here (Shaw, 2012); it is probable that his reared series represents two species, bicolor and circumscriptus.
41244	Animalia		Arthropoda			Insecta			Hymenoptera			Ichneumonoidea	Braconidae	Microgastrinae	Apantelini		Pholetesor		circumscriptus				(Nees, 1834)	<p style="margin-left: 40px;"><i>Microgaster circumscriptus</i> Nees, 1834</p><p style="margin-left: 40px;"><i>exiguus </i>(Haliday, 1834) </p><p style="margin-left: 40px;"><i>blancardellae </i>(Bouché, 1834) </p><p style="margin-left: 40px;"><i>lividipes </i>(Wesmael, 1837) </p><p style="margin-left: 40px;"><i>flavolimbatus </i>(Ratzeburg, 1848) </p><p style="margin-left: 40px;"><i>lautellus </i…							England, Scotland, Wales, Ireland
41245	Animalia		Arthropoda			Insecta			Hymenoptera			Ichneumonoidea	Braconidae	Microgastrinae	Apantelini		Pholetesor		elpis				(Nixon, 1973)	<p style="margin-left: 40px;"><i>Apanteles elpis</i> Nixon, 1973</p><p style="margin-left: 40px;"><i>girkanus </i>(Tobias, 1976) </p>							England
41246	Animalia		Arthropoda			Insecta			Hymenoptera			Ichneumonoidea	Braconidae	Microgastrinae	Apantelini		Pholetesor		errans				(Nixon, 1973)	<p style="margin-left: 40px;"><i>Apanteles errans</i> Nixon, 1973</p><p style="margin-left: 40px;"><i>arenicola </i>(Papp, 1973) </p>							England
41247	Animalia		Arthropoda			Insecta			Hymenoptera			Ichneumonoidea	Braconidae	Microgastrinae	Apantelini		Pholetesor		laetus				(Marshall, 1885)	<p style="margin-left: 40px;"><i>Apanteles laetus</i> Marshall, 1885</p><p style="margin-left: 40px;"><i>exiguus </i> misident.</p><p style="margin-left: 40px;"><i>salalicus </i> misident.</p><p style="margin-left: 40px;"><i>metallicus </i>(Jakimavičius, 1972) </p>							England, Scotland		Shaw (2012) tentatively identified exiguus sensu Nixon (1973) as an extreme of morphological variation within laetus.
41248	Animalia		Arthropoda			Insecta			Hymenoptera			Ichneumonoidea	Braconidae	Microgastrinae	Apantelini		Pholetesor		maritimus				(Wilkinson, 1941)	<p style="margin-left: 40px;"><i>Apanteles maritimus</i> Wilkinson, 1941</p>							England, Scotland, Wales
41249	Animalia		Arthropoda			Insecta			Hymenoptera			Ichneumonoidea	Braconidae	Microgastrinae	Apantelini		Pholetesor		moldavicus				(Tobias, 1975)	<p style="margin-left: 40px;"><i>Apanteles moldavicus</i> Tobias, 1975</p>							England		added by Shaw (2012). Although this generic placement (Papp, 1988) was followed by Shaw (2012) is seems very likely to be inappropriate.
41250	Animalia		Arthropoda			Insecta			Hymenoptera			Ichneumonoidea	Braconidae	Microgastrinae	Apantelini		Pholetesor		nanus				(Reinhard, 1880)	<p style="margin-left: 40px;"><i>Apanteles nanus</i> Reinhard, 1880</p><p style="margin-left: 40px;"><i>szoecsi </i>(Papp, 1973) </p>							England, Scotland, Wales, Isle of Man
41251	Animalia		Arthropoda			Insecta			Hymenoptera			Ichneumonoidea	Braconidae	Microgastrinae	Apantelini		Pholetesor		phaetusa				(Nixon, 1973)	<p style="margin-left: 40px;"><i>Apanteles phaetusa</i> Nixon, 1973</p>							England, Scotland
41252	Animalia		Arthropoda			Insecta			Hymenoptera			Ichneumonoidea	Braconidae	Microgastrinae	Apantelini		Pholetesor		viminetorum				(Wesmael, 1837)	<p style="margin-left: 40px;"><i>Microgaster viminetorum</i> Wesmael, 1837</p><p style="margin-left: 40px;"><i>fuliginosus </i>(Wesmael, 1837) </p>							England, Scotland, Wales, Ireland
41253	Animalia		Arthropoda			Insecta			Hymenoptera			Ichneumonoidea	Braconidae	Microgastrinae	Cotesiini								Mason, 1981
41254	Animalia		Arthropoda			Insecta			Hymenoptera			Ichneumonoidea	Braconidae	Microgastrinae	Cotesiini		Cotesia						Cameron, 1891	<p style="margin-left: 40px;"><i>CRYPTAPANTELES </i>Viereck, 1910 </p><p style="margin-left: 40px;"><i>STENOPLEURA </i>Viereck, 1911 </p>									Some taxonomic and distribution data for species parasitizing Lycaenidae taken from Shaw (2007). species of Cotesia excluded from the British and Irish list: [acuminata (Reinhard, 1880, Apanteles) cultrator (Marshall, 1885, Apanteles)] Not a British or Irish species. Marshall’s description was based on unprovenanced material reared from a host that, on inspection by MRS, is almost certainly not B…
41255	Animalia		Arthropoda			Insecta			Hymenoptera			Ichneumonoidea	Braconidae	Microgastrinae	Cotesiini		Cotesia		abjecta				(Marshall, 1885)	<p style="margin-left: 40px;"><i>Apanteles abjectus </i>Marshall, 1885</p><p style="margin-left: 40px;"><i>complanata </i>(Lyle, 1916, <i>Apanteles</i>)</p>							England, Scotland
41256	Animalia		Arthropoda			Insecta			Hymenoptera			Ichneumonoidea	Braconidae	Microgastrinae	Cotesiini		Cotesia		affinis				(Nees, 1834)	<p style="margin-left: 40px;"><i>Microgaster affinis </i>Nees, 1834</p><p style="margin-left: 40px;"><i>euphorbiae </i>(Bouché, 1834, <i>Microgaster</i>)</p><p style="margin-left: 40px;"><i>vinulae </i>(Bouché, 1834, <i>Microgaster</i>)</p><p style="margin-left: 40px;"><i>harpyiae </i>(Niezabitowski, 1910, <i>Apanteles</i>)</p><p style="margin-left: 40px;"><i>okamotoi </i>(Watanabe, 1932, <i>Apan…							England
41257	Animalia		Arthropoda			Insecta			Hymenoptera			Ichneumonoidea	Braconidae	Microgastrinae	Cotesiini		Cotesia		analis				(Nees, 1834)	<p style="margin-left: 40px;"><i>Microgaster analis </i>Nees, 1834</p><p style="margin-left: 40px;"><i>praetextata </i>(Haliday, 1834, <i>Microgaster</i>)</p><p style="margin-left: 40px;"><i>mediana </i>(Ratzeburg, 1852, <i>Microgaster</i>)</p><p style="margin-left: 40px;"><i>leucaniae </i>(Wikinson, 1937, <i>Apanteles</i>)</p>							England
41258	Animalia		Arthropoda			Insecta			Hymenoptera			Ichneumonoidea	Braconidae	Microgastrinae	Cotesiini		Cotesia		astrarches				(Marshall, 1889)	<p style="margin-left: 40px;"><i>Apanteles astrarches </i>Marshall, 1889</p><p style="margin-left: 40px;"><i>?arctica </i>(Thomson, 1895, <i>Apanteles</i>)</p><p style="margin-left: 40px;"><i>genalis </i>(Tobias, 1964, <i>Apanteles</i>)</p>							England, Scotland, Wales		Nixon’s (1974) arctica encompassed two species that occur in Britain, astrarches and tenebrosa. It is not clear which, if either, the name arctica is associated with. The name astrarches was placed, erroneosly, in synonymy with arctica by Nixon (1974), which was followed by Huddleston (1978). Shaw (2007) clarified the status of astrarches.
41259	Animalia		Arthropoda			Insecta			Hymenoptera			Ichneumonoidea	Braconidae	Microgastrinae	Cotesiini		Cotesia		bignellii				(Marshall, 1885)	<p style="margin-left: 40px;"><i>Apanteles bignellii </i>Marshall, 1885</p>							England, Scotland, Wales, Ireland
41260	Animalia		Arthropoda			Insecta			Hymenoptera			Ichneumonoidea	Braconidae	Microgastrinae	Cotesiini		Cotesia		brevicornis				(Wesmael, 1837)	<p style="margin-left: 40px;"><i>Microgaster brevicornis </i>Wesmael, 1837</p><p style="margin-left: 40px;"><i>cleoceridis </i>(Marshall, 1889, <i>Apanteles</i>)</p>							England, Scotland
41261	Animalia		Arthropoda			Insecta			Hymenoptera			Ichneumonoidea	Braconidae	Microgastrinae	Cotesiini		Cotesia		cajae				(Bouché, 1834)	<p style="margin-left: 40px;"><i>Microgaster cajae </i>Bouché, 1834</p><p style="margin-left: 40px;"><i>difficilis </i>(Nees, 1834, <i>Microgaster</i>)</p>							England
41262	Animalia		Arthropoda			Insecta			Hymenoptera			Ichneumonoidea	Braconidae	Microgastrinae	Cotesiini		Cotesia		callimone				(Nixon, 1974)	<p style="margin-left: 40px;"><i>Apanteles callimone </i>Nixon, 1974</p><p style="margin-left: 40px;"><i>scelerata </i>(Tobias, 1986, <i>Apanteles</i>)</p>							Scotland, Wales, Ireland
41263	Animalia		Arthropoda			Insecta			Hymenoptera			Ichneumonoidea	Braconidae	Microgastrinae	Cotesiini		Cotesia		chares				(Nixon, 1965)	<p style="margin-left: 40px;"><i>Apanteles chares </i>Nixon, 1965</p>							England
41264	Animalia		Arthropoda			Insecta			Hymenoptera			Ichneumonoidea	Braconidae	Microgastrinae	Cotesiini		Cotesia		cleora				(Nixon, 1974)	<p style="margin-left: 40px;"><i>Apanteles cleora </i>Nixon, 1974</p>							England
41265	Animalia		Arthropoda			Insecta			Hymenoptera			Ichneumonoidea	Braconidae	Microgastrinae	Cotesiini		Cotesia		coryphe				(Nixon, 1974)	<p style="margin-left: 40px;"><i>Apanteles coryphe </i>Nixon, 1974</p>							England		Papp (1987) synonymised coryphe under rubripes but this seems unwarranted, given the distinctly different hosts and other aspects of biology.
41266	Animalia		Arthropoda			Insecta			Hymenoptera			Ichneumonoidea	Braconidae	Microgastrinae	Cotesiini		Cotesia		cuprea				(Lyle, 1925)	<p style="margin-left: 40px;"><i>Apanteles cupreus </i>Lyle, 1925</p>							England, Scotland
41267	Animalia		Arthropoda			Insecta			Hymenoptera			Ichneumonoidea	Braconidae	Microgastrinae	Cotesiini		Cotesia		errator				(Nixon, 1974)	<p style="margin-left: 40px;"><i>Apanteles errator </i>Nixon, 1974</p>							England, Wales
41268	Animalia		Arthropoda			Insecta			Hymenoptera			Ichneumonoidea	Braconidae	Microgastrinae	Cotesiini		Cotesia		eulipis				(Nixon, 1974)	<p style="margin-left: 40px;"><i>Apanteles eulipis </i>Nixon, 1974</p><p style="margin-left: 40px;"><i>eulipsis </i> misspelling</p>							England, Scotland
41269	Animalia		Arthropoda			Insecta			Hymenoptera			Ichneumonoidea	Braconidae	Microgastrinae	Cotesiini		Cotesia		?euryale				(Nixon, 1974)	<p style="margin-left: 40px;"><i>Apanteles euryale </i>Nixon, 1974</p>							England		It is not clear from Nixon (1974) that this species occurs in Britain, despite its being ‘bred in captivity at Slough’.
41270	Animalia		Arthropoda			Insecta			Hymenoptera			Ichneumonoidea	Braconidae	Microgastrinae	Cotesiini		Cotesia		ferruginea				(Marshall, 1885)	<p style="margin-left: 40px;"><i>Apanteles ferrugineus </i>Marshall, 1885</p>							England
41271	Animalia		Arthropoda			Insecta			Hymenoptera			Ichneumonoidea	Braconidae	Microgastrinae	Cotesiini		Cotesia		gades				(Nixon, 1974)	<p style="margin-left: 40px;"><i>Apanteles gades </i>Nixon, 1974</p>							England		added by Allen (1978)
41272	Animalia		Arthropoda			Insecta			Hymenoptera			Ichneumonoidea	Braconidae	Microgastrinae	Cotesiini		Cotesia		gastropachae				(Bouché, 1834)	<p style="margin-left: 40px;"><i>Microgaster gastropachae </i>Bouché, 1834</p>							England, Scotland, Isle of Man
41273	Animalia		Arthropoda			Insecta			Hymenoptera			Ichneumonoidea	Braconidae	Microgastrinae	Cotesiini		Cotesia		geryonis				(Marshall, 1885)	<p style="margin-left: 40px;"><i>Apanteles geryonis </i>Marshall, 1885</p>							England
41274	Animalia		Arthropoda			Insecta			Hymenoptera			Ichneumonoidea	Braconidae	Microgastrinae	Cotesiini		Cotesia		glomerata				(Linnaeus, 1758)	<p style="margin-left: 40px;"><i>Ichneumon glomeratus </i>Linnaeus, 1758</p><p style="margin-left: 40px;"><i>glomerator </i>(Thunberg, 1824, <i>Ichneumon</i>)</p><p style="margin-left: 40px;"><i>nigriventris </i>(Nees, 1834, <i>Microgaster</i>)</p><p style="margin-left: 40px;"><i>recondita </i>(Nees, 1834, <i>Microgaster</i>)</p><p style="margin-left: 40px;"><i>stellatarum </i>(Bouché, 1834, <i>M…							England, Scotland, Isle of Man
41275	Animalia		Arthropoda			Insecta			Hymenoptera			Ichneumonoidea	Braconidae	Microgastrinae	Cotesiini		Cotesia		gonopterygis				(Marshall, 1885)	<p style="margin-left: 40px;"><i>Apanteles gonopterygis </i>Marshall, 1885</p>							England
41276	Animalia		Arthropoda			Insecta			Hymenoptera			Ichneumonoidea	Braconidae	Microgastrinae	Cotesiini		Cotesia		hyphantriae				(Riley, 1887)	<p style="margin-left: 40px;"><i>Apanteles hyphantriae </i>Riley, 1887</p>							England, Wales
41277	Animalia		Arthropoda			Insecta			Hymenoptera			Ichneumonoidea	Braconidae	Microgastrinae	Cotesiini		Cotesia		inducta				(Papp, 1973)	<p style="margin-left: 40px;"><i>Apanteles inductus </i>Papp, 1973</p><p style="margin-left: 40px;"><i>tenuivalvis </i>(Tobias, 1986, <i>Apanteles</i>)</p>							England, Ireland		added by Revels (2006); Shaw (2007)
41278	Animalia		Arthropoda			Insecta			Hymenoptera			Ichneumonoidea	Braconidae	Microgastrinae	Cotesiini		Cotesia		isolde				(Nixon, 1974)	<p style="margin-left: 40px;"><i>Apanteles isolde </i>Nixon, 1974</p>							England, Scotland
41279	Animalia		Arthropoda			Insecta			Hymenoptera			Ichneumonoidea	Braconidae	Microgastrinae	Cotesiini		Cotesia		jucunda				(Marshall, 1885)	<p style="margin-left: 40px;"><i>Apanteles jucundus </i>Marshall, 1885</p><p style="margin-left: 40px;"><i>nigrinervis </i>(Thomson, 1895, <i>Microgaster</i>)</p>							England, Scotland
41280	Animalia		Arthropoda			Insecta			Hymenoptera			Ichneumonoidea	Braconidae	Microgastrinae	Cotesiini		Cotesia		juniperatae				(Bouché, 1834)	<p style="margin-left: 40px;"><i>Microgaster juniperatae </i>Bouché, 1834</p>							England, Scotland
41281	Animalia		Arthropoda			Insecta			Hymenoptera			Ichneumonoidea	Braconidae	Microgastrinae	Cotesiini		Cotesia		kurdjumovi				(Telenga, 1955)	<p style="margin-left: 40px;"><i>Apanteles kurdjumovi </i>Telenga, 1955</p><p style="margin-left: 40px;"><i>laverna </i>(Nixon, 1974, <i>Apanteles</i>)</p>							England, Scotland
41282	Animalia		Arthropoda			Insecta			Hymenoptera			Ichneumonoidea	Braconidae	Microgastrinae	Cotesiini		Cotesia		limbata				(Marshall, 1885)	<p style="margin-left: 40px;"><i>Apanteles limbatus </i>Marshall, 1885</p><p style="margin-left: 40px;"><i>kawadai </i>(Watanabe, 1934, <i>Apanteles</i>)</p>							England, Scotland
41283	Animalia		Arthropoda			Insecta			Hymenoptera			Ichneumonoidea	Braconidae	Microgastrinae	Cotesiini		Cotesia		lineola				(Curtis, 1830)	<p style="margin-left: 40px;"><i>Microgaster lineola </i>Curtis, 1830</p><p style="margin-left: 40px;"><i>gabrielis </i>(Gautier &amp; Riel, 1919, <i>Apanteles</i>)</p>							England
41284	Animalia		Arthropoda			Insecta			Hymenoptera			Ichneumonoidea	Braconidae	Microgastrinae	Cotesiini		Cotesia		melanoscela				(Ratzeburg, 1844)	<p style="margin-left: 40px;"><i>Microgaster melanoscelus </i>Ratzeburg, 1844</p><p style="margin-left: 40px;"><i>solitaria </i>(Ratzeburg, 1844, <i>Microgaster</i>)</p><p style="margin-left: 40px;"><i>creata </i>(Balevski, 1980, <i>Apanteles</i>)</p>							England
41285	Animalia		Arthropoda			Insecta			Hymenoptera			Ichneumonoidea	Braconidae	Microgastrinae	Cotesiini		Cotesia		melitaearum				(Wilkinson, 1937)	<p style="margin-left: 40px;"><i>Apanteles melitaearum </i>Wilkinson, 1937</p><p style="margin-left: 40px;"><i>melittaearum </i>misspelling </p><p style="margin-left: 40px;"><i>ukrainica </i>(Tobias, 1986, <i>Apanteles</i>)</p>							England, Scotland, Wales
[truncated: 395 more rows]

## Sheet: Materials
Taxon_Local_ID	typeStatus	catalogNumber	occurrenceDetails	occurrenceRemarks	recordNumber	recordedBy	individualID	individualCount	sex	lifeStage	reproductiveCondition	behavior	establishmentMeans	occurrenceStatus	preparations	disposition	otherCatalogNumbers	previousIdentifications	associatedMedia	associatedReferences	associatedOccurrences	associatedSequences	taxonID	scientificNameID	acceptedNameUsageID	parentNameUsageID	originalNameUsageID	nameAccordingToID	namePublishedInID	taxonConceptID	scientificName	acceptedNameUsage	parentNameUsage	originalNameUsage	nameAccordingTo	namePublishedIn	higherClassification	kingdom	phylum	class	order	family	genus	subgenus	specificEpithet	infraspecificEpithet	taxonRank	verbatimTaxonRank	scientificNameAuthorship
[truncated: 106 more columns]

[truncated: 1 more sheets: ExternalLinks]
